# Supplementary material
Source: publisher site journal article supplement (https://www.spandidos-publications.com/3953/downloadSupplementary)
Supplement: Supplementary file 1 [file downloadSupplementary]

## Sheet: Table_S4
Table SVI. Kyoto Encyclopedia of Genes and Genomes database annotation results.
pathway	class_B	class_A	koCount	koID	UnigeneCount	Unigene
Chromosome and associated proteins	Protein families: genetic information processing	Brite Hierarchies	734	K03094;K11452;K15588;K10695;K09189;K11723;K10801;K18403;K16533;K19382;K16808;K16452;K16488;K04986;K11366;K09186;K06669;K16756;K18422;K16537;K11466;K14304;K10276;K16810;K11295;K11479;K16569;K04498;K19346;K16480;K10426;K19402;K11661;K19608;K16591;K11669;K16779;K04354;K11589;K14960;K11650;K19201;K11584;K14437;K14438;K11253;K11267;K02516;K16547;K11583;K11459;K11323;K06062;K09667;K11420;K06670;K06709;…	2148	TRINITY_DN85_c0_g1;TRINITY_DN85_c5_g1;TRINITY_DN52_c0_g2;TRINITY_DN60_c0_g1;TRINITY_DN93_c0_g1;TRINITY_DN46_c3_g1;TRINITY_DN55_c2_g2;TRINITY_DN7_c0_g1;TRINITY_DN7_c0_g2;TRINITY_DN21_c0_g3;TRINITY_DN27_c0_g1;TRINITY_DN3_c0_g1;TRINITY_DN3_c0_g2;TRINITY_DN86_c5_g2;TRINITY_DN62_c2_g1;TRINITY_DN76_c0_g4;TRINITY_DN76_c0_g2;TRINITY_DN13_c2_g2;TRINITY_DN13_c2_g1;TRINITY_DN31_c0_g1;TRINITY_DN95_c2_g1;TRIN…
Membrane trafficking	Protein families: genetic information processing	Brite Hierarchies	547	K12471;K10591;K01099;K13709;K14005;K18261;K17920;K17092;K10068;K05411;K05758;K04550;K08337;K07893;K00888;K07194;K12473;K12495;K01528;K00922;K08009;K14003;K11982;K15291;K05699;K07902;K12396;K13738;K00889;K07887;K07952;K16779;K15300;K03084;K06094;K08510;K03231;K07875;K07874;K07941;K17301;K10396;K00134;K08269;K17906;K02833;K07909;K17902;K19006;K05757;K06588;K01623;K12393;K11825;K07910;K17455;K12331;…	2101	TRINITY_DN17_c0_g1;TRINITY_DN55_c8_g1;TRINITY_DN72_c2_g1;TRINITY_DN97_c2_g1;TRINITY_DN50_c1_g1;TRINITY_DN5_c0_g1;TRINITY_DN78_c0_g2;TRINITY_DN78_c12_g1;TRINITY_DN78_c6_g1;TRINITY_DN15_c0_g1;TRINITY_DN56_c2_g2;TRINITY_DN98_c1_g1;TRINITY_DN29_c5_g1;TRINITY_DN1_c1_g1;TRINITY_DN49_c0_g1;TRINITY_DN75_c0_g1;TRINITY_DN192_c2_g1;TRINITY_DN112_c0_g1;TRINITY_DN122_c1_g1;TRINITY_DN152_c0_g2;TRINITY_DN189_c1…
Ubiquitin system	Protein families: genetic information processing	Brite Hierarchies	548	K03094;K11452;K10695;K15704;K10591;K10694;K12177;K10489;K08337;K16271;K11366;K10662;K11855;K06084;K11964;K11863;K11968;K10276;K10615;K10684;K11982;K16060;K11853;K10469;K10518;K12181;K11980;K10692;K03178;K10698;K10505;K10493;K10274;K11847;K12022;K11836;K12180;K10585;K10312;K10300;K11849;K10261;K10593;K12231;K15690;K10456;K10325;K10508;K10275;K10140;K03351;K10685;K12164;K03362;K10575;K10515;K04416;…	1830	TRINITY_DN85_c0_g1;TRINITY_DN85_c5_g1;TRINITY_DN60_c0_g1;TRINITY_DN55_c3_g1;TRINITY_DN55_c8_g1;TRINITY_DN21_c0_g1;TRINITY_DN50_c0_g1;TRINITY_DN98_c1_g4;TRINITY_DN29_c5_g1;TRINITY_DN22_c1_g2;TRINITY_DN76_c0_g4;TRINITY_DN76_c0_g2;TRINITY_DN76_c0_g3;TRINITY_DN28_c0_g2;TRINITY_DN48_c0_g1;TRINITY_DN26_c0_g2;TRINITY_DN192_c0_g4;TRINITY_DN192_c0_g5;TRINITY_DN192_c1_g4;TRINITY_DN125_c3_g1;TRINITY_DN125_c…
Exosome	Protein families: signaling and cellular processes	Brite Hierarchies	508	K10381;K00288;K18261;K17092;K04004;K04346;K04635;K04634;K04542;K07893;K07606;K01278;K06583;K05024;K11295;K04524;K13073;K06823;K01528;K16569;K00088;K05699;K07902;K13738;K06087;K03178;K07887;K06271;K16848;K06275;K15300;K11836;K03231;K07875;K07874;K07941;K17301;K10396;K11253;K01539;K00134;K04639;K08767;K02833;K06485;K03898;K14753;K10138;K04382;K05700;K01623;K16197;K17255;K01205;K18272;K06566;K10089;…	1725	TRINITY_DN39_c1_g2;TRINITY_DN9_c0_g1;TRINITY_DN5_c0_g1;TRINITY_DN78_c12_g1;TRINITY_DN30_c0_g1;TRINITY_DN22_c0_g5;TRINITY_DN22_c0_g1;TRINITY_DN22_c0_g3;TRINITY_DN43_c0_g2;TRINITY_DN1_c1_g1;TRINITY_DN49_c2_g1;TRINITY_DN11_c1_g1;TRINITY_DN67_c0_g1;TRINITY_DN103_c1_g1;TRINITY_DN125_c1_g1;TRINITY_DN132_c0_g2;TRINITY_DN127_c0_g5;TRINITY_DN184_c1_g1;TRINITY_DN122_c1_g1;TRINITY_DN129_c0_g1;TRINITY_DN134_…
Transcription factors	Protein families: genetic information processing	Brite Hierarchies	461	K09189;K09269;K09228;K09106;K05411;K10176;K10489;K19485;K10177;K09186;K15603;K09198;K04498;K09396;K09205;K17895;K09230;K09026;K14960;K09273;K09319;K10048;K10050;K09103;K09108;K09391;K09272;K09173;K16671;K16670;K09229;K09183;K09182;K08066;K18486;K09236;K19486;K09428;K09417;K06053;K05706;K14959;K09215;K09063;K14242;K09187;K09209;K11224;K09402;K09268;K09303;K09233;K03730;K09040;K17846;K15590;K09058;…	1222	TRINITY_DN93_c0_g1;TRINITY_DN92_c0_g1;TRINITY_DN73_c1_g1;TRINITY_DN21_c1_g1;TRINITY_DN15_c0_g1;TRINITY_DN42_c0_g2;TRINITY_DN98_c1_g4;TRINITY_DN44_c0_g1;TRINITY_DN45_c1_g1;TRINITY_DN13_c2_g2;TRINITY_DN13_c2_g1;TRINITY_DN75_c1_g2;TRINITY_DN14_c0_g2;TRINITY_DN14_c1_g1;TRINITY_DN165_c1_g2;TRINITY_DN165_c1_g4;TRINITY_DN159_c2_g1;TRINITY_DN110_c4_g1;TRINITY_DN187_c0_g1;TRINITY_DN248_c0_g1;TRINITY_DN248…
Transporters	Protein families: signaling and cellular processes	Brite Hierarchies	496	K08230;K14686;K12347;K14640;K19364;K08231;K05678;K06316;K12306;K15121;K15287;K15109;K14996;K05742;K00799;K15117;K17906;K15284;K05657;K14684;K15378;K13363;K05648;K05644;K13365;K15112;K05645;K05641;K15113;K08761;K06566;K05655;K15122;K15107;K05665;K05849;K08175;K12307;K15275;K17908;K17907;K06088;K17797;K01551;K13354;K15381;K14427;K13627;K14825;K15085;K15274;K15104;K15377;K13864;K14995;K00720;K15379;…	1107	TRINITY_DN85_c4_g1;TRINITY_DN89_c2_g1;TRINITY_DN83_c1_g1;TRINITY_DN63_c0_g1;TRINITY_DN88_c2_g1;TRINITY_DN76_c0_g5;TRINITY_DN167_c0_g1;TRINITY_DN192_c0_g2;TRINITY_DN106_c0_g1;TRINITY_DN183_c0_g2;TRINITY_DN151_c7_g1;TRINITY_DN168_c2_g1;TRINITY_DN136_c1_g1;TRINITY_DN157_c0_g1;TRINITY_DN243_c0_g1;TRINITY_DN287_c4_g1;TRINITY_DN275_c0_g1;TRINITY_DN270_c0_g2;TRINITY_DN221_c2_g1;TRINITY_DN241_c2_g1;TRINI…
Protein kinases	Protein families: metabolism	Brite Hierarchies	367	K12323;K12077;K16312;K04444;K08831;K08827;K04362;K05094;K05095;K08867;K08880;K08823;K08789;K05086;K04527;K16313;K11479;K00898;K05117;K08271;K08269;K16510;K13302;K00905;K08875;K17548;K08798;K19008;K04416;K04372;K08874;K07298;K04417;K05116;K05120;K04407;K11721;K08877;K08291;K05105;K05103;K05108;K04441;K02208;K08854;K08838;K15596;K14958;K00871;K08861;K05125;K04688;K05854;K06071;K04366;K04423;K04426;…	1042	TRINITY_DN60_c3_g1;TRINITY_DN70_c1_g1;TRINITY_DN70_c2_g1;TRINITY_DN35_c0_g1;TRINITY_DN5_c0_g2;TRINITY_DN81_c0_g1;TRINITY_DN81_c0_g2;TRINITY_DN86_c3_g1;TRINITY_DN86_c3_g3;TRINITY_DN86_c3_g2;TRINITY_DN86_c3_g4;TRINITY_DN86_c1_g1;TRINITY_DN65_c1_g1;TRINITY_DN11_c1_g2;TRINITY_DN99_c0_g1;TRINITY_DN196_c0_g1;TRINITY_DN196_c0_g2;TRINITY_DN164_c0_g1;TRINITY_DN164_c0_g2;TRINITY_DN164_c1_g1;TRINITY_DN115_c…
Peptidases	Protein families: metabolism	Brite Hierarchies	397	K09637;K08574;K11366;K01278;K11855;K11863;K01280;K11853;K11847;K01951;K11836;K09595;K11849;K01265;K09650;K02737;K08584;K01303;K13700;K08629;K04505;K11840;K09596;K09605;K08001;K08671;K11835;K09604;K08956;K01335;K11989;K08955;K18592;K11861;K02731;K07993;K01277;K02741;K11860;K01372;K13704;K06836;K08596;K09597;K01371;K08658;K08625;K11838;K17382;K08673;K00414;K16068;K14358;K02736;K01415;K08635;K02725;…	983	TRINITY_DN86_c8_g1;TRINITY_DN84_c0_g1;TRINITY_DN76_c0_g4;TRINITY_DN76_c0_g2;TRINITY_DN11_c1_g1;TRINITY_DN28_c0_g2;TRINITY_DN192_c0_g4;TRINITY_DN192_c0_g5;TRINITY_DN143_c1_g2;TRINITY_DN162_c0_g1;TRINITY_DN139_c0_g1;TRINITY_DN156_c3_g1;TRINITY_DN227_c0_g1;TRINITY_DN259_c4_g2;TRINITY_DN245_c3_g1;TRINITY_DN395_c0_g2;TRINITY_DN395_c0_g3;TRINITY_DN306_c0_g2;TRINITY_DN357_c0_g1;TRINITY_DN394_c1_g1;TRINI…
Mitochondrial biogenesis	Protein families: genetic information processing	Brite Hierarchies	230	K17776;K10591;K04405;K08337;K02257;K08765;K17725;K04498;K08269;K17906;K04487;K17783;K04082;K09539;K01880;K09650;K15113;K15791;K18170;K02519;K08331;K17656;K01876;K01887;K09504;K13185;K17908;K17907;K17797;K10435;K14527;K18175;K06030;K19523;K17965;K04043;K08900;K02355;K08675;K17800;K09201;K19054;K17890;K17659;K08342;K04725;K15031;K04678;K15041;K17653;K17987;K17785;K07277;K17680;K02333;K17794;K15266;…	982	TRINITY_DN17_c0_g2;TRINITY_DN55_c8_g1;TRINITY_DN89_c0_g2;TRINITY_DN29_c5_g1;TRINITY_DN184_c1_g2;TRINITY_DN123_c0_g1;TRINITY_DN126_c0_g1;TRINITY_DN165_c1_g2;TRINITY_DN194_c0_g2;TRINITY_DN186_c3_g1;TRINITY_DN242_c4_g1;TRINITY_DN270_c0_g1;TRINITY_DN270_c0_g2;TRINITY_DN261_c1_g1;TRINITY_DN352_c1_g1;TRINITY_DN307_c0_g1;TRINITY_DN307_c0_g2;TRINITY_DN335_c0_g1;TRINITY_DN381_c1_g4;TRINITY_DN327_c1_g1;TRI…
Pathways in cancer	Cancers: Overview	Human Diseases	346	K03094;K04737;K04362;K05094;K05095;K06225;K04346;K04635;K04634;K04542;K04358;K05066;K00922;K16060;K04498;K05637;K13377;K00799;K06624;K02432;K04639;K06226;K05636;K00444;K02833;K06485;K10456;K09291;K06067;K13769;K10140;K07861;K04738;K06243;K03096;K06240;K12331;K11224;K04662;K02353;K06625;K04289;K04688;K08737;K04366;K03099;K04630;K12330;K04501;K08878;K05130;K03871;K02620;K04491;K07209;K08773;K08557;…	922	TRINITY_DN85_c0_g1;TRINITY_DN54_c0_g1;TRINITY_DN86_c3_g1;TRINITY_DN86_c3_g3;TRINITY_DN86_c3_g2;TRINITY_DN86_c3_g4;TRINITY_DN86_c1_g1;TRINITY_DN8_c1_g1;TRINITY_DN22_c0_g5;TRINITY_DN22_c0_g1;TRINITY_DN22_c0_g3;TRINITY_DN43_c0_g2;TRINITY_DN153_c1_g1;TRINITY_DN138_c0_g1;TRINITY_DN152_c0_g2;TRINITY_DN111_c2_g1;TRINITY_DN165_c1_g2;TRINITY_DN148_c0_g1;TRINITY_DN156_c1_g2;TRINITY_DN243_c0_g1;TRINITY_DN28…
Endocytosis	Transport and catabolism	Cellular Processes	152	K12471;K10591;K17920;K05094;K05095;K05758;K12473;K12495;K01528;K00889;K07887;K07941;K10396;K02833;K05757;K11825;K19476;K04705;K12478;K12487;K08291;K05754;K12186;K06093;K06564;K05737;K10364;K12493;K18442;K10365;K06069;K17917;K12494;K12472;K11824;K12184;K07904;K04500;K04678;K12489;K12182;K07937;K01115;K12483;K12476;K04393;K18466;K07938;K12197;K12492;K00910;K04439;K19366;K12474;K15053;K12196;K04674;…	915	TRINITY_DN17_c0_g1;TRINITY_DN55_c8_g1;TRINITY_DN78_c0_g2;TRINITY_DN86_c3_g2;TRINITY_DN86_c1_g1;TRINITY_DN56_c2_g2;TRINITY_DN192_c2_g1;TRINITY_DN112_c0_g1;TRINITY_DN122_c1_g1;TRINITY_DN176_c2_g2;TRINITY_DN194_c0_g2;TRINITY_DN124_c0_g1;TRINITY_DN186_c3_g1;TRINITY_DN242_c4_g1;TRINITY_DN284_c0_g1;TRINITY_DN297_c0_g1;TRINITY_DN203_c0_g3;TRINITY_DN331_c0_g1;TRINITY_DN381_c1_g4;TRINITY_DN316_c0_g1;TRINI…
Messenger RNA biogenesis	Protein families: genetic information processing	Brite Hierarchies	267	K00850;K14589;K07606;K14326;K18422;K14304;K05925;K05749;K14321;K14443;K12599;K12883;K15172;K03231;K18681;K03253;K14753;K12580;K09291;K12604;K14401;K14323;K13088;K18753;K18757;K12741;K11593;K12597;K13201;K12603;K12617;K18756;K18743;K12879;K14303;K13197;K15308;K14408;K17265;K12877;K03678;K13126;K14651;K06100;K12626;K18647;K03257;K13174;K12606;K12875;K13218;K18740;K04043;K11407;K14311;K03685;K14322;…	914	TRINITY_DN20_c0_g1;TRINITY_DN20_c0_g2;TRINITY_DN20_c0_g3;TRINITY_DN6_c0_g1;TRINITY_DN49_c2_g1;TRINITY_DN14_c0_g1;TRINITY_DN23_c2_g1;TRINITY_DN125_c0_g1;TRINITY_DN125_c14_g1;TRINITY_DN132_c0_g1;TRINITY_DN134_c1_g1;TRINITY_DN111_c12_g1;TRINITY_DN140_c1_g1;TRINITY_DN176_c4_g1;TRINITY_DN114_c1_g1;TRINITY_DN209_c0_g2;TRINITY_DN238_c0_g1;TRINITY_DN258_c2_g1;TRINITY_DN254_c1_g1;TRINITY_DN297_c3_g1;TRINI…
Cytoskeleton proteins	Protein families: signaling and cellular processes	Brite Hierarchies	246	K10381;K12641;K07611;K18597;K05758;K07606;K16569;K05699;K10426;K16848;K06275;K10429;K18622;K10396;K17456;K10366;K16547;K10420;K10433;K05700;K05757;K10370;K08798;K18595;K17455;K10424;K13887;K05754;K10358;K07604;K17914;K06107;K10364;K16942;K05748;K10402;K11662;K10361;K10392;K10365;K10425;K10435;K07605;K05701;K05767;K04557;K16606;K10356;K16611;K10407;K07767;K17493;K07610;K16939;K10399;K17551;K12043;…	900	TRINITY_DN39_c1_g2;TRINITY_DN74_c0_g1;TRINITY_DN74_c0_g2;TRINITY_DN74_c0_g3;TRINITY_DN50_c3_g1;TRINITY_DN56_c2_g2;TRINITY_DN49_c2_g1;TRINITY_DN129_c0_g1;TRINITY_DN151_c6_g1;TRINITY_DN159_c0_g1;TRINITY_DN181_c0_g1;TRINITY_DN136_c5_g1;TRINITY_DN100_c1_g1;TRINITY_DN200_c0_g1;TRINITY_DN297_c0_g1;TRINITY_DN275_c1_g2;TRINITY_DN205_c2_g1;TRINITY_DN218_c0_g1;TRINITY_DN281_c1_g1;TRINITY_DN378_c2_g1;TRINIT…
Protein phosphatases and associated proteins	Protein families: metabolism	Brite Hierarchies	273	K15498;K00850;K18025;K07817;K08867;K06645;K06270;K18080;K07758;K17560;K11479;K17491;K05742;K10429;K15728;K04354;K04960;K04461;K11584;K15499;K17553;K14165;K11583;K04459;K18498;K04382;K15424;K17500;K18024;K17582;K03353;K04256;K17503;K18085;K17581;K17601;K17494;K06088;K11446;K08889;K17507;K14019;K15425;K13099;K18036;K18081;K11407;K07207;K17618;K03456;K17557;K17584;K02374;K10356;K17569;K17554;K17493;…	859	TRINITY_DN39_c1_g1;TRINITY_DN20_c0_g1;TRINITY_DN20_c0_g2;TRINITY_DN20_c0_g3;TRINITY_DN10_c0_g1;TRINITY_DN10_c0_g2;TRINITY_DN10_c1_g1;TRINITY_DN65_c1_g1;TRINITY_DN0_c28_g2;TRINITY_DN1_c0_g1;TRINITY_DN96_c0_g1;TRINITY_DN120_c2_g1;TRINITY_DN184_c2_g1;TRINITY_DN183_c1_g1;TRINITY_DN188_c7_g1;TRINITY_DN176_c4_g1;TRINITY_DN157_c0_g1;TRINITY_DN100_c1_g1;TRINITY_DN197_c1_g1;TRINITY_DN191_c2_g1;TRINITY_DN2…
Epstein-Barr virus infection	Infectious diseases: Viral	Human Diseases	131	K03010;K10591;K05411;K12646;K03037;K07606;K03124;K00922;K04498;K03036;K04404;K06624;K03026;K06067;K16197;K03115;K06053;K03039;K04441;K06625;K03031;K05854;K06065;K03022;K11838;K06063;K03006;K07209;K04377;K04456;K03016;K04403;K04427;K16196;K05410;K03137;K09849;K03029;K04431;K03028;K14290;K16198;K03120;K11219;K09253;K04440;K02206;K15978;K04734;K11218;K02580;K03173;K07210;K04469;K07936;K03024;K03038;…	772	TRINITY_DN55_c3_g2;TRINITY_DN55_c8_g1;TRINITY_DN15_c0_g1;TRINITY_DN45_c0_g1;TRINITY_DN49_c0_g2;TRINITY_DN49_c2_g1;TRINITY_DN23_c5_g1;TRINITY_DN152_c0_g2;TRINITY_DN165_c1_g2;TRINITY_DN176_c1_g3;TRINITY_DN194_c0_g2;TRINITY_DN186_c3_g1;TRINITY_DN100_c0_g1;TRINITY_DN242_c4_g1;TRINITY_DN201_c0_g1;TRINITY_DN307_c1_g1;TRINITY_DN307_c2_g1;TRINITY_DN381_c1_g4;TRINITY_DN306_c1_g1;TRINITY_DN332_c0_g1;TRINIT…
Ubiquitin mediated proteolysis	Folding, sorting and degradation	Genetic Information Processing	112	K03094;K10591;K10615;K10684;K16060;K03178;K10698;K10585;K10593;K10456;K10140;K03351;K10685;K03362;K10575;K04416;K03353;K07868;K10613;K03352;K06689;K03348;K03871;K16063;K02207;K04725;K04678;K10592;K10574;K10598;K10686;K04506;K05630;K04706;K10577;K04649;K03869;K10604;K10260;K10590;K10609;K10610;K10264;K10699;K10054;K10582;K10578;K03347;K10143;K10606;K10595;K10447;K03364;K04696;K10586;K03349;K10596;…	746	TRINITY_DN85_c0_g1;TRINITY_DN55_c8_g1;TRINITY_DN105_c5_g1;TRINITY_DN115_c1_g3;TRINITY_DN111_c2_g1;TRINITY_DN194_c0_g2;TRINITY_DN145_c0_g1;TRINITY_DN145_c1_g1;TRINITY_DN186_c3_g1;TRINITY_DN242_c4_g1;TRINITY_DN244_c0_g2;TRINITY_DN222_c0_g1;TRINITY_DN222_c0_g2;TRINITY_DN264_c2_g2;TRINITY_DN352_c0_g2;TRINITY_DN346_c1_g1;TRINITY_DN367_c3_g1;TRINITY_DN381_c1_g4;TRINITY_DN363_c1_g1;TRINITY_DN332_c1_g1;T…
Spliceosome	Transcription	Genetic Information Processing	279	K13187;K13100;K08831;K08827;K13180;K13166;K08823;K12839;K12896;K13044;K13209;K13184;K12883;K14945;K14948;K11091;K02516;K12834;K11087;K13178;K11092;K13207;K13125;K13179;K13088;K12820;K12741;K12837;K13201;K12855;K13167;K11097;K13129;K12879;K12884;K13197;K12887;K12898;K13159;K12877;K13194;K13191;K13214;K13126;K12888;K12734;K13195;K12824;K12858;K12626;K13185;K12870;K12890;K13096;K12885;K12836;K13131;…	731	TRINITY_DN85_c2_g1;TRINITY_DN74_c1_g1;TRINITY_DN5_c0_g2;TRINITY_DN81_c0_g1;TRINITY_DN81_c0_g2;TRINITY_DN29_c2_g1;TRINITY_DN0_c1_g1;TRINITY_DN99_c0_g1;TRINITY_DN150_c1_g1;TRINITY_DN111_c0_g1;TRINITY_DN165_c0_g2;TRINITY_DN176_c0_g1;TRINITY_DN179_c0_g1;TRINITY_DN209_c0_g2;TRINITY_DN219_c1_g2;TRINITY_DN200_c4_g1;TRINITY_DN291_c1_g1;TRINITY_DN204_c0_g1;TRINITY_DN257_c2_g1;TRINITY_DN262_c1_g1;TRINITY_D…
Spliceosome	Protein families: genetic information processing	Brite Hierarchies	279	K13187;K13100;K08831;K08827;K13180;K13166;K08823;K12839;K12896;K13044;K13209;K13184;K12883;K14945;K14948;K11091;K02516;K12834;K11087;K13178;K11092;K13207;K13125;K13179;K13088;K12820;K12741;K12837;K13201;K12855;K13167;K11097;K13129;K12879;K12884;K13197;K12887;K12898;K13159;K12877;K13194;K13191;K13214;K13126;K12888;K12734;K13195;K12824;K12858;K12626;K13185;K12870;K12890;K13096;K12885;K12836;K13131;…	731	TRINITY_DN85_c2_g1;TRINITY_DN74_c1_g1;TRINITY_DN5_c0_g2;TRINITY_DN81_c0_g1;TRINITY_DN81_c0_g2;TRINITY_DN29_c2_g1;TRINITY_DN0_c1_g1;TRINITY_DN99_c0_g1;TRINITY_DN150_c1_g1;TRINITY_DN111_c0_g1;TRINITY_DN165_c0_g2;TRINITY_DN176_c0_g1;TRINITY_DN179_c0_g1;TRINITY_DN209_c0_g2;TRINITY_DN219_c1_g2;TRINITY_DN200_c4_g1;TRINITY_DN291_c1_g1;TRINITY_DN204_c0_g1;TRINITY_DN257_c2_g1;TRINITY_DN262_c1_g1;TRINITY_D…
Tight junction	Cellular community - eukaryotes	Cellular Processes	87	K10591;K05699;K07902;K06087;K04354;K06094;K04382;K06735;K09183;K13365;K04416;K05631;K07298;K06093;K06100;K04426;K16175;K06088;K04802;K06069;K05701;K03456;K06090;K06448;K06104;K04431;K02089;K06099;K04353;K12757;K05731;K04393;K17388;K18584;K04392;K16819;K04440;K18050;K17260;K05747;K10352;K06785;K05762;K16684;K04514;K05702;K12755;K12791;K12075;K07374;K06274;K05083;K08367;K04851;K06106;K06092;K06095;…	699	TRINITY_DN55_c8_g1;TRINITY_DN151_c6_g1;TRINITY_DN163_c1_g1;TRINITY_DN194_c0_g2;TRINITY_DN110_c0_g1;TRINITY_DN186_c3_g1;TRINITY_DN191_c2_g1;TRINITY_DN242_c4_g1;TRINITY_DN214_c0_g1;TRINITY_DN387_c2_g1;TRINITY_DN381_c1_g4;TRINITY_DN370_c1_g1;TRINITY_DN319_c0_g1;TRINITY_DN315_c0_g2;TRINITY_DN348_c4_g1;TRINITY_DN333_c0_g1;TRINITY_DN344_c0_g1;TRINITY_DN372_c13_g1;TRINITY_DN426_c0_g4;TRINITY_DN452_c0_g1…
Human papillomavirus infection	Infectious diseases: Viral	Human Diseases	205	K05411;K06583;K00922;K04498;K06061;K05637;K04354;K06094;K11584;K06624;K02432;K05636;K00444;K11583;K02833;K06485;K04382;K11404;K06067;K06588;K06243;K06252;K13365;K05631;K06053;K06240;K04505;K06484;K02353;K06236;K06093;K06625;K04688;K04366;K03099;K18671;K16175;K02149;K05130;K06069;K02154;K06238;K02620;K11408;K04491;K11407;K07207;K07209;K06237;K03456;K04456;K03661;K16857;K06090;K05410;K02147;K02187;…	673	TRINITY_DN15_c0_g1;TRINITY_DN67_c0_g1;TRINITY_DN152_c0_g2;TRINITY_DN165_c1_g2;TRINITY_DN165_c1_g1;TRINITY_DN148_c0_g1;TRINITY_DN191_c2_g1;TRINITY_DN214_c0_g1;TRINITY_DN202_c1_g1;TRINITY_DN202_c0_g1;TRINITY_DN201_c0_g1;TRINITY_DN240_c0_g1;TRINITY_DN221_c0_g1;TRINITY_DN217_c11_g1;TRINITY_DN217_c0_g3;TRINITY_DN217_c2_g1;TRINITY_DN203_c0_g3;TRINITY_DN264_c1_g1;TRINITY_DN387_c2_g1;TRINITY_DN329_c0_g1;…
DNA repair and recombination proteins	Protein families: genetic information processing	Brite Hierarchies	247	K15498;K03010;K10801;K06645;K17491;K15499;K10140;K15424;K02324;K16197;K10894;K03512;K10874;K10886;K10873;K19025;K10882;K10841;K10867;K02331;K10887;K08737;K03165;K10902;K10876;K10849;K10904;K08857;K19528;K11137;K04802;K15425;K03006;K02633;K10840;K03016;K10993;K10754;K02830;K02327;K16198;K10574;K11864;K10888;K19023;K15078;K10895;K15361;K03511;K10990;K15423;K10901;K08862;K03869;K10747;K03660;K10843;…	624	TRINITY_DN39_c1_g1;TRINITY_DN55_c3_g2;TRINITY_DN55_c2_g2;TRINITY_DN0_c28_g2;TRINITY_DN188_c7_g1;TRINITY_DN258_c1_g1;TRINITY_DN346_c1_g1;TRINITY_DN381_c0_g1;TRINITY_DN326_c0_g1;TRINITY_DN306_c1_g1;TRINITY_DN322_c7_g1;TRINITY_DN498_c0_g2;TRINITY_DN465_c1_g1;TRINITY_DN491_c2_g1;TRINITY_DN494_c9_g1;TRINITY_DN469_c0_g2;TRINITY_DN472_c0_g3;TRINITY_DN402_c1_g1;TRINITY_DN503_c1_g2;TRINITY_DN517_c0_g1;TRI…
PI3K-Akt signaling pathway	Signal transduction	Environmental Information Processing	217	K04737;K04362;K05094;K05095;K04542;K06583;K04358;K04527;K00922;K05637;K04354;K11584;K06624;K05636;K11583;K02833;K06485;K13302;K04382;K13769;K06588;K16837;K06243;K16197;K06252;K05631;K07298;K06240;K06484;K05103;K06236;K06625;K04289;K04688;K06071;K04366;K03099;K06276;K05130;K06238;K00693;K07207;K07209;K06237;K03456;K04377;K04456;K16857;K05454;K09784;K16333;K02089;K16198;K04368;K04369;K08774;K09048;…	610	TRINITY_DN54_c0_g1;TRINITY_DN86_c3_g1;TRINITY_DN86_c3_g3;TRINITY_DN86_c3_g2;TRINITY_DN86_c3_g4;TRINITY_DN86_c1_g1;TRINITY_DN43_c0_g2;TRINITY_DN67_c0_g1;TRINITY_DN153_c1_g1;TRINITY_DN164_c1_g1;TRINITY_DN152_c0_g2;TRINITY_DN148_c0_g1;TRINITY_DN191_c2_g1;TRINITY_DN202_c1_g1;TRINITY_DN202_c0_g1;TRINITY_DN201_c0_g1;TRINITY_DN221_c0_g1;TRINITY_DN217_c2_g1;TRINITY_DN203_c0_g3;TRINITY_DN264_c1_g1;TRINITY…
Transcription machinery	Protein families: genetic information processing	Brite Hierarchies	188	K03010;K15181;K15162;K15214;K11366;K15176;K03124;K15184;K15144;K11650;K15201;K15146;K15172;K09273;K03127;K06062;K03026;K14401;K11654;K08874;K13167;K11314;K11647;K11363;K02208;K11292;K11340;K13191;K15182;K11653;K14651;K06100;K03022;K03139;K15196;K14535;K17494;K03134;K11367;K15167;K15212;K11649;K11757;K03006;K11318;K11310;K15211;K15195;K12619;K15137;K03016;K15544;K15200;K03137;K03125;K14400;K17498;…	543	TRINITY_DN55_c3_g2;TRINITY_DN37_c0_g1;TRINITY_DN62_c0_g1;TRINITY_DN2_c0_g1;TRINITY_DN2_c0_g2;TRINITY_DN76_c0_g4;TRINITY_DN76_c11_g1;TRINITY_DN76_c0_g2;TRINITY_DN23_c5_g1;TRINITY_DN180_c0_g2;TRINITY_DN133_c1_g2;TRINITY_DN178_c1_g1;TRINITY_DN206_c0_g1;TRINITY_DN206_c1_g1;TRINITY_DN219_c2_g1;TRINITY_DN238_c0_g1;TRINITY_DN259_c2_g1;TRINITY_DN293_c4_g1;TRINITY_DN233_c0_g1;TRINITY_DN307_c1_g1;TRINITY_D…
MAPK signaling pathway	Signal transduction	Environmental Information Processing	199	K04405;K04444;K04362;K05094;K05095;K04346;K04358;K04436;K04527;K04404;K13377;K04461;K16510;K04459;K18498;K02833;K13769;K07861;K04416;K04372;K04407;K04855;K05103;K04441;K04352;K04383;K04366;K04423;K03099;K04426;K04421;K07209;K04377;K04456;K05454;K04403;K04427;K09784;K04854;K04410;K04431;K02187;K07836;K04353;K04446;K04368;K04369;K08774;K04428;K04419;K04348;K04393;K04392;K04437;K09253;K05449;K05089;…	530	TRINITY_DN89_c0_g2;TRINITY_DN35_c0_g1;TRINITY_DN86_c3_g1;TRINITY_DN86_c3_g3;TRINITY_DN86_c3_g2;TRINITY_DN86_c3_g4;TRINITY_DN86_c1_g1;TRINITY_DN22_c0_g5;TRINITY_DN153_c1_g1;TRINITY_DN143_c0_g1;TRINITY_DN164_c1_g1;TRINITY_DN100_c0_g1;TRINITY_DN156_c1_g2;TRINITY_DN242_c2_g1;TRINITY_DN261_c0_g1;TRINITY_DN203_c0_g1;TRINITY_DN203_c0_g2;TRINITY_DN203_c0_g3;TRINITY_DN314_c1_g1;TRINITY_DN367_c0_g1;TRINITY…
CD molecules	Protein families: signaling and cellular processes	Brite Hierarchies	259	K04737;K04362;K05094;K05095;K04550;K05062;K01278;K06719;K04527;K05066;K06548;K06485;K06735;K04738;K06512;K04722;K06484;K06578;K06564;K05125;K18592;K06537;K06529;K06729;K06557;K06715;K06558;K01540;K06521;K04182;K08446;K06448;K06519;K01513;K06702;K06549;K05060;K06528;K06542;K05681;K06592;K06509;K06267;K05089;K05090;K04363;K06736;K06560;K05093;K06539;K06462;K05164;K06499;K05689;K06493;K06481;K06745;…	523	TRINITY_DN54_c0_g1;TRINITY_DN86_c3_g1;TRINITY_DN86_c3_g3;TRINITY_DN86_c3_g2;TRINITY_DN86_c3_g4;TRINITY_DN86_c1_g1;TRINITY_DN98_c1_g1;TRINITY_DN13_c0_g1;TRINITY_DN11_c1_g1;TRINITY_DN127_c0_g4;TRINITY_DN164_c1_g1;TRINITY_DN138_c0_g1;TRINITY_DN219_c3_g1;TRINITY_DN264_c1_g1;TRINITY_DN370_c1_g1;TRINITY_DN364_c0_g1;TRINITY_DN353_c0_g2;TRINITY_DN455_c2_g1;TRINITY_DN459_c0_g1;TRINITY_DN428_c4_g1;TRINITY_…
Human T-cell leukemia virus 1 infection	Infectious diseases: Viral	Human Diseases	184	K00922;K08057;K04498;K15304;K06271;K13377;K15310;K02432;K00444;K02833;K06062;K15305;K03351;K02324;K04416;K08874;K09063;K03353;K15308;K11224;K02353;K06625;K03352;K04501;K04802;K04421;K03348;K07209;K00787;K15307;K04377;K04456;K08046;K08045;K06635;K03159;K11304;K04725;K02327;K04500;K16333;K15041;K02089;K14290;K04446;K03120;K04348;K04685;K08044;K06622;K09253;K05089;K09052;K04674;K04363;K06752;K09027;…	472	TRINITY_DN152_c0_g2;TRINITY_DN195_c0_g1;TRINITY_DN165_c1_g2;TRINITY_DN114_c0_g2;TRINITY_DN121_c0_g1;TRINITY_DN156_c1_g2;TRINITY_DN238_c1_g1;TRINITY_DN240_c0_g1;TRINITY_DN217_c11_g1;TRINITY_DN217_c0_g3;TRINITY_DN203_c0_g3;TRINITY_DN233_c0_g1;TRINITY_DN337_c1_g1;TRINITY_DN367_c3_g1;TRINITY_DN326_c0_g1;TRINITY_DN333_c0_g1;TRINITY_DN344_c1_g1;TRINITY_DN460_c0_g1;TRINITY_DN434_c1_g1;TRINITY_DN461_c0_g…
MAPK signaling pathway - yeast	Signal transduction	Environmental Information Processing	17	K10591;K00888;K00889;K02516;K04441;K09448;K06276;K04393;K04536;K04409;K06630;K00006;K15174;K04371;K03781;K04513;K02677	465	TRINITY_DN55_c8_g1;TRINITY_DN49_c0_g1;TRINITY_DN176_c2_g2;TRINITY_DN194_c0_g2;TRINITY_DN186_c3_g1;TRINITY_DN242_c4_g1;TRINITY_DN285_c0_g1;TRINITY_DN204_c0_g1;TRINITY_DN331_c0_g1;TRINITY_DN381_c1_g4;TRINITY_DN348_c4_g1;TRINITY_DN344_c0_g1;TRINITY_DN426_c0_g4;TRINITY_DN452_c3_g1;TRINITY_DN492_c1_g2;TRINITY_DN538_c1_g1;TRINITY_DN510_c1_g1;TRINITY_DN586_c0_g4;TRINITY_DN598_c2_g1;TRINITY_DN661_c2_g1;T…
Ribosome	Translation	Genetic Information Processing	152	K02964;K02963;K02926;K02930;K02993;K02943;K02905;K02900;K02939;K02918;K02923;K02973;K17410;K02998;K02988;K02927;K02934;K17434;K02951;K02920;K17402;K02906;K02946;K02868;K02960;K17418;K17433;K02910;K02885;K02887;K02889;K02995;K02997;K02966;K02864;K02942;K02959;K17424;K02937;K02979;K02882;K02913;K17421;K02949;K02876;K02873;K02996;K02922;K02896;K02903;K02891;K02917;K02865;K02953;K17422;K17408;K17419;…	459	TRINITY_DN0_c5_g1;TRINITY_DN23_c1_g1;TRINITY_DN158_c0_g1;TRINITY_DN228_c0_g2;TRINITY_DN228_c0_g3;TRINITY_DN267_c1_g1;TRINITY_DN352_c0_g1;TRINITY_DN392_c1_g2;TRINITY_DN432_c0_g1;TRINITY_DN432_c0_g3;TRINITY_DN411_c2_g1;TRINITY_DN572_c2_g2;TRINITY_DN572_c2_g1;TRINITY_DN663_c0_g3;TRINITY_DN606_c0_g1;TRINITY_DN713_c1_g1;TRINITY_DN760_c2_g1;TRINITY_DN729_c1_g1;TRINITY_DN727_c0_g1;TRINITY_DN883_c0_g1;TR…
Ribosome	Protein families: genetic information processing	Brite Hierarchies	152	K02964;K02963;K02926;K02930;K02993;K02943;K02905;K02900;K02939;K02918;K02923;K02973;K17410;K02998;K02988;K02927;K02934;K17434;K02951;K02920;K17402;K02906;K02946;K02868;K02960;K17418;K17433;K02910;K02885;K02887;K02889;K02995;K02997;K02966;K02864;K02942;K02959;K17424;K02937;K02979;K02882;K02913;K17421;K02949;K02876;K02873;K02996;K02922;K02896;K02903;K02891;K02917;K02865;K02953;K17422;K17408;K17419;…	459	TRINITY_DN0_c5_g1;TRINITY_DN23_c1_g1;TRINITY_DN158_c0_g1;TRINITY_DN228_c0_g2;TRINITY_DN228_c0_g3;TRINITY_DN267_c1_g1;TRINITY_DN352_c0_g1;TRINITY_DN392_c1_g2;TRINITY_DN432_c0_g1;TRINITY_DN432_c0_g3;TRINITY_DN411_c2_g1;TRINITY_DN572_c2_g2;TRINITY_DN572_c2_g1;TRINITY_DN663_c0_g3;TRINITY_DN606_c0_g1;TRINITY_DN713_c1_g1;TRINITY_DN760_c2_g1;TRINITY_DN729_c1_g1;TRINITY_DN727_c0_g1;TRINITY_DN883_c0_g1;TR…
Enzymes with EC numbers	Unclassified: metabolism	Not Included in Pathway or Brite	157	K14951;K14662;K01530;K15720;K14950;K10768;K00774;K18932;K18208;K11162;K11995;K18665;K13526;K11169;K00809;K07766;K06072;K10765;K00277;K01025;K14395;K03424;K15258;K06711;K18458;K00671;K15537;K13291;K18772;K01112;K07305;K13981;K15538;K01974;K14607;K07588;K13374;K13619;K00327;K19511;K14643;K00344;K01537;K11173;K12310;K17757;K11390;K12375;K19284;K01462;K16813;K13949;K15259;K01481;K00311;K15261;K08077;…	458	TRINITY_DN75_c1_g1;TRINITY_DN176_c2_g1;TRINITY_DN271_c1_g1;TRINITY_DN252_c0_g1;TRINITY_DN225_c0_g1;TRINITY_DN266_c0_g1;TRINITY_DN220_c3_g1;TRINITY_DN334_c0_g1;TRINITY_DN363_c0_g1;TRINITY_DN435_c1_g3;TRINITY_DN491_c1_g1;TRINITY_DN454_c0_g1;TRINITY_DN468_c0_g3;TRINITY_DN566_c0_g3;TRINITY_DN633_c1_g2;TRINITY_DN633_c1_g1;TRINITY_DN657_c0_g1;TRINITY_DN779_c1_g1;TRINITY_DN792_c1_g2;TRINITY_DN753_c1_g1;…
Focal adhesion	Cellular community - eukaryotes	Cellular Processes	131	K13709;K06270;K06583;K06279;K17447;K00922;K16060;K05699;K05637;K06271;K06275;K05636;K02833;K06485;K05700;K07861;K06588;K06243;K06252;K06277;K06240;K06484;K06236;K04366;K03099;K06276;K06238;K06237;K04456;K16857;K04410;K04725;K07836;K04353;K12757;K04368;K04393;K17388;K04392;K05733;K04437;K05449;K05089;K04440;K04363;K05760;K06247;K05448;K01110;K06493;K06481;K04409;K05730;K04359;K05097;K02161;K04514;…	450	TRINITY_DN97_c2_g1;TRINITY_DN1_c0_g1;TRINITY_DN67_c0_g1;TRINITY_DN25_c0_g1;TRINITY_DN25_c0_g2;TRINITY_DN152_c0_g2;TRINITY_DN111_c2_g1;TRINITY_DN151_c6_g1;TRINITY_DN148_c0_g1;TRINITY_DN121_c0_g1;TRINITY_DN136_c5_g1;TRINITY_DN221_c0_g1;TRINITY_DN203_c0_g3;TRINITY_DN264_c2_g2;TRINITY_DN264_c1_g1;TRINITY_DN336_c0_g1;TRINITY_DN367_c0_g1;TRINITY_DN316_c2_g3;TRINITY_DN321_c0_g1;TRINITY_DN324_c0_g1;TRINI…
Ribosome biogenesis	Protein families: genetic information processing	Brite Hierarchies	207	K14787;K14824;K14822;K14545;K14827;K14841;K14554;K14792;K11884;K14799;K14568;K13179;K12820;K03115;K14570;K14832;K16912;K18329;K12579;K14798;K06947;K14833;K14537;K14538;K14527;K11131;K14777;K14825;K14779;K14765;K03685;K18328;K06943;K12619;K12823;K14863;K14548;K14771;K14521;K14831;K14290;K03979;K18752;K14815;K14785;K15266;K14859;K08593;K14556;K14805;K14861;K14553;K11130;K14808;K15263;K14293;K03538;…	446	TRINITY_DN74_c2_g1;TRINITY_DN11_c0_g1;TRINITY_DN120_c11_g1;TRINITY_DN161_c0_g1;TRINITY_DN183_c0_g1;TRINITY_DN148_c1_g1;TRINITY_DN169_c1_g1;TRINITY_DN113_c0_g1;TRINITY_DN250_c0_g2;TRINITY_DN237_c0_g3;TRINITY_DN317_c0_g1;TRINITY_DN354_c2_g1;TRINITY_DN327_c0_g1;TRINITY_DN332_c0_g1;TRINITY_DN325_c0_g1;TRINITY_DN484_c0_g1;TRINITY_DN441_c0_g1;TRINITY_DN485_c3_g1;TRINITY_DN400_c0_g5;TRINITY_DN400_c0_g1;…
Ion channels	Protein families: signaling and cellular processes	Brite Hierarchies	221	K04986;K04992;K05015;K05024;K04909;K04905;K04960;K04963;K04885;K04889;K04890;K04898;K04917;K04812;K04975;K04855;K05199;K04848;K04914;K04854;K15041;K04827;K19496;K04929;K04900;K04840;K05021;K04970;K04852;K16890;K05214;K04959;K15040;K04966;K05218;K19499;K16057;K16058;K04859;K16896;K04945;K04942;K04845;K04825;K04894;K05212;K05211;K05007;K05012;K04344;K05204;K05198;K04849;K19503;K04851;K04958;K04882;…	446	TRINITY_DN62_c2_g1;TRINITY_DN94_c0_g1;TRINITY_DN87_c0_g4;TRINITY_DN87_c0_g1;TRINITY_DN87_c0_g2;TRINITY_DN103_c1_g1;TRINITY_DN101_c1_g1;TRINITY_DN101_c0_g1;TRINITY_DN296_c3_g1;TRINITY_DN258_c7_g1;TRINITY_DN234_c1_g1;TRINITY_DN234_c0_g1;TRINITY_DN234_c0_g2;TRINITY_DN380_c1_g1;TRINITY_DN318_c0_g1;TRINITY_DN467_c0_g1;TRINITY_DN406_c0_g1;TRINITY_DN458_c2_g1;TRINITY_DN455_c0_g1;TRINITY_DN501_c3_g1;TRIN…
Chaperones and folding catalysts	Protein families: genetic information processing	Brite Hierarchies	175	K09550;K09568;K05864;K01280;K08057;K12740;K04082;K09539;K09508;K09549;K14242;K08671;K09502;K08956;K09498;K09504;K12734;K03671;K03544;K12373;K01371;K09537;K09505;K08673;K09512;K04043;K09540;K09493;K09525;K09528;K10598;K09524;K09580;K09582;K09556;K09533;K09581;K09511;K12739;K13984;K09553;K09523;K09258;K09576;K08056;K03767;K09515;K09538;K19371;K09570;K09586;K08134;K17478;K19372;K09584;K04079;K08879;…	443	TRINITY_DN52_c0_g1;TRINITY_DN76_c0_g1;TRINITY_DN180_c1_g1;TRINITY_DN143_c1_g2;TRINITY_DN195_c0_g1;TRINITY_DN169_c0_g1;TRINITY_DN307_c0_g1;TRINITY_DN307_c0_g2;TRINITY_DN335_c0_g1;TRINITY_DN381_c3_g1;TRINITY_DN315_c0_g1;TRINITY_DN305_c0_g1;TRINITY_DN491_c0_g1;TRINITY_DN463_c1_g1;TRINITY_DN485_c0_g1;TRINITY_DN428_c3_g1;TRINITY_DN533_c1_g1;TRINITY_DN520_c4_g1;TRINITY_DN572_c6_g1;TRINITY_DN644_c1_g1;T…
Regulation of actin cytoskeleton	Cell motility	Cellular Processes	137	K04362;K05094;K05095;K05758;K04346;K06270;K06583;K04358;K05749;K05086;K00922;K05699;K00889;K16848;K05742;K04639;K02833;K06485;K05720;K05700;K07861;K05757;K06588;K00920;K06484;K05754;K04289;K05737;K05627;K05748;K04366;K03099;K12330;K05767;K04410;K12757;K04368;K04369;K05731;K04393;K17388;K04392;K05733;K05089;K04363;K05760;K18497;K05093;K06462;K06493;K06481;K05747;K04409;K07827;K05730;K04359;K05762;…	436	TRINITY_DN86_c3_g1;TRINITY_DN86_c3_g3;TRINITY_DN86_c3_g2;TRINITY_DN86_c3_g4;TRINITY_DN86_c1_g1;TRINITY_DN56_c2_g2;TRINITY_DN22_c0_g5;TRINITY_DN1_c0_g1;TRINITY_DN67_c0_g1;TRINITY_DN153_c1_g1;TRINITY_DN132_c0_g1;TRINITY_DN164_c0_g1;TRINITY_DN164_c0_g2;TRINITY_DN152_c0_g2;TRINITY_DN151_c6_g1;TRINITY_DN176_c2_g2;TRINITY_DN181_c0_g1;TRINITY_DN157_c0_g1;TRINITY_DN251_c9_g1;TRINITY_DN203_c0_g3;TRINITY_D…
G protein-coupled receptors	Protein families: signaling and cellular processes	Brite Hierarchies	255	K04615;K04309;K02432;K06226;K04278;K04600;K04185;K04626;K04292;K04256;K08439;K04289;K06715;K08458;K04601;K04182;K04297;K08453;K08446;K04296;K08465;K08457;K08427;K04301;K04300;K04272;K08467;K04577;K08451;K04592;K04593;K04245;K04147;K04248;K04143;K08417;K04306;K04257;K04186;K08448;K04173;K08463;K08437;K04274;K04290;K04589;K04229;K08449;K08399;K04197;K08440;K04594;K04171;K04009;K04174;K04275;K04304;…	427	TRINITY_DN48_c1_g1;TRINITY_DN216_c1_g1;TRINITY_DN240_c0_g1;TRINITY_DN263_c2_g1;TRINITY_DN204_c1_g1;TRINITY_DN301_c0_g1;TRINITY_DN365_c0_g2;TRINITY_DN373_c0_g1;TRINITY_DN465_c4_g1;TRINITY_DN490_c1_g2;TRINITY_DN504_c1_g3;TRINITY_DN504_c1_g1;TRINITY_DN566_c0_g1;TRINITY_DN861_c2_g2;TRINITY_DN861_c2_g1;TRINITY_DN972_c0_g1;TRINITY_DN964_c0_g1;TRINITY_DN949_c1_g1;TRINITY_DN1035_c0_g1;TRINITY_DN1058_c1_g…
Proteoglycans in cancer	Cancers: Overview	Human Diseases	143	K04362;K06225;K06270;K00922;K16867;K16848;K05742;K04960;K02432;K06226;K00444;K02833;K09108;K13769;K06588;K06484;K04441;K06625;K11989;K04688;K04366;K03099;K12330;K06276;K03685;K04377;K04456;K04660;K12823;K06255;K16857;K01398;K02187;K07293;K04368;K04369;K05731;K04393;K17388;K04392;K04437;K05760;K18497;K05448;K07964;K06493;K06481;K04959;K16865;K04409;K07827;K04515;K05762;K04514;K01365;K09295;K02649;…	426	TRINITY_DN86_c3_g1;TRINITY_DN86_c3_g3;TRINITY_DN86_c3_g4;TRINITY_DN8_c1_g1;TRINITY_DN1_c0_g1;TRINITY_DN152_c0_g2;TRINITY_DN107_c0_g1;TRINITY_DN181_c0_g1;TRINITY_DN157_c0_g1;TRINITY_DN296_c3_g1;TRINITY_DN240_c0_g1;TRINITY_DN263_c2_g1;TRINITY_DN217_c11_g1;TRINITY_DN217_c0_g3;TRINITY_DN203_c0_g3;TRINITY_DN220_c2_g1;TRINITY_DN314_c1_g1;TRINITY_DN316_c2_g3;TRINITY_DN459_c0_g1;TRINITY_DN538_c1_g1;TRINI…
Transfer RNA biogenesis	Protein families: genetic information processing	Brite Hierarchies	147	K14169;K01409;K01874;K14168;K15335;K03231;K15332;K04487;K15326;K01889;K01880;K15331;K12597;K15323;K01868;K12579;K01737;K01876;K01887;K06176;K01886;K11373;K05542;K16631;K14527;K13628;K01875;K03495;K12619;K15901;K03514;K03650;K14290;K14289;K01885;K01892;K01869;K01870;K15432;K15324;K03538;K01082;K01008;K15407;K03177;K10669;K07936;K13177;K00784;K01866;K14530;K05545;K01872;K18066;K03539;K11374;K14415;…	409	TRINITY_DN77_c0_g1;TRINITY_DN38_c1_g1;TRINITY_DN40_c0_g1;TRINITY_DN11_c6_g1;TRINITY_DN149_c0_g1;TRINITY_DN149_c0_g2;TRINITY_DN258_c2_g1;TRINITY_DN251_c0_g1;TRINITY_DN261_c1_g1;TRINITY_DN278_c0_g2;TRINITY_DN309_c0_g1;TRINITY_DN327_c1_g1;TRINITY_DN338_c0_g1;TRINITY_DN426_c2_g1;TRINITY_DN466_c0_g1;TRINITY_DN421_c0_g1;TRINITY_DN421_c0_g2;TRINITY_DN400_c0_g5;TRINITY_DN400_c0_g1;TRINITY_DN428_c0_g1;TRI…
Thermogenesis	Environmental adaptation	Organismal Systems	150	K12323;K03943;K04362;K03937;K02257;K08765;K03951;K15109;K11650;K02270;K02833;K03964;K11450;K11647;K03942;K04441;K11340;K11653;K04688;K16184;K03099;K04426;K17797;K11416;K18175;K03958;K07376;K00414;K11649;K19523;K07207;K03934;K00235;K08046;K03946;K08045;K03962;K02273;K16816;K01897;K09048;K03935;K08044;K19524;K09008;K07206;K03955;K02271;K00420;K18163;K02127;K07827;K18164;K18180;K04143;K00413;K18162;…	399	TRINITY_DN60_c3_g1;TRINITY_DN3_c9_g2;TRINITY_DN86_c3_g1;TRINITY_DN86_c3_g3;TRINITY_DN86_c3_g4;TRINITY_DN112_c3_g1;TRINITY_DN184_c1_g2;TRINITY_DN123_c0_g1;TRINITY_DN199_c0_g1;TRINITY_DN168_c2_g1;TRINITY_DN206_c0_g1;TRINITY_DN297_c2_g1;TRINITY_DN203_c0_g3;TRINITY_DN444_c1_g1;TRINITY_DN491_c3_g2;TRINITY_DN420_c0_g1;TRINITY_DN420_c0_g2;TRINITY_DN468_c0_g1;TRINITY_DN538_c1_g1;TRINITY_DN545_c0_g1;TRINI…
Ras signaling pathway	Signal transduction	Environmental Information Processing	157	K17635;K04362;K05094;K05095;K04542;K06279;K17447;K04358;K04527;K00922;K07887;K07941;K02833;K13769;K07861;K05103;K14958;K04352;K04366;K17633;K03099;K17636;K19613;K07209;K08773;K17631;K04456;K05454;K05410;K04410;K07293;K07362;K08091;K13618;K07836;K04353;K04368;K04369;K08774;K01115;K05731;K04393;K04392;K05733;K05449;K05089;K04440;K05090;K05462;K04363;K18497;K16343;K05093;K05448;K04536;K02678;K02580;…	397	TRINITY_DN55_c1_g1;TRINITY_DN86_c3_g1;TRINITY_DN86_c3_g3;TRINITY_DN86_c3_g2;TRINITY_DN86_c3_g4;TRINITY_DN86_c1_g1;TRINITY_DN43_c0_g2;TRINITY_DN25_c0_g1;TRINITY_DN25_c0_g2;TRINITY_DN153_c1_g1;TRINITY_DN164_c1_g1;TRINITY_DN152_c0_g2;TRINITY_DN124_c0_g1;TRINITY_DN284_c0_g1;TRINITY_DN203_c0_g3;TRINITY_DN314_c1_g1;TRINITY_DN367_c0_g1;TRINITY_DN512_c0_g1;TRINITY_DN584_c0_g1;TRINITY_DN521_c0_g1;TRINITY_…
Purine metabolism	Nucleotide metabolism	Metabolism	131	K12323;K03010;K01519;K00856;K13755;K00088;K01951;K19021;K03026;K02324;K18436;K01490;K03022;K01081;K13988;K03006;K00364;K00106;K12324;K03783;K08046;K03016;K08045;K01513;K02327;K01756;K15779;K08044;K18283;K00939;K01587;K01514;K01835;K03005;K00948;K00944;K01511;K13293;K03024;K02999;K18437;K03021;K13761;K00873;K16855;K01952;K12305;K03009;K02328;K03004;K10808;K00940;K01509;K13296;K01517;K01939;K08718;…	387	TRINITY_DN60_c3_g1;TRINITY_DN55_c3_g2;TRINITY_DN42_c2_g1;TRINITY_DN33_c0_g1;TRINITY_DN175_c0_g1;TRINITY_DN134_c0_g1;TRINITY_DN156_c3_g1;TRINITY_DN240_c2_g1;TRINITY_DN307_c1_g1;TRINITY_DN326_c0_g1;TRINITY_DN480_c1_g1;TRINITY_DN402_c2_g2;TRINITY_DN402_c2_g1;TRINITY_DN688_c1_g1;TRINITY_DN679_c0_g1;TRINITY_DN679_c2_g1;TRINITY_DN707_c2_g1;TRINITY_DN890_c0_g1;TRINITY_DN890_c0_g3;TRINITY_DN888_c1_g1;TRI…
Protein processing in endoplasmic reticulum	Folding, sorting and degradation	Genetic Information Processing	122	K03094;K14005;K11863;K08057;K14003;K13249;K13989;K09508;K10575;K09502;K10661;K10080;K12275;K06689;K10636;K04426;K03237;K11718;K14019;K09540;K16196;K04431;K08852;K09525;K10085;K09580;K09582;K01230;K09556;K10082;K10976;K13984;K04440;K09523;K12670;K04523;K10950;K08288;K10088;K09027;K08056;K03173;K09586;K09584;K04079;K10578;K10839;K07953;K09518;K02161;K14016;K03347;K13719;K14000;K09487;K09530;K13999;…	384	TRINITY_DN85_c0_g1;TRINITY_DN50_c1_g1;TRINITY_DN192_c0_g4;TRINITY_DN192_c0_g5;TRINITY_DN195_c0_g1;TRINITY_DN195_c1_g1;TRINITY_DN197_c0_g1;TRINITY_DN197_c0_g2;TRINITY_DN267_c2_g4;TRINITY_DN381_c3_g1;TRINITY_DN338_c3_g1;TRINITY_DN462_c5_g1;TRINITY_DN428_c3_g1;TRINITY_DN571_c0_g1;TRINITY_DN593_c0_g1;TRINITY_DN629_c0_g1;TRINITY_DN660_c6_g2;TRINITY_DN660_c6_g1;TRINITY_DN653_c1_g2;TRINITY_DN611_c4_g1;T…
Viral carcinogenesis	Cancers: Overview	Human Diseases	123	K05411;K03124;K00922;K05699;K04498;K06624;K02833;K06062;K11404;K15305;K06067;K16197;K06053;K15413;K11224;K06625;K05854;K09504;K18671;K16175;K11838;K06063;K11408;K11407;K03990;K03137;K09849;K03159;K02187;K15041;K02089;K05060;K16198;K03120;K12886;K04685;K09048;K04393;K04392;K11594;K05760;K02206;K04734;K11218;K02580;K03173;K10691;K10610;K07210;K04469;K04378;K03143;K06626;K07827;K16332;K11406;K06630;…	383	TRINITY_DN15_c0_g1;TRINITY_DN23_c5_g1;TRINITY_DN152_c0_g2;TRINITY_DN151_c6_g1;TRINITY_DN165_c1_g2;TRINITY_DN201_c0_g1;TRINITY_DN203_c0_g3;TRINITY_DN233_c0_g1;TRINITY_DN329_c0_g1;TRINITY_DN337_c1_g1;TRINITY_DN307_c2_g1;TRINITY_DN306_c1_g1;TRINITY_DN477_c1_g2;TRINITY_DN494_c0_g2;TRINITY_DN583_c0_g1;TRINITY_DN543_c0_g2;TRINITY_DN572_c1_g1;TRINITY_DN572_c6_g1;TRINITY_DN738_c0_g1;TRINITY_DN760_c0_g1;T…
Rap1 signaling pathway	Signal transduction	Environmental Information Processing	138	K04362;K05094;K05095;K04634;K04358;K04527;K00922;K06271;K02833;K07861;K06277;K05631;K05103;K04441;K06093;K04289;K04366;K04630;K06069;K04456;K08046;K17706;K16857;K08045;K17698;K07362;K07836;K04353;K17704;K04368;K04369;K05731;K04393;K04392;K08044;K05449;K05089;K05090;K05462;K04363;K18497;K05093;K05448;K05689;K06493;K08014;K07827;K17700;K04359;K05097;K02649;K05702;K01116;K12361;K05096;K06274;K08732;…	380	TRINITY_DN86_c3_g1;TRINITY_DN86_c3_g3;TRINITY_DN86_c3_g2;TRINITY_DN86_c3_g4;TRINITY_DN86_c1_g1;TRINITY_DN22_c0_g3;TRINITY_DN153_c1_g1;TRINITY_DN164_c1_g1;TRINITY_DN152_c0_g2;TRINITY_DN121_c0_g1;TRINITY_DN203_c0_g3;TRINITY_DN367_c0_g1;TRINITY_DN371_c0_g1;TRINITY_DN372_c13_g1;TRINITY_DN485_c1_g1;TRINITY_DN512_c0_g1;TRINITY_DN538_c1_g1;TRINITY_DN546_c7_g1;TRINITY_DN546_c1_g2;TRINITY_DN566_c0_g1;TRIN…
Human cytomegalovirus infection	Infectious diseases: Viral	Human Diseases	144	K05411;K04346;K04635;K04634;K04542;K00922;K08057;K04960;K04639;K02833;K07861;K12331;K04441;K06625;K04688;K04366;K03099;K17834;K04630;K12330;K07207;K07209;K04377;K04456;K08046;K08045;K05410;K09849;K04726;K02187;K02089;K04446;K04368;K04369;K02373;K04348;K09048;K17388;K04392;K08044;K08055;K07206;K04363;K05408;K05760;K08056;K05448;K04536;K04734;K02580;K03173;K06493;K04959;K07210;K08738;K17334;K05055;…	379	TRINITY_DN15_c0_g1;TRINITY_DN22_c0_g5;TRINITY_DN22_c0_g1;TRINITY_DN22_c0_g3;TRINITY_DN43_c0_g2;TRINITY_DN152_c0_g2;TRINITY_DN195_c0_g1;TRINITY_DN296_c3_g1;TRINITY_DN251_c9_g1;TRINITY_DN203_c0_g3;TRINITY_DN367_c0_g1;TRINITY_DN416_c0_g1;TRINITY_DN485_c1_g1;TRINITY_DN538_c1_g1;TRINITY_DN543_c0_g2;TRINITY_DN552_c0_g1;TRINITY_DN619_c0_g1;TRINITY_DN632_c0_g1;TRINITY_DN622_c6_g1;TRINITY_DN653_c0_g2;TRIN…
cAMP signaling pathway	Signal transduction	Environmental Information Processing	129	K12323;K06225;K06270;K04615;K00922;K04498;K05742;K01539;K19021;K05850;K07861;K00232;K05199;K04366;K04630;K01540;K04456;K08046;K08045;K05673;K07836;K04353;K04446;K04368;K04369;K01115;K05731;K09048;K17388;K04392;K08044;K18435;K04440;K04734;K06230;K02580;K05214;K04409;K08014;K13293;K05730;K04515;K05212;K05211;K04514;K02649;K06269;K05702;K12755;K05198;K01538;K04365;K16797;K04851;K02158;K13296;K04229;…	372	TRINITY_DN60_c3_g1;TRINITY_DN8_c1_g1;TRINITY_DN1_c0_g1;TRINITY_DN48_c1_g1;TRINITY_DN152_c0_g2;TRINITY_DN165_c1_g2;TRINITY_DN157_c0_g1;TRINITY_DN271_c0_g1;TRINITY_DN271_c0_g3;TRINITY_DN240_c2_g1;TRINITY_DN378_c0_g1;TRINITY_DN367_c0_g1;TRINITY_DN322_c7_g2;TRINITY_DN501_c3_g1;TRINITY_DN619_c0_g1;TRINITY_DN653_c0_g2;TRINITY_DN914_c1_g1;TRINITY_DN944_c0_g1;TRINITY_DN944_c0_g2;TRINITY_DN906_c2_g1;TRINI…
Human immunodeficiency virus 1 infection	Infectious diseases: Viral	Human Diseases	129	K03094;K05411;K04635;K04634;K04542;K00922;K08057;K04404;K04960;K02833;K07861;K12393;K03362;K04441;K04688;K04366;K17834;K04630;K07209;K04456;K04403;K04427;K05410;K09849;K04410;K04431;K04726;K02187;K04446;K04368;K04369;K02373;K04348;K11789;K04392;K05733;K08055;K04440;K05760;K10648;K08056;K04536;K04734;K02580;K03173;K10609;K10610;K04959;K07210;K08738;K06632;K17334;K04409;K07827;K04570;K02161;K03347;…	354	TRINITY_DN85_c0_g1;TRINITY_DN15_c0_g1;TRINITY_DN22_c0_g1;TRINITY_DN22_c0_g3;TRINITY_DN43_c0_g2;TRINITY_DN152_c0_g2;TRINITY_DN195_c0_g1;TRINITY_DN100_c0_g1;TRINITY_DN296_c3_g1;TRINITY_DN203_c0_g3;TRINITY_DN367_c0_g1;TRINITY_DN306_c2_g1;TRINITY_DN332_c1_g1;TRINITY_DN485_c1_g1;TRINITY_DN538_c1_g1;TRINITY_DN552_c0_g1;TRINITY_DN619_c0_g1;TRINITY_DN622_c6_g1;TRINITY_DN653_c0_g2;TRINITY_DN842_c0_g1;TRIN…
RNA transport	Translation	Genetic Information Processing	121	K03254;K03241;K14326;K14304;K05749;K14321;K03243;K12883;K03231;K03253;K02516;K09291;K14323;K13129;K12879;K14303;K03680;K12877;K13126;K13131;K03237;K03257;K14527;K13174;K12875;K14311;K14322;K12812;K13175;K03113;K03262;K14290;K03345;K14289;K15516;K13114;K10577;K14306;K03246;K14314;K14293;K03538;K03259;K03249;K03239;K03260;K14324;K07936;K14325;K12881;K12878;K03250;K00784;K14283;K14310;K14317;K14312;…	341	TRINITY_DN93_c1_g1;TRINITY_DN31_c1_g1;TRINITY_DN14_c0_g1;TRINITY_DN125_c0_g1;TRINITY_DN132_c0_g1;TRINITY_DN134_c1_g1;TRINITY_DN186_c1_g1;TRINITY_DN209_c0_g2;TRINITY_DN258_c2_g1;TRINITY_DN251_c1_g3;TRINITY_DN204_c0_g1;TRINITY_DN330_c0_g1;TRINITY_DN381_c2_g1;TRINITY_DN474_c1_g2;TRINITY_DN453_c0_g2;TRINITY_DN482_c1_g2;TRINITY_DN505_c0_g1;TRINITY_DN530_c1_g1;TRINITY_DN520_c2_g1;TRINITY_DN623_c3_g2;TR…
Axon guidance	Development	Organismal Systems	106	K12077;K06840;K06225;K06842;K00922;K06821;K06843;K06226;K00444;K02833;K07861;K05105;K05103;K05108;K06093;K04352;K07526;K04366;K04630;K06850;K06529;K02090;K06755;K06521;K04410;K07293;K04348;K04393;K17388;K04392;K05733;K06845;K05462;K05112;K06838;K04966;K17334;K04409;K06619;K07827;K04515;K04514;K02649;K06724;K01116;K05744;K06820;K07520;K06572;K07365;K05765;K07530;K06844;K05128;K05725;K06754;K05743;…	335	TRINITY_DN70_c1_g1;TRINITY_DN97_c3_g1;TRINITY_DN8_c1_g1;TRINITY_DN26_c0_g1;TRINITY_DN152_c0_g2;TRINITY_DN191_c0_g1;TRINITY_DN191_c0_g2;TRINITY_DN276_c0_g2;TRINITY_DN263_c2_g1;TRINITY_DN217_c11_g1;TRINITY_DN217_c0_g3;TRINITY_DN203_c0_g3;TRINITY_DN367_c0_g1;TRINITY_DN512_c0_g4;TRINITY_DN512_c0_g1;TRINITY_DN512_c0_g3;TRINITY_DN546_c7_g1;TRINITY_DN546_c1_g2;TRINITY_DN521_c0_g1;TRINITY_DN509_c3_g2;TRI…
Herpes simplex infection	Infectious diseases: Viral	Human Diseases	107	K03094;K05411;K12646;K12896;K04498;K04404;K03127;K03115;K15413;K14216;K12648;K12890;K03134;K03237;K05130;K11838;K03006;K02633;K07209;K03990;K04403;K04427;K11674;K16196;K05410;K02207;K09849;K02187;K07293;K07211;K11221;K02373;K02223;K03120;K12886;K11219;K03121;K04440;K06752;K02206;K04734;K02580;K03173;K07210;K08738;K10054;K12881;K03097;K14624;K03347;K05433;K06269;K15409;K06751;K04696;K06531;K03133;…	333	TRINITY_DN85_c0_g1;TRINITY_DN15_c0_g1;TRINITY_DN45_c0_g1;TRINITY_DN111_c0_g1;TRINITY_DN165_c1_g2;TRINITY_DN100_c0_g1;TRINITY_DN293_c4_g1;TRINITY_DN332_c0_g1;TRINITY_DN494_c0_g2;TRINITY_DN579_c0_g1;TRINITY_DN579_c0_g3;TRINITY_DN667_c0_g1;TRINITY_DN675_c0_g1;TRINITY_DN648_c0_g1;TRINITY_DN703_c1_g1;TRINITY_DN784_c0_g2;TRINITY_DN725_c0_g1;TRINITY_DN764_c3_g1;TRINITY_DN890_c0_g1;TRINITY_DN890_c0_g3;TR…
Hepatocellular carcinoma	Cancers: Specific types	Human Diseases	104	K11723;K06279;K17447;K00922;K13377;K11650;K00799;K02432;K00444;K02833;K10456;K13769;K10140;K03096;K11647;K02353;K06625;K11340;K11653;K04688;K04366;K03099;K04501;K11649;K11757;K02620;K04491;K04377;K04456;K04500;K02089;K04368;K04369;K08774;K04674;K03511;K01110;K04402;K08957;K07827;K04570;K00510;K02649;K01116;K11765;K04375;K00355;K09593;K13375;K04365;K04451;K13376;K02158;K06621;K03068;K11648;K05692;…	331	TRINITY_DN46_c3_g1;TRINITY_DN25_c0_g1;TRINITY_DN25_c0_g2;TRINITY_DN152_c0_g2;TRINITY_DN156_c1_g2;TRINITY_DN206_c0_g1;TRINITY_DN243_c0_g1;TRINITY_DN287_c4_g1;TRINITY_DN240_c0_g1;TRINITY_DN217_c11_g1;TRINITY_DN217_c0_g3;TRINITY_DN203_c0_g3;TRINITY_DN352_c0_g2;TRINITY_DN314_c1_g1;TRINITY_DN346_c1_g1;TRINITY_DN391_c0_g1;TRINITY_DN420_c0_g1;TRINITY_DN420_c0_g2;TRINITY_DN562_c1_g2;TRINITY_DN543_c0_g2;T…
Glycosyltransferases	Protein families: metabolism	Brite Hierarchies	152	K11703;K13646;K01020;K01022;K00722;K00721;K00710;K09654;K03845;K09667;K00779;K02577;K00747;K07966;K00719;K11718;K09663;K00693;K02576;K00720;K09668;K00729;K00728;K00741;K09669;K03847;K00742;K18134;K00709;K02366;K04746;K09666;K03373;K02369;K00738;K09679;K07809;K00781;K13675;K18207;K09653;K13676;K00771;K08105;K03370;K00716;K03850;K06616;K01988;K01001;K07820;K07432;K00736;K04745;K05286;K09677;K10158;…	326	TRINITY_DN29_c3_g1;TRINITY_DN99_c0_g4;TRINITY_DN128_c0_g2;TRINITY_DN128_c1_g1;TRINITY_DN133_c0_g1;TRINITY_DN158_c1_g1;TRINITY_DN130_c3_g1;TRINITY_DN137_c0_g1;TRINITY_DN223_c2_g1;TRINITY_DN277_c0_g1;TRINITY_DN395_c3_g1;TRINITY_DN383_c0_g1;TRINITY_DN483_c1_g1;TRINITY_DN420_c1_g1;TRINITY_DN580_c0_g1;TRINITY_DN707_c1_g1;TRINITY_DN724_c3_g1;TRINITY_DN717_c0_g1;TRINITY_DN852_c2_g2;TRINITY_DN852_c2_g1;T…
Huntington disease	Neurodegenerative diseases	Human Diseases	122	K03010;K03943;K04634;K03937;K03951;K04498;K10426;K02270;K06067;K05625;K11825;K03964;K10424;K04559;K03942;K03958;K00414;K04638;K03006;K03934;K00235;K11824;K03946;K03016;K03962;K02273;K02187;K15041;K03120;K09048;K03935;K03955;K10408;K02271;K00420;K15040;K08738;K02127;K00413;K03959;K09222;K02263;K04684;K04646;K03948;K11827;K04564;K11826;K03009;K02132;K04451;K02138;K05858;K03950;K04958;K00418;K03949;…	312	TRINITY_DN55_c3_g2;TRINITY_DN3_c9_g2;TRINITY_DN22_c0_g3;TRINITY_DN112_c3_g1;TRINITY_DN199_c0_g1;TRINITY_DN165_c1_g2;TRINITY_DN159_c0_g1;TRINITY_DN297_c2_g1;TRINITY_DN307_c2_g1;TRINITY_DN378_c10_g1;TRINITY_DN339_c1_g1;TRINITY_DN444_c1_g1;TRINITY_DN404_c2_g1;TRINITY_DN423_c0_g1;TRINITY_DN485_c1_g1;TRINITY_DN468_c0_g1;TRINITY_DN864_c1_g1;TRINITY_DN894_c2_g1;TRINITY_DN844_c0_g1;TRINITY_DN890_c0_g1;TR…
Cellular senescence	Cell growth and death	Cellular Processes	101	K06645;K05864;K00922;K13377;K04960;K02833;K10138;K09183;K03362;K18753;K04441;K10867;K06625;K04383;K04366;K07207;K04377;K04456;K02830;K04682;K04500;K15041;K02089;K04446;K04368;K04369;K04348;K04685;K07206;K04674;K03982;K02206;K01110;K04402;K02678;K02580;K04959;K15040;K17334;K08826;K06626;K07827;K16332;K02649;K06269;K10994;K06751;K07201;K09408;K10752;K06640;K10152;K10151;K07208;K13375;K04451;K13376;…	307	TRINITY_DN0_c28_g2;TRINITY_DN180_c1_g1;TRINITY_DN152_c0_g2;TRINITY_DN156_c1_g2;TRINITY_DN296_c3_g1;TRINITY_DN203_c0_g3;TRINITY_DN352_c4_g1;TRINITY_DN319_c0_g1;TRINITY_DN332_c1_g1;TRINITY_DN392_c0_g1;TRINITY_DN538_c1_g1;TRINITY_DN503_c1_g2;TRINITY_DN543_c0_g2;TRINITY_DN645_c0_g1;TRINITY_DN645_c0_g2;TRINITY_DN619_c0_g1;TRINITY_DN802_c0_g1;TRINITY_DN939_c0_g2;TRINITY_DN980_c0_g2;TRINITY_DN944_c0_g1;…
Kaposi sarcoma-associated herpesvirus infection	Infectious diseases: Viral	Human Diseases	116	K05411;K04542;K00922;K04498;K04960;K02833;K15308;K04441;K06625;K05854;K04366;K05130;K07209;K03990;K04377;K04456;K05410;K04431;K04726;K02187;K07211;K11221;K02089;K05060;K04446;K04368;K04369;K02373;K04348;K10071;K04392;K11219;K04440;K18497;K05448;K04536;K04734;K08334;K02580;K03173;K04959;K07210;K08738;K17334;K07827;K02649;K06751;K01116;K04549;K04390;K08341;K04451;K04958;K16195;K04538;K04398;K05505;…	307	TRINITY_DN15_c0_g1;TRINITY_DN43_c0_g2;TRINITY_DN152_c0_g2;TRINITY_DN165_c1_g2;TRINITY_DN296_c3_g1;TRINITY_DN203_c0_g3;TRINITY_DN461_c0_g1;TRINITY_DN538_c1_g1;TRINITY_DN543_c0_g2;TRINITY_DN572_c1_g1;TRINITY_DN619_c0_g1;TRINITY_DN725_c0_g1;TRINITY_DN842_c0_g1;TRINITY_DN986_c0_g1;TRINITY_DN986_c0_g3;TRINITY_DN939_c0_g2;TRINITY_DN944_c0_g1;TRINITY_DN944_c0_g2;TRINITY_DN906_c2_g1;TRINITY_DN1049_c0_g1;…
Chemokine signaling pathway	Immune system	Organismal Systems	126	K04542;K06279;K17447;K00922;K02833;K04185;K08291;K11224;K05854;K04366;K03099;K04630;K08822;K07209;K04456;K08046;K04182;K08045;K11221;K07836;K04353;K04368;K05731;K04393;K17388;K04392;K08044;K00910;K04439;K05510;K05408;K05760;K04536;K04734;K06068;K11218;K02580;K07210;K05747;K04409;K07827;K05730;K14624;K04514;K02649;K05871;K10035;K08011;K09408;K12361;K05514;K04549;K04365;K05858;K05726;K04538;K02158;…	304	TRINITY_DN43_c0_g2;TRINITY_DN25_c0_g1;TRINITY_DN25_c0_g2;TRINITY_DN152_c0_g2;TRINITY_DN203_c0_g3;TRINITY_DN365_c0_g2;TRINITY_DN447_c1_g1;TRINITY_DN583_c0_g1;TRINITY_DN572_c1_g1;TRINITY_DN619_c0_g1;TRINITY_DN649_c1_g1;TRINITY_DN632_c0_g1;TRINITY_DN653_c0_g2;TRINITY_DN827_c0_g1;TRINITY_DN842_c0_g1;TRINITY_DN944_c0_g1;TRINITY_DN944_c0_g2;TRINITY_DN906_c2_g1;TRINITY_DN956_c1_g1;TRINITY_DN949_c1_g1;TR…
Cell adhesion molecules	Protein families: signaling and cellular processes	Brite Hierarchies	95	K06583;K06485;K04600;K06588;K06770;K06484;K16353;K16499;K06812;K06755;K04601;K16505;K06592;K07597;K16496;K06736;K06539;K06462;K05689;K06788;K06493;K06481;K06781;K06593;K16507;K16498;K06531;K06589;K06551;K16494;K06487;K06791;K06773;K06784;K16495;K06754;K06803;K06814;K06753;K06586;K16504;K06480;K06483;K06534;K06762;K05719;K06491;K16506;K16493;K06266;K06496;K06525;K06550;K06808;K06758;K16497;K06464;…	303	TRINITY_DN67_c0_g1;TRINITY_DN264_c1_g1;TRINITY_DN301_c0_g1;TRINITY_DN316_c2_g3;TRINITY_DN403_c0_g2;TRINITY_DN459_c0_g1;TRINITY_DN508_c4_g1;TRINITY_DN676_c1_g1;TRINITY_DN757_c3_g1;TRINITY_DN923_c1_g1;TRINITY_DN964_c0_g1;TRINITY_DN1358_c0_g1;TRINITY_DN1348_c1_g1;TRINITY_DN1563_c2_g1;TRINITY_DN1574_c0_g1;TRINITY_DN1574_c4_g1;TRINITY_DN1574_c1_g2;TRINITY_DN1670_c2_g1;TRINITY_DN1775_c0_g2;TRINITY_DN18…
cGMP-PKG signaling pathway	Signal transduction	Environmental Information Processing	101	K12323;K07187;K04346;K04635;K04634;K06270;K04527;K04960;K01539;K19021;K04639;K05850;K09183;K05849;K04366;K04630;K05853;K07376;K01540;K12324;K04456;K08046;K08045;K15041;K04446;K04368;K04369;K04348;K09048;K17388;K08044;K18283;K03121;K18050;K04959;K15040;K17334;K04378;K04514;K04143;K00907;K06269;K12755;K16172;K01538;K09262;K04454;K06274;K05858;K04851;K04958;K02158;K13296;K04371;K09565;K18154;K04197;…	303	TRINITY_DN60_c3_g1;TRINITY_DN70_c0_g2;TRINITY_DN22_c0_g5;TRINITY_DN22_c0_g1;TRINITY_DN22_c0_g3;TRINITY_DN1_c0_g1;TRINITY_DN164_c1_g1;TRINITY_DN296_c3_g1;TRINITY_DN271_c0_g1;TRINITY_DN271_c0_g3;TRINITY_DN240_c2_g1;TRINITY_DN251_c9_g1;TRINITY_DN378_c0_g1;TRINITY_DN319_c0_g1;TRINITY_DN485_c1_g1;TRINITY_DN665_c6_g1;TRINITY_DN619_c0_g1;TRINITY_DN653_c0_g2;TRINITY_DN751_c0_g1;TRINITY_DN804_c1_g1;TRINIT…
MicroRNAs in cancer	Cancers: Overview	Human Diseases	115	K07187;K05094;K06645;K07606;K06279;K04498;K06624;K02833;K11459;K06252;K06484;K06625;K05665;K04366;K03099;K07209;K04377;K15379;K17398;K16857;K02187;K04368;K04369;K12886;K02599;K10577;K09299;K05089;K04363;K05448;K01110;K18050;K02580;K06493;K00558;K09850;K16865;K06619;K06626;K02539;K07827;K01425;K04359;K05762;K00510;K02161;K04514;K09295;K17460;K10127;K01116;K16172;K08270;K10151;K04445;K05083;K04451;…	297	TRINITY_DN70_c0_g2;TRINITY_DN86_c3_g2;TRINITY_DN0_c28_g2;TRINITY_DN49_c2_g1;TRINITY_DN25_c0_g1;TRINITY_DN165_c1_g2;TRINITY_DN201_c0_g1;TRINITY_DN203_c0_g3;TRINITY_DN203_c1_g1;TRINITY_DN324_c0_g1;TRINITY_DN459_c0_g1;TRINITY_DN543_c0_g2;TRINITY_DN674_c2_g1;TRINITY_DN619_c0_g1;TRINITY_DN632_c0_g1;TRINITY_DN842_c0_g1;TRINITY_DN939_c0_g2;TRINITY_DN940_c1_g1;TRINITY_DN918_c0_g1;TRINITY_DN1044_c0_g1;TRI…
Phagosome	Transport and catabolism	Cellular Processes	78	K10068;K08009;K08057;K07887;K06588;K12478;K10089;K06484;K13505;K13883;K02149;K02154;K06558;K03990;K03661;K16857;K13885;K02147;K12182;K06528;K04392;K08492;K06752;K06560;K10414;K08488;K02148;K06493;K06481;K06563;K08010;K10416;K10413;K01365;K02144;K03662;K06751;K02145;K08011;K07374;K07889;K06487;K01330;K07342;K10415;K07375;K02150;K00921;K06503;K04659;K10169;K13813;K05692;K10956;K12560;K05719;K13882;…	292	TRINITY_DN78_c6_g1;TRINITY_DN189_c1_g1;TRINITY_DN195_c0_g1;TRINITY_DN124_c0_g1;TRINITY_DN316_c2_g3;TRINITY_DN469_c1_g1;TRINITY_DN434_c0_g2;TRINITY_DN459_c0_g1;TRINITY_DN546_c3_g1;TRINITY_DN704_c0_g1;TRINITY_DN784_c0_g1;TRINITY_DN775_c0_g1;TRINITY_DN775_c0_g2;TRINITY_DN775_c0_g3;TRINITY_DN950_c0_g1;TRINITY_DN986_c0_g1;TRINITY_DN986_c0_g3;TRINITY_DN1043_c0_g1;TRINITY_DN1044_c0_g1;TRINITY_DN1093_c2_…
Alzheimer disease	Neurodegenerative diseases	Human Diseases	117	K03943;K04550;K04634;K03937;K04524;K03951;K04960;K04963;K02270;K00134;K06172;K03964;K04505;K03942;K05853;K02090;K03958;K00414;K03934;K00235;K03946;K03962;K02273;K04726;K08852;K02187;K02373;K04348;K03935;K03955;K02271;K00420;K04959;K08738;K06704;K04532;K02127;K05212;K05211;K06059;K00413;K03959;K09054;K02263;K03948;K04521;K04390;K04520;K04397;K02132;K02138;K05858;K03950;K04851;K04958;K03853;K00418;…	287	TRINITY_DN3_c9_g2;TRINITY_DN98_c1_g1;TRINITY_DN22_c0_g3;TRINITY_DN112_c3_g1;TRINITY_DN132_c0_g2;TRINITY_DN199_c0_g1;TRINITY_DN296_c3_g1;TRINITY_DN258_c7_g1;TRINITY_DN297_c2_g1;TRINITY_DN236_c0_g1;TRINITY_DN252_c0_g2;TRINITY_DN444_c1_g1;TRINITY_DN494_c2_g2;TRINITY_DN485_c1_g1;TRINITY_DN468_c0_g1;TRINITY_DN751_c0_g1;TRINITY_DN769_c0_g1;TRINITY_DN864_c1_g1;TRINITY_DN894_c2_g1;TRINITY_DN819_c1_g2;TRI…
Calcium signaling pathway	Signal transduction	Environmental Information Processing	119	K04635;K04637;K04634;K13755;K04960;K04963;K05850;K04718;K00911;K04855;K00871;K05849;K05853;K05857;K04297;K07190;K04854;K15041;K04348;K08044;K05089;K04363;K16059;K04852;K04959;K15040;K05218;K16057;K16058;K04515;K05212;K05211;K04248;K04143;K04344;K00907;K05871;K01116;K04849;K05083;K05858;K04851;K04958;K05219;K04633;K04229;K09565;K04197;K06268;K05863;K05084;K05215;K08042;K13241;K03915;K04962;K05860;…	286	TRINITY_DN22_c0_g1;TRINITY_DN22_c0_g2;TRINITY_DN22_c0_g3;TRINITY_DN175_c0_g1;TRINITY_DN296_c3_g1;TRINITY_DN258_c7_g1;TRINITY_DN378_c0_g1;TRINITY_DN362_c0_g1;TRINITY_DN333_c1_g1;TRINITY_DN485_c1_g1;TRINITY_DN455_c0_g1;TRINITY_DN528_c7_g1;TRINITY_DN613_c9_g1;TRINITY_DN686_c0_g1;TRINITY_DN665_c6_g1;TRINITY_DN751_c0_g1;TRINITY_DN733_c0_g1;TRINITY_DN1035_c0_g1;TRINITY_DN1083_c1_g1;TRINITY_DN1076_c0_g1…
NOD-like receptor signaling pathway	Immune system	Organismal Systems	94	K05411;K08009;K16060;K04404;K04960;K12798;K12805;K04441;K14216;K12807;K12648;K03671;K05482;K05130;K06030;K07209;K04403;K04427;K17890;K05410;K09849;K04725;K07211;K15041;K11221;K11974;K02373;K11864;K08847;K11219;K04440;K08727;K04734;K06068;K02580;K03173;K04959;K07210;K15040;K10630;K04079;K12653;K04570;K14624;K03462;K02161;K12804;K01165;K08341;K12799;K05858;K04958;K04398;K08339;K17065;K05505;K05405;…	286	TRINITY_DN15_c0_g1;TRINITY_DN189_c1_g1;TRINITY_DN111_c2_g1;TRINITY_DN100_c0_g1;TRINITY_DN296_c3_g1;TRINITY_DN264_c2_g2;TRINITY_DN415_c4_g1;TRINITY_DN538_c1_g2;TRINITY_DN538_c1_g1;TRINITY_DN579_c0_g1;TRINITY_DN579_c0_g3;TRINITY_DN613_c0_g1;TRINITY_DN613_c0_g3;TRINITY_DN667_c0_g1;TRINITY_DN675_c0_g1;TRINITY_DN603_c2_g2;TRINITY_DN603_c2_g1;TRINITY_DN770_c0_g1;TRINITY_DN725_c0_g1;TRINITY_DN833_c1_g1;…
Fluid shear stress and atherosclerosis	Cardiovascular diseases	Human Diseases	85	K00922;K08009;K00799;K10456;K07861;K04662;K04441;K04383;K03671;K04426;K07209;K04456;K04427;K01398;K04431;K12336;K04392;K04440;K05448;K02580;K06493;K07210;K08010;K04079;K04359;K14624;K00510;K02161;K01365;K02649;K09487;K12791;K08011;K00355;K04454;K06487;K04451;K04673;K05725;K08107;K08008;K05692;K05704;K04670;K06527;K04387;K07198;K12160;K17845;K16366;K09260;K04513;K04467;K18952;K03158;K04671;K07860;…	278	TRINITY_DN152_c0_g2;TRINITY_DN189_c1_g1;TRINITY_DN243_c0_g1;TRINITY_DN287_c4_g1;TRINITY_DN352_c0_g2;TRINITY_DN367_c0_g1;TRINITY_DN512_c0_g2;TRINITY_DN538_c1_g1;TRINITY_DN645_c0_g1;TRINITY_DN645_c0_g2;TRINITY_DN603_c2_g2;TRINITY_DN603_c2_g1;TRINITY_DN611_c4_g1;TRINITY_DN842_c0_g1;TRINITY_DN944_c0_g1;TRINITY_DN944_c0_g2;TRINITY_DN906_c2_g1;TRINITY_DN1077_c0_g1;TRINITY_DN1084_c1_g1;TRINITY_DN1149_c1…
GTP-binding proteins	Protein families: signaling and cellular processes	Brite Hierarchies	150	K04346;K04635;K04637;K04634;K04542;K07893;K07194;K07902;K07887;K07952;K07875;K07874;K07941;K04639;K02833;K07909;K07861;K07910;K07931;K07868;K07907;K07878;K07906;K07913;K07865;K07912;K04535;K04630;K07921;K17199;K07950;K07877;K07904;K07933;K07937;K07836;K04353;K07943;K04393;K07938;K04392;K17197;K07928;K07881;K04536;K07844;K12272;K07955;K07936;K07827;K07953;K07864;K07886;K07963;K07905;K07935;K07854;…	275	TRINITY_DN22_c0_g5;TRINITY_DN22_c0_g1;TRINITY_DN22_c0_g2;TRINITY_DN22_c0_g3;TRINITY_DN43_c0_g2;TRINITY_DN1_c1_g1;TRINITY_DN75_c0_g1;TRINITY_DN163_c1_g1;TRINITY_DN124_c0_g1;TRINITY_DN135_c0_g1;TRINITY_DN200_c1_g2;TRINITY_DN200_c1_g1;TRINITY_DN284_c0_g1;TRINITY_DN251_c9_g1;TRINITY_DN203_c0_g3;TRINITY_DN231_c1_g1;TRINITY_DN367_c0_g1;TRINITY_DN308_c1_g1;TRINITY_DN496_c0_g1;TRINITY_DN485_c1_g1;TRINITY…
Platelet activation	Immune system	Organismal Systems	80	K04634;K06270;K00922;K06271;K04960;K04639;K04441;K06236;K05854;K04630;K12330;K00509;K06069;K07376;K04456;K08046;K08045;K07836;K04353;K17704;K12757;K17388;K08044;K08508;K16059;K06493;K06481;K04959;K16342;K17084;K04514;K03900;K02649;K00907;K06269;K12361;K04350;K06261;K06274;K05858;K04958;K07532;K05692;K05704;K04371;K04513;K05719;K18952;K05215;K08042;K07370;K05703;K19720;K04345;K01832;K04264;K04263;…	265	TRINITY_DN22_c0_g3;TRINITY_DN1_c0_g1;TRINITY_DN152_c0_g2;TRINITY_DN121_c0_g1;TRINITY_DN296_c3_g1;TRINITY_DN251_c9_g1;TRINITY_DN485_c1_g1;TRINITY_DN538_c1_g1;TRINITY_DN578_c0_g1;TRINITY_DN572_c1_g1;TRINITY_DN653_c0_g2;TRINITY_DN609_c0_g1;TRINITY_DN734_c0_g1;TRINITY_DN780_c5_g1;TRINITY_DN804_c1_g1;TRINITY_DN944_c0_g1;TRINITY_DN944_c0_g2;TRINITY_DN906_c2_g1;TRINITY_DN956_c1_g1;TRINITY_DN1003_c1_g1;T…
Hippo signaling pathway	Signal transduction	Environmental Information Processing	101	K19631;K13377;K04354;K06094;K02432;K00444;K04382;K16197;K03362;K05706;K04662;K02353;K06093;K09448;K04501;K16175;K06069;K02620;K04491;K16687;K03456;K04377;K04500;K16198;K16819;K04674;K03982;K08791;K05689;K09850;K06827;K16684;K04412;K06630;K16823;K06269;K16820;K12075;K16682;K08960;K10152;K10151;K13375;K13376;K04673;K09782;K04664;K06092;K05692;K04388;K06091;K17693;K04503;K16686;K04680;K06685;K04676;…	262	TRINITY_DN109_c1_g1;TRINITY_DN156_c1_g2;TRINITY_DN191_c2_g1;TRINITY_DN214_c0_g1;TRINITY_DN240_c0_g1;TRINITY_DN217_c11_g1;TRINITY_DN217_c0_g3;TRINITY_DN387_c2_g1;TRINITY_DN306_c1_g1;TRINITY_DN332_c1_g1;TRINITY_DN478_c1_g1;TRINITY_DN512_c0_g2;TRINITY_DN562_c1_g2;TRINITY_DN546_c7_g1;TRINITY_DN546_c1_g2;TRINITY_DN672_c0_g1;TRINITY_DN638_c3_g1;TRINITY_DN632_c3_g2;TRINITY_DN762_c0_g1;TRINITY_DN760_c0_g…
Influenza A	Infectious diseases: Viral	Human Diseases	96	K05411;K12646;K15047;K00922;K04498;K15046;K04722;K04441;K14216;K04383;K12648;K04366;K15042;K05482;K03237;K05130;K07209;K00787;K12812;K04456;K16196;K05410;K04431;K07211;K14754;K11221;K14290;K04368;K04369;K15044;K11219;K04440;K09523;K06752;K12968;K04734;K02580;K09633;K08738;K10054;K12653;K14624;K02649;K10652;K04696;K05133;K14396;K01165;K04390;K12799;K16195;K03283;K04432;K01349;K05405;K14297;K11217;…	262	TRINITY_DN15_c0_g1;TRINITY_DN45_c0_g1;TRINITY_DN11_c3_g1;TRINITY_DN152_c0_g2;TRINITY_DN165_c1_g2;TRINITY_DN348_c1_g1;TRINITY_DN455_c2_g1;TRINITY_DN538_c1_g1;TRINITY_DN579_c0_g1;TRINITY_DN579_c0_g3;TRINITY_DN645_c0_g1;TRINITY_DN645_c0_g2;TRINITY_DN667_c0_g1;TRINITY_DN675_c0_g1;TRINITY_DN619_c0_g1;TRINITY_DN656_c0_g2;TRINITY_DN770_c0_g1;TRINITY_DN784_c0_g2;TRINITY_DN725_c0_g1;TRINITY_DN842_c0_g1;TR…
Phospholipase D signaling pathway	Signal transduction	Environmental Information Processing	87	K04346;K06279;K17447;K04527;K01528;K00922;K00889;K13523;K07941;K04639;K00901;K02833;K04718;K13509;K04289;K04366;K03099;K07207;K04456;K08046;K08045;K07293;K07937;K08091;K04368;K04369;K01115;K08044;K05089;K07206;K04363;K16342;K08014;K07827;K04359;K02649;K05871;K01116;K01080;K09593;K08732;K07208;K05450;K05858;K18441;K04371;K04357;K07829;K04275;K07830;K04513;K08042;K05703;K05091;K04364;K07835;K04351;…	262	TRINITY_DN22_c0_g5;TRINITY_DN25_c0_g1;TRINITY_DN25_c0_g2;TRINITY_DN164_c1_g1;TRINITY_DN122_c1_g1;TRINITY_DN152_c0_g2;TRINITY_DN176_c2_g2;TRINITY_DN147_c1_g1;TRINITY_DN284_c0_g1;TRINITY_DN251_c9_g1;TRINITY_DN217_c1_g1;TRINITY_DN203_c0_g3;TRINITY_DN331_c0_g1;TRINITY_DN362_c0_g1;TRINITY_DN414_c0_g3;TRINITY_DN492_c1_g2;TRINITY_DN447_c0_g1;TRINITY_DN447_c0_g2;TRINITY_DN566_c0_g1;TRINITY_DN686_c0_g1;TR…
Oxytocin signaling pathway	Endocrine system	Organismal Systems	94	K12323;K04634;K06270;K04960;K04963;K02833;K06625;K04366;K04630;K12324;K08046;K08045;K04446;K04368;K04369;K04348;K17388;K08044;K04959;K16342;K04859;K17334;K07827;K04515;K04514;K05007;K00907;K06269;K12755;K07359;K04375;K04454;K04534;K05858;K04851;K04958;K04872;K12329;K04229;K05692;K05704;K07199;K04371;K08794;K07198;K18154;K04503;K06268;K04513;K17901;K08042;K04962;K04345;K04999;K04961;K04463;K17457;…	260	TRINITY_DN60_c3_g1;TRINITY_DN22_c0_g3;TRINITY_DN1_c0_g1;TRINITY_DN296_c3_g1;TRINITY_DN258_c7_g1;TRINITY_DN203_c0_g3;TRINITY_DN485_c1_g1;TRINITY_DN543_c0_g2;TRINITY_DN619_c0_g1;TRINITY_DN653_c0_g2;TRINITY_DN902_c0_g3;TRINITY_DN956_c1_g1;TRINITY_DN1003_c1_g1;TRINITY_DN1158_c1_g1;TRINITY_DN1222_c1_g1;TRINITY_DN1216_c0_g1;TRINITY_DN1216_c0_g2;TRINITY_DN1311_c0_g1;TRINITY_DN1342_c1_g1;TRINITY_DN1481_c…
mTOR signaling pathway	Signal transduction	Environmental Information Processing	88	K04527;K00922;K08271;K02432;K08269;K00444;K02833;K13302;K07298;K02353;K04688;K16184;K04366;K03099;K06276;K02149;K09594;K11137;K07207;K07209;K14995;K04456;K06519;K02147;K08272;K04368;K04369;K07206;K16186;K01110;K17532;K03259;K02148;K07827;K02649;K02144;K10421;K02145;K16185;K16172;K04370;K08270;K03258;K07208;K08267;K04365;K02150;K03068;K05459;K07205;K04371;K07198;K02354;K01384;K04513;K04467;K04373;…	259	TRINITY_DN164_c1_g1;TRINITY_DN152_c0_g2;TRINITY_DN297_c8_g1;TRINITY_DN240_c0_g1;TRINITY_DN270_c0_g1;TRINITY_DN217_c11_g1;TRINITY_DN217_c0_g3;TRINITY_DN203_c0_g3;TRINITY_DN283_c0_g1;TRINITY_DN452_c0_g1;TRINITY_DN409_c0_g1;TRINITY_DN417_c0_g1;TRINITY_DN562_c1_g2;TRINITY_DN552_c0_g1;TRINITY_DN681_c0_g1;TRINITY_DN619_c0_g1;TRINITY_DN632_c0_g1;TRINITY_DN779_c2_g1;TRINITY_DN784_c0_g1;TRINITY_DN785_c2_g…
Insulin signaling pathway	Endocrine system	Organismal Systems	79	K07187;K00688;K07194;K06279;K17447;K04527;K00922;K02833;K06277;K04372;K01946;K00871;K04688;K04366;K03099;K06276;K06069;K00693;K07207;K07209;K07195;K04456;K07190;K04368;K04369;K15909;K04440;K07191;K07206;K17453;K07197;K03259;K01596;K07827;K00844;K02649;K06269;K00665;K04696;K06086;K07201;K16172;K04375;K04739;K07208;K04365;K05696;K02158;K04438;K07205;K13296;K04694;K07199;K07193;K05695;K04707;K04371;…	258	TRINITY_DN70_c0_g2;TRINITY_DN69_c2_g2;TRINITY_DN69_c2_g1;TRINITY_DN75_c0_g1;TRINITY_DN25_c0_g1;TRINITY_DN25_c0_g2;TRINITY_DN164_c1_g1;TRINITY_DN152_c0_g2;TRINITY_DN203_c0_g3;TRINITY_DN371_c0_g1;TRINITY_DN356_c0_g1;TRINITY_DN466_c2_g1;TRINITY_DN436_c0_g2;TRINITY_DN528_c7_g1;TRINITY_DN552_c0_g1;TRINITY_DN601_c4_g1;TRINITY_DN613_c9_g1;TRINITY_DN619_c0_g1;TRINITY_DN641_c3_g1;TRINITY_DN632_c0_g1;TRINI…
Tuberculosis	Infectious diseases: Bacterial	Human Diseases	95	K04498;K07887;K13377;K10048;K08066;K04718;K12478;K04441;K14958;K04383;K14957;K04366;K05482;K02154;K04043;K03990;K04456;K03661;K04726;K02187;K06528;K02373;K04348;K04440;K06752;K06560;K10049;K08862;K06462;K02580;K08738;K06563;K04077;K04515;K02161;K02144;K07368;K03662;K04731;K08061;K05133;K07889;K13375;K13376;K08063;K02158;K04398;K02084;K10169;K05405;K11217;K07532;K05704;K04371;K05132;K08846;K12560;…	258	TRINITY_DN165_c1_g2;TRINITY_DN124_c0_g1;TRINITY_DN156_c1_g2;TRINITY_DN265_c0_g1;TRINITY_DN322_c3_g1;TRINITY_DN362_c0_g1;TRINITY_DN469_c1_g1;TRINITY_DN538_c1_g1;TRINITY_DN584_c0_g1;TRINITY_DN645_c0_g1;TRINITY_DN645_c0_g2;TRINITY_DN686_c0_g1;TRINITY_DN651_c0_g1;TRINITY_DN619_c0_g1;TRINITY_DN770_c0_g1;TRINITY_DN775_c0_g1;TRINITY_DN775_c0_g2;TRINITY_DN775_c0_g3;TRINITY_DN898_c1_g1;TRINITY_DN898_c0_g1…
Necroptosis	Cell growth and death	Cellular Processes	81	K00688;K05864;K16060;K15637;K04722;K11224;K13625;K04383;K11251;K05130;K04727;K09849;K04726;K04725;K15041;K11221;K11974;K02373;K08847;K12197;K11219;K04440;K15053;K12196;K03767;K11218;K03173;K11225;K15040;K16342;K10630;K04079;K04515;K08601;K02161;K04724;K12193;K12198;K05133;K10798;K04390;K12799;K03853;K16195;K04398;K01367;K17065;K11859;K11217;K12967;K05132;K08849;K04692;K04982;K12800;K02861;K05863;…	257	TRINITY_DN69_c2_g2;TRINITY_DN69_c2_g1;TRINITY_DN180_c1_g1;TRINITY_DN111_c2_g1;TRINITY_DN237_c0_g4;TRINITY_DN237_c0_g2;TRINITY_DN264_c2_g2;TRINITY_DN455_c2_g1;TRINITY_DN583_c0_g1;TRINITY_DN581_c0_g1;TRINITY_DN601_c4_g1;TRINITY_DN645_c0_g1;TRINITY_DN645_c0_g2;TRINITY_DN641_c3_g1;TRINITY_DN669_c0_g1;TRINITY_DN725_c0_g1;TRINITY_DN1022_c0_g1;TRINITY_DN1186_c0_g1;TRINITY_DN1148_c3_g1;TRINITY_DN1112_c1_…
Lysosome	Transport and catabolism	Cellular Processes	91	K12347;K12311;K04992;K01137;K12396;K12393;K01205;K12387;K01074;K10089;K10087;K06564;K12307;K12390;K12389;K12373;K01371;K02154;K12309;K01444;K03661;K12398;K12401;K01373;K12316;K12301;K06528;K01382;K01204;K12381;K14410;K01369;K01132;K12397;K12388;K12386;K01365;K12394;K06546;K02144;K03662;K12382;K06501;K12392;K01366;K04646;K01275;K12305;K05642;K01202;K09600;K06497;K12385;K12391;K13444;K12395;K12348;…	257	TRINITY_DN83_c1_g1;TRINITY_DN86_c2_g1;TRINITY_DN94_c0_g1;TRINITY_DN33_c2_g1;TRINITY_DN144_c0_g1;TRINITY_DN306_c2_g1;TRINITY_DN308_c0_g1;TRINITY_DN451_c0_g1;TRINITY_DN414_c0_g1;TRINITY_DN434_c0_g2;TRINITY_DN503_c2_g1;TRINITY_DN582_c0_g2;TRINITY_DN602_c1_g1;TRINITY_DN642_c0_g1;TRINITY_DN708_c0_g1;TRINITY_DN739_c0_g1;TRINITY_DN714_c1_g1;TRINITY_DN775_c0_g1;TRINITY_DN775_c0_g2;TRINITY_DN775_c0_g3;TRI…
Glycosaminoglycan binding proteins	Protein families: signaling and cellular processes	Brite Hierarchies	108	K04362;K04358;K04524;K06823;K19721;K06843;K00444;K13769;K06252;K04662;K06236;K19012;K05849;K10077;K06850;K16631;K06238;K19019;K06237;K16857;K06267;K03982;K05462;K05408;K19020;K19018;K18497;K05093;K05448;K07964;K03909;K06838;K04359;K14624;K01313;K05455;K04520;K13375;K06251;K05717;K13376;K09782;K04659;K15414;K05460;K01197;K01384;K16643;K06491;K12671;K00182;K06795;K19720;K01327;K00572;K00445;K06496;…	257	TRINITY_DN86_c3_g1;TRINITY_DN86_c3_g3;TRINITY_DN86_c3_g4;TRINITY_DN153_c1_g1;TRINITY_DN132_c0_g2;TRINITY_DN184_c1_g1;TRINITY_DN172_c1_g2;TRINITY_DN276_c0_g2;TRINITY_DN217_c11_g1;TRINITY_DN217_c0_g3;TRINITY_DN314_c1_g1;TRINITY_DN324_c0_g1;TRINITY_DN512_c0_g2;TRINITY_DN578_c0_g1;TRINITY_DN678_c0_g1;TRINITY_DN665_c6_g1;TRINITY_DN611_c3_g1;TRINITY_DN705_c2_g1;TRINITY_DN751_c1_g2;TRINITY_DN821_c0_g1;T…
AMPK signaling pathway	Signal transduction	Environmental Information Processing	77	K07187;K00850;K05062;K04527;K08765;K00922;K04354;K11584;K08271;K11583;K04382;K13088;K07298;K01946;K04688;K16184;K06276;K00693;K19523;K07207;K03456;K04456;K04427;K07296;K07877;K08272;K16333;K07297;K18341;K09048;K19524;K07191;K07206;K07197;K07881;K17532;K00507;K01596;K02649;K00665;K07359;K07905;K07201;K09408;K16172;K07208;K05459;K07205;K07903;K07199;K01578;K01084;K07198;K04503;K07188;K11262;K01103;…	257	TRINITY_DN70_c0_g2;TRINITY_DN20_c0_g1;TRINITY_DN20_c0_g2;TRINITY_DN20_c0_g3;TRINITY_DN13_c0_g1;TRINITY_DN164_c1_g1;TRINITY_DN123_c0_g1;TRINITY_DN152_c0_g2;TRINITY_DN176_c4_g1;TRINITY_DN191_c2_g1;TRINITY_DN202_c1_g1;TRINITY_DN202_c0_g1;TRINITY_DN297_c3_g1;TRINITY_DN297_c8_g1;TRINITY_DN217_c2_g1;TRINITY_DN387_c2_g1;TRINITY_DN354_c6_g1;TRINITY_DN452_c0_g1;TRINITY_DN489_c0_g1;TRINITY_DN436_c0_g2;TRIN…
Neuroactive ligand-receptor interaction	Signaling molecules and interaction	Environmental Information Processing	189	K05062;K04615;K04278;K04292;K04812;K05199;K04289;K04297;K04296;K04272;K04577;K05214;K05218;K08362;K05212;K04147;K05211;K04248;K04143;K05204;K05198;K01313;K04306;K05081;K04173;K05225;K05080;K04274;K04290;K05238;K04589;K05219;K04229;K04197;K04009;K04174;K04275;K05197;K04581;K04585;K05239;K05215;K04237;K03915;K04587;K04204;K04135;K04813;K04815;K04588;K04161;K05547;K04277;K05202;K04207;K04608;K04264;…	256	TRINITY_DN13_c0_g1;TRINITY_DN48_c1_g1;TRINITY_DN204_c1_g1;TRINITY_DN465_c4_g1;TRINITY_DN467_c0_g1;TRINITY_DN501_c3_g1;TRINITY_DN566_c0_g1;TRINITY_DN1035_c0_g1;TRINITY_DN1005_c0_g1;TRINITY_DN1374_c0_g1;TRINITY_DN1753_c0_g1;TRINITY_DN1805_c1_g1;TRINITY_DN1921_c0_g3;TRINITY_DN1921_c1_g2;TRINITY_DN2036_c2_g1;TRINITY_DN2123_c1_g3;TRINITY_DN2123_c1_g2;TRINITY_DN2123_c1_g1;TRINITY_DN2123_c2_g1;TRINITY_D…
Hepatitis B	Infectious diseases: Viral	Human Diseases	95	K05411;K12646;K00922;K04498;K13377;K06624;K02833;K10140;K16197;K04416;K11224;K06625;K12648;K04366;K04501;K05130;K04802;K07209;K04377;K04456;K06255;K05410;K02187;K07211;K15041;K11221;K02089;K04446;K04368;K04369;K02373;K09048;K11594;K04440;K04674;K02206;K04734;K01110;K02580;K11225;K10610;K07210;K08738;K17334;K06626;K07827;K02161;K02649;K05871;K03662;K12497;K04375;K04390;K13375;K04451;K13376;K02158;…	250	TRINITY_DN15_c0_g1;TRINITY_DN45_c0_g1;TRINITY_DN152_c0_g2;TRINITY_DN165_c1_g2;TRINITY_DN156_c1_g2;TRINITY_DN201_c0_g1;TRINITY_DN203_c0_g3;TRINITY_DN346_c1_g1;TRINITY_DN306_c1_g1;TRINITY_DN333_c0_g1;TRINITY_DN583_c0_g1;TRINITY_DN543_c0_g2;TRINITY_DN675_c0_g1;TRINITY_DN619_c0_g1;TRINITY_DN762_c0_g1;TRINITY_DN725_c0_g1;TRINITY_DN795_c0_g1;TRINITY_DN798_c5_g1;TRINITY_DN842_c0_g1;TRINITY_DN939_c0_g2;T…
Autophagy - animal	Transport and catabolism	Cellular Processes	82	K07187;K08337;K00922;K08269;K17906;K02833;K04382;K07298;K08331;K04688;K19330;K16184;K04366;K17908;K17907;K06276;K03237;K07207;K04456;K04427;K17890;K16196;K08342;K08852;K06528;K04368;K04369;K08803;K04440;K07206;K17985;K16186;K15464;K01110;K08334;K06068;K17589;K07827;K04570;K11248;K02161;K04724;K01365;K02649;K07359;K16185;K16172;K08270;K07208;K08341;K04958;K02158;K08339;K08491;K04371;K08268;K07198;…	250	TRINITY_DN70_c0_g2;TRINITY_DN29_c5_g1;TRINITY_DN152_c0_g2;TRINITY_DN270_c0_g1;TRINITY_DN270_c0_g2;TRINITY_DN203_c0_g3;TRINITY_DN387_c2_g1;TRINITY_DN452_c0_g1;TRINITY_DN409_c0_g1;TRINITY_DN417_c0_g1;TRINITY_DN540_c0_g3;TRINITY_DN552_c0_g1;TRINITY_DN572_c0_g1;TRINITY_DN681_c0_g1;TRINITY_DN619_c0_g1;TRINITY_DN632_c1_g1;TRINITY_DN615_c0_g1;TRINITY_DN779_c2_g1;TRINITY_DN784_c0_g2;TRINITY_DN802_c0_g1;T…
Sphingolipid signaling pathway	Signal transduction	Environmental Information Processing	70	K04346;K04634;K00922;K04354;K11584;K18953;K04639;K11583;K02833;K04382;K07861;K04718;K04292;K04441;K05665;K04366;K04630;K04426;K06276;K00654;K03456;K04456;K04710;K04726;K08091;K04368;K04369;K01115;K17388;K04392;K04440;K01110;K18050;K02580;K03173;K12349;K07827;K02161;K04716;K04514;K02649;K04717;K04451;K05858;K04290;K04371;K01441;K12348;K04513;K18952;K03158;K05703;K01634;K01379;K07860;K02677;K04714;…	250	TRINITY_DN22_c0_g5;TRINITY_DN22_c0_g3;TRINITY_DN152_c0_g2;TRINITY_DN191_c2_g1;TRINITY_DN202_c1_g1;TRINITY_DN202_c0_g1;TRINITY_DN230_c5_g1;TRINITY_DN251_c9_g1;TRINITY_DN217_c2_g1;TRINITY_DN203_c0_g3;TRINITY_DN387_c2_g1;TRINITY_DN367_c0_g1;TRINITY_DN362_c0_g1;TRINITY_DN489_c0_g1;TRINITY_DN465_c4_g1;TRINITY_DN485_c1_g1;TRINITY_DN538_c1_g1;TRINITY_DN674_c2_g1;TRINITY_DN686_c0_g1;TRINITY_DN619_c0_g1;T…
Gastric cancer	Cancers: Specific types	Human Diseases	90	K06279;K17447;K04358;K00922;K13377;K06624;K02432;K00444;K02833;K10140;K03096;K02353;K06625;K04688;K04366;K03099;K04501;K02620;K04491;K04377;K04456;K04500;K04368;K04369;K04685;K04674;K03511;K02206;K18497;K05093;K08528;K04402;K05689;K08957;K06626;K07827;K02161;K08734;K02649;K09593;K13375;K05083;K04365;K04451;K13376;K03068;K04388;K04371;K05658;K04357;K04503;K14021;K05460;K05099;K02354;K01384;K11126;…	247	TRINITY_DN25_c0_g1;TRINITY_DN25_c0_g2;TRINITY_DN153_c1_g1;TRINITY_DN152_c0_g2;TRINITY_DN156_c1_g2;TRINITY_DN201_c0_g1;TRINITY_DN240_c0_g1;TRINITY_DN217_c11_g1;TRINITY_DN217_c0_g3;TRINITY_DN203_c0_g3;TRINITY_DN346_c1_g1;TRINITY_DN391_c0_g1;TRINITY_DN562_c1_g2;TRINITY_DN543_c0_g2;TRINITY_DN552_c0_g1;TRINITY_DN619_c0_g1;TRINITY_DN632_c0_g1;TRINITY_DN762_c0_g1;TRINITY_DN876_c1_g1;TRINITY_DN895_c0_g1;…
Transcriptional misregulation in cancer	Cancers: Overview	Human Diseases	125	K15627;K09186;K15617;K15184;K13209;K11253;K06624;K10048;K11459;K10138;K06067;K10140;K09063;K14242;K08854;K05199;K06625;K14651;K09234;K09105;K15612;K02633;K10500;K15619;K04377;K15379;K12823;K11424;K15605;K09293;K06622;K15188;K05090;K03511;K15593;K04402;K11427;K02580;K09633;K10054;K14970;K04570;K04359;K09455;K04453;K09435;K09436;K15592;K07201;K04684;K08821;K05096;K09035;K04454;K15623;K01353;K04376;…	246	TRINITY_DN12_c0_g1;TRINITY_DN13_c2_g2;TRINITY_DN13_c2_g1;TRINITY_DN115_c0_g2;TRINITY_DN133_c1_g2;TRINITY_DN176_c0_g1;TRINITY_DN297_c1_g1;TRINITY_DN201_c0_g1;TRINITY_DN265_c0_g1;TRINITY_DN203_c1_g1;TRINITY_DN352_c4_g1;TRINITY_DN307_c2_g1;TRINITY_DN346_c1_g1;TRINITY_DN460_c0_g1;TRINITY_DN491_c0_g1;TRINITY_DN463_c1_g1;TRINITY_DN537_c0_g1;TRINITY_DN501_c3_g1;TRINITY_DN543_c0_g2;TRINITY_DN674_c0_g4;TR…
Apoptosis	Cell growth and death	Cellular Processes	87	K04737;K12641;K07611;K00922;K16060;K04960;K02833;K04738;K04722;K04366;K04426;K06276;K01371;K03237;K02310;K07209;K04456;K04727;K02374;K04726;K04725;K08852;K02187;K01373;K04368;K04369;K06114;K02373;K04440;K04734;K04402;K10130;K02580;K03173;K04959;K07210;K08738;K02539;K07827;K04570;K02161;K04724;K01365;K02649;K01366;K10798;K07374;K01275;K01353;K04390;K04397;K04451;K04958;K03853;K02158;K04398;K01367;…	246	TRINITY_DN54_c0_g1;TRINITY_DN74_c0_g1;TRINITY_DN74_c0_g2;TRINITY_DN74_c0_g3;TRINITY_DN152_c0_g2;TRINITY_DN111_c2_g1;TRINITY_DN296_c3_g1;TRINITY_DN203_c0_g3;TRINITY_DN264_c2_g2;TRINITY_DN364_c0_g1;TRINITY_DN455_c2_g1;TRINITY_DN619_c0_g1;TRINITY_DN611_c4_g1;TRINITY_DN779_c2_g1;TRINITY_DN714_c1_g1;TRINITY_DN784_c0_g2;TRINITY_DN742_c0_g1;TRINITY_DN842_c0_g1;TRINITY_DN944_c0_g1;TRINITY_DN944_c0_g2;TRI…
Apelin signaling pathway	Signal transduction	Environmental Information Processing	87	K04634;K04542;K05742;K04960;K04963;K04639;K02833;K04718;K04688;K05849;K04366;K04630;K04501;K04456;K08046;K08045;K04500;K04368;K04369;K08044;K04674;K03982;K04536;K08334;K18050;K05689;K04959;K12313;K06827;K07827;K06052;K11406;K00907;K09203;K09262;K04454;K04549;K08341;K05858;K04958;K04538;K05225;K13296;K07199;K04371;K07198;K17845;K04503;K07829;K11831;K04174;K09260;K07830;K08333;K07826;K07188;K08042;…	243	TRINITY_DN22_c0_g3;TRINITY_DN43_c0_g2;TRINITY_DN157_c0_g1;TRINITY_DN296_c3_g1;TRINITY_DN258_c7_g1;TRINITY_DN251_c9_g1;TRINITY_DN203_c0_g3;TRINITY_DN362_c0_g1;TRINITY_DN485_c1_g1;TRINITY_DN552_c0_g1;TRINITY_DN686_c0_g1;TRINITY_DN665_c6_g1;TRINITY_DN619_c0_g1;TRINITY_DN653_c0_g2;TRINITY_DN762_c0_g1;TRINITY_DN944_c0_g1;TRINITY_DN944_c0_g2;TRINITY_DN956_c1_g1;TRINITY_DN1003_c1_g1;TRINITY_DN1102_c0_g2…
Cushing syndrome	Endocrine and metabolic diseases	Human Diseases	108	K04635;K04634;K09186;K12473;K04960;K06624;K02432;K00444;K09187;K04855;K02353;K14961;K06625;K04630;K04914;K02620;K04491;K08046;K08045;K13885;K04854;K00513;K02089;K07836;K04353;K04368;K04369;K04685;K16931;K09048;K08044;K06622;K02206;K04465;K17767;K04959;K06626;K14970;K04515;K08560;K18437;K04684;K04365;K05858;K04851;K14964;K04958;K06621;K09097;K11839;K04371;K09355;K00497;K04503;K02354;K01384;K04913;…	242	TRINITY_DN22_c0_g1;TRINITY_DN22_c0_g3;TRINITY_DN13_c2_g2;TRINITY_DN13_c2_g1;TRINITY_DN192_c2_g1;TRINITY_DN296_c3_g1;TRINITY_DN201_c0_g1;TRINITY_DN240_c0_g1;TRINITY_DN217_c11_g1;TRINITY_DN217_c0_g3;TRINITY_DN463_c0_g1;TRINITY_DN485_c1_g1;TRINITY_DN455_c0_g1;TRINITY_DN562_c1_g2;TRINITY_DN529_c0_g1;TRINITY_DN543_c0_g2;TRINITY_DN653_c0_g2;TRINITY_DN739_c0_g5;TRINITY_DN876_c1_g1;TRINITY_DN895_c0_g1;TR…
Hepatitis C	Infectious diseases: Viral	Human Diseases	65	K05411;K12646;K12473;K00922;K06087;K04354;K02833;K04382;K04441;K06625;K14216;K12648;K04366;K03099;K06088;K06276;K03237;K05130;K07209;K03456;K04456;K16196;K13885;K05410;K07211;K11221;K04706;K11219;K04440;K08536;K04734;K02580;K03173;K07210;K03250;K07827;K02649;K04696;K01165;K04365;K04451;K16195;K02158;K14217;K11217;K03174;K09444;K16194;K04371;K04692;K04357;K02861;K04467;K05414;K03158;K08860;K05131;…	241	TRINITY_DN15_c0_g1;TRINITY_DN45_c0_g1;TRINITY_DN192_c2_g1;TRINITY_DN152_c0_g2;TRINITY_DN110_c0_g1;TRINITY_DN191_c2_g1;TRINITY_DN203_c0_g3;TRINITY_DN387_c2_g1;TRINITY_DN538_c1_g1;TRINITY_DN543_c0_g2;TRINITY_DN579_c0_g1;TRINITY_DN579_c0_g3;TRINITY_DN667_c0_g1;TRINITY_DN675_c0_g1;TRINITY_DN619_c0_g1;TRINITY_DN632_c0_g1;TRINITY_DN632_c3_g2;TRINITY_DN741_c0_g1;TRINITY_DN779_c2_g1;TRINITY_DN784_c0_g2;T…
Cell cycle	Cell growth and death	Cellular Processes	102	K03094;K06645;K06669;K04498;K13377;K06624;K06670;K06067;K03351;K16197;K03353;K06625;K03352;K04501;K04802;K03348;K10500;K04377;K06635;K04682;K04500;K02089;K16198;K06639;K02603;K09392;K02605;K04685;K02210;K06622;K02206;K02606;K04402;K06632;K06619;K06626;K16332;K03347;K06630;K03364;K03349;K06640;K06633;K10152;K06636;K10151;K13375;K02202;K03868;K06631;K04451;K13376;K06621;K03354;K03355;K02542;K04728;…	238	TRINITY_DN85_c0_g1;TRINITY_DN0_c28_g2;TRINITY_DN31_c0_g1;TRINITY_DN165_c1_g2;TRINITY_DN156_c1_g2;TRINITY_DN201_c0_g1;TRINITY_DN352_c3_g1;TRINITY_DN307_c2_g1;TRINITY_DN367_c3_g1;TRINITY_DN306_c1_g1;TRINITY_DN434_c1_g1;TRINITY_DN543_c0_g2;TRINITY_DN684_c0_g1;TRINITY_DN762_c0_g1;TRINITY_DN795_c0_g1;TRINITY_DN788_c1_g3;TRINITY_DN788_c1_g1;TRINITY_DN934_c0_g1;TRINITY_DN939_c0_g2;TRINITY_DN1177_c0_g2;T…
Wnt signaling pathway	Signal transduction	Environmental Information Processing	86	K03094;K04498;K02432;K00444;K07861;K03096;K03115;K03362;K04505;K02353;K04512;K04501;K04499;K00181;K02620;K04491;K04377;K04494;K04427;K04446;K03345;K04506;K04348;K17388;K04392;K04440;K04508;K08957;K17334;K03097;K04515;K03347;K02166;K08960;K10152;K10151;K03868;K04451;K05858;K03068;K04503;K06268;K02354;K01384;K04513;K02185;K00182;K02842;K02329;K04511;K02235;K04495;K19614;K00572;K00445;K04345;K07860;…	236	TRINITY_DN85_c0_g1;TRINITY_DN165_c1_g2;TRINITY_DN240_c0_g1;TRINITY_DN217_c11_g1;TRINITY_DN217_c0_g3;TRINITY_DN367_c0_g1;TRINITY_DN391_c0_g1;TRINITY_DN332_c0_g1;TRINITY_DN332_c1_g1;TRINITY_DN494_c2_g2;TRINITY_DN562_c1_g2;TRINITY_DN546_c4_g1;TRINITY_DN762_c0_g1;TRINITY_DN746_c1_g2;TRINITY_DN745_c0_g1;TRINITY_DN876_c1_g1;TRINITY_DN895_c0_g1;TRINITY_DN939_c0_g2;TRINITY_DN980_c0_g2;TRINITY_DN906_c1_g2…
Cytokine-cytokine receptor interaction	Signaling molecules and interaction	Environmental Information Processing	180	K04737;K05504;K05062;K05066;K13377;K04738;K04185;K04722;K04662;K05496;K04383;K05482;K05130;K04182;K03159;K05060;K05492;K05510;K04674;K05090;K05408;K05079;K05164;K05419;K05156;K05144;K05055;K14624;K05433;K05141;K10035;K05476;K05140;K05070;K06854;K05068;K05133;K05420;K05514;K05081;K04186;K04390;K13375;K05163;K05058;K13376;K04673;K05147;K05497;K05061;K05076;K05505;K05405;K05475;K04664;K05074;K05080;…	235	TRINITY_DN54_c0_g1;TRINITY_DN98_c1_g5;TRINITY_DN13_c0_g1;TRINITY_DN138_c0_g1;TRINITY_DN156_c1_g2;TRINITY_DN364_c0_g1;TRINITY_DN365_c0_g2;TRINITY_DN455_c2_g1;TRINITY_DN512_c0_g2;TRINITY_DN594_c2_g1;TRINITY_DN645_c0_g1;TRINITY_DN645_c0_g2;TRINITY_DN770_c0_g1;TRINITY_DN725_c0_g1;TRINITY_DN949_c1_g1;TRINITY_DN1108_c0_g1;TRINITY_DN1275_c0_g1;TRINITY_DN1275_c0_g2;TRINITY_DN1275_c0_g3;TRINITY_DN1348_c0_…
Adrenergic signaling in cardiomyocytes	Circulatory system	Organismal Systems	78	K04634;K05742;K04354;K11584;K01539;K11583;K04382;K05850;K04441;K04630;K04848;K01540;K03456;K04456;K08046;K08045;K09048;K08044;K09052;K04859;K08014;K04845;K04894;K04515;K02161;K06269;K10375;K01538;K17751;K04445;K05858;K04851;K04872;K04371;K08042;K04962;K05870;K04345;K04135;K04351;K04450;K04863;K02677;K04860;K04858;K04850;K12314;K04374;K12045;K09047;K04167;K04137;K08041;K05865;K05852;K04632;K04864;…	234	TRINITY_DN22_c0_g3;TRINITY_DN157_c0_g1;TRINITY_DN191_c2_g1;TRINITY_DN202_c1_g1;TRINITY_DN202_c0_g1;TRINITY_DN271_c0_g1;TRINITY_DN271_c0_g3;TRINITY_DN217_c2_g1;TRINITY_DN387_c2_g1;TRINITY_DN378_c0_g1;TRINITY_DN489_c0_g1;TRINITY_DN485_c1_g1;TRINITY_DN538_c1_g1;TRINITY_DN632_c3_g2;TRINITY_DN653_c0_g2;TRINITY_DN671_c4_g1;TRINITY_DN843_c3_g2;TRINITY_DN914_c1_g1;TRINITY_DN999_c0_g2;TRINITY_DN944_c0_g1;…
Dopaminergic synapse	Nervous system	Organismal Systems	70	K04634;K04542;K04354;K04960;K11584;K10396;K11583;K04382;K04441;K05199;K04630;K08822;K00545;K03456;K04456;K08045;K02223;K04348;K09048;K04440;K00274;K04536;K04959;K04515;K04147;K04344;K06269;K05198;K04849;K04549;K04534;K05858;K04851;K04958;K04538;K04633;K05197;K07826;K05870;K04345;K04999;K04539;K04450;K04545;K02677;K04850;K04374;K05200;K09047;K19663;K04632;K04833;K07825;K04537;K04541;K02296;K03083;…	234	TRINITY_DN22_c0_g3;TRINITY_DN43_c0_g2;TRINITY_DN191_c2_g1;TRINITY_DN296_c3_g1;TRINITY_DN202_c1_g1;TRINITY_DN202_c0_g1;TRINITY_DN297_c0_g1;TRINITY_DN217_c2_g1;TRINITY_DN387_c2_g1;TRINITY_DN489_c0_g1;TRINITY_DN485_c1_g1;TRINITY_DN538_c1_g1;TRINITY_DN501_c3_g1;TRINITY_DN632_c3_g2;TRINITY_DN653_c0_g2;TRINITY_DN827_c0_g1;TRINITY_DN843_c3_g2;TRINITY_DN863_c0_g1;TRINITY_DN999_c0_g2;TRINITY_DN944_c0_g1;T…
Vascular smooth muscle contraction	Circulatory system	Organismal Systems	84	K12323;K04346;K04635;K04634;K06270;K04960;K04639;K12331;K04366;K12330;K07376;K12324;K08046;K08045;K12336;K04368;K04369;K17388;K08044;K12328;K16343;K04577;K06068;K18050;K04959;K12313;K16342;K04514;K00907;K06269;K12755;K08448;K04365;K05858;K04851;K04958;K12329;K07532;K08449;K04371;K04197;K16366;K12327;K04513;K04937;K08042;K04936;K04345;K12333;K04135;K17457;K02677;K04850;K12315;K04263;K05274;K01047;…	234	TRINITY_DN60_c3_g1;TRINITY_DN22_c0_g5;TRINITY_DN22_c0_g1;TRINITY_DN22_c0_g3;TRINITY_DN1_c0_g1;TRINITY_DN296_c3_g1;TRINITY_DN251_c9_g1;TRINITY_DN416_c0_g1;TRINITY_DN485_c1_g1;TRINITY_DN619_c0_g1;TRINITY_DN609_c0_g1;TRINITY_DN804_c1_g1;TRINITY_DN902_c0_g3;TRINITY_DN956_c1_g1;TRINITY_DN1003_c1_g1;TRINITY_DN1203_c0_g3;TRINITY_DN1216_c0_g1;TRINITY_DN1216_c0_g2;TRINITY_DN1342_c1_g1;TRINITY_DN1481_c0_g1…
Pyrimidine metabolism	Nucleotide metabolism	Metabolism	84	K03010;K03026;K02324;K00876;K03022;K01081;K01937;K03006;K03783;K03016;K00254;K01513;K02327;K00560;K03005;K01511;K01520;K01489;K03024;K02999;K03021;K00758;K12305;K03009;K02328;K03004;K01493;K10808;K00940;K03015;K03000;K00962;K03008;K13421;K02325;K14721;K18533;K03023;K11540;K02326;K01510;K00757;K03025;K10807;K03013;K03018;K03011;K00610;K00609;K03019;K01464;K09018;K13809;K03002;K16904;K03012;K00893;…	227	TRINITY_DN55_c3_g2;TRINITY_DN307_c1_g1;TRINITY_DN326_c0_g1;TRINITY_DN446_c0_g1;TRINITY_DN688_c1_g1;TRINITY_DN679_c0_g1;TRINITY_DN679_c2_g1;TRINITY_DN717_c0_g2;TRINITY_DN890_c0_g1;TRINITY_DN890_c0_g3;TRINITY_DN891_c0_g1;TRINITY_DN891_c0_g2;TRINITY_DN909_c0_g4;TRINITY_DN1014_c0_g1;TRINITY_DN1092_c0_g4;TRINITY_DN1092_c0_g1;TRINITY_DN1189_c3_g1;TRINITY_DN1156_c2_g1;TRINITY_DN1127_c0_g1;TRINITY_DN1265…
Breast cancer	Cancers: Specific types	Human Diseases	89	K04362;K06279;K17447;K04358;K00922;K02432;K00444;K02833;K10140;K03096;K02353;K06625;K04688;K04366;K03099;K02620;K04491;K04377;K04456;K02089;K04368;K04369;K02599;K03511;K18497;K01110;K04402;K04469;K08957;K07827;K05097;K08556;K06052;K02649;K08775;K04684;K09101;K05083;K04365;K04451;K03068;K05459;K08551;K11256;K04371;K06051;K04357;K04503;K14021;K02354;K01384;K02091;K00182;K02842;K02329;K02235;K05091;…	224	TRINITY_DN86_c3_g1;TRINITY_DN86_c3_g3;TRINITY_DN86_c3_g4;TRINITY_DN25_c0_g1;TRINITY_DN25_c0_g2;TRINITY_DN153_c1_g1;TRINITY_DN152_c0_g2;TRINITY_DN240_c0_g1;TRINITY_DN217_c11_g1;TRINITY_DN217_c0_g3;TRINITY_DN203_c0_g3;TRINITY_DN346_c1_g1;TRINITY_DN391_c0_g1;TRINITY_DN562_c1_g2;TRINITY_DN543_c0_g2;TRINITY_DN552_c0_g1;TRINITY_DN619_c0_g1;TRINITY_DN632_c0_g1;TRINITY_DN876_c1_g1;TRINITY_DN895_c0_g1;TRI…
FoxO signaling pathway	Signal transduction	Environmental Information Processing	88	K07187;K04527;K00922;K04498;K13377;K06624;K02833;K13302;K07298;K04441;K06625;K08861;K04366;K03099;K04501;K06276;K11838;K15010;K07209;K04456;K04500;K04368;K04369;K04685;K04440;K07191;K11431;K04674;K02206;K15464;K08862;K01110;K04402;K01596;K11434;K07827;K16332;K04411;K17848;K02649;K07201;K09408;K13304;K16172;K04564;K08960;K10151;K08341;K13375;K06631;K04365;K13376;K15618;K10146;K05459;K05405;K10305;…	223	TRINITY_DN70_c0_g2;TRINITY_DN164_c1_g1;TRINITY_DN152_c0_g2;TRINITY_DN165_c1_g2;TRINITY_DN156_c1_g2;TRINITY_DN201_c0_g1;TRINITY_DN203_c0_g3;TRINITY_DN283_c0_g1;TRINITY_DN452_c0_g1;TRINITY_DN538_c1_g1;TRINITY_DN543_c0_g2;TRINITY_DN502_c0_g1;TRINITY_DN619_c0_g1;TRINITY_DN632_c0_g1;TRINITY_DN762_c0_g1;TRINITY_DN779_c2_g1;TRINITY_DN764_c3_g1;TRINITY_DN847_c3_g1;TRINITY_DN842_c0_g1;TRINITY_DN944_c0_g1;…
Signaling pathways regulating pluripotency of stem cells	Cellular community - eukaryotes	Cellular Processes	96	K04362;K05094;K05095;K10177;K00922;K16790;K02432;K00444;K18498;K02833;K11459;K14439;K09063;K11460;K04662;K04441;K02353;K17846;K04366;K04501;K11489;K04377;K04456;K04500;K05060;K04368;K04369;K17694;K18497;K05093;K11218;K05419;K07827;K02649;K09378;K18487;K09222;K11138;K05058;K11487;K04673;K11478;K17695;K05459;K11217;K04371;K08036;K04670;K04692;K17693;K04680;K04676;K02354;K01384;K04667;K00182;K02842;…	222	TRINITY_DN86_c3_g1;TRINITY_DN86_c3_g3;TRINITY_DN86_c3_g2;TRINITY_DN86_c3_g4;TRINITY_DN86_c1_g1;TRINITY_DN45_c1_g1;TRINITY_DN152_c0_g2;TRINITY_DN244_c0_g1;TRINITY_DN240_c0_g1;TRINITY_DN217_c11_g1;TRINITY_DN217_c0_g3;TRINITY_DN203_c0_g2;TRINITY_DN203_c0_g3;TRINITY_DN203_c1_g1;TRINITY_DN426_c1_g1;TRINITY_DN460_c0_g1;TRINITY_DN459_c2_g1;TRINITY_DN512_c0_g2;TRINITY_DN538_c1_g1;TRINITY_DN562_c1_g2;TRIN…
Thyroid hormone signaling pathway	Endocrine system	Organismal Systems	74	K15162;K08231;K00922;K04498;K15144;K05742;K15146;K01539;K02833;K17902;K06062;K11404;K06067;K09183;K04662;K04366;K06276;K05857;K15167;K07207;K01540;K04377;K04456;K15133;K04368;K04369;K08187;K02599;K08747;K07754;K06493;K08362;K07827;K02649;K01116;K07201;K15156;K01538;K17904;K07299;K07208;K06487;K09101;K04451;K05858;K17903;K02158;K15164;K05692;K05704;K11256;K04371;K11644;K08268;K04503;K17901;K05860;…	221	TRINITY_DN62_c0_g1;TRINITY_DN76_c0_g5;TRINITY_DN152_c0_g2;TRINITY_DN165_c1_g2;TRINITY_DN178_c1_g1;TRINITY_DN157_c0_g1;TRINITY_DN219_c2_g1;TRINITY_DN271_c0_g1;TRINITY_DN271_c0_g3;TRINITY_DN203_c0_g3;TRINITY_DN281_c0_g1;TRINITY_DN233_c0_g1;TRINITY_DN329_c0_g1;TRINITY_DN307_c2_g1;TRINITY_DN319_c0_g1;TRINITY_DN512_c0_g2;TRINITY_DN619_c0_g1;TRINITY_DN779_c2_g1;TRINITY_DN733_c0_g1;TRINITY_DN740_c0_g1;T…
Non-alcoholic fatty liver disease (NAFLD)	Endocrine and metabolic diseases	Human Diseases	101	K07187;K03943;K05062;K03937;K04527;K03951;K00922;K02270;K03964;K03942;K04383;K09113;K04426;K03237;K03958;K08822;K00414;K03934;K07209;K00235;K04456;K03946;K03962;K07296;K02273;K04726;K08852;K02187;K04419;K07297;K03935;K04393;K04392;K04440;K03955;K08536;K07197;K09027;K02271;K02580;K03173;K00420;K08738;K05055;K02649;K00413;K04696;K03959;K02263;K16172;K03948;K04390;K13375;K04397;K03950;K00418;K03949;…	221	TRINITY_DN70_c0_g2;TRINITY_DN3_c9_g2;TRINITY_DN13_c0_g1;TRINITY_DN112_c3_g1;TRINITY_DN164_c1_g1;TRINITY_DN199_c0_g1;TRINITY_DN152_c0_g2;TRINITY_DN297_c2_g1;TRINITY_DN444_c1_g1;TRINITY_DN468_c0_g1;TRINITY_DN645_c0_g1;TRINITY_DN645_c0_g2;TRINITY_DN679_c1_g1;TRINITY_DN611_c4_g1;TRINITY_DN784_c0_g2;TRINITY_DN864_c1_g1;TRINITY_DN827_c0_g1;TRINITY_DN894_c2_g1;TRINITY_DN819_c1_g2;TRINITY_DN819_c1_g1;TRI…
Retrograde endocannabinoid signaling	Nervous system	Organismal Systems	99	K03943;K04634;K04542;K03937;K03951;K15291;K04960;K03964;K13700;K03942;K04441;K05199;K04630;K03958;K03934;K08046;K03946;K08045;K03962;K03935;K08044;K04440;K03955;K04536;K04959;K13806;K04344;K05198;K03959;K04849;K03948;K04549;K04534;K05858;K03950;K04851;K04958;K01054;K04538;K03949;K03939;K03936;K04371;K03967;K03953;K05197;K03941;K03945;K07826;K08042;K03961;K04345;K03965;K04999;K04539;K03947;K03938;…	220	TRINITY_DN3_c9_g2;TRINITY_DN22_c0_g3;TRINITY_DN43_c0_g2;TRINITY_DN112_c3_g1;TRINITY_DN199_c0_g1;TRINITY_DN151_c2_g3;TRINITY_DN296_c3_g1;TRINITY_DN444_c1_g1;TRINITY_DN497_c1_g1;TRINITY_DN485_c1_g1;TRINITY_DN468_c0_g1;TRINITY_DN538_c1_g1;TRINITY_DN501_c3_g1;TRINITY_DN653_c0_g2;TRINITY_DN864_c1_g1;TRINITY_DN819_c1_g2;TRINITY_DN819_c1_g1;TRINITY_DN956_c1_g1;TRINITY_DN946_c2_g3;TRINITY_DN1003_c1_g1;TR…
Oocyte meiosis	Cell growth and death	Cellular Processes	67	K03094;K06669;K04960;K11584;K04382;K03351;K16197;K03362;K03353;K10318;K03352;K03348;K08557;K03456;K08046;K08045;K06635;K16198;K04368;K04348;K08044;K11481;K02206;K04959;K06626;K04515;K08556;K03347;K06630;K06269;K08836;K03349;K06633;K06636;K03868;K02602;K06631;K04958;K05459;K03354;K03355;K04371;K02365;K06268;K04373;K08042;K10292;K03363;K13728;K08694;K13054;K04345;K03350;K05868;K11580;K05867;K08041;…	220	TRINITY_DN85_c0_g1;TRINITY_DN31_c0_g1;TRINITY_DN296_c3_g1;TRINITY_DN202_c1_g1;TRINITY_DN202_c0_g1;TRINITY_DN387_c2_g1;TRINITY_DN367_c3_g1;TRINITY_DN306_c1_g1;TRINITY_DN332_c1_g1;TRINITY_DN434_c1_g1;TRINITY_DN596_c0_g1;TRINITY_DN684_c0_g1;TRINITY_DN788_c1_g3;TRINITY_DN788_c1_g1;TRINITY_DN843_c3_g2;TRINITY_DN904_c5_g1;TRINITY_DN999_c0_g2;TRINITY_DN980_c0_g2;TRINITY_DN956_c1_g1;TRINITY_DN1003_c1_g1;…
Prostate cancer	Cancers: Specific types	Human Diseases	72	K04362;K05086;K00922;K04498;K06624;K02833;K06625;K04366;K03099;K06276;K02620;K04491;K07209;K08557;K15619;K04456;K04368;K04369;K08774;K09048;K05089;K04363;K15593;K02206;K05093;K04734;K01110;K02580;K09633;K07210;K04079;K06626;K07827;K04359;K02161;K02649;K09487;K09435;K07201;K05083;K04365;K04451;K05450;K02158;K05459;K04371;K04387;K04357;K04503;K04467;K04364;K17454;K05870;K01343;K07203;K04735;K09389;…	217	TRINITY_DN86_c3_g1;TRINITY_DN86_c3_g3;TRINITY_DN86_c3_g4;TRINITY_DN164_c0_g1;TRINITY_DN164_c0_g2;TRINITY_DN152_c0_g2;TRINITY_DN165_c1_g2;TRINITY_DN201_c0_g1;TRINITY_DN203_c0_g3;TRINITY_DN543_c0_g2;TRINITY_DN619_c0_g1;TRINITY_DN632_c0_g1;TRINITY_DN779_c2_g1;TRINITY_DN876_c1_g1;TRINITY_DN895_c0_g1;TRINITY_DN842_c0_g1;TRINITY_DN904_c5_g1;TRINITY_DN969_c0_g1;TRINITY_DN969_c0_g3;TRINITY_DN944_c0_g1;TR…
Leukocyte transendothelial migration	Immune system	Organismal Systems	66	K13709;K00922;K08009;K05699;K06087;K05700;K06735;K06787;K04441;K04630;K06088;K01398;K07293;K07836;K04353;K12757;K04393;K17388;K04392;K05760;K08010;K08014;K06785;K05730;K04514;K02649;K05871;K05702;K12755;K01116;K08011;K06274;K05726;K05690;K05725;K06514;K05692;K06527;K08016;K06483;K04513;K05719;K08015;K12754;K07860;K08013;K04351;K02677;K06464;K08007;K12756;K08012;K19663;K06471;K06490;K07873;K05859;…	217	TRINITY_DN97_c2_g1;TRINITY_DN152_c0_g2;TRINITY_DN189_c1_g1;TRINITY_DN151_c6_g1;TRINITY_DN110_c0_g1;TRINITY_DN336_c0_g1;TRINITY_DN370_c1_g1;TRINITY_DN441_c2_g2;TRINITY_DN441_c2_g1;TRINITY_DN538_c1_g1;TRINITY_DN653_c0_g2;TRINITY_DN741_c0_g1;TRINITY_DN712_c9_g1;TRINITY_DN901_c8_g1;TRINITY_DN906_c2_g1;TRINITY_DN1084_c1_g1;TRINITY_DN1197_c0_g1;TRINITY_DN1264_c3_g1;TRINITY_DN1264_c5_g2;TRINITY_DN1241_c…
mRNA surveillance pathway	Translation	Genetic Information Processing	53	K14326;K04354;K12883;K11584;K11583;K04382;K14401;K14323;K14408;K12877;K13126;K06100;K12875;K12812;K03456;K15544;K14400;K14962;K03265;K08873;K13114;K11125;K14411;K11124;K14409;K14397;K14324;K14325;K14376;K12881;K14398;K06269;K03267;K14402;K12882;K14396;K14328;K14403;K15542;K12876;K14405;K06965;K14294;K14416;K00565;K14407;K14406;K14327;K14404;K14285;K14399;K13025;K14284	217	TRINITY_DN14_c0_g1;TRINITY_DN191_c2_g1;TRINITY_DN209_c0_g2;TRINITY_DN202_c1_g1;TRINITY_DN202_c0_g1;TRINITY_DN217_c2_g1;TRINITY_DN387_c2_g1;TRINITY_DN368_c0_g1;TRINITY_DN381_c2_g1;TRINITY_DN489_c0_g1;TRINITY_DN544_c0_g2;TRINITY_DN544_c0_g3;TRINITY_DN530_c1_g1;TRINITY_DN520_c2_g1;TRINITY_DN676_c0_g1;TRINITY_DN632_c3_g2;TRINITY_DN833_c0_g1;TRINITY_DN843_c3_g2;TRINITY_DN990_c4_g1;TRINITY_DN999_c0_g2;…
Estrogen signaling pathway	Endocrine system	Organismal Systems	66	K04634;K04615;K06279;K17447;K00922;K04960;K02833;K07604;K04366;K03099;K04630;K04456;K08046;K08045;K01398;K04368;K04369;K08774;K09048;K08044;K06068;K04959;K04079;K07827;K02161;K08556;K02649;K09487;K04684;K09101;K04534;K05858;K04958;K03283;K08551;K05704;K11256;K04371;K08042;K04364;K01379;K05870;K04345;K04999;K04450;K09571;K04374;K11255;K09047;K08041;K17449;K08550;K08527;K04632;K17448;K08043;K02183;…	214	TRINITY_DN22_c0_g3;TRINITY_DN48_c1_g1;TRINITY_DN25_c0_g1;TRINITY_DN25_c0_g2;TRINITY_DN152_c0_g2;TRINITY_DN296_c3_g1;TRINITY_DN203_c0_g3;TRINITY_DN485_c1_g1;TRINITY_DN560_c2_g1;TRINITY_DN619_c0_g1;TRINITY_DN632_c0_g1;TRINITY_DN653_c0_g2;TRINITY_DN944_c0_g1;TRINITY_DN944_c0_g2;TRINITY_DN906_c2_g1;TRINITY_DN956_c1_g1;TRINITY_DN1003_c1_g1;TRINITY_DN1009_c0_g1;TRINITY_DN1084_c1_g1;TRINITY_DN1216_c0_g1…
Neurotrophin signaling pathway	Nervous system	Organismal Systems	80	K06279;K17447;K00922;K02833;K12464;K06277;K04416;K04505;K04441;K04366;K03099;K04426;K06276;K04421;K07209;K04456;K12458;K04431;K07293;K07836;K04353;K04368;K04369;K12462;K04393;K04392;K04440;K04734;K06068;K02580;K12465;K12388;K06619;K12463;K07827;K04515;K02161;K06630;K02649;K04731;K01116;K09408;K05872;K16172;K09593;K04445;K04365;K04451;K02158;K04438;K07193;K04371;K12460;K08846;K02581;K04513;K04373;…	213	TRINITY_DN25_c0_g1;TRINITY_DN25_c0_g2;TRINITY_DN152_c0_g2;TRINITY_DN203_c0_g3;TRINITY_DN377_c0_g1;TRINITY_DN371_c0_g1;TRINITY_DN333_c0_g1;TRINITY_DN494_c2_g2;TRINITY_DN538_c1_g1;TRINITY_DN619_c0_g1;TRINITY_DN632_c0_g1;TRINITY_DN611_c4_g1;TRINITY_DN779_c2_g1;TRINITY_DN764_c1_g1;TRINITY_DN798_c5_g1;TRINITY_DN842_c0_g1;TRINITY_DN944_c0_g1;TRINITY_DN944_c0_g2;TRINITY_DN906_c2_g1;TRINITY_DN1080_c0_g1;…
Jak-STAT signaling pathway	Signal transduction	Environmental Information Processing	107	K04737;K05062;K05066;K00922;K04498;K02833;K04738;K04705;K11224;K06625;K04366;K03099;K00157;K05130;K04377;K04456;K16063;K07293;K11221;K05060;K05492;K04706;K11219;K05089;K04363;K05079;K11218;K11225;K04699;K05419;K02539;K05055;K04570;K04359;K02161;K05433;K02649;K05140;K05070;K04696;K06854;K05068;K05133;K05420;K10152;K05081;K10151;K16064;K05058;K05697;K05061;K05076;K05405;K05074;K05080;K05423;K11217;…	213	TRINITY_DN54_c0_g1;TRINITY_DN13_c0_g1;TRINITY_DN138_c0_g1;TRINITY_DN152_c0_g2;TRINITY_DN165_c1_g2;TRINITY_DN203_c0_g3;TRINITY_DN364_c0_g1;TRINITY_DN414_c0_g4;TRINITY_DN414_c0_g6;TRINITY_DN583_c0_g1;TRINITY_DN543_c0_g2;TRINITY_DN619_c0_g1;TRINITY_DN632_c0_g1;TRINITY_DN668_c1_g1;TRINITY_DN725_c0_g1;TRINITY_DN939_c0_g2;TRINITY_DN944_c0_g1;TRINITY_DN944_c0_g2;TRINITY_DN906_c2_g1;TRINITY_DN1199_c0_g1;…
DNA replication proteins	Protein families: genetic information processing	Brite Hierarchies	102	K11087;K02324;K11109;K11097;K10867;K11114;K03165;K10733;K11137;K04802;K11086;K03164;K11131;K11127;K11113;K03163;K17398;K11136;K10754;K02327;K11099;K02603;K02605;K02333;K02210;K10727;K11125;K02206;K11130;K10901;K02606;K11124;K10747;K00558;K06626;K07466;K10756;K03111;K10799;K10798;K10728;K10755;K11138;K02328;K10742;K10738;K10744;K11129;K11096;K02542;K04728;K15254;K02540;K02604;K17399;K10735;K11126;…	212	TRINITY_DN262_c1_g1;TRINITY_DN326_c0_g1;TRINITY_DN382_c0_g1;TRINITY_DN474_c4_g2;TRINITY_DN503_c1_g2;TRINITY_DN546_c1_g1;TRINITY_DN610_c0_g1;TRINITY_DN611_c0_g2;TRINITY_DN793_c0_g1;TRINITY_DN795_c0_g1;TRINITY_DN724_c0_g1;TRINITY_DN798_c0_g1;TRINITY_DN889_c0_g1;TRINITY_DN872_c1_g1;TRINITY_DN987_c0_g1;TRINITY_DN942_c1_g1;TRINITY_DN918_c0_g1;TRINITY_DN1042_c0_g1;TRINITY_DN1145_c0_g1;TRINITY_DN1127_c0…
HIF-1 signaling pathway	Signal transduction	Environmental Information Processing	64	K12077;K00162;K04527;K00922;K04498;K06624;K00134;K04372;K06625;K04688;K03871;K04456;K03159;K04368;K04369;K09592;K03982;K01689;K05448;K00161;K03259;K02580;K05055;K04515;K00510;K00844;K02161;K02649;K01116;K05133;K05096;K07299;K03868;K05083;K09097;K06503;K05459;K05405;K07205;K14736;K03872;K04371;K03873;K05132;K08268;K04692;K04357;K16366;K13241;K01103;K05121;K07203;K05466;K02677;K04735;K03870;K10160;…	211	TRINITY_DN70_c1_g1;TRINITY_DN8_c0_g1;TRINITY_DN164_c1_g1;TRINITY_DN152_c0_g2;TRINITY_DN165_c1_g2;TRINITY_DN201_c0_g1;TRINITY_DN236_c0_g1;TRINITY_DN356_c0_g1;TRINITY_DN466_c2_g1;TRINITY_DN543_c0_g2;TRINITY_DN552_c0_g1;TRINITY_DN871_c1_g2;TRINITY_DN871_c1_g1;TRINITY_DN944_c0_g1;TRINITY_DN944_c0_g2;TRINITY_DN906_c2_g1;TRINITY_DN1108_c0_g1;TRINITY_DN1216_c0_g1;TRINITY_DN1216_c0_g2;TRINITY_DN1543_c0_g…
Oxidative phosphorylation	Energy metabolism	Metabolism	103	K03943;K03937;K02257;K03951;K02270;K01544;K03964;K03942;K02149;K02154;K03958;K00414;K03934;K00235;K03946;K03661;K03962;K02273;K02147;K03935;K03955;K02271;K02148;K00420;K02127;K02144;K00413;K03662;K02145;K03959;K02263;K03948;K02132;K02138;K03950;K02150;K00418;K03949;K03939;K03936;K00416;K02128;K03967;K02133;K03953;K03941;K03945;K01507;K02260;K00415;K02146;K03961;K00237;K03965;K02135;K03947;K03938;…	210	TRINITY_DN3_c9_g2;TRINITY_DN112_c3_g1;TRINITY_DN184_c1_g2;TRINITY_DN199_c0_g1;TRINITY_DN297_c2_g1;TRINITY_DN271_c0_g2;TRINITY_DN444_c1_g1;TRINITY_DN468_c0_g1;TRINITY_DN784_c0_g1;TRINITY_DN775_c0_g1;TRINITY_DN775_c0_g2;TRINITY_DN775_c0_g3;TRINITY_DN864_c1_g1;TRINITY_DN894_c2_g1;TRINITY_DN819_c1_g2;TRINITY_DN819_c1_g1;TRINITY_DN988_c0_g1;TRINITY_DN946_c2_g3;TRINITY_DN1043_c0_g1;TRINITY_DN1006_c0_g2…
Choline metabolism in cancer	Cancers: Overview	Human Diseases	59	K00922;K00889;K00901;K02833;K07861;K14156;K04688;K05748;K04366;K03099;K06276;K15377;K07207;K04456;K08202;K00994;K04368;K04369;K01115;K04392;K05089;K04440;K07206;K00968;K04363;K18695;K05747;K16342;K07827;K04359;K02649;K01116;K01080;K04684;K08732;K07208;K05450;K07205;K04371;K08268;K04357;K06515;K15282;K06128;K04364;K05753;K07860;K08200;K07203;K02677;K14387;K19663;K17386;K04361;K06083;K08198;K04379;…	210	TRINITY_DN152_c0_g2;TRINITY_DN176_c2_g2;TRINITY_DN217_c1_g1;TRINITY_DN203_c0_g3;TRINITY_DN331_c0_g1;TRINITY_DN367_c0_g1;TRINITY_DN438_c3_g1;TRINITY_DN492_c1_g2;TRINITY_DN552_c0_g1;TRINITY_DN665_c4_g1;TRINITY_DN619_c0_g1;TRINITY_DN632_c0_g1;TRINITY_DN779_c2_g1;TRINITY_DN828_c5_g1;TRINITY_DN802_c0_g1;TRINITY_DN944_c0_g1;TRINITY_DN944_c0_g2;TRINITY_DN959_c0_g1;TRINITY_DN906_c2_g1;TRINITY_DN1002_c0_g…
RNA degradation	Folding, sorting and degradation	Genetic Information Processing	58	K00850;K14443;K12599;K18681;K12580;K12604;K12597;K12603;K12617;K03678;K13126;K12626;K12606;K04043;K12616;K12619;K03514;K12586;K12623;K12572;K12591;K01689;K12620;K04077;K12581;K16855;K12622;K12605;K12571;K14442;K12613;K12600;K12598;K11600;K03681;K01148;K12602;K12593;K00962;K12589;K03679;K12585;K10643;K12621;K12625;K07573;K12615;K12592;K12607;K12610;K12624;K12627;K12584;K12590;K12618;K08311;K03732;…	210	TRINITY_DN20_c0_g1;TRINITY_DN20_c0_g2;TRINITY_DN20_c0_g3;TRINITY_DN111_c12_g1;TRINITY_DN140_c1_g1;TRINITY_DN176_c4_g1;TRINITY_DN114_c1_g1;TRINITY_DN254_c1_g1;TRINITY_DN297_c3_g1;TRINITY_DN293_c0_g1;TRINITY_DN395_c0_g1;TRINITY_DN301_c1_g1;TRINITY_DN426_c2_g1;TRINITY_DN481_c1_g2;TRINITY_DN440_c0_g1;TRINITY_DN561_c3_g2;TRINITY_DN520_c2_g1;TRINITY_DN637_c0_g1;TRINITY_DN768_c1_g1;TRINITY_DN758_c0_g1;T…
Parkinson disease	Neurodegenerative diseases	Human Diseases	99	K03943;K03937;K03951;K03178;K10698;K02270;K10575;K03964;K03942;K04630;K03958;K00414;K03934;K00235;K03946;K04557;K08045;K03962;K02273;K02187;K15041;K03935;K03955;K02271;K00420;K15040;K08738;K10578;K02127;K00413;K03959;K05688;K02263;K03948;K04553;K02132;K02138;K03950;K00418;K03949;K02084;K03939;K04554;K03936;K04633;K09565;K00416;K02128;K03967;K02133;K03953;K05863;K03941;K03945;K04556;K00415;K03961;…	208	TRINITY_DN3_c9_g2;TRINITY_DN112_c3_g1;TRINITY_DN199_c0_g1;TRINITY_DN145_c0_g1;TRINITY_DN145_c1_g1;TRINITY_DN297_c2_g1;TRINITY_DN338_c3_g1;TRINITY_DN444_c1_g1;TRINITY_DN468_c0_g1;TRINITY_DN653_c0_g2;TRINITY_DN864_c1_g1;TRINITY_DN894_c2_g1;TRINITY_DN819_c1_g2;TRINITY_DN819_c1_g1;TRINITY_DN988_c0_g1;TRINITY_DN946_c2_g3;TRINITY_DN918_c1_g1;TRINITY_DN1003_c1_g1;TRINITY_DN1006_c0_g2;TRINITY_DN1099_c2_g…
Translation factors	Protein families: genetic information processing	Brite Hierarchies	72	K03254;K03241;K06158;K03243;K03231;K03253;K17868;K03680;K02519;K03237;K03257;K17866;K02355;K03113;K03262;K02493;K15031;K03265;K19539;K04794;K00586;K03246;K15032;K06184;K03259;K03249;K03239;K03260;K03250;K03233;K15029;K03267;K03264;K15027;K03245;K02835;K03242;K03258;K03754;K19589;K18995;K07561;K03238;K03248;K15026;K03236;K15410;K15028;K03263;K06927;K03255;K15033;K03247;K02520;K02838;K15030;K03252;…	207	TRINITY_DN93_c1_g1;TRINITY_DN31_c1_g1;TRINITY_DN186_c0_g1;TRINITY_DN186_c1_g1;TRINITY_DN258_c2_g1;TRINITY_DN251_c1_g3;TRINITY_DN355_c0_g1;TRINITY_DN505_c0_g1;TRINITY_DN569_c0_g1;TRINITY_DN628_c0_g1;TRINITY_DN784_c0_g2;TRINITY_DN722_c0_g1;TRINITY_DN922_c0_g1;TRINITY_DN951_c0_g1;TRINITY_DN928_c0_g1;TRINITY_DN928_c0_g2;TRINITY_DN1015_c1_g1;TRINITY_DN1007_c0_g1;TRINITY_DN1153_c2_g1;TRINITY_DN1253_c1_…
Glutamatergic synapse	Nervous system	Organismal Systems	72	K04634;K04542;K04960;K15009;K05199;K04630;K15010;K08046;K08045;K01115;K04348;K08044;K00910;K04536;K05614;K13576;K05214;K04959;K16342;K01425;K05212;K05211;K04344;K05204;K05198;K05612;K04549;K14207;K04534;K05858;K04851;K04958;K04538;K05618;K04371;K15008;K06268;K05197;K07826;K11828;K08042;K04345;K04539;K04545;K02677;K05202;K04608;K04850;K04964;K05200;K05205;K19663;K08041;K04632;K07825;K04537;K08043;…	205	TRINITY_DN22_c0_g3;TRINITY_DN43_c0_g2;TRINITY_DN296_c3_g1;TRINITY_DN231_c0_g1;TRINITY_DN485_c1_g1;TRINITY_DN501_c3_g1;TRINITY_DN558_c5_g1;TRINITY_DN653_c0_g2;TRINITY_DN847_c3_g1;TRINITY_DN956_c1_g1;TRINITY_DN1003_c1_g1;TRINITY_DN1267_c0_g1;TRINITY_DN1267_c1_g3;TRINITY_DN1267_c1_g5;TRINITY_DN1267_c1_g4;TRINITY_DN1311_c0_g1;TRINITY_DN1481_c0_g1;TRINITY_DN1467_c3_g1;TRINITY_DN1467_c2_g1;TRINITY_DN15…
Relaxin signaling pathway	Endocrine system	Organismal Systems	79	K04637;K04542;K06279;K17447;K00922;K02833;K04441;K06236;K04366;K03099;K04630;K06237;K04456;K08046;K08045;K01398;K04431;K04500;K07994;K04368;K04369;K09048;K08044;K05449;K04440;K04439;K04674;K05448;K04536;K04734;K02580;K12313;K07827;K02649;K04306;K04549;K13375;K04534;K05858;K04538;K05704;K04388;K04371;K16366;K18952;K07826;K08042;K13241;K19720;K04364;K05870;K04345;K04539;K04450;K04545;K02677;K04735;…	203	TRINITY_DN22_c0_g2;TRINITY_DN43_c0_g2;TRINITY_DN25_c0_g1;TRINITY_DN25_c0_g2;TRINITY_DN152_c0_g2;TRINITY_DN203_c0_g3;TRINITY_DN538_c1_g1;TRINITY_DN578_c0_g1;TRINITY_DN619_c0_g1;TRINITY_DN632_c0_g1;TRINITY_DN653_c0_g2;TRINITY_DN921_c0_g2;TRINITY_DN944_c0_g1;TRINITY_DN944_c0_g2;TRINITY_DN906_c2_g1;TRINITY_DN956_c1_g1;TRINITY_DN1003_c1_g1;TRINITY_DN1084_c1_g1;TRINITY_DN1149_c1_g1;TRINITY_DN1102_c0_g2…
Parathyroid hormone synthesis, secretion and action	Endocrine system	Organismal Systems	73	K04362;K04346;K04635;K04634;K17895;K04960;K04639;K13365;K12331;K06625;K04366;K04630;K12330;K08046;K08045;K07994;K03626;K04368;K01115;K09048;K08044;K04439;K04959;K13293;K09036;K02161;K16529;K09203;K04684;K09262;K04454;K09278;K04365;K05858;K04958;K03068;K04371;K09260;K07763;K04513;K04585;K08042;K08003;K05870;K04345;K04450;K07996;K04974;K02677;K08558;K14683;K04374;K08539;K09047;K19663;K08041;K04632;…	202	TRINITY_DN86_c3_g1;TRINITY_DN86_c3_g3;TRINITY_DN86_c3_g4;TRINITY_DN22_c0_g5;TRINITY_DN22_c0_g1;TRINITY_DN22_c0_g3;TRINITY_DN110_c4_g1;TRINITY_DN296_c3_g1;TRINITY_DN251_c9_g1;TRINITY_DN315_c0_g2;TRINITY_DN416_c0_g1;TRINITY_DN485_c1_g1;TRINITY_DN543_c0_g2;TRINITY_DN619_c0_g1;TRINITY_DN653_c0_g2;TRINITY_DN609_c0_g1;TRINITY_DN956_c1_g1;TRINITY_DN1003_c1_g1;TRINITY_DN1239_c3_g2;TRINITY_DN1279_c0_g1;TR…
Drug metabolism - other enzymes	Xenobiotics biodegradation and metabolism	Metabolism	28	K03927;K01519;K00088;K00569;K01951;K00799;K00876;K00106;K01044;K01520;K01489;K00758;K10808;K00940;K00699;K00760;K13421;K00757;K10807;K01464;K01195;K00622;K00857;K07415;K13800;K00207;K01431;K03782	202	TRINITY_DN59_c0_g1;TRINITY_DN42_c2_g1;TRINITY_DN134_c0_g1;TRINITY_DN110_c11_g1;TRINITY_DN156_c3_g1;TRINITY_DN243_c0_g1;TRINITY_DN287_c4_g1;TRINITY_DN446_c0_g1;TRINITY_DN961_c2_g1;TRINITY_DN1408_c0_g1;TRINITY_DN1459_c4_g1;TRINITY_DN1459_c1_g1;TRINITY_DN1459_c0_g2;TRINITY_DN1450_c1_g1;TRINITY_DN1841_c1_g1;TRINITY_DN1841_c0_g1;TRINITY_DN2020_c0_g1;TRINITY_DN2098_c4_g1;TRINITY_DN2098_c1_g3;TRINITY_DN…
Insulin resistance	Endocrine and metabolic diseases	Human Diseases	67	K07187;K00688;K04527;K08765;K00922;K17902;K09667;K01946;K04688;K09113;K06276;K00693;K19523;K07209;K04456;K07293;K16333;K09048;K04440;K07191;K08535;K08536;K08772;K07197;K04734;K01110;K06068;K18050;K02580;K01596;K02649;K06269;K04696;K00820;K07201;K15719;K16172;K07299;K05696;K05405;K07199;K05695;K01084;K07189;K04692;K07198;K04373;K18952;K08746;K17605;K03158;K05870;K07203;K04735;K08745;K07294;K18052;…	198	TRINITY_DN70_c0_g2;TRINITY_DN69_c2_g2;TRINITY_DN69_c2_g1;TRINITY_DN164_c1_g1;TRINITY_DN123_c0_g1;TRINITY_DN152_c0_g2;TRINITY_DN281_c0_g1;TRINITY_DN277_c0_g1;TRINITY_DN436_c0_g2;TRINITY_DN552_c0_g1;TRINITY_DN601_c4_g1;TRINITY_DN641_c3_g1;TRINITY_DN679_c1_g1;TRINITY_DN779_c2_g1;TRINITY_DN817_c0_g1;TRINITY_DN824_c0_g1;TRINITY_DN842_c0_g1;TRINITY_DN944_c0_g1;TRINITY_DN944_c0_g2;TRINITY_DN906_c2_g1;TR…
Serotonergic synapse	Nervous system	Organismal Systems	66	K04634;K04542;K04960;K02833;K07418;K04366;K04630;K00509;K08045;K02187;K04368;K00458;K00274;K04536;K00461;K04959;K16342;K08014;K07827;K04344;K04849;K04549;K04520;K04365;K04534;K05858;K04851;K04958;K04538;K04371;K00460;K07826;K04943;K04345;K04999;K04539;K04545;K04161;K02677;K07413;K04850;K04964;K04153;K11987;K19663;K04157;K04632;K07825;K04537;K04541;K05181;K04163;K00502;K04853;K04543;K07414;K05002;…	197	TRINITY_DN22_c0_g3;TRINITY_DN43_c0_g2;TRINITY_DN296_c3_g1;TRINITY_DN203_c0_g3;TRINITY_DN485_c1_g1;TRINITY_DN663_c6_g1;TRINITY_DN619_c0_g1;TRINITY_DN636_c1_g2;TRINITY_DN636_c1_g1;TRINITY_DN653_c0_g2;TRINITY_DN734_c0_g1;TRINITY_DN1003_c1_g1;TRINITY_DN1155_c1_g1;TRINITY_DN1215_c4_g1;TRINITY_DN1215_c1_g1;TRINITY_DN1215_c0_g1;TRINITY_DN1216_c0_g1;TRINITY_DN1561_c0_g1;TRINITY_DN1609_c0_g1;TRINITY_DN171…
Phosphatidylinositol signaling system	Signal transduction	Environmental Information Processing	45	K01099;K00888;K01106;K00922;K00889;K04960;K03084;K00923;K00901;K00911;K00920;K01092;K05857;K00981;K18081;K01107;K15759;K13084;K15909;K01110;K04959;K18083;K02649;K07756;K01116;K13024;K01109;K05858;K04958;K00921;K13711;K00999;K00915;K18086;K10572;K18082;K05860;K00914;K02677;K19663;K00913;K05859;K02183;K01108;K19662	195	TRINITY_DN72_c2_g1;TRINITY_DN49_c0_g1;TRINITY_DN128_c2_g2;TRINITY_DN152_c0_g2;TRINITY_DN176_c2_g2;TRINITY_DN296_c3_g1;TRINITY_DN249_c0_g1;TRINITY_DN285_c0_g1;TRINITY_DN288_c6_g1;TRINITY_DN217_c1_g1;TRINITY_DN331_c0_g1;TRINITY_DN333_c1_g1;TRINITY_DN493_c0_g1;TRINITY_DN492_c1_g2;TRINITY_DN582_c0_g4;TRINITY_DN733_c0_g1;TRINITY_DN744_c1_g1;TRINITY_DN821_c1_g1;TRINITY_DN849_c3_g1;TRINITY_DN828_c5_g2;T…
Measles	Infectious diseases: Viral	Human Diseases	84	K05411;K12646;K00922;K04404;K06624;K14753;K03115;K04722;K11224;K14216;K04383;K12648;K03237;K05130;K04456;K04427;K16196;K05410;K07211;K14754;K11221;K02089;K11219;K12968;K02206;K04734;K11218;K02580;K06563;K06626;K03097;K02649;K05070;K05068;K05133;K10152;K10151;K04390;K04451;K16195;K03283;K05405;K11859;K11217;K16194;K05132;K04692;K04503;K02581;K12560;K10144;K04467;K05414;K08860;K05131;K06451;K02091;…	194	TRINITY_DN15_c0_g1;TRINITY_DN45_c0_g1;TRINITY_DN152_c0_g2;TRINITY_DN100_c0_g1;TRINITY_DN201_c0_g1;TRINITY_DN277_c0_g2;TRINITY_DN332_c0_g1;TRINITY_DN477_c0_g3;TRINITY_DN455_c2_g1;TRINITY_DN583_c0_g1;TRINITY_DN579_c0_g1;TRINITY_DN579_c0_g3;TRINITY_DN645_c0_g1;TRINITY_DN645_c0_g2;TRINITY_DN667_c0_g1;TRINITY_DN675_c0_g1;TRINITY_DN784_c0_g2;TRINITY_DN725_c0_g1;TRINITY_DN944_c0_g1;TRINITY_DN944_c0_g2;T…
Osteoclast differentiation	Development	Organismal Systems	83	K00922;K08009;K04404;K06512;K04441;K04383;K01371;K05130;K07209;K04456;K04403;K04427;K04431;K11221;K08091;K04446;K04368;K04348;K04392;K11219;K09253;K04440;K04674;K05090;K04734;K02580;K03173;K06493;K07210;K04469;K08010;K08601;K09455;K02649;K04696;K08011;K06551;K05133;K13375;K13376;K05147;K07364;K08008;K11217;K04694;K09030;K04388;K04371;K05132;K12560;K06268;K04467;K03158;K05131;K07370;K05703;K04364;…	193	TRINITY_DN152_c0_g2;TRINITY_DN189_c1_g1;TRINITY_DN100_c0_g1;TRINITY_DN353_c0_g2;TRINITY_DN538_c1_g1;TRINITY_DN645_c0_g1;TRINITY_DN645_c0_g2;TRINITY_DN714_c1_g1;TRINITY_DN725_c0_g1;TRINITY_DN842_c0_g1;TRINITY_DN944_c0_g1;TRINITY_DN944_c0_g2;TRINITY_DN906_c2_g1;TRINITY_DN1028_c0_g1;TRINITY_DN1077_c0_g1;TRINITY_DN1149_c1_g1;TRINITY_DN1292_c0_g1;TRINITY_DN1283_c1_g1;TRINITY_DN1222_c1_g1;TRINITY_DN121…
Inflammatory mediator regulation of TRP channels	Sensory system	Organismal Systems	58	K04634;K00922;K04960;K04441;K07418;K08046;K08045;K08044;K04440;K00458;K16343;K06068;K18050;K04959;K16342;K04515;K02649;K06269;K01116;K05858;K04958;K04432;K05459;K05704;K08042;K03915;K04971;K04345;K02677;K07413;K18052;K04831;K19663;K03916;K08041;K04157;K04632;K05859;K08043;K04433;K04984;K02183;K04829;K04830;K04386;K04234;K07425;K08049;K03176;K18051;K04983;K04149;K04832;K02582;K04259;K08048;K04973;…	192	TRINITY_DN22_c0_g3;TRINITY_DN152_c0_g2;TRINITY_DN296_c3_g1;TRINITY_DN485_c1_g1;TRINITY_DN538_c1_g1;TRINITY_DN663_c6_g1;TRINITY_DN636_c1_g2;TRINITY_DN636_c1_g1;TRINITY_DN906_c2_g1;TRINITY_DN956_c1_g1;TRINITY_DN1003_c1_g1;TRINITY_DN1215_c4_g1;TRINITY_DN1215_c1_g1;TRINITY_DN1215_c0_g1;TRINITY_DN1481_c0_g1;TRINITY_DN1558_c0_g1;TRINITY_DN1558_c0_g2;TRINITY_DN1550_c0_g1;TRINITY_DN1561_c0_g1;TRINITY_DN1…
Small cell lung cancer	Cancers: Specific types	Human Diseases	67	K00922;K16060;K05637;K06624;K05636;K06485;K10140;K06243;K06240;K06625;K07209;K10500;K06237;K04377;K04456;K09849;K04725;K02187;K02089;K04685;K03511;K02206;K06247;K08528;K04734;K01110;K04402;K02580;K03173;K06481;K07210;K08738;K06626;K04570;K02161;K02649;K04453;K06487;K04451;K05717;K02084;K05725;K03174;K04503;K14021;K06241;K05719;K04467;K02091;K13241;K17454;K04735;K09389;K06476;K05635;K11987;K06620;…	190	TRINITY_DN152_c0_g2;TRINITY_DN111_c2_g1;TRINITY_DN148_c0_g1;TRINITY_DN201_c0_g1;TRINITY_DN221_c0_g1;TRINITY_DN264_c2_g2;TRINITY_DN264_c1_g1;TRINITY_DN346_c1_g1;TRINITY_DN321_c0_g1;TRINITY_DN471_c0_g1;TRINITY_DN543_c0_g2;TRINITY_DN772_c6_g1;TRINITY_DN842_c0_g1;TRINITY_DN934_c0_g1;TRINITY_DN921_c0_g2;TRINITY_DN939_c0_g2;TRINITY_DN944_c0_g1;TRINITY_DN944_c0_g2;TRINITY_DN906_c2_g1;TRINITY_DN1016_c2_g…
Amino acid related enzymes	Protein families: metabolism	Brite Hierarchies	46	K01874;K00816;K01889;K01880;K01868;K01876;K01887;K01886;K00654;K14455;K01875;K14454;K00819;K01885;K01892;K01869;K01870;K01866;K01872;K01893;K01873;K00643;K04567;K00814;K01890;K00826;K01883;K01879;K01878;K01894;K00652;K00817;K01867;K07806;K14260;K00840;K01845;K00815;K01881;K00830;K00827;K09251;K00825;K00831;K13524;K04566	190	TRINITY_DN40_c0_g1;TRINITY_DN110_c3_g1;TRINITY_DN309_c0_g1;TRINITY_DN327_c1_g1;TRINITY_DN421_c0_g1;TRINITY_DN421_c0_g2;TRINITY_DN529_c1_g1;TRINITY_DN590_c0_g1;TRINITY_DN517_c1_g1;TRINITY_DN647_c0_g1;TRINITY_DN723_c0_g1;TRINITY_DN723_c0_g3;TRINITY_DN709_c0_g1;TRINITY_DN814_c0_g1;TRINITY_DN931_c3_g1;TRINITY_DN1417_c0_g4;TRINITY_DN1417_c0_g1;TRINITY_DN1570_c2_g2;TRINITY_DN1570_c2_g1;TRINITY_DN1518_c…
Cell adhesion molecules (CAMs)	Signaling molecules and interaction	Environmental Information Processing	76	K06087;K06548;K06485;K06735;K07379;K06787;K06770;K06088;K06592;K06752;K06736;K06539;K05689;K06745;K06781;K06785;K06478;K06751;K06816;K06531;K06487;K07378;K06766;K05695;K05693;K06527;K06756;K06710;K05413;K06483;K05719;K06491;K06744;K06496;K06550;K06464;K07377;K16336;K06708;K06796;K06494;K06449;K06760;K06471;K06470;K06590;K06490;K06523;K07523;K16360;K06547;K06809;K06458;K03160;K05412;K06533;K06757;…	188	TRINITY_DN110_c0_g1;TRINITY_DN219_c3_g1;TRINITY_DN264_c1_g1;TRINITY_DN370_c1_g1;TRINITY_DN365_c0_g1;TRINITY_DN441_c2_g2;TRINITY_DN441_c2_g1;TRINITY_DN403_c0_g2;TRINITY_DN741_c0_g1;TRINITY_DN1348_c1_g1;TRINITY_DN1606_c0_g2;TRINITY_DN1670_c2_g1;TRINITY_DN1775_c0_g2;TRINITY_DN1808_c4_g1;TRINITY_DN1948_c1_g1;TRINITY_DN1901_c2_g2;TRINITY_DN2051_c0_g4;TRINITY_DN2051_c0_g5;TRINITY_DN2051_c0_g1;TRINITY_D…
Adherens junction	Cellular community - eukaryotes	Cellular Processes	57	K04362;K06084;K04527;K05699;K04498;K16848;K05700;K07861;K03115;K05706;K05627;K05748;K04501;K02620;K04491;K05701;K04427;K04500;K06592;K04393;K04392;K04674;K05689;K05747;K06593;K03097;K05702;K06086;K06531;K05694;K05083;K05696;K05697;K05690;K05692;K05704;K04388;K05695;K05693;K04371;K05099;K05707;K06082;K04513;K04237;K05703;K05705;K05753;K07860;K05691;K04361;K05698;K06083;K05087;K04490;K04492;K06085	184	TRINITY_DN86_c3_g1;TRINITY_DN86_c3_g3;TRINITY_DN86_c3_g4;TRINITY_DN48_c0_g1;TRINITY_DN164_c1_g1;TRINITY_DN151_c6_g1;TRINITY_DN165_c1_g2;TRINITY_DN181_c0_g1;TRINITY_DN336_c0_g1;TRINITY_DN367_c0_g1;TRINITY_DN332_c0_g1;TRINITY_DN478_c1_g1;TRINITY_DN576_c0_g2;TRINITY_DN665_c4_g1;TRINITY_DN762_c0_g1;TRINITY_DN712_c9_g1;TRINITY_DN876_c1_g1;TRINITY_DN895_c0_g1;TRINITY_DN901_c8_g1;TRINITY_DN978_c0_g2;TRI…
ABC transporters	Membrane transport	Environmental Information Processing	69	K05678;K05657;K05648;K05644;K05645;K05641;K05655;K05665;K05673;K05681;K05643;K05682;K05674;K05676;K05677;K05661;K05649;K05651;K05642;K05662;K05033;K05658;K05675;K05666;K05031;K05667;K05659;K05680;K05660;K10109;K05669;K11085;K11074;K10540;K05668;K02016;K05685;K10555;K10557;K05683;K11072;K10824;K10003;K10542;K06726;K10441;K05664;K19230;K09999;K11720;K02193;K19228;K10440;K02041;K02010;K09810;K05816;…	184	TRINITY_DN167_c0_g1;TRINITY_DN241_c2_g1;TRINITY_DN322_c1_g1;TRINITY_DN392_c1_g1;TRINITY_DN372_c1_g1;TRINITY_DN372_c2_g1;TRINITY_DN420_c2_g1;TRINITY_DN674_c2_g1;TRINITY_DN872_c0_g1;TRINITY_DN1115_c0_g2;TRINITY_DN1345_c1_g2;TRINITY_DN1487_c1_g1;TRINITY_DN1530_c0_g1;TRINITY_DN1752_c1_g1;TRINITY_DN1884_c0_g1;TRINITY_DN1928_c5_g1;TRINITY_DN2221_c1_g2;TRINITY_DN2202_c3_g2;TRINITY_DN2326_c0_g1;TRINITY_D…
GnRH signaling pathway	Endocrine system	Organismal Systems	55	K04635;K04634;K04960;K02833;K04416;K04441;K04366;K03099;K04421;K08046;K08045;K01398;K04431;K04368;K04369;K04428;K01115;K04393;K08044;K04440;K06068;K04959;K16342;K04420;K07827;K04515;K05871;K09203;K04375;K05858;K04851;K04958;K04432;K05704;K04371;K07763;K08042;K04364;K04345;K02677;K04850;K04374;K08041;K04430;K04632;K08043;K04433;K02183;K04361;K08049;K04853;K08523;K08048;K04857;K19662	184	TRINITY_DN22_c0_g1;TRINITY_DN22_c0_g3;TRINITY_DN296_c3_g1;TRINITY_DN203_c0_g3;TRINITY_DN333_c0_g1;TRINITY_DN485_c1_g1;TRINITY_DN538_c1_g1;TRINITY_DN619_c0_g1;TRINITY_DN632_c0_g1;TRINITY_DN764_c1_g1;TRINITY_DN798_c5_g1;TRINITY_DN956_c1_g1;TRINITY_DN1003_c1_g1;TRINITY_DN1084_c1_g1;TRINITY_DN1149_c1_g1;TRINITY_DN1216_c0_g1;TRINITY_DN1216_c0_g2;TRINITY_DN1200_c0_g1;TRINITY_DN1267_c0_g1;TRINITY_DN1267…
Toxoplasmosis	Infectious diseases: Parasitic	Human Diseases	64	K12473;K16060;K05637;K04404;K13377;K05636;K06485;K06243;K06240;K04441;K04630;K06276;K14139;K07209;K04456;K04403;K04427;K04725;K02187;K11219;K04440;K06752;K06247;K04734;K00461;K02580;K07210;K08738;K04570;K02161;K05133;K13375;K13376;K04534;K02158;K04398;K03283;K04432;K11217;K04694;K04371;K05132;K09565;K04692;K06241;K02581;K05719;K04467;K03158;K13241;K04735;K05635;K10160;K05134;K05400;K16061;K04447;…	182	TRINITY_DN192_c2_g1;TRINITY_DN111_c2_g1;TRINITY_DN148_c0_g1;TRINITY_DN100_c0_g1;TRINITY_DN156_c1_g2;TRINITY_DN221_c0_g1;TRINITY_DN264_c2_g2;TRINITY_DN264_c1_g1;TRINITY_DN321_c0_g1;TRINITY_DN471_c0_g1;TRINITY_DN538_c1_g1;TRINITY_DN653_c0_g2;TRINITY_DN779_c2_g1;TRINITY_DN772_c6_g1;TRINITY_DN787_c0_g2;TRINITY_DN787_c0_g3;TRINITY_DN842_c0_g1;TRINITY_DN944_c0_g1;TRINITY_DN944_c0_g2;TRINITY_DN1028_c0_g…
Glucagon signaling pathway	Endocrine system	Organismal Systems	51	K00162;K04634;K00688;K08765;K04498;K17491;K04960;K19008;K01946;K00871;K00693;K19523;K16311;K04456;K07190;K16333;K04348;K09048;K19524;K00016;K15423;K00161;K04959;K01596;K11434;K04515;K01834;K00873;K07201;K07299;K05858;K04958;K13296;K07199;K01084;K07198;K06268;K08042;K11262;K05870;K04345;K04450;K04374;K07294;K04583;K09047;K07202;K04632;K02183;K07200;K19028	182	TRINITY_DN8_c0_g1;TRINITY_DN22_c0_g3;TRINITY_DN69_c2_g2;TRINITY_DN69_c2_g1;TRINITY_DN123_c0_g1;TRINITY_DN165_c1_g2;TRINITY_DN188_c7_g1;TRINITY_DN296_c3_g1;TRINITY_DN348_c0_g2;TRINITY_DN436_c0_g2;TRINITY_DN485_c1_g1;TRINITY_DN528_c7_g1;TRINITY_DN601_c4_g1;TRINITY_DN613_c9_g1;TRINITY_DN641_c3_g1;TRINITY_DN817_c0_g1;TRINITY_DN824_c0_g1;TRINITY_DN935_c11_g1;TRINITY_DN935_c0_g1;TRINITY_DN999_c0_g1;TRI…
Glycerophospholipid metabolism	Lipid metabolism	Metabolism	56	K01613;K00894;K13523;K14676;K15728;K00901;K00967;K14156;K13509;K13512;K00981;K00551;K00649;K00994;K01115;K14286;K01049;K00968;K18695;K16343;K13506;K00995;K13644;K16342;K13510;K08730;K01080;K00993;K16817;K00629;K00111;K00006;K00999;K01517;K08744;K06128;K13515;K14621;K01047;K19007;K13517;K00057;K06129;K00112;K01521;K08729;K06130;K00631;K03621;K16860;K06131;K05939;K03736;K13513;K13516;K06124	181	TRINITY_DN79_c0_g1;TRINITY_DN69_c0_g1;TRINITY_DN147_c1_g1;TRINITY_DN182_c0_g1;TRINITY_DN197_c1_g1;TRINITY_DN217_c1_g1;TRINITY_DN278_c0_g1;TRINITY_DN438_c3_g1;TRINITY_DN414_c0_g3;TRINITY_DN747_c0_g1;TRINITY_DN821_c1_g1;TRINITY_DN837_c3_g2;TRINITY_DN959_c0_g1;TRINITY_DN1046_c0_g1;TRINITY_DN1124_c6_g1;TRINITY_DN1174_c1_g1;TRINITY_DN1267_c0_g1;TRINITY_DN1267_c1_g3;TRINITY_DN1267_c1_g5;TRINITY_DN1267_…
AGE-RAGE signaling pathway in diabetic complications	Endocrine and metabolic diseases	Human Diseases	63	K00922;K13377;K06624;K02833;K11224;K04441;K06236;K04383;K04501;K05857;K06237;K04456;K01398;K04500;K02187;K02089;K04446;K04393;K04392;K05449;K04440;K04674;K03982;K05448;K06068;K18050;K02580;K07827;K14624;K02161;K02649;K03901;K09203;K01116;K07201;K13375;K05717;K13376;K05858;K05405;K08008;K05740;K04388;K04371;K06527;K04692;K04503;K16366;K18952;K19720;K05860;K02677;K04735;K11223;K04447;K06494;K06490;…	180	TRINITY_DN152_c0_g2;TRINITY_DN156_c1_g2;TRINITY_DN201_c0_g1;TRINITY_DN203_c0_g3;TRINITY_DN583_c0_g1;TRINITY_DN538_c1_g1;TRINITY_DN578_c0_g1;TRINITY_DN645_c0_g1;TRINITY_DN645_c0_g2;TRINITY_DN762_c0_g1;TRINITY_DN733_c0_g1;TRINITY_DN921_c0_g2;TRINITY_DN944_c0_g1;TRINITY_DN944_c0_g2;TRINITY_DN906_c2_g1;TRINITY_DN1084_c1_g1;TRINITY_DN1102_c0_g2;TRINITY_DN1102_c1_g3;TRINITY_DN1102_c1_g2;TRINITY_DN1102_…
Cytokines and growth factors	Protein families: signaling and cellular processes	Brite Hierarchies	115	K05504;K04358;K13377;K13769;K04662;K05496;K04383;K05482;K05454;K05502;K05492;K05449;K05510;K05462;K05408;K18497;K05448;K05419;K04359;K14624;K05433;K05456;K10035;K05476;K06854;K05455;K05420;K05514;K13375;K13376;K05450;K05497;K05459;K05505;K05405;K05475;K04664;K05423;K05509;K04357;K05506;K10029;K05460;K03157;K05508;K05414;K04667;K05483;K12671;K05442;K05418;K16595;K16596;K05479;K05498;K05421;K10033;…	180	TRINITY_DN98_c1_g5;TRINITY_DN153_c1_g1;TRINITY_DN156_c1_g2;TRINITY_DN314_c1_g1;TRINITY_DN512_c0_g2;TRINITY_DN594_c2_g1;TRINITY_DN645_c0_g1;TRINITY_DN645_c0_g2;TRINITY_DN770_c0_g1;TRINITY_DN1019_c0_g1;TRINITY_DN1030_c0_g1;TRINITY_DN1285_c3_g1;TRINITY_DN1348_c0_g1;TRINITY_DN1418_c3_g1;TRINITY_DN1569_c1_g2;TRINITY_DN1541_c0_g1;TRINITY_DN1647_c2_g1;TRINITY_DN1632_c1_g1;TRINITY_DN1687_c0_g1;TRINITY_DN…
Lysine degradation	Amino acid metabolism	Metabolism	48	K15588;K09189;K00128;K13645;K11703;K09186;K13646;K11420;K11425;K14959;K09187;K11432;K11422;K18202;K11428;K07515;K11424;K17451;K06101;K00473;K00658;K11431;K00022;K11427;K00626;K00306;K07514;K11419;K09188;K00164;K19199;K00474;K14157;K11423;K18494;K14085;K07511;K11429;K11433;K00149;K11430;K11421;K00471;K01782;K18201;K18826;K00825;K01825	180	TRINITY_DN52_c0_g2;TRINITY_DN93_c0_g1;TRINITY_DN47_c0_g1;TRINITY_DN86_c9_g2;TRINITY_DN29_c3_g1;TRINITY_DN13_c2_g2;TRINITY_DN13_c2_g1;TRINITY_DN99_c0_g4;TRINITY_DN289_c0_g1;TRINITY_DN289_c0_g3;TRINITY_DN312_c2_g1;TRINITY_DN341_c0_g1;TRINITY_DN481_c3_g1;TRINITY_DN463_c0_g1;TRINITY_DN561_c0_g1;TRINITY_DN508_c1_g2;TRINITY_DN508_c1_g1;TRINITY_DN624_c1_g1;TRINITY_DN859_c0_g2;TRINITY_DN985_c2_g1;TRINITY…
Fc gamma R-mediated phagocytosis	Immune system	Organismal Systems	55	K05758;K00922;K00889;K03084;K07941;K05757;K04718;K05754;K04688;K05854;K05748;K04366;K04456;K07362;K08091;K04368;K01115;K04393;K04392;K15909;K12488;K06068;K18050;K12559;K05747;K04409;K05730;K02649;K06478;K01116;K01080;K08011;K12562;K05744;K06274;K05765;K04438;K05756;K05743;K04371;K12560;K05768;K13536;K05753;K07860;K12367;K02677;K19663;K08893;K05855;K05859;K06083;K06498;K05755;K19662	179	TRINITY_DN56_c2_g2;TRINITY_DN152_c0_g2;TRINITY_DN176_c2_g2;TRINITY_DN249_c0_g1;TRINITY_DN284_c0_g1;TRINITY_DN331_c0_g1;TRINITY_DN316_c0_g1;TRINITY_DN362_c0_g1;TRINITY_DN492_c1_g2;TRINITY_DN428_c4_g3;TRINITY_DN552_c0_g1;TRINITY_DN572_c1_g1;TRINITY_DN686_c0_g1;TRINITY_DN665_c4_g1;TRINITY_DN619_c0_g1;TRINITY_DN944_c0_g1;TRINITY_DN944_c0_g2;TRINITY_DN906_c2_g1;TRINITY_DN1202_c0_g1;TRINITY_DN1283_c1_g…
Endocrine resistance	Drug resistance: Antineoplastic	Human Diseases	68	K06279;K17447;K00922;K15144;K06624;K02833;K04441;K06625;K04688;K04366;K03099;K04456;K05931;K08046;K08045;K01398;K02089;K04368;K04369;K02599;K08044;K06622;K04440;K07827;K02161;K06052;K02649;K04684;K05083;K04365;K04451;K02158;K06621;K05725;K05459;K08551;K05704;K11256;K04371;K06051;K04503;K18452;K08042;K04364;K17454;K04345;K04650;K07203;K09389;K06620;K08041;K17449;K08550;K06618;K04632;K17448;K02159;…	179	TRINITY_DN25_c0_g1;TRINITY_DN25_c0_g2;TRINITY_DN152_c0_g2;TRINITY_DN178_c1_g1;TRINITY_DN201_c0_g1;TRINITY_DN203_c0_g3;TRINITY_DN538_c1_g1;TRINITY_DN543_c0_g2;TRINITY_DN552_c0_g1;TRINITY_DN619_c0_g1;TRINITY_DN632_c0_g1;TRINITY_DN944_c0_g1;TRINITY_DN944_c0_g2;TRINITY_DN903_c0_g1;TRINITY_DN906_c2_g1;TRINITY_DN956_c1_g1;TRINITY_DN1003_c1_g1;TRINITY_DN1084_c1_g1;TRINITY_DN1268_c0_g1;TRINITY_DN1216_c0_…
C-type lectin receptor signaling pathway	Immune system	Organismal Systems	64	K00922;K04960;K02833;K04441;K14958;K14957;K04366;K07209;K04456;K07293;K07211;K11221;K04446;K04348;K05492;K09253;K04440;K09258;K04734;K08862;K06068;K02580;K04959;K07210;K04469;K06563;K17334;K04409;K07827;K08601;K02649;K07368;K12497;K12799;K04958;K04398;K05405;K07532;K05704;K09444;K04371;K07829;K12800;K06268;K07830;K04513;K04467;K12794;K01370;K04735;K07369;K11987;K07831;K05855;K05859;K02183;K05443;…	178	TRINITY_DN152_c0_g2;TRINITY_DN296_c3_g1;TRINITY_DN203_c0_g3;TRINITY_DN538_c1_g1;TRINITY_DN584_c0_g1;TRINITY_DN651_c0_g1;TRINITY_DN619_c0_g1;TRINITY_DN842_c0_g1;TRINITY_DN944_c0_g1;TRINITY_DN944_c0_g2;TRINITY_DN906_c2_g1;TRINITY_DN1197_c0_g1;TRINITY_DN1120_c0_g1;TRINITY_DN1120_c0_g2;TRINITY_DN1292_c0_g1;TRINITY_DN1222_c1_g1;TRINITY_DN1311_c0_g1;TRINITY_DN1348_c0_g1;TRINITY_DN1426_c0_g1;TRINITY_DN1…
Aldosterone synthesis and secretion	Endocrine system	Organismal Systems	57	K12323;K04635;K04634;K12473;K04960;K01539;K05850;K04855;K04914;K01540;K08046;K08045;K13885;K04854;K00513;K16931;K09048;K08044;K18283;K04465;K18050;K04959;K13806;K04515;K09053;K05858;K04851;K04958;K06070;K08794;K07188;K08042;K05870;K04345;K04999;K04450;K02677;K08558;K04850;K16056;K04374;K00070;K09047;K19663;K08041;K00498;K04632;K08043;K02183;K08049;K04853;K04856;K04166;K08048;K04919;K04857;K19662	175	TRINITY_DN60_c3_g1;TRINITY_DN22_c0_g1;TRINITY_DN22_c0_g3;TRINITY_DN192_c2_g1;TRINITY_DN296_c3_g1;TRINITY_DN271_c0_g1;TRINITY_DN271_c0_g3;TRINITY_DN378_c0_g1;TRINITY_DN485_c1_g1;TRINITY_DN455_c0_g1;TRINITY_DN739_c0_g5;TRINITY_DN914_c1_g1;TRINITY_DN956_c1_g1;TRINITY_DN1003_c1_g1;TRINITY_DN1093_c2_g1;TRINITY_DN1156_c3_g1;TRINITY_DN1131_c0_g1;TRINITY_DN1345_c2_g1;TRINITY_DN1322_c0_g1;TRINITY_DN1322_c…
Salmonella infection	Infectious diseases: Bacterial	Human Diseases	51	K05758;K10168;K05757;K05754;K12805;K04441;K04383;K06071;K05748;K05482;K13883;K05701;K10407;K04393;K17388;K04392;K04437;K04440;K05408;K10414;K02580;K05747;K10416;K10413;K04514;K05133;K12799;K05759;K10415;K05505;K05405;K05756;K05692;K04371;K05132;K13241;K15348;K01370;K05753;K05399;K12964;K04735;K10160;K13771;K12266;K12264;K03385;K04379;K05427;K04391;K05755	175	TRINITY_DN56_c2_g2;TRINITY_DN118_c1_g1;TRINITY_DN316_c0_g1;TRINITY_DN428_c4_g3;TRINITY_DN538_c1_g2;TRINITY_DN538_c1_g1;TRINITY_DN645_c0_g1;TRINITY_DN645_c0_g2;TRINITY_DN626_c0_g1;TRINITY_DN665_c4_g1;TRINITY_DN770_c0_g1;TRINITY_DN704_c0_g1;TRINITY_DN978_c0_g2;TRINITY_DN1170_c1_g1;TRINITY_DN1380_c1_g2;TRINITY_DN1380_c1_g1;TRINITY_DN1342_c1_g1;TRINITY_DN1451_c0_g1;TRINITY_DN1451_c0_g2;TRINITY_DN1402…
Amoebiasis	Infectious diseases: Parasitic	Human Diseases	55	K04635;K04637;K04634;K00922;K05699;K05637;K07887;K13377;K05636;K05700;K06243;K06240;K06236;K01476;K06237;K02187;K06247;K13963;K02580;K02649;K07889;K13375;K05717;K13376;K05858;K05725;K04455;K05405;K04633;K04387;K06241;K13241;K19720;K04345;K02677;K06464;K04735;K05635;K10160;K03997;K19663;K06244;K08041;K07888;K04636;K04632;K05443;K04386;K05406;K01319;K05427;K04000;K03998;K04391;K19662	175	TRINITY_DN22_c0_g1;TRINITY_DN22_c0_g2;TRINITY_DN22_c0_g3;TRINITY_DN152_c0_g2;TRINITY_DN151_c6_g1;TRINITY_DN148_c0_g1;TRINITY_DN124_c0_g1;TRINITY_DN156_c1_g2;TRINITY_DN221_c0_g1;TRINITY_DN336_c0_g1;TRINITY_DN321_c0_g1;TRINITY_DN471_c0_g1;TRINITY_DN485_c1_g1;TRINITY_DN578_c0_g1;TRINITY_DN772_c6_g1;TRINITY_DN712_c9_g1;TRINITY_DN901_c1_g1;TRINITY_DN901_c8_g1;TRINITY_DN921_c0_g2;TRINITY_DN906_c2_g1;TR…
MAPK signaling pathway - fly	Signal transduction	Environmental Information Processing	50	K10176;K06279;K04404;K04461;K04382;K16197;K04417;K04662;K04441;K04352;K03099;K06689;K04426;K04427;K04431;K07293;K14290;K04368;K04428;K04506;K04392;K04440;K08840;K02678;K12380;K04508;K07827;K08601;K04564;K17608;K05759;K04365;K04432;K07364;K05704;K04371;K13411;K08892;K09260;K03211;K04364;K04450;K13578;K04430;K05088;K03175;K04361;K08545;K17536;K18529	174	TRINITY_DN42_c0_g2;TRINITY_DN25_c0_g1;TRINITY_DN100_c0_g1;TRINITY_DN242_c2_g1;TRINITY_DN387_c2_g1;TRINITY_DN306_c1_g1;TRINITY_DN438_c1_g1;TRINITY_DN512_c0_g2;TRINITY_DN538_c1_g1;TRINITY_DN521_c0_g1;TRINITY_DN632_c0_g1;TRINITY_DN660_c6_g2;TRINITY_DN660_c6_g1;TRINITY_DN611_c4_g1;TRINITY_DN764_c0_g1;TRINITY_DN901_c3_g3;TRINITY_DN901_c3_g2;TRINITY_DN1077_c0_g1;TRINITY_DN1149_c1_g1;TRINITY_DN1197_c0_g…
Progesterone-mediated oocyte maturation	Endocrine system	Organismal Systems	53	K06645;K00922;K03351;K03353;K04441;K03352;K04366;K04630;K03348;K04456;K08046;K08045;K04368;K08044;K04440;K11481;K02206;K04079;K07827;K08556;K02649;K03364;K03349;K06633;K02602;K06631;K04365;K05459;K03354;K13296;K03355;K04371;K04373;K08042;K13728;K08694;K04345;K03350;K10403;K05868;K05867;K08041;K02537;K08043;K02178;K03358;K02087;K08049;K05087;K08837;K06638;K06627;K08048	173	TRINITY_DN0_c28_g2;TRINITY_DN152_c0_g2;TRINITY_DN367_c3_g1;TRINITY_DN434_c1_g1;TRINITY_DN538_c1_g1;TRINITY_DN684_c0_g1;TRINITY_DN619_c0_g1;TRINITY_DN653_c0_g2;TRINITY_DN788_c1_g3;TRINITY_DN788_c1_g1;TRINITY_DN944_c0_g1;TRINITY_DN944_c0_g2;TRINITY_DN906_c2_g1;TRINITY_DN956_c1_g1;TRINITY_DN1003_c1_g1;TRINITY_DN1216_c0_g1;TRINITY_DN1287_c3_g1;TRINITY_DN1481_c0_g1;TRINITY_DN1558_c0_g1;TRINITY_DN1558_…
EGFR tyrosine kinase inhibitor resistance	Drug resistance: Antineoplastic	Human Diseases	62	K05094;K06279;K17447;K00922;K02833;K04688;K04366;K03099;K04456;K04368;K04369;K08774;K05089;K04363;K18497;K05093;K05448;K01110;K03259;K05055;K07827;K04570;K04359;K02161;K02649;K05456;K01116;K09408;K05455;K09593;K05083;K08052;K04365;K05450;K02158;K05459;K05405;K07205;K11217;K05704;K04371;K04692;K04357;K05460;K05099;K05084;K04364;K07203;K02677;K04447;K19663;K02991;K17449;K17448;K05098;K02159;K05859;…	173	TRINITY_DN86_c3_g2;TRINITY_DN25_c0_g1;TRINITY_DN25_c0_g2;TRINITY_DN152_c0_g2;TRINITY_DN203_c0_g3;TRINITY_DN552_c0_g1;TRINITY_DN619_c0_g1;TRINITY_DN632_c0_g1;TRINITY_DN944_c0_g1;TRINITY_DN944_c0_g2;TRINITY_DN906_c2_g1;TRINITY_DN1216_c0_g1;TRINITY_DN1216_c0_g2;TRINITY_DN1204_c6_g1;TRINITY_DN1590_c0_g3;TRINITY_DN1541_c0_g2;TRINITY_DN1541_c0_g3;TRINITY_DN1632_c1_g1;TRINITY_DN1625_c7_g1;TRINITY_DN1687…
ECM-receptor interaction	Signaling molecules and interaction	Environmental Information Processing	49	K06583;K05637;K05636;K06485;K06588;K06243;K06252;K06240;K06484;K06236;K06238;K06254;K06237;K06255;K16857;K06267;K06247;K06493;K06481;K06265;K03900;K06589;K06261;K06487;K06251;K05717;K06258;K04659;K06586;K06480;K06241;K06483;K05719;K06266;K06525;K06476;K05635;K06244;K06590;K06250;K06259;K06264;K06591;K06249;K06263;K08131;K19719;K06584;K06257	172	TRINITY_DN67_c0_g1;TRINITY_DN148_c0_g1;TRINITY_DN221_c0_g1;TRINITY_DN264_c1_g1;TRINITY_DN316_c2_g3;TRINITY_DN321_c0_g1;TRINITY_DN324_c0_g1;TRINITY_DN471_c0_g1;TRINITY_DN459_c0_g1;TRINITY_DN578_c0_g1;TRINITY_DN772_c6_g1;TRINITY_DN821_c0_g1;TRINITY_DN957_c0_g1;TRINITY_DN921_c0_g2;TRINITY_DN1045_c0_g1;TRINITY_DN1044_c0_g1;TRINITY_DN1016_c2_g1;TRINITY_DN1396_c2_g1;TRINITY_DN1422_c4_g1;TRINITY_DN1420_…
Alcoholism	Substance dependence	Human Diseases	66	K04542;K06279;K17447;K11253;K02833;K11404;K06067;K04366;K11251;K03099;K04630;K18671;K11408;K11407;K08045;K04368;K09048;K00274;K04536;K05214;K07827;K05212;K05211;K11406;K06269;K07359;K04549;K04365;K04534;K04538;K04371;K11303;K07826;K04364;K05870;K04539;K04450;K11252;K04545;K04374;K11418;K09047;K17449;K04632;K17448;K09029;K07825;K04537;K04541;K05213;K02183;K11405;K11409;K15494;K04360;K04543;K04355;…	171	TRINITY_DN43_c0_g2;TRINITY_DN25_c0_g1;TRINITY_DN25_c0_g2;TRINITY_DN297_c1_g1;TRINITY_DN203_c0_g3;TRINITY_DN329_c0_g1;TRINITY_DN307_c2_g1;TRINITY_DN619_c0_g1;TRINITY_DN669_c0_g1;TRINITY_DN632_c0_g1;TRINITY_DN653_c0_g2;TRINITY_DN738_c0_g1;TRINITY_DN899_c0_g1;TRINITY_DN872_c3_g1;TRINITY_DN1003_c1_g1;TRINITY_DN1216_c0_g1;TRINITY_DN1322_c0_g1;TRINITY_DN1322_c0_g2;TRINITY_DN1499_c0_g1;TRINITY_DN1499_c0…
TNF signaling pathway	Signal transduction	Environmental Information Processing	78	K00922;K16060;K04404;K10048;K15637;K16510;K04441;K04426;K07209;K04456;K04403;K04427;K09849;K04431;K02187;K04368;K02373;K09048;K08847;K04440;K09258;K04734;K02580;K03173;K05419;K07210;K14624;K06052;K04724;K05433;K05141;K02649;K04696;K04390;K04445;K04397;K04398;K17065;K04432;K05505;K05405;K11859;K03174;K09444;K04371;K08849;K06527;K16366;K02861;K07763;K04467;K05508;K03158;K12671;K04415;K05870;K05632;…	170	TRINITY_DN152_c0_g2;TRINITY_DN111_c2_g1;TRINITY_DN100_c0_g1;TRINITY_DN265_c0_g1;TRINITY_DN237_c0_g4;TRINITY_DN237_c0_g2;TRINITY_DN261_c0_g1;TRINITY_DN264_c2_g2;TRINITY_DN538_c1_g1;TRINITY_DN611_c4_g1;TRINITY_DN842_c0_g1;TRINITY_DN944_c0_g1;TRINITY_DN944_c0_g2;TRINITY_DN906_c2_g1;TRINITY_DN1028_c0_g1;TRINITY_DN1077_c0_g1;TRINITY_DN1186_c0_g1;TRINITY_DN1149_c1_g1;TRINITY_DN1155_c1_g1;TRINITY_DN1216…
ErbB signaling pathway	Signal transduction	Environmental Information Processing	63	K06279;K17447;K00922;K06624;K02833;K11224;K06625;K04688;K04366;K03099;K04377;K04456;K09784;K04410;K04431;K04368;K04369;K08774;K05733;K04440;K04409;K06619;K07827;K04515;K02649;K05456;K01116;K05455;K04375;K09593;K05083;K04365;K07365;K02158;K09782;K04438;K05725;K07205;K05704;K04707;K04371;K08887;K04357;K05084;K05735;K04364;K07203;K02677;K11223;K19663;K17449;K04430;K17448;K05859;K05458;K03083;K04361;…	169	TRINITY_DN25_c0_g1;TRINITY_DN25_c0_g2;TRINITY_DN152_c0_g2;TRINITY_DN201_c0_g1;TRINITY_DN203_c0_g3;TRINITY_DN583_c0_g1;TRINITY_DN543_c0_g2;TRINITY_DN552_c0_g1;TRINITY_DN619_c0_g1;TRINITY_DN632_c0_g1;TRINITY_DN939_c0_g2;TRINITY_DN944_c0_g1;TRINITY_DN944_c0_g2;TRINITY_DN906_c2_g1;TRINITY_DN1065_c2_g1;TRINITY_DN1118_c1_g1;TRINITY_DN1149_c1_g1;TRINITY_DN1216_c0_g1;TRINITY_DN1216_c0_g2;TRINITY_DN1204_c…
Circadian entrainment	Environmental adaptation	Organismal Systems	64	K04634;K04542;K04960;K04963;K04855;K05199;K04630;K07376;K02633;K08046;K08045;K04854;K08044;K04536;K04515;K05212;K05211;K05198;K04549;K04445;K04534;K05858;K04851;K04958;K04538;K04371;K05197;K07826;K08042;K04587;K04962;K05870;K04345;K04999;K04539;K04961;K04545;K02677;K04850;K05200;K19663;K08041;K04632;K16513;K07825;K04537;K08043;K04541;K07843;K02183;K08049;K04543;K04856;K11265;K12319;K05002;K13240;…	168	TRINITY_DN22_c0_g3;TRINITY_DN43_c0_g2;TRINITY_DN296_c3_g1;TRINITY_DN258_c7_g1;TRINITY_DN485_c1_g1;TRINITY_DN455_c0_g1;TRINITY_DN501_c3_g1;TRINITY_DN653_c0_g2;TRINITY_DN804_c1_g1;TRINITY_DN834_c0_g1;TRINITY_DN956_c1_g1;TRINITY_DN1003_c1_g1;TRINITY_DN1156_c3_g1;TRINITY_DN1158_c1_g1;TRINITY_DN1194_c0_g2;TRINITY_DN1481_c0_g1;TRINITY_DN1714_c1_g3;TRINITY_DN1714_c1_g1;TRINITY_DN1973_c0_g1;TRINITY_DN219…
Natural killer cell mediated cytotoxicity	Immune system	Organismal Systems	68	K06279;K17447;K00922;K02833;K07861;K04722;K04366;K03099;K05130;K04726;K02187;K07293;K07362;K04446;K04368;K04369;K04348;K04392;K04409;K07827;K05730;K02649;K05871;K06751;K01116;K05133;K07984;K01353;K04390;K04365;K07360;K05697;K06742;K04371;K05132;K06268;K07985;K05414;K05131;K06728;K05703;K04364;K06582;K07860;K02677;K06464;K07988;K06453;K19663;K05855;K17449;K06490;K17448;K06479;K05859;K06523;K07986;…	167	TRINITY_DN25_c0_g1;TRINITY_DN25_c0_g2;TRINITY_DN152_c0_g2;TRINITY_DN203_c0_g3;TRINITY_DN367_c0_g1;TRINITY_DN455_c2_g1;TRINITY_DN619_c0_g1;TRINITY_DN632_c0_g1;TRINITY_DN725_c0_g1;TRINITY_DN906_c2_g1;TRINITY_DN1148_c3_g1;TRINITY_DN1155_c1_g1;TRINITY_DN1197_c0_g1;TRINITY_DN1202_c0_g1;TRINITY_DN1222_c1_g1;TRINITY_DN1216_c0_g1;TRINITY_DN1216_c0_g2;TRINITY_DN1311_c0_g1;TRINITY_DN1451_c0_g1;TRINITY_DN14…
T cell receptor signaling pathway	Immune system	Organismal Systems	70	K00922;K02833;K04441;K04366;K03099;K06276;K07209;K04456;K04427;K04410;K04431;K02089;K07362;K04446;K04368;K04369;K04348;K04393;K05733;K04734;K02580;K07210;K04409;K07827;K05730;K02649;K07368;K06478;K01116;K05872;K04350;K07360;K07365;K05697;K07364;K04371;K02581;K06268;K04513;K04467;K05735;K06451;K06744;K04415;K05703;K04364;K12076;K04735;K07369;K18052;K06453;K06470;K06452;K03083;K05443;K06458;K07367;…	164	TRINITY_DN152_c0_g2;TRINITY_DN203_c0_g3;TRINITY_DN538_c1_g1;TRINITY_DN619_c0_g1;TRINITY_DN632_c0_g1;TRINITY_DN779_c2_g1;TRINITY_DN842_c0_g1;TRINITY_DN944_c0_g1;TRINITY_DN944_c0_g2;TRINITY_DN906_c2_g1;TRINITY_DN1077_c0_g1;TRINITY_DN1118_c1_g1;TRINITY_DN1149_c1_g1;TRINITY_DN1268_c0_g1;TRINITY_DN1202_c0_g1;TRINITY_DN1222_c1_g1;TRINITY_DN1216_c0_g1;TRINITY_DN1216_c0_g2;TRINITY_DN1311_c0_g1;TRINITY_DN…
Gap junction	Cellular community - eukaryotes	Cellular Processes	53	K04635;K04634;K04960;K02833;K04289;K04366;K03099;K04630;K07376;K05701;K08046;K08045;K04368;K04369;K08044;K05089;K04363;K04959;K04420;K07827;K04359;K07374;K05450;K05858;K07375;K04958;K05704;K04371;K04357;K08042;K04364;K04345;K04463;K02677;K19663;K08041;K04157;K04632;K17386;K08043;K04361;K04141;K02087;K08049;K08959;K12319;K12318;K19477;K07372;K04603;K08048;K04144;K19662	162	TRINITY_DN22_c0_g1;TRINITY_DN22_c0_g3;TRINITY_DN296_c3_g1;TRINITY_DN203_c0_g3;TRINITY_DN485_c1_g1;TRINITY_DN566_c0_g1;TRINITY_DN619_c0_g1;TRINITY_DN632_c0_g1;TRINITY_DN653_c0_g2;TRINITY_DN804_c1_g1;TRINITY_DN978_c0_g2;TRINITY_DN956_c1_g1;TRINITY_DN1003_c1_g1;TRINITY_DN1216_c0_g1;TRINITY_DN1216_c0_g2;TRINITY_DN1481_c0_g1;TRINITY_DN1590_c0_g3;TRINITY_DN1541_c0_g2;TRINITY_DN1541_c0_g3;TRINITY_DN1973…
Cholinergic synapse	Nervous system	Organismal Systems	68	K04635;K04634;K04542;K00922;K04960;K02833;K04630;K04456;K08046;K08045;K04368;K09048;K08044;K04929;K01049;K04536;K04959;K07827;K04515;K02161;K05007;K02649;K04344;K04849;K04549;K04534;K05858;K04851;K04958;K04538;K04371;K07826;K08042;K05703;K05870;K04345;K04813;K04815;K04539;K04545;K02677;K14387;K04850;K04374;K09047;K04447;K19663;K08041;K04130;K04129;K04132;K04131;K07825;K04537;K08043;K04541;K04926;…	161	TRINITY_DN22_c0_g1;TRINITY_DN22_c0_g3;TRINITY_DN43_c0_g2;TRINITY_DN152_c0_g2;TRINITY_DN296_c3_g1;TRINITY_DN203_c0_g3;TRINITY_DN485_c1_g1;TRINITY_DN653_c0_g2;TRINITY_DN944_c0_g1;TRINITY_DN944_c0_g2;TRINITY_DN906_c2_g1;TRINITY_DN956_c1_g1;TRINITY_DN1003_c1_g1;TRINITY_DN1216_c0_g1;TRINITY_DN1322_c0_g1;TRINITY_DN1322_c0_g2;TRINITY_DN1481_c0_g1;TRINITY_DN1471_c0_g1;TRINITY_DN1590_c0_g2;TRINITY_DN1567_…
Bacterial invasion of epithelial cells	Infectious diseases: Bacterial	Human Diseases	51	K05758;K06279;K17447;K01528;K00922;K13738;K05700;K05757;K06484;K05754;K16942;K05748;K16939;K04393;K04392;K19241;K05760;K05689;K16938;K05747;K02649;K04646;K09593;K05717;K05726;K04438;K05725;K05756;K06106;K05692;K05704;K13737;K04707;K04644;K05099;K04513;K05719;K13728;K05753;K18985;K13736;K12366;K17449;K17448;K05691;K13708;K13735;K04645;K13744;K06278;K05755	160	TRINITY_DN56_c2_g2;TRINITY_DN25_c0_g1;TRINITY_DN25_c0_g2;TRINITY_DN122_c1_g1;TRINITY_DN152_c0_g2;TRINITY_DN108_c2_g1;TRINITY_DN336_c0_g1;TRINITY_DN316_c0_g1;TRINITY_DN447_c0_g1;TRINITY_DN447_c0_g2;TRINITY_DN459_c0_g1;TRINITY_DN428_c4_g3;TRINITY_DN601_c2_g1;TRINITY_DN665_c4_g1;TRINITY_DN725_c1_g1;TRINITY_DN712_c9_g1;TRINITY_DN906_c2_g1;TRINITY_DN1167_c1_g1;TRINITY_DN1380_c1_g2;TRINITY_DN1380_c1_g1…
Platinum drug resistance	Drug resistance: Antineoplastic	Human Diseases	42	K14686;K00922;K16060;K00799;K06625;K08737;K04426;K10849;K06276;K03164;K04456;K04726;K04725;K02187;K02373;K17686;K08738;K04570;K02161;K08734;K02649;K04390;K05083;K04451;K02158;K06621;K04398;K02084;K04371;K04728;K14021;K08735;K08736;K10131;K05666;K10847;K02350;K10132;K03509;K10605;K02159;K06643	158	TRINITY_DN89_c2_g1;TRINITY_DN152_c0_g2;TRINITY_DN111_c2_g1;TRINITY_DN243_c0_g1;TRINITY_DN287_c4_g1;TRINITY_DN264_c2_g2;TRINITY_DN543_c0_g2;TRINITY_DN661_c1_g1;TRINITY_DN611_c4_g1;TRINITY_DN730_c0_g1;TRINITY_DN779_c2_g1;TRINITY_DN798_c0_g1;TRINITY_DN944_c0_g1;TRINITY_DN944_c0_g2;TRINITY_DN906_c2_g1;TRINITY_DN1148_c3_g1;TRINITY_DN1112_c1_g1;TRINITY_DN1155_c1_g1;TRINITY_DN1204_c1_g1;TRINITY_DN1450_c…
Ribosome biogenesis in eukaryotes	Translation	Genetic Information Processing	65	K14545;K14554;K14568;K03115;K14570;K14537;K14538;K14527;K11131;K03685;K06943;K12619;K14548;K14521;K14290;K14556;K14553;K11130;K03538;K14572;K07936;K14563;K03097;K14562;K14575;K14555;K14546;K14558;K14567;K14530;K14565;K03264;K03539;K14561;K14549;K14536;K14571;K07562;K11129;K14557;K14564;K07179;K14544;K14550;K14539;K11108;K14560;K14566;K14573;K18532;K14574;K14569;K11128;K14552;K14525;K13288;K14559;…	157	TRINITY_DN161_c0_g1;TRINITY_DN169_c1_g1;TRINITY_DN317_c0_g1;TRINITY_DN332_c0_g1;TRINITY_DN325_c0_g1;TRINITY_DN674_c0_g3;TRINITY_DN603_c0_g3;TRINITY_DN786_c3_g1;TRINITY_DN768_c12_g1;TRINITY_DN889_c0_g1;TRINITY_DN869_c0_g1;TRINITY_DN944_c1_g1;TRINITY_DN913_c13_g1;TRINITY_DN1054_c1_g1;TRINITY_DN1132_c1_g1;TRINITY_DN1239_c1_g1;TRINITY_DN1521_c0_g1;TRINITY_DN1521_c0_g2;TRINITY_DN1628_c0_g1;TRINITY_DN1…
Lectins	Protein families: signaling and cellular processes	Brite Hierarchies	78	K10068;K08057;K06548;K10089;K10087;K06564;K17525;K10080;K10077;K06702;K06549;K10085;K10093;K17526;K10090;K10071;K10082;K08288;K10088;K06560;K06740;K06563;K10095;K10083;K17521;K10078;K10064;K10102;K06527;K06831;K10100;K06728;K06830;K17523;K06795;K10057;K06496;K06550;K06543;K04985;K06706;K17524;K10086;K10073;K17516;K06832;K06494;K06471;K10084;K06490;K17528;K10076;K06523;K10066;K10103;K03907;K10104;…	155	TRINITY_DN78_c6_g1;TRINITY_DN195_c0_g1;TRINITY_DN219_c3_g1;TRINITY_DN434_c0_g2;TRINITY_DN503_c2_g1;TRINITY_DN582_c0_g2;TRINITY_DN564_c0_g1;TRINITY_DN564_c0_g2;TRINITY_DN593_c0_g1;TRINITY_DN611_c3_g1;TRINITY_DN1178_c2_g1;TRINITY_DN1111_c0_g1;TRINITY_DN1228_c9_g1;TRINITY_DN1267_c2_g1;TRINITY_DN1319_c0_g1;TRINITY_DN1385_c0_g1;TRINITY_DN1386_c0_g2;TRINITY_DN1318_c0_g1;TRINITY_DN1414_c0_g2;TRINITY_DN1…
Th17 cell differentiation	Immune system	Organismal Systems	66	K17895;K11224;K04441;K04501;K07209;K04500;K07362;K05060;K04446;K04348;K05492;K08532;K11219;K04440;K04674;K06752;K04734;K11218;K02580;K11225;K07210;K04079;K05055;K08534;K05070;K01116;K05872;K05068;K05133;K10163;K13375;K07360;K08367;K05405;K11217;K04388;K04371;K05132;K08268;K04692;K05071;K02581;K06268;K04467;K06451;K07203;K04735;K11223;K19598;K18052;K10166;K06453;K04447;K05069;K05063;K08527;K06452;…	155	TRINITY_DN110_c4_g1;TRINITY_DN583_c0_g1;TRINITY_DN538_c1_g1;TRINITY_DN762_c0_g1;TRINITY_DN842_c0_g1;TRINITY_DN1102_c0_g2;TRINITY_DN1102_c1_g3;TRINITY_DN1102_c1_g2;TRINITY_DN1102_c1_g1;TRINITY_DN1202_c0_g1;TRINITY_DN1275_c0_g1;TRINITY_DN1275_c0_g2;TRINITY_DN1275_c0_g3;TRINITY_DN1222_c1_g1;TRINITY_DN1311_c0_g1;TRINITY_DN1348_c0_g1;TRINITY_DN1302_c3_g1;TRINITY_DN1435_c0_g1;TRINITY_DN1467_c1_g1;TRINI…
Central carbon metabolism in cancer	Cancers: Overview	Human Diseases	41	K12077;K00850;K04362;K05094;K00162;K00922;K02833;K04366;K14634;K11416;K04377;K04456;K04368;K04369;K00036;K11413;K05089;K04363;K05093;K01110;K00161;K07827;K01425;K00844;K02649;K01834;K00873;K07299;K08180;K05083;K04451;K04371;K08268;K05099;K05092;K05091;K07203;K13780;K04361;K03176;K05616	153	TRINITY_DN70_c1_g1;TRINITY_DN20_c0_g1;TRINITY_DN20_c0_g2;TRINITY_DN20_c0_g3;TRINITY_DN86_c3_g1;TRINITY_DN86_c3_g3;TRINITY_DN86_c3_g2;TRINITY_DN86_c3_g4;TRINITY_DN8_c0_g1;TRINITY_DN152_c0_g2;TRINITY_DN176_c4_g1;TRINITY_DN297_c3_g1;TRINITY_DN203_c0_g3;TRINITY_DN619_c0_g1;TRINITY_DN653_c3_g1;TRINITY_DN782_c0_g1;TRINITY_DN939_c0_g2;TRINITY_DN944_c0_g1;TRINITY_DN944_c0_g2;TRINITY_DN906_c2_g1;TRINITY_D…
Colorectal cancer	Cancers: Specific types	Human Diseases	63	K00922;K13377;K02833;K10140;K07861;K06625;K04688;K08737;K04366;K03099;K04501;K02620;K04491;K04377;K04456;K09784;K04500;K02187;K04368;K04369;K08774;K04392;K04440;K04674;K03511;K04402;K08738;K07827;K02161;K08734;K02649;K08732;K13375;K04365;K04451;K13376;K02158;K09782;K08733;K04388;K04371;K04357;K04503;K14021;K08735;K04513;K08736;K10131;K04364;K07835;K07860;K10132;K07203;K07834;K02159;K04385;K03083;…	153	TRINITY_DN152_c0_g2;TRINITY_DN156_c1_g2;TRINITY_DN203_c0_g3;TRINITY_DN346_c1_g1;TRINITY_DN367_c0_g1;TRINITY_DN543_c0_g2;TRINITY_DN552_c0_g1;TRINITY_DN661_c1_g1;TRINITY_DN619_c0_g1;TRINITY_DN632_c0_g1;TRINITY_DN762_c0_g1;TRINITY_DN876_c1_g1;TRINITY_DN895_c0_g1;TRINITY_DN939_c0_g2;TRINITY_DN944_c0_g1;TRINITY_DN944_c0_g2;TRINITY_DN906_c2_g1;TRINITY_DN1065_c2_g1;TRINITY_DN1102_c0_g2;TRINITY_DN1102_c1…
Longevity regulating pathway - worm	Aging	Organismal Systems	36	K04527;K00922;K17491;K08269;K16197;K04441;K04688;K12824;K03871;K04043;K04456;K17794;K04440;K01110;K00507;K01358;K04077;K18461;K09408;K10798;K16172;K04564;K13356;K08341;K17705;K08035;K13113;K08268;K03781;K11204;K07203;K14966;K04374;K04433;K05638;K09414	152	TRINITY_DN164_c1_g1;TRINITY_DN152_c0_g2;TRINITY_DN188_c7_g1;TRINITY_DN270_c0_g1;TRINITY_DN306_c1_g1;TRINITY_DN409_c0_g1;TRINITY_DN417_c0_g1;TRINITY_DN538_c1_g1;TRINITY_DN552_c0_g1;TRINITY_DN625_c2_g1;TRINITY_DN871_c1_g2;TRINITY_DN871_c1_g1;TRINITY_DN898_c1_g1;TRINITY_DN898_c0_g1;TRINITY_DN935_c11_g1;TRINITY_DN935_c0_g1;TRINITY_DN944_c0_g1;TRINITY_DN944_c0_g2;TRINITY_DN906_c2_g1;TRINITY_DN1288_c11…
Peroxisome	Transport and catabolism	Cellular Processes	66	K05678;K00232;K13354;K13336;K10214;K00106;K13339;K00649;K01897;K13338;K11517;K13353;K07753;K07513;K05676;K13348;K13239;K00306;K13299;K05677;K13279;K11187;K07514;K12663;K04564;K00869;K13356;K13351;K04565;K13342;K08764;K13237;K00477;K00308;K01578;K12261;K05675;K00624;K13352;K13341;K03781;K08746;K13241;K13343;K13273;K05940;K12405;K00031;K11992;K03426;K13340;K13335;K11147;K08726;K00803;K06664;K13346;…	152	TRINITY_DN167_c0_g1;TRINITY_DN322_c7_g2;TRINITY_DN761_c0_g1;TRINITY_DN736_c0_g1;TRINITY_DN847_c0_g1;TRINITY_DN847_c0_g2;TRINITY_DN961_c2_g1;TRINITY_DN1004_c0_g1;TRINITY_DN1046_c0_g1;TRINITY_DN1138_c1_g1;TRINITY_DN1282_c0_g1;TRINITY_DN1282_c0_g2;TRINITY_DN1390_c1_g1;TRINITY_DN1375_c1_g1;TRINITY_DN1410_c0_g1;TRINITY_DN1710_c1_g1;TRINITY_DN1946_c2_g1;TRINITY_DN1905_c2_g1;TRINITY_DN1928_c5_g1;TRINITY…
Renal cell carcinoma	Cancers: Specific types	Human Diseases	53	K00922;K04498;K13377;K02833;K06277;K06625;K04366;K03099;K09594;K09105;K03871;K04456;K04410;K07293;K07836;K04353;K04368;K04369;K08774;K04393;K04392;K05733;K09592;K05448;K02678;K04409;K07827;K02649;K07299;K09593;K13375;K03868;K04365;K13376;K02158;K09097;K04438;K03872;K04371;K03873;K08268;K05460;K05099;K05735;K09095;K04364;K13105;K03870;K01679;K17386;K15589;K05734;K05736	152	TRINITY_DN152_c0_g2;TRINITY_DN165_c1_g2;TRINITY_DN156_c1_g2;TRINITY_DN203_c0_g3;TRINITY_DN371_c0_g1;TRINITY_DN543_c0_g2;TRINITY_DN619_c0_g1;TRINITY_DN632_c0_g1;TRINITY_DN785_c2_g1;TRINITY_DN712_c1_g1;TRINITY_DN871_c1_g2;TRINITY_DN871_c1_g1;TRINITY_DN944_c0_g1;TRINITY_DN944_c0_g2;TRINITY_DN906_c2_g1;TRINITY_DN1118_c1_g1;TRINITY_DN1197_c0_g1;TRINITY_DN1264_c3_g1;TRINITY_DN1264_c5_g2;TRINITY_DN1216_…
Aminoacyl-tRNA biosynthesis	Translation	Genetic Information Processing	32	K01874;K01889;K01880;K01868;K01876;K01887;K01886;K01875;K10837;K01885;K01892;K01869;K01870;K01866;K01872;K14163;K01893;K01873;K04567;K02434;K02435;K03341;K01890;K01883;K00604;K01879;K01878;K02433;K01867;K01042;K01881;K04566	151	TRINITY_DN40_c0_g1;TRINITY_DN309_c0_g1;TRINITY_DN327_c1_g1;TRINITY_DN421_c0_g1;TRINITY_DN421_c0_g2;TRINITY_DN529_c1_g1;TRINITY_DN590_c0_g1;TRINITY_DN517_c1_g1;TRINITY_DN647_c0_g1;TRINITY_DN814_c0_g1;TRINITY_DN1365_c0_g2;TRINITY_DN1570_c2_g2;TRINITY_DN1570_c2_g1;TRINITY_DN1518_c0_g1;TRINITY_DN1589_c10_g1;TRINITY_DN1617_c0_g1;TRINITY_DN2369_c0_g1;TRINITY_DN2509_c1_g1;TRINITY_DN2616_c1_g1;TRINITY_DN…
Chagas disease (American trypanosomiasis)	Infectious diseases: Parasitic	Human Diseases	64	K04635;K04637;K04634;K00922;K08057;K13377;K04354;K04382;K04441;K04630;K07209;K03456;K03990;K04456;K04500;K02373;K04440;K04674;K03982;K05408;K04734;K02580;K07210;K14624;K04724;K02649;K05133;K04390;K13375;K13376;K04534;K05858;K04398;K10169;K05405;K04633;K04388;K04371;K05132;K04467;K03158;K06451;K13241;K03987;K04735;K10161;K10160;K06453;K03916;K08041;K04430;K04636;K04632;K06452;K03175;K03986;K05443;…	151	TRINITY_DN22_c0_g1;TRINITY_DN22_c0_g2;TRINITY_DN22_c0_g3;TRINITY_DN152_c0_g2;TRINITY_DN195_c0_g1;TRINITY_DN156_c1_g2;TRINITY_DN191_c2_g1;TRINITY_DN387_c2_g1;TRINITY_DN485_c1_g1;TRINITY_DN538_c1_g1;TRINITY_DN632_c3_g2;TRINITY_DN653_c0_g2;TRINITY_DN842_c0_g1;TRINITY_DN999_c0_g2;TRINITY_DN986_c0_g1;TRINITY_DN986_c0_g3;TRINITY_DN944_c0_g1;TRINITY_DN944_c0_g2;TRINITY_DN906_c2_g1;TRINITY_DN1102_c0_g2;T…
TGF-beta signaling pathway	Signal transduction	Environmental Information Processing	63	K03094;K04498;K19631;K13377;K16790;K04382;K04661;K04662;K04688;K04501;K03456;K04377;K04660;K16857;K04682;K04500;K04678;K04685;K17694;K04674;K03347;K04514;K19558;K04684;K04679;K04658;K04657;K13375;K03868;K13376;K04673;K19553;K17695;K04664;K04388;K04371;K04670;K17693;K04680;K04676;K04513;K04667;K04671;K04677;K04686;K16791;K13596;K10162;K04683;K04672;K13578;K16620;K04663;K04665;K16622;K04675;K04668;…	151	TRINITY_DN85_c0_g1;TRINITY_DN165_c1_g2;TRINITY_DN109_c1_g1;TRINITY_DN156_c1_g2;TRINITY_DN244_c0_g1;TRINITY_DN387_c2_g1;TRINITY_DN498_c0_g1;TRINITY_DN512_c0_g2;TRINITY_DN552_c0_g1;TRINITY_DN675_c4_g1;TRINITY_DN762_c0_g1;TRINITY_DN999_c0_g2;TRINITY_DN939_c0_g2;TRINITY_DN946_c7_g1;TRINITY_DN1044_c0_g1;TRINITY_DN1113_c0_g1;TRINITY_DN1102_c0_g2;TRINITY_DN1102_c1_g3;TRINITY_DN1102_c1_g2;TRINITY_DN1102_…
Pancreatic secretion	Digestive system	Organismal Systems	60	K04634;K05742;K04960;K01539;K05850;K05853;K01540;K08046;K08045;K13855;K07904;K07836;K04353;K04392;K08044;K04959;K07886;K01538;K10951;K05858;K04958;K14078;K14077;K04513;K08042;K04962;K01346;K07884;K13575;K04936;K05031;K04588;K07901;K02677;K01242;K04964;K01047;K05263;K19663;K08041;K14073;K14074;K04131;K04632;K08043;K04926;K18152;K08780;K08049;K08779;K14075;K01312;K01345;K05027;K05028;K08048;K12298;…	149	TRINITY_DN22_c0_g3;TRINITY_DN157_c0_g1;TRINITY_DN296_c3_g1;TRINITY_DN271_c0_g1;TRINITY_DN271_c0_g3;TRINITY_DN378_c0_g1;TRINITY_DN485_c1_g1;TRINITY_DN751_c0_g1;TRINITY_DN914_c1_g1;TRINITY_DN956_c1_g1;TRINITY_DN1003_c1_g1;TRINITY_DN1083_c1_g1;TRINITY_DN1170_c0_g1;TRINITY_DN1107_c1_g2;TRINITY_DN1264_c3_g1;TRINITY_DN1264_c5_g2;TRINITY_DN1384_c0_g1;TRINITY_DN1451_c0_g1;TRINITY_DN1451_c0_g2;TRINITY_DN1…
Signaling proteins	Unclassified: signaling and cellular processes	Not Included in Pathway or Brite	80	K08023;K16847;K16664;K06829;K09855;K17639;K17708;K19471;K14480;K13438;K16825;K16349;K16364;K06789;K19410;K16528;K06875;K17384;K19638;K06819;K08707;K16519;K16525;K05626;K15838;K06847;K16523;K06818;K05639;K06826;K16520;K19602;K16449;K18449;K16362;K16357;K06817;K15369;K04005;K06824;K17385;K19519;K19329;K16661;K09852;K09856;K19470;K16530;K17337;K16655;K02832;K16660;K18448;K16358;K18450;K17886;K15370;…	148	TRINITY_DN226_c0_g1;TRINITY_DN220_c16_g1;TRINITY_DN322_c4_g1;TRINITY_DN427_c0_g1;TRINITY_DN698_c0_g1;TRINITY_DN605_c0_g1;TRINITY_DN981_c0_g2;TRINITY_DN981_c0_g3;TRINITY_DN1031_c0_g1;TRINITY_DN1031_c0_g2;TRINITY_DN1071_c0_g1;TRINITY_DN1094_c1_g1;TRINITY_DN1193_c0_g1;TRINITY_DN1173_c1_g1;TRINITY_DN1104_c0_g1;TRINITY_DN1104_c1_g2;TRINITY_DN1110_c0_g1;TRINITY_DN1213_c0_g2;TRINITY_DN1263_c0_g1;TRINITY…
Longevity regulating pathway	Aging	Organismal Systems	56	K07187;K04527;K00922;K02833;K11420;K07298;K08331;K04688;K16184;K07207;K04456;K08046;K08045;K07296;K07297;K09048;K08044;K07206;K03259;K17589;K02580;K07827;K02649;K07359;K07201;K09408;K16172;K04564;K10141;K07208;K04451;K08733;K08339;K05459;K07205;K07199;K07198;K03781;K08042;K05870;K04345;K04450;K07203;K04735;K04374;K09047;K07202;K08041;K02159;K08043;K14756;K19730;K08049;K05087;K07200;K08048	148	TRINITY_DN70_c0_g2;TRINITY_DN164_c1_g1;TRINITY_DN152_c0_g2;TRINITY_DN203_c0_g3;TRINITY_DN312_c2_g1;TRINITY_DN452_c0_g1;TRINITY_DN540_c0_g3;TRINITY_DN552_c0_g1;TRINITY_DN681_c0_g1;TRINITY_DN802_c0_g1;TRINITY_DN944_c0_g1;TRINITY_DN944_c0_g2;TRINITY_DN906_c2_g1;TRINITY_DN956_c1_g1;TRINITY_DN1003_c1_g1;TRINITY_DN1070_c2_g3;TRINITY_DN1205_c2_g1;TRINITY_DN1322_c0_g1;TRINITY_DN1322_c0_g2;TRINITY_DN1481_…
Cell cycle - yeast	Cell growth and death	Cellular Processes	56	K03094;K06669;K04354;K02516;K06670;K04382;K03351;K03353;K03352;K03348;K03456;K02830;K06639;K02603;K02605;K02210;K02606;K03347;K06677;K03364;K03349;K06636;K06675;K03868;K03354;K06672;K03355;K02542;K06671;K02365;K02540;K06641;K02604;K06685;K08866;K06674;K03363;K02213;K02209;K18669;K06678;K02180;K02214;K03350;K02212;K06676;K06628;K02219;K02541;K02537;K06662;K02178;K02607;K03358;K02608;K02216	148	TRINITY_DN85_c0_g1;TRINITY_DN31_c0_g1;TRINITY_DN191_c2_g1;TRINITY_DN204_c0_g1;TRINITY_DN352_c3_g1;TRINITY_DN387_c2_g1;TRINITY_DN367_c3_g1;TRINITY_DN434_c1_g1;TRINITY_DN684_c0_g1;TRINITY_DN632_c3_g2;TRINITY_DN788_c1_g3;TRINITY_DN788_c1_g1;TRINITY_DN999_c0_g2;TRINITY_DN1136_c0_g1;TRINITY_DN1136_c0_g2;TRINITY_DN1254_c0_g1;TRINITY_DN1243_c0_g1;TRINITY_DN1260_c0_g4;TRINITY_DN1260_c0_g1;TRINITY_DN1260_…
Hippo signaling pathway - fly	Signal transduction	Environmental Information Processing	40	K04354;K06094;K04382;K16197;K09236;K06093;K09448;K16175;K06069;K16687;K03456;K04377;K04440;K08791;K06626;K16684;K16507;K04412;K06630;K16673;K16682;K08960;K06095;K05692;K06091;K16686;K06685;K04676;K16681;K16675;K04237;K16672;K09851;K12076;K05628;K16669;K16676;K16685;K10149;K16674	147	TRINITY_DN191_c2_g1;TRINITY_DN214_c0_g1;TRINITY_DN387_c2_g1;TRINITY_DN306_c1_g1;TRINITY_DN332_c1_g3;TRINITY_DN546_c7_g1;TRINITY_DN546_c1_g2;TRINITY_DN672_c0_g1;TRINITY_DN638_c3_g1;TRINITY_DN632_c3_g2;TRINITY_DN760_c0_g1;TRINITY_DN780_c5_g1;TRINITY_DN849_c0_g1;TRINITY_DN849_c0_g2;TRINITY_DN849_c0_g3;TRINITY_DN999_c0_g2;TRINITY_DN939_c0_g2;TRINITY_DN1287_c4_g1;TRINITY_DN1304_c7_g1;TRINITY_DN1558_c0…
IL-17 signaling pathway	Immune system	Organismal Systems	58	K04404;K11849;K10048;K13088;K04441;K03352;K12890;K07209;K04427;K05410;K09849;K02187;K07211;K07994;K02373;K05492;K04440;K04734;K05164;K02580;K03173;K07210;K04079;K14624;K09487;K06855;K04398;K05505;K05405;K05423;K11859;K03174;K05509;K04371;K19603;K05506;K05166;K04467;K13908;K12671;K04502;K05168;K04735;K16597;K11987;K01388;K09029;K03175;K12793;K03083;K05494;K14625;K05493;K05491;K04379;K05427;K09848;…	147	TRINITY_DN100_c0_g1;TRINITY_DN245_c3_g1;TRINITY_DN265_c0_g1;TRINITY_DN354_c6_g1;TRINITY_DN538_c1_g1;TRINITY_DN684_c0_g1;TRINITY_DN648_c0_g1;TRINITY_DN842_c0_g1;TRINITY_DN1077_c0_g1;TRINITY_DN1049_c0_g1;TRINITY_DN1186_c0_g1;TRINITY_DN1155_c1_g1;TRINITY_DN1120_c0_g1;TRINITY_DN1120_c0_g2;TRINITY_DN1239_c3_g2;TRINITY_DN1204_c1_g1;TRINITY_DN1348_c0_g1;TRINITY_DN1396_c0_g1;TRINITY_DN1558_c0_g1;TRINITY_…
Lipid biosynthesis proteins	Protein families: metabolism	Brite Hierarchies	55	K13523;K01895;K17361;K01074;K13509;K01896;K00645;K13512;K01068;K10247;K01897;K08772;K13506;K00507;K07753;K13510;K01908;K00665;K10258;K17362;K10703;K00629;K10244;K11993;K10224;K00142;K08746;K10203;K01907;K12417;K12419;K10226;K15013;K00666;K13699;K13515;K10225;K08745;K10205;K13517;K10251;K17360;K10249;K01716;K10806;K00631;K03621;K00648;K00647;K04712;K09458;K10250;K13513;K13516;K10248	144	TRINITY_DN147_c1_g1;TRINITY_DN116_c0_g1;TRINITY_DN116_c0_g3;TRINITY_DN220_c7_g1;TRINITY_DN414_c0_g1;TRINITY_DN414_c0_g3;TRINITY_DN674_c0_g1;TRINITY_DN664_c0_g3;TRINITY_DN747_c0_g1;TRINITY_DN839_c0_g1;TRINITY_DN870_c0_g1;TRINITY_DN1138_c1_g1;TRINITY_DN1375_c1_g1;TRINITY_DN1465_c1_g1;TRINITY_DN1552_c6_g1;TRINITY_DN1615_c0_g1;TRINITY_DN1735_c2_g1;TRINITY_DN1856_c4_g1;TRINITY_DN1856_c1_g1;TRINITY_DN1…
Chronic myeloid leukemia	Cancers: Specific types	Human Diseases	59	K06279;K17447;K00922;K13377;K06624;K02833;K06067;K10140;K11224;K06625;K04366;K03099;K04501;K08878;K07209;K04377;K04456;K07293;K02089;K08091;K04368;K04369;K04674;K03511;K04734;K04402;K02580;K07210;K06619;K07827;K04570;K02649;K13375;K04365;K04451;K13376;K08367;K02158;K06621;K04438;K04388;K04707;K04371;K04503;K14021;K04467;K02091;K04364;K17454;K04735;K09389;K11223;K06620;K04496;K17449;K06618;K17448;…	144	TRINITY_DN25_c0_g1;TRINITY_DN25_c0_g2;TRINITY_DN152_c0_g2;TRINITY_DN156_c1_g2;TRINITY_DN201_c0_g1;TRINITY_DN203_c0_g3;TRINITY_DN307_c2_g1;TRINITY_DN346_c1_g1;TRINITY_DN583_c0_g1;TRINITY_DN543_c0_g2;TRINITY_DN619_c0_g1;TRINITY_DN632_c0_g1;TRINITY_DN762_c0_g1;TRINITY_DN739_c1_g1;TRINITY_DN842_c0_g1;TRINITY_DN939_c0_g2;TRINITY_DN944_c0_g1;TRINITY_DN944_c0_g2;TRINITY_DN906_c2_g1;TRINITY_DN1197_c0_g1;…
Proteasome	Folding, sorting and degradation	Genetic Information Processing	55	K11599;K03037;K11875;K03036;K11884;K02737;K03039;K03031;K02731;K02741;K06700;K06699;K02736;K02725;K06697;K03029;K03028;K02726;K02735;K04523;K02733;K02727;K11886;K11876;K02730;K04079;K03038;K03250;K10839;K06692;K02732;K11885;K06693;K03065;K03283;K03063;K02729;K06694;K03061;K11878;K02740;K02734;K03032;K03035;K03033;K03062;K06696;K02728;K03030;K11877;K06698;K03064;K11883;K02738;K02739	142	TRINITY_DN88_c1_g2;TRINITY_DN49_c0_g2;TRINITY_DN153_c0_g4;TRINITY_DN153_c0_g5;TRINITY_DN153_c0_g6;TRINITY_DN153_c0_g2;TRINITY_DN176_c1_g3;TRINITY_DN250_c0_g2;TRINITY_DN357_c0_g1;TRINITY_DN514_c0_g3;TRINITY_DN548_c5_g2;TRINITY_DN682_c1_g2;TRINITY_DN691_c0_g1;TRINITY_DN762_c2_g1;TRINITY_DN755_c0_g2;TRINITY_DN859_c1_g1;TRINITY_DN849_c1_g1;TRINITY_DN848_c1_g1;TRINITY_DN1107_c0_g1;TRINITY_DN1155_c0_g1…
Proteasome	Protein families: genetic information processing	Brite Hierarchies	55	K11599;K03037;K11875;K03036;K11884;K02737;K03039;K03031;K02731;K02741;K06700;K06699;K02736;K02725;K06697;K03029;K03028;K02726;K02735;K04523;K02733;K02727;K11886;K11876;K02730;K04079;K03038;K03250;K10839;K06692;K02732;K11885;K06693;K03065;K03283;K03063;K02729;K06694;K03061;K11878;K02740;K02734;K03032;K03035;K03033;K03062;K06696;K02728;K03030;K11877;K06698;K03064;K11883;K02738;K02739	142	TRINITY_DN88_c1_g2;TRINITY_DN49_c0_g2;TRINITY_DN153_c0_g4;TRINITY_DN153_c0_g5;TRINITY_DN153_c0_g6;TRINITY_DN153_c0_g2;TRINITY_DN176_c1_g3;TRINITY_DN250_c0_g2;TRINITY_DN357_c0_g1;TRINITY_DN514_c0_g3;TRINITY_DN548_c5_g2;TRINITY_DN682_c1_g2;TRINITY_DN691_c0_g1;TRINITY_DN762_c2_g1;TRINITY_DN755_c0_g2;TRINITY_DN859_c1_g1;TRINITY_DN849_c1_g1;TRINITY_DN848_c1_g1;TRINITY_DN1107_c0_g1;TRINITY_DN1155_c0_g1…
Melanogenesis	Endocrine system	Organismal Systems	59	K04634;K04498;K02432;K00444;K02833;K02353;K04366;K04630;K02620;K04491;K08046;K08045;K04368;K04369;K09048;K08044;K07827;K04515;K09455;K04534;K05858;K04371;K16366;K02354;K01384;K08042;K00182;K02842;K02329;K02235;K05091;K00572;K00445;K05870;K04345;K02376;K02677;K00408;K04198;K19663;K08041;K01064;K04632;K08043;K01357;K03083;K02183;K08725;K01558;K08049;K04490;K04492;K00312;K00714;K08048;K05461;K04199;…	142	TRINITY_DN22_c0_g3;TRINITY_DN165_c1_g2;TRINITY_DN240_c0_g1;TRINITY_DN217_c11_g1;TRINITY_DN217_c0_g3;TRINITY_DN203_c0_g3;TRINITY_DN485_c1_g1;TRINITY_DN562_c1_g2;TRINITY_DN619_c0_g1;TRINITY_DN653_c0_g2;TRINITY_DN876_c1_g1;TRINITY_DN895_c0_g1;TRINITY_DN956_c1_g1;TRINITY_DN1003_c1_g1;TRINITY_DN1216_c0_g1;TRINITY_DN1216_c0_g2;TRINITY_DN1322_c0_g1;TRINITY_DN1322_c0_g2;TRINITY_DN1481_c0_g1;TRINITY_DN159…
Dilated cardiomyopathy (DCM)	Cardiovascular diseases	Human Diseases	69	K12641;K06583;K13377;K10366;K06485;K06588;K06484;K08046;K08045;K07610;K08044;K06493;K06481;K06265;K04859;K10375;K06589;K06487;K13375;K13376;K04851;K04872;K05459;K05692;K12567;K12566;K06586;K06480;K06483;K05719;K08042;K04962;K04345;K12565;K12568;K06525;K04863;K04860;K04858;K04850;K12314;K06476;K12045;K08041;K06590;K05865;K05852;K04632;K04864;K08043;K04869;K12749;K12564;K12044;K04141;K08049;K04853;…	142	TRINITY_DN74_c0_g1;TRINITY_DN67_c0_g1;TRINITY_DN156_c1_g2;TRINITY_DN205_c2_g1;TRINITY_DN264_c1_g1;TRINITY_DN316_c2_g3;TRINITY_DN459_c0_g1;TRINITY_DN956_c1_g1;TRINITY_DN1003_c1_g1;TRINITY_DN1103_c0_g1;TRINITY_DN1481_c0_g1;TRINITY_DN1812_c2_g2;TRINITY_DN1812_c2_g1;TRINITY_DN1814_c0_g1;TRINITY_DN1947_c0_g1;TRINITY_DN2024_c2_g1;TRINITY_DN2447_c0_g2;TRINITY_DN2621_c0_g1;TRINITY_DN3030_c0_g1;TRINITY_DN…
Glycolysis / Gluconeogenesis	Carbohydrate metabolism	Metabolism	40	K00128;K00850;K00162;K01895;K00134;K01623;K00627;K15779;K00002;K00382;K13997;K01810;K00016;K01689;K00927;K00161;K01835;K01596;K01834;K00873;K00129;K01084;K14085;K13951;K00149;K01785;K00121;K12406;K08074;K03103;K01837;K02446;K01803;K11645;K03841;K15633;K01610;K15634;K00138;K18857	141	TRINITY_DN47_c0_g1;TRINITY_DN20_c0_g1;TRINITY_DN20_c0_g2;TRINITY_DN20_c0_g3;TRINITY_DN8_c0_g1;TRINITY_DN176_c4_g1;TRINITY_DN116_c0_g1;TRINITY_DN116_c0_g3;TRINITY_DN297_c3_g1;TRINITY_DN236_c0_g1;TRINITY_DN376_c0_g1;TRINITY_DN1140_c0_g1;TRINITY_DN1295_c2_g2;TRINITY_DN1205_c4_g1;TRINITY_DN1374_c0_g2;TRINITY_DN1498_c0_g1;TRINITY_DN1540_c1_g1;TRINITY_DN1626_c0_g1;TRINITY_DN1681_c1_g1;TRINITY_DN1613_c1…
Insulin secretion	Endocrine system	Organismal Systems	54	K04635;K04634;K04960;K01539;K01540;K08046;K08045;K15297;K09048;K08044;K04945;K04942;K04515;K01538;K07299;K04560;K05858;K04851;K07882;K05258;K04944;K04979;K04581;K04937;K08042;K04587;K04962;K04936;K04943;K05870;K04345;K04351;K04450;K02677;K04850;K05274;K04374;K09047;K19663;K08041;K04131;K04632;K16882;K08043;K05262;K04939;K04941;K08049;K04853;K08048;K18211;K05032;K04857;K19662	140	TRINITY_DN22_c0_g1;TRINITY_DN22_c0_g3;TRINITY_DN296_c3_g1;TRINITY_DN271_c0_g1;TRINITY_DN271_c0_g3;TRINITY_DN485_c1_g1;TRINITY_DN914_c1_g1;TRINITY_DN956_c1_g1;TRINITY_DN1003_c1_g1;TRINITY_DN1306_c3_g1;TRINITY_DN1322_c0_g1;TRINITY_DN1322_c0_g2;TRINITY_DN1384_c0_g1;TRINITY_DN1481_c0_g1;TRINITY_DN1590_c0_g2;TRINITY_DN1810_c1_g1;TRINITY_DN1973_c0_g1;TRINITY_DN2045_c1_g1;TRINITY_DN2045_c2_g1;TRINITY_DN…
Shigellosis	Infectious diseases: Bacterial	Human Diseases	43	K05758;K05700;K05757;K03362;K06484;K05754;K04441;K05748;K12836;K07209;K04393;K17388;K04392;K19241;K04440;K08727;K04734;K02580;K07210;K05747;K06619;K04514;K05759;K08339;K04438;K05756;K06106;K05692;K05704;K05740;K04371;K08846;K02581;K05719;K04467;K13728;K05753;K18985;K04735;K12366;K10165;K13708;K05755	139	TRINITY_DN56_c2_g2;TRINITY_DN336_c0_g1;TRINITY_DN316_c0_g1;TRINITY_DN332_c1_g1;TRINITY_DN459_c0_g1;TRINITY_DN428_c4_g3;TRINITY_DN538_c1_g1;TRINITY_DN665_c4_g1;TRINITY_DN790_c0_g1;TRINITY_DN712_c9_g1;TRINITY_DN877_c6_g1;TRINITY_DN842_c0_g1;TRINITY_DN980_c0_g2;TRINITY_DN1380_c1_g2;TRINITY_DN1380_c1_g1;TRINITY_DN1342_c1_g1;TRINITY_DN1451_c0_g1;TRINITY_DN1451_c0_g2;TRINITY_DN1434_c0_g1;TRINITY_DN1558…
Morphine addiction	Substance dependence	Human Diseases	52	K04542;K04615;K13755;K19021;K18436;K08291;K04630;K08046;K08045;K08044;K18283;K00910;K04439;K04536;K13293;K18437;K04344;K04849;K04549;K04534;K04538;K13296;K07826;K08042;K04345;K04999;K04539;K04545;K02677;K05184;K19663;K08041;K04632;K04265;K07825;K04537;K08043;K04541;K05186;K05181;K05175;K13298;K08049;K04543;K05002;K05189;K18438;K05190;K08048;K04144;K04544;K19662	139	TRINITY_DN43_c0_g2;TRINITY_DN48_c1_g1;TRINITY_DN175_c0_g1;TRINITY_DN240_c2_g1;TRINITY_DN480_c1_g1;TRINITY_DN447_c1_g1;TRINITY_DN649_c1_g1;TRINITY_DN653_c0_g2;TRINITY_DN956_c1_g1;TRINITY_DN1003_c1_g1;TRINITY_DN1481_c0_g1;TRINITY_DN1458_c0_g1;TRINITY_DN1467_c3_g1;TRINITY_DN1467_c2_g1;TRINITY_DN1546_c0_g1;TRINITY_DN1714_c1_g3;TRINITY_DN1714_c1_g1;TRINITY_DN2016_c3_g1;TRINITY_DN2227_c0_g1;TRINITY_DN2…
Pancreatic cancer	Cancers: Specific types	Human Diseases	58	K00922;K13377;K10140;K07861;K06625;K04688;K04366;K04501;K07209;K08773;K04456;K04500;K02089;K04368;K08774;K04393;K04392;K04440;K04674;K03511;K05448;K04402;K02580;K07210;K07827;K04570;K02649;K08775;K08732;K13375;K05083;K04365;K04451;K13376;K02158;K06621;K11217;K04388;K04371;K04692;K04357;K04503;K14021;K04467;K05729;K02091;K17454;K07835;K07860;K07203;K07834;K04735;K09389;K06620;K06618;K02159;K04482;…	138	TRINITY_DN152_c0_g2;TRINITY_DN156_c1_g2;TRINITY_DN346_c1_g1;TRINITY_DN367_c0_g1;TRINITY_DN543_c0_g2;TRINITY_DN552_c0_g1;TRINITY_DN619_c0_g1;TRINITY_DN762_c0_g1;TRINITY_DN842_c0_g1;TRINITY_DN878_c0_g1;TRINITY_DN944_c0_g1;TRINITY_DN944_c0_g2;TRINITY_DN906_c2_g1;TRINITY_DN1102_c0_g2;TRINITY_DN1102_c1_g3;TRINITY_DN1102_c1_g2;TRINITY_DN1102_c1_g1;TRINITY_DN1268_c0_g1;TRINITY_DN1216_c0_g1;TRINITY_DN120…
Olfactory transduction	Sensory system	Organismal Systems	23	K13755;K05849;K07376;K18283;K00910;K04439;K04536;K04515;K19695;K04257;K04633;K18154;K04345;K12321;K13752;K08043;K02183;K04951;K04949;K04952;K04543;K19477;K04950	137	TRINITY_DN175_c0_g1;TRINITY_DN665_c6_g1;TRINITY_DN804_c1_g1;TRINITY_DN1458_c0_g1;TRINITY_DN1467_c3_g1;TRINITY_DN1467_c2_g1;TRINITY_DN1546_c0_g1;TRINITY_DN1714_c1_g3;TRINITY_DN1714_c1_g1;TRINITY_DN2197_c0_g2;TRINITY_DN2378_c0_g3;TRINITY_DN2714_c1_g1;TRINITY_DN3849_c0_g1;TRINITY_DN3906_c1_g1;TRINITY_DN4230_c0_g2;TRINITY_DN4302_c0_g1;TRINITY_DN4526_c0_g1;TRINITY_DN4526_c0_g2;TRINITY_DN5351_c0_g1;TRI…
Inositol phosphate metabolism	Carbohydrate metabolism	Metabolism	39	K01099;K00888;K01106;K00922;K00889;K03084;K00923;K19006;K00911;K00920;K01092;K05857;K18081;K01107;K15759;K15909;K01110;K18083;K01858;K01116;K01109;K05858;K00921;K13711;K00999;K00915;K00140;K18086;K10572;K18082;K05860;K00914;K00469;K00913;K05859;K03103;K01108;K01803;K13712	137	TRINITY_DN72_c2_g1;TRINITY_DN49_c0_g1;TRINITY_DN128_c2_g2;TRINITY_DN152_c0_g2;TRINITY_DN176_c2_g2;TRINITY_DN249_c0_g1;TRINITY_DN285_c0_g1;TRINITY_DN288_c6_g1;TRINITY_DN331_c0_g1;TRINITY_DN370_c2_g1;TRINITY_DN333_c1_g1;TRINITY_DN493_c0_g1;TRINITY_DN492_c1_g2;TRINITY_DN582_c0_g4;TRINITY_DN733_c0_g1;TRINITY_DN744_c1_g1;TRINITY_DN849_c3_g1;TRINITY_DN828_c5_g2;TRINITY_DN932_c0_g1;TRINITY_DN906_c2_g1;T…
Epithelial cell signaling in Helicobacter pylori infection	Infectious diseases: Bacterial	Human Diseases	49	K06735;K04441;K05737;K05854;K02149;K02154;K07209;K05701;K03661;K02147;K02187;K07293;K04393;K04392;K04440;K08727;K04734;K02148;K02580;K07210;K06704;K04409;K06785;K06059;K02144;K03662;K01116;K02145;K02150;K05728;K05704;K08114;K05099;K04467;K06786;K02146;K04735;K02155;K02153;K04430;K04175;K05050;K05859;K02151;K04361;K04466;K12499;K02152;K08523	136	TRINITY_DN370_c1_g1;TRINITY_DN538_c1_g1;TRINITY_DN573_c0_g2;TRINITY_DN572_c1_g1;TRINITY_DN784_c0_g1;TRINITY_DN775_c0_g1;TRINITY_DN775_c0_g2;TRINITY_DN775_c0_g3;TRINITY_DN842_c0_g1;TRINITY_DN978_c0_g2;TRINITY_DN1043_c0_g1;TRINITY_DN1125_c1_g1;TRINITY_DN1155_c1_g1;TRINITY_DN1197_c0_g1;TRINITY_DN1235_c6_g1;TRINITY_DN1380_c1_g2;TRINITY_DN1380_c1_g1;TRINITY_DN1451_c0_g1;TRINITY_DN1451_c0_g2;TRINITY_DN…
PPAR signaling pathway	Endocrine system	Organismal Systems	46	K08765;K08767;K00232;K08761;K08752;K06276;K10214;K19523;K07296;K01897;K19524;K08536;K00507;K01596;K07513;K17284;K06086;K07514;K08757;K00249;K08764;K08771;K00488;K08746;K00864;K08766;K10226;K15013;K08754;K00255;K01059;K08745;K07294;K08758;K01388;K08755;K08763;K04504;K08748;K07425;K06259;K08750;K08768;K09025;K08749;K08770	135	TRINITY_DN123_c0_g1;TRINITY_DN235_c1_g1;TRINITY_DN322_c7_g2;TRINITY_DN410_c0_g1;TRINITY_DN410_c0_g2;TRINITY_DN665_c3_g1;TRINITY_DN779_c2_g1;TRINITY_DN847_c0_g1;TRINITY_DN847_c0_g2;TRINITY_DN824_c0_g1;TRINITY_DN1070_c2_g3;TRINITY_DN1138_c1_g1;TRINITY_DN1390_c1_g1;TRINITY_DN1375_c1_g1;TRINITY_DN1482_c0_g1;TRINITY_DN1522_c0_g2;TRINITY_DN1856_c4_g1;TRINITY_DN1856_c1_g1;TRINITY_DN1905_c0_g1;TRINITY_DN…
Salivary secretion	Digestive system	Organismal Systems	49	K13912;K04634;K05742;K04960;K04963;K01539;K05850;K04975;K07376;K01540;K08046;K08045;K13855;K08044;K04959;K04945;K04143;K01538;K10951;K05858;K04958;K13908;K08042;K04936;K04345;K04135;K02677;K01242;K19663;K04137;K08041;K04131;K04632;K13915;K08043;K13879;K02183;K18152;K04141;K08049;K12319;K13240;K12318;K19477;K13916;K13899;K08048;K09867;K19662	133	TRINITY_DN41_c0_g2;TRINITY_DN22_c0_g3;TRINITY_DN157_c0_g1;TRINITY_DN296_c3_g1;TRINITY_DN258_c7_g1;TRINITY_DN271_c0_g1;TRINITY_DN271_c0_g3;TRINITY_DN378_c0_g1;TRINITY_DN406_c0_g1;TRINITY_DN485_c1_g1;TRINITY_DN804_c1_g1;TRINITY_DN914_c1_g1;TRINITY_DN956_c1_g1;TRINITY_DN1003_c1_g1;TRINITY_DN1170_c0_g1;TRINITY_DN1158_c1_g1;TRINITY_DN1384_c0_g1;TRINITY_DN1481_c0_g1;TRINITY_DN1973_c0_g1;TRINITY_DN1973_…
Arachidonic acid metabolism	Lipid metabolism	Metabolism	31	K18592;K07418;K00509;K00432;K17726;K00079;K00458;K16343;K00461;K16342;K01254;K16817;K05309;K07422;K00460;K07412;K01832;K07413;K14621;K01047;K11987;K15729;K08726;K15717;K07425;K01831;K07415;K00081;K15730;K01830;K17728	133	TRINITY_DN541_c0_g1;TRINITY_DN663_c6_g1;TRINITY_DN636_c1_g2;TRINITY_DN636_c1_g1;TRINITY_DN734_c0_g1;TRINITY_DN766_c1_g1;TRINITY_DN935_c2_g1;TRINITY_DN1215_c4_g1;TRINITY_DN1215_c1_g1;TRINITY_DN1215_c0_g1;TRINITY_DN1529_c0_g1;TRINITY_DN1561_c0_g1;TRINITY_DN1676_c0_g1;TRINITY_DN1737_c2_g1;TRINITY_DN2057_c1_g1;TRINITY_DN2062_c1_g1;TRINITY_DN2524_c0_g1;TRINITY_DN2524_c0_g2;TRINITY_DN2524_c0_g3;TRINITY…
Chemical carcinogenesis	Cancers: Overview	Human Diseases	20	K00816;K00799;K00079;K13299;K09097;K00699;K00129;K01253;K01014;K07410;K13951;K07424;K07412;K07413;K00121;K11987;K15680;K00622;K07415;K04809	131	TRINITY_DN110_c3_g1;TRINITY_DN243_c0_g1;TRINITY_DN287_c4_g1;TRINITY_DN1450_c1_g1;TRINITY_DN1529_c0_g1;TRINITY_DN2098_c4_g1;TRINITY_DN2098_c1_g3;TRINITY_DN2098_c1_g1;TRINITY_DN2226_c9_g1;TRINITY_DN2245_c0_g1;TRINITY_DN2245_c0_g2;TRINITY_DN2314_c0_g1;TRINITY_DN2867_c0_g2;TRINITY_DN3147_c0_g1;TRINITY_DN3147_c0_g3;TRINITY_DN3486_c0_g1;TRINITY_DN3577_c0_g1;TRINITY_DN3577_c0_g2;TRINITY_DN3785_c4_g1;TRI…
Thyroid hormone synthesis	Endocrine system	Organismal Systems	46	K04634;K04960;K01539;K00432;K01540;K08046;K08045;K09582;K09293;K09048;K08044;K06233;K04959;K09487;K15225;K09490;K01538;K05858;K04958;K00383;K10064;K08042;K17231;K05870;K04345;K04450;K17232;K14702;K02677;K04374;K09047;K19663;K08041;K14385;K04632;K00431;K08043;K04249;K15173;K16141;K08049;K08054;K08048;K05251;K10809;K19662	131	TRINITY_DN22_c0_g3;TRINITY_DN296_c3_g1;TRINITY_DN271_c0_g1;TRINITY_DN271_c0_g3;TRINITY_DN485_c1_g1;TRINITY_DN766_c1_g1;TRINITY_DN914_c1_g1;TRINITY_DN956_c1_g1;TRINITY_DN1003_c1_g1;TRINITY_DN1330_c0_g2;TRINITY_DN1363_c0_g1;TRINITY_DN1322_c0_g1;TRINITY_DN1322_c0_g2;TRINITY_DN1384_c0_g1;TRINITY_DN1481_c0_g1;TRINITY_DN1590_c0_g2;TRINITY_DN1880_c2_g1;TRINITY_DN1810_c1_g1;TRINITY_DN1973_c0_g1;TRINITY_D…
Long-term potentiation	Nervous system	Organismal Systems	36	K04634;K04498;K04960;K02833;K04366;K07836;K04353;K04368;K04369;K04348;K04959;K08014;K07827;K04515;K05212;K05211;K06269;K05198;K04365;K05858;K04958;K04371;K06268;K05197;K04373;K04345;K02677;K04850;K04374;K19663;K08041;K02183;K04603;K05208;K08048;K19662	131	TRINITY_DN22_c0_g3;TRINITY_DN165_c1_g2;TRINITY_DN296_c3_g1;TRINITY_DN203_c0_g3;TRINITY_DN485_c1_g1;TRINITY_DN619_c0_g1;TRINITY_DN1264_c3_g1;TRINITY_DN1264_c5_g2;TRINITY_DN1216_c0_g1;TRINITY_DN1216_c0_g2;TRINITY_DN1311_c0_g1;TRINITY_DN1973_c0_g1;TRINITY_DN1973_c0_g2;TRINITY_DN2077_c0_g1;TRINITY_DN2183_c2_g1;TRINITY_DN2197_c0_g2;TRINITY_DN2123_c1_g3;TRINITY_DN2123_c2_g1;TRINITY_DN2123_c1_g5;TRINITY…
Acute myeloid leukemia	Cancers: Specific types	Human Diseases	48	K00922;K02833;K11224;K04688;K04366;K03099;K02620;K04491;K02633;K07209;K04377;K04456;K04368;K04369;K05090;K02580;K07210;K10054;K07827;K02649;K08806;K04365;K08367;K02158;K07205;K10051;K04371;K04692;K04503;K04467;K05092;K05091;K04364;K07203;K09438;K04735;K11223;K10053;K10056;K08527;K04702;K04504;K10055;K06498;K04490;K04492;K05427;K04391	130	TRINITY_DN152_c0_g2;TRINITY_DN203_c0_g3;TRINITY_DN583_c0_g1;TRINITY_DN552_c0_g1;TRINITY_DN619_c0_g1;TRINITY_DN632_c0_g1;TRINITY_DN876_c1_g1;TRINITY_DN895_c0_g1;TRINITY_DN834_c0_g1;TRINITY_DN842_c0_g1;TRINITY_DN939_c0_g2;TRINITY_DN944_c0_g1;TRINITY_DN944_c0_g2;TRINITY_DN906_c2_g1;TRINITY_DN1194_c0_g2;TRINITY_DN1216_c0_g1;TRINITY_DN1216_c0_g2;TRINITY_DN1541_c0_g4;TRINITY_DN1823_c0_g1;TRINITY_DN1823…
Long-term depression	Nervous system	Organismal Systems	41	K04346;K04635;K04634;K04960;K04639;K02833;K04382;K05199;K05854;K04366;K04535;K04630;K07376;K03456;K04368;K04369;K04959;K16342;K07827;K04344;K05198;K04365;K04534;K05858;K04958;K05459;K04371;K05197;K04961;K02677;K19663;K04632;K05087;K04578;K12319;K13240;K05207;K12318;K19477;K04603;K19662	130	TRINITY_DN22_c0_g5;TRINITY_DN22_c0_g1;TRINITY_DN22_c0_g3;TRINITY_DN296_c3_g1;TRINITY_DN251_c9_g1;TRINITY_DN203_c0_g3;TRINITY_DN387_c2_g1;TRINITY_DN485_c1_g1;TRINITY_DN501_c3_g1;TRINITY_DN572_c1_g1;TRINITY_DN619_c0_g1;TRINITY_DN653_c0_g1;TRINITY_DN653_c0_g2;TRINITY_DN804_c1_g1;TRINITY_DN999_c0_g2;TRINITY_DN1216_c0_g1;TRINITY_DN1216_c0_g2;TRINITY_DN1973_c0_g1;TRINITY_DN1973_c0_g2;TRINITY_DN2057_c1_…
Hypertrophic cardiomyopathy (HCM)	Cardiovascular diseases	Human Diseases	63	K12641;K06583;K13377;K10366;K06485;K06588;K06484;K07610;K06493;K06481;K06265;K04859;K10375;K06589;K06487;K13375;K13376;K04851;K04872;K05459;K05405;K05692;K07199;K12567;K07198;K12566;K06586;K16366;K06480;K06483;K05719;K04962;K12565;K12568;K06525;K04863;K04860;K04858;K04850;K12314;K06476;K12045;K06590;K05865;K04864;K04869;K12749;K12564;K12044;K04853;K06591;K04865;K07200;K12569;K04861;K06584;K04862;…	128	TRINITY_DN74_c0_g1;TRINITY_DN67_c0_g1;TRINITY_DN156_c1_g2;TRINITY_DN205_c2_g1;TRINITY_DN264_c1_g1;TRINITY_DN316_c2_g3;TRINITY_DN459_c0_g1;TRINITY_DN1103_c0_g1;TRINITY_DN1812_c2_g2;TRINITY_DN1812_c2_g1;TRINITY_DN1814_c0_g1;TRINITY_DN1947_c0_g1;TRINITY_DN2024_c2_g1;TRINITY_DN2447_c0_g2;TRINITY_DN2621_c0_g1;TRINITY_DN3030_c0_g1;TRINITY_DN3075_c0_g1;TRINITY_DN3246_c1_g1;TRINITY_DN3214_c0_g2;TRINITY_D…
Th1 and Th2 cell differentiation	Immune system	Organismal Systems	52	K06061;K17895;K06053;K11224;K04441;K07209;K07362;K04446;K04348;K02599;K11219;K04440;K06752;K04734;K11218;K02580;K11225;K07210;K06052;K05070;K01116;K05872;K05068;K05133;K09035;K07360;K11217;K04371;K05132;K06051;K05071;K02581;K06268;K04467;K06451;K09279;K04735;K05064;K11223;K11222;K18052;K10166;K06453;K04447;K05069;K05063;K06452;K05406;K06450;K04379;K06454;K17333	126	TRINITY_DN165_c1_g1;TRINITY_DN110_c4_g1;TRINITY_DN477_c1_g2;TRINITY_DN583_c0_g1;TRINITY_DN538_c1_g1;TRINITY_DN842_c0_g1;TRINITY_DN1202_c0_g1;TRINITY_DN1222_c1_g1;TRINITY_DN1311_c0_g1;TRINITY_DN1328_c11_g1;TRINITY_DN1398_c0_g1;TRINITY_DN1378_c0_g1;TRINITY_DN1435_c0_g1;TRINITY_DN1558_c0_g1;TRINITY_DN1558_c0_g2;TRINITY_DN1550_c0_g1;TRINITY_DN1606_c0_g2;TRINITY_DN1724_c0_g1;TRINITY_DN1704_c0_g1;TRINI…
Glioma	Cancers: Specific types	Human Diseases	50	K06279;K17447;K00922;K02833;K10140;K06625;K04366;K03099;K04456;K02089;K04368;K04369;K08774;K05089;K04363;K03511;K01110;K04402;K07827;K04515;K04359;K02649;K01116;K04365;K04451;K06621;K05459;K04371;K04357;K04503;K14021;K02091;K04364;K17454;K07203;K02677;K09389;K06620;K19663;K17449;K06618;K17448;K02159;K05859;K17386;K02183;K04361;K05087;K06643;K19662	126	TRINITY_DN25_c0_g1;TRINITY_DN25_c0_g2;TRINITY_DN152_c0_g2;TRINITY_DN203_c0_g3;TRINITY_DN346_c1_g1;TRINITY_DN543_c0_g2;TRINITY_DN619_c0_g1;TRINITY_DN632_c0_g1;TRINITY_DN944_c0_g1;TRINITY_DN944_c0_g2;TRINITY_DN906_c2_g1;TRINITY_DN1268_c0_g1;TRINITY_DN1216_c0_g1;TRINITY_DN1216_c0_g2;TRINITY_DN1204_c6_g1;TRINITY_DN1590_c0_g3;TRINITY_DN1541_c0_g2;TRINITY_DN1541_c0_g3;TRINITY_DN1552_c1_g1;TRINITY_DN177…
Cytochrome P450	Protein families: metabolism	Brite Hierarchies	36	K00490;K07418;K07434;K17726;K00513;K07430;K07422;K00497;K00488;K07410;K12664;K07420;K07416;K07424;K07412;K07427;K01832;K07413;K07417;K07440;K00498;K07438;K07425;K01831;K07411;K17731;K07419;K07437;K07415;K07414;K07436;K05917;K12665;K04123;K07426;K17728	126	TRINITY_DN452_c1_g1;TRINITY_DN663_c6_g1;TRINITY_DN636_c1_g2;TRINITY_DN636_c1_g1;TRINITY_DN783_c2_g1;TRINITY_DN935_c2_g1;TRINITY_DN1131_c0_g1;TRINITY_DN1215_c4_g1;TRINITY_DN1215_c1_g1;TRINITY_DN1215_c0_g1;TRINITY_DN1482_c2_g1;TRINITY_DN2524_c0_g1;TRINITY_DN2524_c0_g2;TRINITY_DN2524_c0_g3;TRINITY_DN2524_c1_g3;TRINITY_DN2524_c1_g2;TRINITY_DN3367_c2_g1;TRINITY_DN3643_c2_g1;TRINITY_DN3676_c0_g1;TRINIT…
Pathogenic Escherichia coli infection	Infectious diseases: Bacterial	Human Diseases	28	K05758;K10168;K05757;K05754;K06088;K04393;K17388;K05689;K05747;K06619;K04514;K12791;K07374;K07365;K07375;K05756;K06106;K05692;K04513;K05719;K05703;K02677;K08007;K10160;K05400;K11294;K04391;K05755	126	TRINITY_DN56_c2_g2;TRINITY_DN118_c1_g1;TRINITY_DN316_c0_g1;TRINITY_DN428_c4_g3;TRINITY_DN741_c0_g1;TRINITY_DN1380_c1_g2;TRINITY_DN1380_c1_g1;TRINITY_DN1342_c1_g1;TRINITY_DN1808_c4_g1;TRINITY_DN1968_c4_g1;TRINITY_DN2045_c4_g1;TRINITY_DN2054_c0_g1;TRINITY_DN2182_c2_g1;TRINITY_DN2283_c2_g1;TRINITY_DN2366_c2_g1;TRINITY_DN2395_c2_g1;TRINITY_DN2579_c0_g1;TRINITY_DN2729_c6_g1;TRINITY_DN2762_c0_g1;TRINIT…
Autophagy - yeast	Transport and catabolism	Cellular Processes	36	K08337;K08269;K17906;K04382;K08331;K15296;K17908;K17907;K03237;K00654;K17890;K16196;K08342;K18584;K08334;K17260;K14209;K18083;K07827;K07756;K08516;K08341;K08339;K00915;K08336;K08333;K00914;K04345;K07203;K17606;K12479;K08343;K17888;K08266;K08493;K17607	125	TRINITY_DN29_c5_g1;TRINITY_DN270_c0_g1;TRINITY_DN270_c0_g2;TRINITY_DN387_c2_g1;TRINITY_DN409_c0_g1;TRINITY_DN417_c0_g1;TRINITY_DN540_c0_g3;TRINITY_DN550_c0_g1;TRINITY_DN632_c1_g1;TRINITY_DN615_c0_g1;TRINITY_DN784_c0_g2;TRINITY_DN723_c0_g1;TRINITY_DN723_c0_g3;TRINITY_DN923_c2_g1;TRINITY_DN1025_c0_g1;TRINITY_DN1065_c0_g1;TRINITY_DN1065_c0_g2;TRINITY_DN1093_c0_g1;TRINITY_DN1093_c0_g2;TRINITY_DN1140_…
Metabolism of xenobiotics by cytochrome P450	Xenobiotics biodegradation and metabolism	Metabolism	16	K00799;K00078;K00079;K13299;K00699;K00129;K01253;K07410;K13951;K15303;K07420;K07416;K00121;K15680;K07415;K00081	124	TRINITY_DN243_c0_g1;TRINITY_DN287_c4_g1;TRINITY_DN308_c0_g2;TRINITY_DN1450_c1_g1;TRINITY_DN1529_c0_g1;TRINITY_DN2098_c4_g1;TRINITY_DN2098_c1_g3;TRINITY_DN2098_c1_g1;TRINITY_DN2226_c9_g1;TRINITY_DN2245_c0_g1;TRINITY_DN2245_c0_g2;TRINITY_DN2314_c0_g1;TRINITY_DN3147_c0_g1;TRINITY_DN3147_c0_g3;TRINITY_DN3577_c0_g1;TRINITY_DN3577_c0_g2;TRINITY_DN3785_c4_g1;TRINITY_DN3873_c0_g1;TRINITY_DN4044_c0_g1;TRI…
Amino sugar and nucleotide sugar metabolism	Carbohydrate metabolism	Metabolism	45	K00326;K00972;K00966;K01784;K12373;K05305;K01836;K17497;K01639;K01443;K15779;K01810;K12409;K01835;K05304;K00983;K00844;K00012;K08080;K00820;K00963;K00849;K01809;K02564;K00884;K02377;K01787;K00976;K01711;K00965;K08678;K00075;K04042;K01788;K00885;K10011;K07806;K10012;K01207;K01097;K00790;K00975;K07106;K12450;K08679	124	TRINITY_DN11_c2_g1;TRINITY_DN542_c0_g1;TRINITY_DN576_c0_g1;TRINITY_DN689_c0_g1;TRINITY_DN739_c0_g1;TRINITY_DN744_c0_g1;TRINITY_DN871_c0_g1;TRINITY_DN871_c0_g3;TRINITY_DN848_c0_g2;TRINITY_DN951_c0_g2;TRINITY_DN984_c2_g1;TRINITY_DN1096_c0_g1;TRINITY_DN1229_c0_g1;TRINITY_DN1205_c4_g1;TRINITY_DN1365_c1_g1;TRINITY_DN1539_c3_g1;TRINITY_DN1626_c0_g1;TRINITY_DN1662_c0_g1;TRINITY_DN1822_c0_g1;TRINITY_DN20…
Valine, leucine and isoleucine degradation	Amino acid metabolism	Metabolism	43	K00128;K11538;K00157;K07515;K01027;K00382;K00248;K00022;K07509;K07513;K00626;K05605;K00020;K07514;K09699;K00249;K01968;K01641;K14085;K07511;K00140;K00253;K01907;K07508;K18660;K00149;K00167;K08683;K01965;K00166;K00826;K05607;K01966;K01847;K09478;K01640;K01782;K05606;K00827;K00632;K01969;K01825;K13524	124	TRINITY_DN47_c0_g1;TRINITY_DN360_c0_g1;TRINITY_DN668_c1_g1;TRINITY_DN985_c2_g1;TRINITY_DN1050_c0_g2;TRINITY_DN1254_c0_g3;TRINITY_DN1498_c0_g1;TRINITY_DN1613_c0_g1;TRINITY_DN1691_c3_g1;TRINITY_DN1691_c3_g2;TRINITY_DN1834_c1_g1;TRINITY_DN1905_c2_g1;TRINITY_DN2173_c1_g1;TRINITY_DN2289_c0_g1;TRINITY_DN2357_c0_g1;TRINITY_DN2495_c0_g1;TRINITY_DN2583_c0_g2;TRINITY_DN2767_c0_g2;TRINITY_DN2870_c0_g1;TRINI…
Toll-like receptor signaling pathway	Immune system	Organismal Systems	61	K05411;K10168;K00922;K04404;K04441;K01371;K05130;K07209;K04456;K04403;K04427;K05410;K04431;K07211;K04368;K04369;K02373;K04392;K04440;K05408;K04734;K02580;K07210;K02649;K04398;K04432;K10169;K05405;K03174;K04371;K02861;K05413;K04467;K05414;K05131;K12671;K04415;K05399;K12964;K04735;K10161;K10160;K05400;K05409;K04430;K06250;K04433;K03175;K12499;K05404;K05402;K03160;K05412;K05406;K10170;K05842;K09446;…	123	TRINITY_DN15_c0_g1;TRINITY_DN118_c1_g1;TRINITY_DN152_c0_g2;TRINITY_DN100_c0_g1;TRINITY_DN538_c1_g1;TRINITY_DN714_c1_g1;TRINITY_DN725_c0_g1;TRINITY_DN842_c0_g1;TRINITY_DN944_c0_g1;TRINITY_DN944_c0_g2;TRINITY_DN906_c2_g1;TRINITY_DN1028_c0_g1;TRINITY_DN1077_c0_g1;TRINITY_DN1049_c0_g1;TRINITY_DN1149_c1_g1;TRINITY_DN1120_c0_g1;TRINITY_DN1120_c0_g2;TRINITY_DN1216_c0_g1;TRINITY_DN1216_c0_g2;TRINITY_DN12…
Melanoma	Cancers: Specific types	Human Diseases	44	K04362;K04358;K00922;K02833;K10140;K06625;K04366;K04456;K02089;K04368;K04369;K05089;K04363;K03511;K18497;K01110;K04402;K05689;K07827;K04359;K09455;K02649;K04365;K04451;K05450;K02158;K06621;K05459;K04371;K04357;K04503;K14021;K05460;K05099;K02091;K17454;K09389;K06620;K06618;K02159;K17386;K04361;K05087;K06643	122	TRINITY_DN86_c3_g1;TRINITY_DN86_c3_g3;TRINITY_DN86_c3_g4;TRINITY_DN153_c1_g1;TRINITY_DN152_c0_g2;TRINITY_DN203_c0_g3;TRINITY_DN346_c1_g1;TRINITY_DN543_c0_g2;TRINITY_DN619_c0_g1;TRINITY_DN944_c0_g1;TRINITY_DN944_c0_g2;TRINITY_DN906_c2_g1;TRINITY_DN1268_c0_g1;TRINITY_DN1285_c3_g1;TRINITY_DN1216_c0_g1;TRINITY_DN1216_c0_g2;TRINITY_DN1590_c0_g3;TRINITY_DN1541_c0_g2;TRINITY_DN1541_c0_g3;TRINITY_DN1552_…
NF-kappa B signaling pathway	Signal transduction	Environmental Information Processing	70	K12646;K16060;K04404;K03115;K05854;K07209;K04403;K04427;K09849;K03159;K04725;K07362;K10577;K09253;K04734;K10130;K02580;K03173;K07210;K04469;K03097;K04570;K02161;K04724;K07368;K10652;K05476;K01116;K07360;K05147;K11859;K03174;K06527;K04728;K03157;K02861;K04467;K03158;K07370;K16595;K05399;K12964;K04735;K16065;K07369;K10160;K11987;K18052;K05400;K07371;K03172;K01348;K05409;K05855;K06490;K05859;K03175;…	121	TRINITY_DN45_c0_g1;TRINITY_DN111_c2_g1;TRINITY_DN100_c0_g1;TRINITY_DN264_c2_g2;TRINITY_DN332_c0_g1;TRINITY_DN572_c1_g1;TRINITY_DN842_c0_g1;TRINITY_DN1028_c0_g1;TRINITY_DN1077_c0_g1;TRINITY_DN1186_c0_g1;TRINITY_DN1108_c0_g1;TRINITY_DN1112_c1_g1;TRINITY_DN1202_c0_g1;TRINITY_DN1316_c0_g2;TRINITY_DN1426_c0_g1;TRINITY_DN1724_c0_g1;TRINITY_DN1783_c0_g1;TRINITY_DN1823_c0_g1;TRINITY_DN1823_c0_g2;TRINITY_…
Prolactin signaling pathway	Endocrine system	Organismal Systems	47	K06279;K17447;K00922;K02833;K11224;K04441;K04366;K03099;K04456;K04368;K04369;K04440;K02580;K04699;K07827;K04248;K02649;K04696;K09408;K05081;K10151;K05147;K08551;K04694;K05704;K09444;K04371;K04697;K04692;K04503;K04695;K04364;K04698;K04735;K11223;K00965;K04447;K17449;K08550;K17448;K04701;K03083;K17107;K17101;K04379;K00501;K05473	121	TRINITY_DN25_c0_g1;TRINITY_DN25_c0_g2;TRINITY_DN152_c0_g2;TRINITY_DN203_c0_g3;TRINITY_DN583_c0_g1;TRINITY_DN538_c1_g1;TRINITY_DN619_c0_g1;TRINITY_DN632_c0_g1;TRINITY_DN944_c0_g1;TRINITY_DN944_c0_g2;TRINITY_DN906_c2_g1;TRINITY_DN1216_c0_g1;TRINITY_DN1216_c0_g2;TRINITY_DN1558_c0_g1;TRINITY_DN1558_c0_g2;TRINITY_DN1550_c0_g1;TRINITY_DN1823_c0_g1;TRINITY_DN1823_c0_g2;TRINITY_DN1835_c0_g1;TRINITY_DN218…
Glycosylphosphatidylinositol (GPI)-anchored proteins	Protein families: signaling and cellular processes	Brite Hierarchies	39	K01077;K01513;K06542;K01296;K01049;K06499;K16659;K01365;K03901;K06751;K06846;K04008;K00775;K01273;K18246;K06469;K08107;K03985;K06514;K01197;K06491;K01059;K13649;K18274;K06760;K06479;K06717;K01194;K18152;K08108;K08111;K06716;K08664;K08110;K08743;K04391;K06759;K14208;K05059	121	TRINITY_DN794_c0_g1;TRINITY_DN1189_c3_g1;TRINITY_DN1372_c2_g1;TRINITY_DN1306_c1_g1;TRINITY_DN1567_c0_g1;TRINITY_DN1858_c0_g1;TRINITY_DN1858_c3_g1;TRINITY_DN1858_c6_g1;TRINITY_DN1821_c0_g1;TRINITY_DN2177_c0_g2;TRINITY_DN2227_c1_g1;TRINITY_DN2249_c0_g1;TRINITY_DN2316_c0_g2;TRINITY_DN2396_c14_g1;TRINITY_DN2543_c0_g2;TRINITY_DN2634_c0_g3;TRINITY_DN2671_c1_g1;TRINITY_DN2657_c0_g1;TRINITY_DN2773_c1_g1;…
Arrhythmogenic right ventricular cardiomyopathy (ARVC)	Cardiovascular diseases	Human Diseases	56	K10381;K12641;K06583;K10366;K06485;K06588;K06484;K02620;K04491;K07610;K07597;K06736;K06493;K06481;K06265;K04859;K06589;K06487;K04851;K04872;K12642;K05692;K12566;K06586;K06480;K06483;K05719;K04962;K12565;K06525;K04863;K04860;K04858;K04850;K06476;K07601;K10056;K06590;K04864;K04869;K05691;K12564;K04853;K06591;K04865;K04490;K04492;K07372;K12569;K04861;K06584;K04862;K04867;K04871;K04873;K04857	120	TRINITY_DN39_c1_g2;TRINITY_DN74_c0_g1;TRINITY_DN67_c0_g1;TRINITY_DN205_c2_g1;TRINITY_DN264_c1_g1;TRINITY_DN316_c2_g3;TRINITY_DN459_c0_g1;TRINITY_DN876_c1_g1;TRINITY_DN895_c0_g1;TRINITY_DN1103_c0_g1;TRINITY_DN1563_c2_g1;TRINITY_DN1670_c2_g1;TRINITY_DN1812_c2_g2;TRINITY_DN1812_c2_g1;TRINITY_DN1814_c0_g1;TRINITY_DN1947_c0_g1;TRINITY_DN2024_c2_g1;TRINITY_DN2621_c0_g1;TRINITY_DN3030_c0_g1;TRINITY_DN32…
Pyruvate metabolism	Carbohydrate metabolism	Metabolism	42	K00128;K00162;K01895;K01946;K00627;K00382;K13997;K01512;K00016;K00161;K01596;K00626;K00873;K00049;K01958;K00025;K00026;K14085;K00029;K01759;K11262;K00149;K12406;K12972;K00027;K01069;K01679;K05523;K00101;K00090;K01067;K00116;K01649;K01676;K01963;K04073;K00024;K01595;K00247;K01610;K01962;K00138	120	TRINITY_DN47_c0_g1;TRINITY_DN8_c0_g1;TRINITY_DN116_c0_g1;TRINITY_DN116_c0_g3;TRINITY_DN436_c0_g2;TRINITY_DN1295_c2_g2;TRINITY_DN1476_c7_g1;TRINITY_DN1498_c0_g1;TRINITY_DN1540_c1_g1;TRINITY_DN1607_c2_g1;TRINITY_DN1681_c1_g1;TRINITY_DN1751_c0_g1;TRINITY_DN1974_c0_g2;TRINITY_DN1905_c0_g1;TRINITY_DN1905_c2_g2;TRINITY_DN2289_c0_g1;TRINITY_DN2439_c1_g1;TRINITY_DN2945_c0_g1;TRINITY_DN3306_c0_g1;TRINITY_…
Drug metabolism - cytochrome P450	Xenobiotics biodegradation and metabolism	Metabolism	10	K00799;K00157;K00274;K00485;K13299;K00699;K00129;K13951;K00121;K07415	119	TRINITY_DN243_c0_g1;TRINITY_DN287_c4_g1;TRINITY_DN668_c1_g1;TRINITY_DN1450_c1_g1;TRINITY_DN1609_c0_g1;TRINITY_DN2014_c0_g1;TRINITY_DN2098_c4_g1;TRINITY_DN2098_c1_g3;TRINITY_DN2098_c1_g1;TRINITY_DN2226_c9_g1;TRINITY_DN2245_c0_g1;TRINITY_DN2245_c0_g2;TRINITY_DN2314_c0_g1;TRINITY_DN3147_c0_g1;TRINITY_DN3147_c0_g3;TRINITY_DN3577_c0_g1;TRINITY_DN3577_c0_g2;TRINITY_DN3638_c2_g2;TRINITY_DN3638_c2_g3;TRI…
Bile secretion	Digestive system	Organismal Systems	50	K12473;K05742;K01539;K01540;K08046;K08045;K13885;K13855;K05673;K12040;K05681;K08044;K03460;K01538;K07299;K14341;K05658;K01253;K08042;K05666;K14360;K14158;K13575;K09864;K04943;K09877;K04345;K05031;K04588;K05667;K05659;K00021;K08041;K04632;K08043;K08563;K09866;K14361;K08748;K05683;K08049;K08198;K13857;K08537;K14349;K05664;K08204;K08048;K18245;K08205	119	TRINITY_DN192_c2_g1;TRINITY_DN157_c0_g1;TRINITY_DN271_c0_g1;TRINITY_DN271_c0_g3;TRINITY_DN914_c1_g1;TRINITY_DN956_c1_g1;TRINITY_DN1003_c1_g1;TRINITY_DN1093_c2_g1;TRINITY_DN1170_c0_g1;TRINITY_DN1115_c0_g2;TRINITY_DN1382_c2_g1;TRINITY_DN1345_c1_g2;TRINITY_DN1384_c0_g1;TRINITY_DN1481_c0_g1;TRINITY_DN1701_c0_g1;TRINITY_DN2148_c5_g1;TRINITY_DN2316_c0_g3;TRINITY_DN2666_c1_g1;TRINITY_DN2784_c0_g1;TRINIT…
Cortisol synthesis and secretion	Endocrine system	Organismal Systems	46	K04635;K04634;K12473;K04960;K04855;K04914;K08046;K08045;K13885;K04854;K00513;K16931;K09048;K08044;K04465;K08562;K04959;K08560;K18437;K04684;K05858;K04851;K04958;K09355;K00497;K04913;K08042;K05870;K04345;K04450;K04850;K16056;K04374;K00070;K09047;K08041;K00498;K04632;K08043;K08049;K04853;K04856;K14349;K04166;K08048;K04857	119	TRINITY_DN22_c0_g1;TRINITY_DN22_c0_g3;TRINITY_DN192_c2_g1;TRINITY_DN296_c3_g1;TRINITY_DN485_c1_g1;TRINITY_DN455_c0_g1;TRINITY_DN739_c0_g5;TRINITY_DN956_c1_g1;TRINITY_DN1003_c1_g1;TRINITY_DN1093_c2_g1;TRINITY_DN1156_c3_g1;TRINITY_DN1131_c0_g1;TRINITY_DN1345_c2_g1;TRINITY_DN1322_c0_g1;TRINITY_DN1322_c0_g2;TRINITY_DN1481_c0_g1;TRINITY_DN1590_c0_g2;TRINITY_DN1778_c0_g1;TRINITY_DN1781_c1_g1;TRINITY_DN…
Glycerolipid metabolism	Lipid metabolism	Metabolism	34	K00128;K13523;K15728;K00901;K13509;K11155;K16816;K00002;K13506;K00011;K01080;K00629;K01054;K09881;K14085;K11160;K00864;K00863;K13534;K00149;K01046;K01059;K19007;K14457;K14073;K14074;K13517;K00631;K03621;K14075;K00005;K13513;K12298;K14452	117	TRINITY_DN47_c0_g1;TRINITY_DN147_c1_g1;TRINITY_DN197_c1_g1;TRINITY_DN217_c1_g1;TRINITY_DN414_c0_g3;TRINITY_DN547_c0_g1;TRINITY_DN959_c0_g1;TRINITY_DN1139_c0_g1;TRINITY_DN1174_c1_g1;TRINITY_DN1374_c0_g2;TRINITY_DN1686_c0_g1;TRINITY_DN1735_c2_g1;TRINITY_DN2355_c1_g1;TRINITY_DN2446_c0_g1;TRINITY_DN2571_c0_g1;TRINITY_DN2601_c0_g1;TRINITY_DN3262_c0_g1;TRINITY_DN3346_c0_g2;TRINITY_DN3431_c1_g1;TRINITY_…
Glutathione metabolism	Metabolism of other amino acids	Metabolism	27	K01920;K00799;K01469;K18592;K00432;K11142;K05360;K00036;K11140;K11205;K13299;K00033;K10808;K05361;K07232;K00383;K01581;K11204;K00682;K00031;K00797;K10807;K00681;K00802;K01255;K01919;K07751	116	TRINITY_DN171_c0_g1;TRINITY_DN243_c0_g1;TRINITY_DN287_c4_g1;TRINITY_DN566_c0_g2;TRINITY_DN541_c0_g1;TRINITY_DN766_c1_g1;TRINITY_DN954_c0_g2;TRINITY_DN1116_c6_g1;TRINITY_DN1287_c1_g2;TRINITY_DN1450_c1_g1;TRINITY_DN2036_c0_g1;TRINITY_DN2048_c1_g1;TRINITY_DN2098_c4_g1;TRINITY_DN2098_c1_g3;TRINITY_DN2098_c1_g1;TRINITY_DN2226_c9_g1;TRINITY_DN2245_c0_g1;TRINITY_DN2245_c0_g2;TRINITY_DN2314_c0_g1;TRINITY…
Apoptosis - fly	Cell growth and death	Cellular Processes	37	K07611;K04404;K09428;K04426;K06030;K03386;K04727;K04427;K02561;K03262;K04431;K04725;K04440;K08791;K08738;K07827;K01527;K04412;K10586;K10798;K06640;K04397;K04365;K04398;K02084;K17065;K04371;K07870;K04728;K16686;K08860;K05770;K04374;K03175;K04361;K10149;K09848	116	TRINITY_DN74_c0_g2;TRINITY_DN74_c0_g3;TRINITY_DN100_c0_g1;TRINITY_DN361_c0_g1;TRINITY_DN611_c4_g1;TRINITY_DN782_c3_g1;TRINITY_DN833_c1_g1;TRINITY_DN908_c2_g1;TRINITY_DN982_c1_g1;TRINITY_DN1022_c0_g1;TRINITY_DN1077_c0_g1;TRINITY_DN1065_c1_g1;TRINITY_DN1015_c1_g1;TRINITY_DN1149_c1_g1;TRINITY_DN1112_c1_g1;TRINITY_DN1558_c0_g1;TRINITY_DN1558_c0_g2;TRINITY_DN1691_c0_g1;TRINITY_DN1933_c0_g2;TRINITY_DN2…
Adipocytokine signaling pathway	Endocrine system	Organismal Systems	44	K07187;K05062;K08765;K07298;K01946;K19523;K07209;K04456;K07296;K01897;K07293;K07297;K19524;K04440;K07191;K04734;K02580;K03173;K07210;K01596;K05141;K07359;K04696;K05872;K16172;K07299;K07199;K01084;K04692;K07198;K02581;K04467;K03158;K15013;K07203;K04735;K07294;K18052;K07202;K04447;K06259;K05231;K05424;K07200	115	TRINITY_DN70_c0_g2;TRINITY_DN13_c0_g1;TRINITY_DN123_c0_g1;TRINITY_DN452_c0_g1;TRINITY_DN436_c0_g2;TRINITY_DN824_c0_g1;TRINITY_DN842_c0_g1;TRINITY_DN944_c0_g1;TRINITY_DN944_c0_g2;TRINITY_DN1070_c2_g3;TRINITY_DN1138_c1_g1;TRINITY_DN1197_c0_g1;TRINITY_DN1205_c2_g1;TRINITY_DN1375_c1_g1;TRINITY_DN1476_c7_g1;TRINITY_DN1482_c0_g1;TRINITY_DN1558_c0_g1;TRINITY_DN1558_c0_g2;TRINITY_DN1582_c0_g1;TRINITY_DN1…
Retinol metabolism	Metabolism of cofactors and vitamins	Metabolism	26	K11151;K11155;K00157;K11146;K09516;K07249;K11154;K00699;K13951;K12664;K07420;K07424;K07412;K11152;K07413;K00121;K11149;K11147;K00061;K07425;K00678;K07411;K07437;K12665;K15734;K11153	115	TRINITY_DN21_c0_g2;TRINITY_DN547_c0_g1;TRINITY_DN668_c1_g1;TRINITY_DN1640_c0_g1;TRINITY_DN2011_c5_g1;TRINITY_DN2393_c0_g1;TRINITY_DN2305_c0_g1;TRINITY_DN3376_c7_g1;TRINITY_DN3427_c1_g1;TRINITY_DN3427_c0_g1;TRINITY_DN3693_c4_g1;TRINITY_DN3785_c4_g1;TRINITY_DN3873_c0_g2;TRINITY_DN4540_c5_g1;TRINITY_DN4540_c0_g1;TRINITY_DN4540_c0_g2;TRINITY_DN4768_c8_g1;TRINITY_DN5073_c2_g1;TRINITY_DN5139_c0_g1;TRIN…
Fc epsilon RI signaling pathway	Immune system	Organismal Systems	37	K00922;K03084;K02833;K07861;K04441;K05854;K04366;K03099;K06276;K04456;K04431;K07362;K08091;K04368;K04369;K04392;K04440;K00461;K16342;K07827;K05730;K02649;K01116;K04432;K04371;K07370;K05703;K04364;K07860;K02677;K05855;K04430;K05859;K04433;K05427;K08089;K07361	115	TRINITY_DN152_c0_g2;TRINITY_DN249_c0_g1;TRINITY_DN203_c0_g3;TRINITY_DN367_c0_g1;TRINITY_DN538_c1_g1;TRINITY_DN572_c1_g1;TRINITY_DN619_c0_g1;TRINITY_DN632_c0_g1;TRINITY_DN779_c2_g1;TRINITY_DN944_c0_g1;TRINITY_DN944_c0_g2;TRINITY_DN906_c2_g1;TRINITY_DN1149_c1_g1;TRINITY_DN1202_c0_g1;TRINITY_DN1283_c1_g1;TRINITY_DN1216_c0_g1;TRINITY_DN1216_c0_g2;TRINITY_DN1451_c0_g1;TRINITY_DN1451_c0_g2;TRINITY_DN15…
Meiosis - yeast	Cell growth and death	Cellular Processes	40	K06669;K11584;K04382;K03351;K03353;K03352;K03348;K03456;K02830;K06639;K02603;K02605;K02210;K02606;K06269;K03349;K06636;K03354;K03355;K02542;K06671;K02365;K02540;K02604;K03363;K02213;K04345;K02209;K02214;K03350;K02212;K06628;K02541;K02537;K06662;K02178;K02607;K03358;K02608;K02216	114	TRINITY_DN31_c0_g1;TRINITY_DN202_c1_g1;TRINITY_DN202_c0_g1;TRINITY_DN387_c2_g1;TRINITY_DN367_c3_g1;TRINITY_DN434_c1_g1;TRINITY_DN684_c0_g1;TRINITY_DN788_c1_g3;TRINITY_DN788_c1_g1;TRINITY_DN843_c3_g2;TRINITY_DN999_c0_g2;TRINITY_DN1193_c1_g1;TRINITY_DN1136_c0_g1;TRINITY_DN1136_c0_g2;TRINITY_DN1254_c0_g1;TRINITY_DN1243_c0_g1;TRINITY_DN1260_c0_g4;TRINITY_DN1260_c0_g1;TRINITY_DN1260_c0_g3;TRINITY_DN12…
Fatty acid degradation	Lipid metabolism	Metabolism	33	K00128;K08765;K00232;K19523;K07515;K01897;K19524;K00248;K00022;K07509;K07513;K13239;K00626;K07514;K00249;K14085;K07511;K13951;K07508;K08766;K15013;K00149;K00255;K00121;K09478;K09479;K07425;K00529;K01782;K05939;K00632;K01825;K18857	113	TRINITY_DN47_c0_g1;TRINITY_DN123_c0_g1;TRINITY_DN322_c7_g2;TRINITY_DN824_c0_g1;TRINITY_DN985_c2_g1;TRINITY_DN1138_c1_g1;TRINITY_DN1390_c1_g1;TRINITY_DN1375_c1_g1;TRINITY_DN1482_c0_g1;TRINITY_DN1613_c0_g1;TRINITY_DN1691_c3_g1;TRINITY_DN1691_c3_g2;TRINITY_DN1834_c1_g1;TRINITY_DN1905_c2_g1;TRINITY_DN2085_c0_g1;TRINITY_DN2173_c1_g1;TRINITY_DN2289_c0_g1;TRINITY_DN2583_c0_g2;TRINITY_DN2776_c0_g1;TRINIT…
Non-small cell lung cancer	Cancers: Specific types	Human Diseases	50	K00922;K02833;K10140;K11224;K06625;K04366;K03099;K06276;K04456;K02089;K04368;K04369;K08774;K03511;K08528;K04402;K11218;K09850;K07827;K04411;K02649;K01116;K09408;K15420;K05083;K04365;K04451;K02158;K06621;K04371;K04692;K04357;K04503;K14021;K02091;K08015;K04364;K17454;K05119;K02677;K09389;K11223;K06620;K19663;K06618;K01522;K02159;K05859;K04361;K19662	113	TRINITY_DN152_c0_g2;TRINITY_DN203_c0_g3;TRINITY_DN346_c1_g1;TRINITY_DN583_c0_g1;TRINITY_DN543_c0_g2;TRINITY_DN619_c0_g1;TRINITY_DN632_c0_g1;TRINITY_DN779_c2_g1;TRINITY_DN944_c0_g1;TRINITY_DN944_c0_g2;TRINITY_DN906_c2_g1;TRINITY_DN1268_c0_g1;TRINITY_DN1216_c0_g1;TRINITY_DN1216_c0_g2;TRINITY_DN1204_c6_g1;TRINITY_DN1552_c1_g1;TRINITY_DN1769_c0_g2;TRINITY_DN1716_c0_g1;TRINITY_DN1704_c0_g1;TRINITY_DN1…
B cell receptor signaling pathway	Immune system	Organismal Systems	48	K00922;K03084;K02833;K07861;K05854;K04366;K03099;K07209;K04456;K04446;K04368;K04369;K04348;K04392;K15909;K04734;K02580;K07210;K07827;K05730;K02649;K07368;K05872;K12230;K05697;K04371;K02581;K12560;K06268;K04467;K07370;K04364;K07860;K12229;K04735;K07369;K06507;K06465;K07371;K05855;K05859;K03083;K07367;K12362;K04379;K17333;K06467;K19662	113	TRINITY_DN152_c0_g2;TRINITY_DN249_c0_g1;TRINITY_DN203_c0_g3;TRINITY_DN367_c0_g1;TRINITY_DN572_c1_g1;TRINITY_DN619_c0_g1;TRINITY_DN632_c0_g1;TRINITY_DN842_c0_g1;TRINITY_DN944_c0_g1;TRINITY_DN944_c0_g2;TRINITY_DN906_c2_g1;TRINITY_DN1222_c1_g1;TRINITY_DN1216_c0_g1;TRINITY_DN1216_c0_g2;TRINITY_DN1311_c0_g1;TRINITY_DN1451_c0_g1;TRINITY_DN1451_c0_g2;TRINITY_DN1401_c0_g1;TRINITY_DN1724_c0_g1;TRINITY_DN1…
GABAergic synapse	Nervous system	Organismal Systems	53	K04542;K04615;K04630;K08046;K08045;K08044;K04536;K13576;K01425;K04344;K01580;K04849;K04549;K14207;K08341;K04534;K04851;K04538;K04647;K05704;K05034;K07826;K08042;K04345;K04539;K04545;K02677;K04850;K14992;K05184;K15374;K19663;K08041;K07825;K04537;K08043;K04541;K05186;K05181;K05175;K15375;K08049;K04853;K04543;K14990;K05189;K05190;K08048;K15376;K13524;K04544;K04857;K19662	112	TRINITY_DN43_c0_g2;TRINITY_DN48_c1_g1;TRINITY_DN653_c0_g2;TRINITY_DN956_c1_g1;TRINITY_DN1003_c1_g1;TRINITY_DN1481_c0_g1;TRINITY_DN1714_c1_g3;TRINITY_DN1714_c1_g1;TRINITY_DN1819_c0_g2;TRINITY_DN1819_c0_g1;TRINITY_DN2161_c6_g1;TRINITY_DN2273_c1_g1;TRINITY_DN2397_c0_g1;TRINITY_DN2439_c0_g2;TRINITY_DN2675_c0_g1;TRINITY_DN2930_c1_g1;TRINITY_DN2948_c0_g1;TRINITY_DN3042_c0_g1;TRINITY_DN3270_c0_g1;TRINIT…
Protein digestion and absorption	Digestive system	Organismal Systems	48	K01278;K06823;K19721;K01539;K06236;K05849;K06238;K01540;K06237;K06519;K08187;K12040;K08132;K16628;K04945;K14211;K05612;K01538;K14207;K01285;K13781;K04916;K04897;K13867;K19720;K01346;K16630;K14210;K08135;K14206;K07603;K01389;K04926;K08780;K09708;K05006;K08779;K08131;K05616;K19719;K01312;K01345;K01395;K13868;K06002;K05334;K14208;K01291	112	TRINITY_DN11_c1_g1;TRINITY_DN184_c1_g1;TRINITY_DN172_c1_g2;TRINITY_DN271_c0_g1;TRINITY_DN271_c0_g3;TRINITY_DN578_c0_g1;TRINITY_DN665_c6_g1;TRINITY_DN821_c0_g1;TRINITY_DN914_c1_g1;TRINITY_DN921_c0_g2;TRINITY_DN1080_c2_g1;TRINITY_DN1205_c5_g1;TRINITY_DN1382_c2_g1;TRINITY_DN1384_c0_g1;TRINITY_DN1420_c0_g2;TRINITY_DN1539_c2_g2;TRINITY_DN1539_c4_g1;TRINITY_DN1539_c2_g1;TRINITY_DN1786_c1_g1;TRINITY_DN1…
Nucleotide excision repair	Replication and repair	Genetic Information Processing	41	K10140;K02324;K10841;K10849;K04802;K10840;K10754;K02327;K10747;K10843;K10609;K10610;K03143;K10839;K07466;K10756;K10846;K03142;K03141;K10844;K10755;K02202;K03868;K02328;K10845;K10848;K10570;K10847;K10838;K02325;K02326;K10842;K01972;K03702;K10740;K10739;K03506;K06634;K03144;K03703;K03505	112	TRINITY_DN346_c1_g1;TRINITY_DN326_c0_g1;TRINITY_DN402_c1_g1;TRINITY_DN730_c0_g1;TRINITY_DN795_c0_g1;TRINITY_DN910_c0_g1;TRINITY_DN1145_c0_g1;TRINITY_DN1127_c0_g1;TRINITY_DN1709_c0_g1;TRINITY_DN1851_c0_g1;TRINITY_DN1885_c0_g1;TRINITY_DN1836_c1_g3;TRINITY_DN1931_c0_g1;TRINITY_DN2017_c5_g1;TRINITY_DN2169_c0_g1;TRINITY_DN2168_c1_g1;TRINITY_DN2181_c1_g1;TRINITY_DN2251_c1_g3;TRINITY_DN2251_c1_g2;TRINIT…
Synaptic vesicle cycle	Nervous system	Organismal Systems	35	K01528;K15291;K11825;K15296;K02149;K02154;K11824;K03661;K02147;K15292;K15293;K02148;K02144;K04344;K02145;K04849;K04646;K11827;K11826;K04560;K08486;K02150;K07882;K04644;K02146;K02155;K02153;K15290;K02151;K02152;K04645;K12302;K08155;K15295;K18211	112	TRINITY_DN122_c1_g1;TRINITY_DN151_c2_g3;TRINITY_DN339_c1_g1;TRINITY_DN447_c0_g1;TRINITY_DN447_c0_g2;TRINITY_DN550_c0_g1;TRINITY_DN784_c0_g1;TRINITY_DN725_c1_g1;TRINITY_DN775_c0_g1;TRINITY_DN775_c0_g2;TRINITY_DN775_c0_g3;TRINITY_DN919_c0_g1;TRINITY_DN1043_c0_g1;TRINITY_DN1125_c1_g1;TRINITY_DN1213_c2_g1;TRINITY_DN1235_c6_g1;TRINITY_DN1393_c0_g1;TRINITY_DN1723_c0_g1;TRINITY_DN1723_c0_g2;TRINITY_DN18…
Vibrio cholerae infection	Infectious diseases: Bacterial	Human Diseases	34	K02149;K02154;K05701;K03661;K02147;K07937;K09582;K10950;K02148;K02144;K03662;K01116;K10949;K02145;K10951;K07342;K02150;K05692;K10956;K06098;K02146;K04345;K05031;K02677;K02155;K02153;K04632;K05859;K08043;K02151;K04926;K02152;K08049;K09481	111	TRINITY_DN784_c0_g1;TRINITY_DN775_c0_g1;TRINITY_DN775_c0_g2;TRINITY_DN775_c0_g3;TRINITY_DN978_c0_g2;TRINITY_DN1043_c0_g1;TRINITY_DN1125_c1_g1;TRINITY_DN1235_c6_g1;TRINITY_DN1273_c6_g1;TRINITY_DN1330_c0_g2;TRINITY_DN1351_c0_g1;TRINITY_DN1351_c0_g2;TRINITY_DN1661_c1_g1;TRINITY_DN1723_c0_g1;TRINITY_DN1723_c0_g2;TRINITY_DN1884_c1_g1;TRINITY_DN2185_c4_g1;TRINITY_DN2205_c3_g1;TRINITY_DN2356_c0_g1;TRINI…
Cholesterol metabolism	Digestive system	Organismal Systems	33	K04550;K12473;K04524;K08767;K05641;K08761;K10637;K13885;K15041;K16931;K12474;K00637;K06233;K15040;K16835;K12388;K06096;K08757;K12385;K10707;K08760;K00488;K01059;K05770;K14462;K13443;K08758;K05862;K13050;K05683;K06259;K14349;K05664	111	TRINITY_DN98_c1_g1;TRINITY_DN192_c2_g1;TRINITY_DN132_c0_g2;TRINITY_DN235_c1_g1;TRINITY_DN372_c2_g1;TRINITY_DN410_c0_g1;TRINITY_DN410_c0_g2;TRINITY_DN650_c0_g1;TRINITY_DN1093_c2_g1;TRINITY_DN1288_c4_g1;TRINITY_DN1311_c1_g1;TRINITY_DN1345_c2_g1;TRINITY_DN1568_c2_g2;TRINITY_DN1527_c1_g1;TRINITY_DN1653_c0_g1;TRINITY_DN1653_c0_g2;TRINITY_DN1880_c2_g1;TRINITY_DN1925_c1_g1;TRINITY_DN1928_c2_g1;TRINITY_D…
Ovarian steroidogenesis	Endocrine system	Organismal Systems	31	K12473;K04527;K13373;K07418;K07434;K08046;K08045;K13885;K16931;K08044;K00461;K16342;K04248;K00044;K13368;K05459;K07410;K08042;K04345;K05498;K11987;K16620;K00070;K08041;K00498;K04632;K08043;K08049;K05087;K04247;K08048	110	TRINITY_DN192_c2_g1;TRINITY_DN164_c1_g1;TRINITY_DN402_c0_g1;TRINITY_DN663_c6_g1;TRINITY_DN636_c1_g2;TRINITY_DN636_c1_g1;TRINITY_DN783_c2_g1;TRINITY_DN956_c1_g1;TRINITY_DN1003_c1_g1;TRINITY_DN1093_c2_g1;TRINITY_DN1215_c4_g1;TRINITY_DN1215_c1_g1;TRINITY_DN1215_c0_g1;TRINITY_DN1345_c2_g1;TRINITY_DN1481_c0_g1;TRINITY_DN1737_c2_g1;TRINITY_DN2057_c1_g1;TRINITY_DN2235_c1_g1;TRINITY_DN2642_c3_g1;TRINITY_…
Cytokine receptors	Protein families: signaling and cellular processes	Brite Hierarchies	86	K04737;K05062;K05066;K04738;K04185;K04722;K05130;K04182;K03159;K05060;K05079;K05164;K05156;K05144;K05055;K05141;K05140;K05070;K05068;K05169;K08417;K05133;K05081;K04186;K04390;K05163;K05058;K05147;K05061;K05076;K05158;K05074;K05080;K05057;K05161;K05132;K04387;K05071;K04304;K05160;K05166;K03158;K05153;K05131;K05172;K08373;K05157;K04177;K04191;K06574;K05168;K05064;K05137;K05142;K04176;K19598;K04188;…	110	TRINITY_DN54_c0_g1;TRINITY_DN13_c0_g1;TRINITY_DN138_c0_g1;TRINITY_DN364_c0_g1;TRINITY_DN365_c0_g2;TRINITY_DN455_c2_g1;TRINITY_DN725_c0_g1;TRINITY_DN949_c1_g1;TRINITY_DN1108_c0_g1;TRINITY_DN1275_c0_g1;TRINITY_DN1275_c0_g2;TRINITY_DN1275_c0_g3;TRINITY_DN1666_c1_g1;TRINITY_DN1874_c0_g2;TRINITY_DN1874_c0_g1;TRINITY_DN1921_c1_g2;TRINITY_DN2044_c0_g1;TRINITY_DN2011_c1_g2;TRINITY_DN2139_c1_g1;TRINITY_DN…
Gastric acid secretion	Digestive system	Organismal Systems	40	K04634;K05742;K04960;K01539;K04630;K01540;K08046;K08045;K13855;K08044;K04959;K04515;K00907;K13961;K05858;K04958;K04913;K08042;K04345;K05031;K01542;K02677;K08007;K04195;K04150;K19663;K08041;K04131;K04632;K08043;K02183;K04926;K08049;K13962;K04218;K05003;K08048;K18245;K01543;K19662	108	TRINITY_DN22_c0_g3;TRINITY_DN157_c0_g1;TRINITY_DN296_c3_g1;TRINITY_DN271_c0_g1;TRINITY_DN271_c0_g3;TRINITY_DN485_c1_g1;TRINITY_DN653_c0_g2;TRINITY_DN914_c1_g1;TRINITY_DN956_c1_g1;TRINITY_DN1003_c1_g1;TRINITY_DN1170_c0_g1;TRINITY_DN1384_c0_g1;TRINITY_DN1481_c0_g1;TRINITY_DN1973_c0_g1;TRINITY_DN1973_c0_g2;TRINITY_DN2197_c0_g2;TRINITY_DN2148_c5_g1;TRINITY_DN2325_c0_g1;TRINITY_DN2316_c0_g3;TRINITY_DN…
RIG-I-like receptor signaling pathway	Immune system	Organismal Systems	44	K05411;K12646;K12656;K04416;K04441;K12648;K07209;K12170;K04427;K05410;K12655;K12652;K07211;K12649;K02373;K11594;K04440;K12651;K04734;K02580;K03173;K07210;K12653;K08601;K10652;K04398;K08339;K03174;K12654;K08336;K02581;K02861;K04467;K05414;K12671;K05442;K00863;K04735;K09578;K03175;K12647;K05406;K12159;K05441	108	TRINITY_DN15_c0_g1;TRINITY_DN45_c0_g1;TRINITY_DN75_c2_g1;TRINITY_DN333_c0_g1;TRINITY_DN538_c1_g1;TRINITY_DN675_c0_g1;TRINITY_DN798_c5_g1;TRINITY_DN842_c0_g1;TRINITY_DN958_c0_g2;TRINITY_DN1077_c0_g1;TRINITY_DN1049_c0_g1;TRINITY_DN1081_c0_g1;TRINITY_DN1137_c0_g1;TRINITY_DN1120_c0_g1;TRINITY_DN1120_c0_g2;TRINITY_DN1211_c0_g1;TRINITY_DN1204_c1_g1;TRINITY_DN1351_c3_g1;TRINITY_DN1579_c0_g1;TRINITY_DN15…
p53 signaling pathway	Cell growth and death	Cellular Processes	58	K10138;K10140;K06625;K07207;K16857;K04726;K02187;K02089;K04506;K10134;K06509;K03982;K02206;K01110;K04402;K10130;K08738;K06626;K04570;K02161;K10143;K10127;K06640;K10141;K10152;K10151;K04390;K04451;K10808;K06621;K04398;K02084;K10146;K05459;K10142;K10136;K04728;K04503;K06641;K10144;K10145;K02091;K10137;K10131;K04596;K10132;K10147;K10129;K05868;K10133;K10135;K02159;K10148;K02087;K02216;K06643;K10139;…	107	TRINITY_DN352_c4_g1;TRINITY_DN346_c1_g1;TRINITY_DN543_c0_g2;TRINITY_DN802_c0_g1;TRINITY_DN1044_c0_g1;TRINITY_DN1148_c3_g1;TRINITY_DN1155_c1_g1;TRINITY_DN1268_c0_g1;TRINITY_DN1287_c0_g2;TRINITY_DN1355_c1_g2;TRINITY_DN1355_c1_g1;TRINITY_DN1488_c1_g1;TRINITY_DN1537_c0_g3;TRINITY_DN1619_c0_g1;TRINITY_DN1777_c3_g5;TRINITY_DN1716_c0_g1;TRINITY_DN1783_c0_g1;TRINITY_DN1933_c0_g2;TRINITY_DN2052_c0_g1;TRIN…
Legionellosis	Infectious diseases: Bacterial	Human Diseases	38	K10168;K15485;K03231;K07875;K07874;K12805;K12807;K05482;K03990;K02187;K07937;K15464;K04734;K02580;K04469;K08738;K04077;K07953;K03233;K04397;K12799;K04398;K03283;K02084;K05505;K05405;K01370;K14416;K06464;K04735;K10160;K13525;K09414;K05406;K03596;K08517;K04391;K00239	106	TRINITY_DN118_c1_g1;TRINITY_DN121_c3_g1;TRINITY_DN258_c2_g1;TRINITY_DN200_c1_g2;TRINITY_DN200_c1_g1;TRINITY_DN538_c1_g2;TRINITY_DN613_c0_g1;TRINITY_DN613_c0_g3;TRINITY_DN770_c0_g1;TRINITY_DN986_c0_g1;TRINITY_DN986_c0_g3;TRINITY_DN1155_c1_g1;TRINITY_DN1273_c6_g1;TRINITY_DN1351_c0_g1;TRINITY_DN1351_c0_g2;TRINITY_DN1771_c0_g1;TRINITY_DN1724_c0_g1;TRINITY_DN1823_c0_g1;TRINITY_DN1823_c0_g2;TRINITY_DN1…
Viral myocarditis	Cardiovascular diseases	Human Diseases	30	K10366;K07861;K04726;K02187;K04392;K06752;K06788;K06265;K03260;K08738;K06619;K06751;K17751;K04398;K05692;K08887;K12566;K04503;K05413;K05703;K07860;K12565;K06464;K06470;K06490;K12564;K03160;K05412;K06278;K03161	106	TRINITY_DN205_c2_g1;TRINITY_DN367_c0_g1;TRINITY_DN1148_c3_g1;TRINITY_DN1155_c1_g1;TRINITY_DN1451_c0_g1;TRINITY_DN1451_c0_g2;TRINITY_DN1606_c0_g2;TRINITY_DN1843_c0_g1;TRINITY_DN1947_c0_g1;TRINITY_DN1963_c1_g1;TRINITY_DN1933_c0_g2;TRINITY_DN2045_c4_g1;TRINITY_DN2366_c2_g1;TRINITY_DN2396_c14_g1;TRINITY_DN2543_c0_g2;TRINITY_DN2786_c0_g1;TRINITY_DN2773_c1_g1;TRINITY_DN2773_c0_g1;TRINITY_DN2773_c0_g2;T…
Notch signaling pathway	Signal transduction	Environmental Information Processing	23	K04498;K06061;K06172;K06062;K06067;K06053;K04505;K02353;K06065;K06063;K06058;K02599;K06057;K06066;K06052;K06059;K06171;K06051;K05948;K04522;K04496;K06054;K06056	106	TRINITY_DN165_c1_g2;TRINITY_DN165_c1_g1;TRINITY_DN252_c0_g2;TRINITY_DN233_c0_g1;TRINITY_DN307_c2_g1;TRINITY_DN477_c1_g2;TRINITY_DN494_c2_g2;TRINITY_DN562_c1_g2;TRINITY_DN665_c1_g1;TRINITY_DN880_c1_g1;TRINITY_DN1094_c0_g1;TRINITY_DN1328_c11_g1;TRINITY_DN1398_c0_g1;TRINITY_DN1378_c0_g1;TRINITY_DN1499_c0_g1;TRINITY_DN1499_c0_g2;TRINITY_DN1690_c0_g1;TRINITY_DN1656_c4_g1;TRINITY_DN1623_c2_g1;TRINITY_D…
Structural proteins	Unclassified: signaling and cellular processes	Not Included in Pathway or Brite	54	K17932;K17355;K17928;K19530;K08870;K11064;K17352;K15636;K17926;K17935;K19527;K19525;K17921;K19526;K17338;K07625;K19323;K17941;K17927;K07615;K17341;K19407;K12359;K19289;K01446;K17356;K17350;K17353;K17083;K17931;K17925;K17359;K17340;K15539;K07623;K17342;K07624;K18241;K17929;K07627;K17354;K07285;K05230;K17922;K19467;K12360;K01993;K13785;K02197;K03634;K17930;K07286;K19331;K17351	106	TRINITY_DN267_c2_g1;TRINITY_DN307_c3_g1;TRINITY_DN538_c0_g1;TRINITY_DN1067_c0_g1;TRINITY_DN1289_c0_g1;TRINITY_DN1283_c3_g2;TRINITY_DN1283_c2_g1;TRINITY_DN1854_c0_g1;TRINITY_DN1822_c0_g2;TRINITY_DN1932_c0_g2;TRINITY_DN1932_c0_g3;TRINITY_DN2009_c0_g1;TRINITY_DN2271_c0_g1;TRINITY_DN2582_c0_g1;TRINITY_DN2598_c2_g3;TRINITY_DN2598_c2_g1;TRINITY_DN2719_c0_g1;TRINITY_DN2711_c0_g1;TRINITY_DN2888_c0_g1;TRI…
Arginine and proline metabolism	Amino acid metabolism	Metabolism	42	K00128;K00286;K00318;K12259;K00542;K14455;K01476;K11142;K14454;K08660;K00613;K14755;K00819;K00274;K00657;K00472;K18123;K01611;K12657;K00933;K11182;K14085;K01581;K13241;K00149;K00797;K00137;K00802;K00840;K13240;K05526;K00673;K06447;K01484;K01480;K00294;K00147;K00931;K09251;K01259;K05604;K00273	104	TRINITY_DN47_c0_g1;TRINITY_DN210_c0_g1;TRINITY_DN343_c0_g1;TRINITY_DN583_c1_g1;TRINITY_DN587_c0_g1;TRINITY_DN709_c0_g1;TRINITY_DN901_c1_g1;TRINITY_DN954_c0_g2;TRINITY_DN931_c3_g1;TRINITY_DN1080_c2_g2;TRINITY_DN1007_c1_g1;TRINITY_DN1163_c0_g1;TRINITY_DN1417_c0_g4;TRINITY_DN1417_c0_g1;TRINITY_DN1609_c0_g1;TRINITY_DN1906_c0_g1;TRINITY_DN2062_c0_g1;TRINITY_DN2797_c0_g1;TRINITY_DN2731_c3_g1;TRINITY_DN…
Mitophagy - animal	Transport and catabolism	Cellular Processes	44	K15485;K15637;K02833;K03115;K15590;K17907;K09105;K06030;K05410;K17987;K04440;K17985;K15464;K08334;K03097;K07827;K04570;K09455;K11851;K09408;K05688;K04684;K08341;K04451;K08339;K11839;K05704;K07870;K08268;K07829;K07830;K08860;K17771;K04556;K17454;K15465;K04735;K04374;K07871;K14381;K07831;K17969;K04551;K17986	104	TRINITY_DN121_c3_g1;TRINITY_DN237_c0_g4;TRINITY_DN237_c0_g2;TRINITY_DN203_c0_g3;TRINITY_DN332_c0_g1;TRINITY_DN534_c0_g1;TRINITY_DN615_c0_g1;TRINITY_DN712_c1_g1;TRINITY_DN833_c1_g1;TRINITY_DN923_c2_g1;TRINITY_DN1049_c0_g1;TRINITY_DN1232_c0_g1;TRINITY_DN1558_c0_g1;TRINITY_DN1558_c0_g2;TRINITY_DN1501_c0_g1;TRINITY_DN1771_c0_g1;TRINITY_DN1759_c0_g1;TRINITY_DN2160_c0_g1;TRINITY_DN2183_c2_g1;TRINITY_DN…
Endometrial cancer	Cancers: Specific types	Human Diseases	40	K00922;K02833;K10140;K06625;K04366;K03099;K06276;K02620;K04491;K04377;K04456;K04368;K04369;K03511;K01110;K04402;K05689;K07827;K08734;K02649;K09408;K04375;K05083;K04365;K04451;K02158;K04371;K04357;K04503;K14021;K04364;K02159;K04385;K03083;K05691;K04361;K04490;K04492;K02157;K02085	103	TRINITY_DN152_c0_g2;TRINITY_DN203_c0_g3;TRINITY_DN346_c1_g1;TRINITY_DN543_c0_g2;TRINITY_DN619_c0_g1;TRINITY_DN632_c0_g1;TRINITY_DN779_c2_g1;TRINITY_DN876_c1_g1;TRINITY_DN895_c0_g1;TRINITY_DN939_c0_g2;TRINITY_DN944_c0_g1;TRINITY_DN944_c0_g2;TRINITY_DN906_c2_g1;TRINITY_DN1216_c0_g1;TRINITY_DN1216_c0_g2;TRINITY_DN1552_c1_g1;TRINITY_DN1777_c3_g5;TRINITY_DN1716_c0_g1;TRINITY_DN1808_c4_g1;TRINITY_DN205…
Basal transcription factors	Transcription	Genetic Information Processing	34	K03124;K03127;K14651;K03139;K14535;K03134;K03137;K03125;K03120;K03121;K10843;K14649;K03143;K03136;K03128;K03133;K03142;K03141;K03131;K10844;K02202;K10845;K03129;K03135;K03126;K03122;K03138;K14650;K03123;K10842;K03132;K06634;K03144;K03130	102	TRINITY_DN23_c5_g1;TRINITY_DN293_c4_g1;TRINITY_DN674_c0_g4;TRINITY_DN605_c2_g1;TRINITY_DN702_c0_g1;TRINITY_DN703_c1_g1;TRINITY_DN1024_c2_g1;TRINITY_DN1164_c1_g1;TRINITY_DN1287_c3_g2;TRINITY_DN1447_c2_g1;TRINITY_DN1625_c0_g4;TRINITY_DN1625_c0_g1;TRINITY_DN1851_c0_g1;TRINITY_DN1975_c1_g1;TRINITY_DN2017_c5_g1;TRINITY_DN2264_c0_g2;TRINITY_DN2382_c3_g1;TRINITY_DN2436_c0_g1;TRINITY_DN2693_c0_g1;TRINITY…
Rheumatoid arthritis	Immune diseases	Human Diseases	48	K13377;K04383;K05482;K01371;K02149;K02154;K03661;K02147;K05408;K06752;K05448;K02148;K14624;K01365;K05433;K02144;K03662;K05476;K02145;K05096;K13375;K13376;K05147;K02150;K05405;K05475;K05506;K03157;K05413;K02146;K05121;K06464;K02155;K10160;K02153;K01388;K06470;K06490;K02151;K12499;K02152;K05412;K05453;K14625;K04379;K05427;K14379;K05473	102	TRINITY_DN156_c1_g2;TRINITY_DN645_c0_g1;TRINITY_DN645_c0_g2;TRINITY_DN770_c0_g1;TRINITY_DN714_c1_g1;TRINITY_DN784_c0_g1;TRINITY_DN775_c0_g1;TRINITY_DN775_c0_g2;TRINITY_DN775_c0_g3;TRINITY_DN1043_c0_g1;TRINITY_DN1125_c1_g1;TRINITY_DN1235_c6_g1;TRINITY_DN1647_c2_g1;TRINITY_DN1606_c0_g2;TRINITY_DN1687_c0_g1;TRINITY_DN1723_c0_g1;TRINITY_DN1723_c0_g2;TRINITY_DN1884_c1_g1;TRINITY_DN2185_c4_g1;TRINITY_D…
VEGF signaling pathway	Signal transduction	Environmental Information Processing	33	K04444;K17447;K00922;K02833;K07861;K04718;K04441;K04366;K04456;K04368;K04369;K04348;K04393;K04392;K05760;K05448;K16342;K07827;K02649;K01116;K02158;K05725;K04455;K05704;K04371;K06268;K07860;K02677;K11987;K19663;K05098;K05859;K19662	101	TRINITY_DN35_c0_g1;TRINITY_DN25_c0_g2;TRINITY_DN152_c0_g2;TRINITY_DN203_c0_g3;TRINITY_DN367_c0_g1;TRINITY_DN362_c0_g1;TRINITY_DN538_c1_g1;TRINITY_DN686_c0_g1;TRINITY_DN619_c0_g1;TRINITY_DN944_c0_g1;TRINITY_DN944_c0_g2;TRINITY_DN906_c2_g1;TRINITY_DN1216_c0_g1;TRINITY_DN1216_c0_g2;TRINITY_DN1311_c0_g1;TRINITY_DN1380_c1_g2;TRINITY_DN1380_c1_g1;TRINITY_DN1451_c0_g1;TRINITY_DN1451_c0_g2;TRINITY_DN1550…
Cysteine and methionine metabolism	Amino acid metabolism	Metabolism	36	K09880;K01920;K00789;K14455;K14454;K17398;K17989;K00016;K00456;K00558;K11205;K01251;K01611;K00772;K00548;K00025;K00026;K17399;K11204;K01697;K01011;K08967;K00797;K01758;K08964;K00826;K08963;K00802;K00651;K07173;K00815;K00024;K00827;K00549;K01919;K00544	100	TRINITY_DN165_c0_g1;TRINITY_DN171_c0_g1;TRINITY_DN456_c0_g1;TRINITY_DN456_c3_g1;TRINITY_DN709_c0_g1;TRINITY_DN931_c3_g1;TRINITY_DN918_c0_g1;TRINITY_DN1597_c3_g1;TRINITY_DN1681_c1_g1;TRINITY_DN1606_c4_g1;TRINITY_DN1887_c0_g1;TRINITY_DN1974_c0_g2;TRINITY_DN2048_c1_g1;TRINITY_DN3033_c0_g1;TRINITY_DN3152_c1_g1;TRINITY_DN3266_c0_g1;TRINITY_DN3345_c1_g2;TRINITY_DN3360_c0_g1;TRINITY_DN3314_c0_g4;TRINITY…
Antigen processing and presentation	Immune system	Organismal Systems	28	K08057;K08066;K06697;K08055;K06752;K08056;K01369;K04079;K08059;K01365;K06751;K08061;K08063;K03283;K08062;K05870;K06505;K09489;K06696;K08064;K08065;K06458;K06698;K07980;K07981;K08054;K06516;K06454	100	TRINITY_DN195_c0_g1;TRINITY_DN322_c3_g1;TRINITY_DN848_c1_g1;TRINITY_DN1570_c1_g1;TRINITY_DN1606_c0_g2;TRINITY_DN1652_c0_g1;TRINITY_DN1652_c0_g3;TRINITY_DN1820_c1_g1;TRINITY_DN2065_c1_g1;TRINITY_DN2240_c3_g1;TRINITY_DN2227_c1_g1;TRINITY_DN2396_c14_g1;TRINITY_DN2543_c0_g2;TRINITY_DN2556_c0_g1;TRINITY_DN2634_c0_g3;TRINITY_DN2773_c1_g1;TRINITY_DN2773_c0_g1;TRINITY_DN2773_c0_g2;TRINITY_DN2857_c0_g1;TR…
Fanconi anemia pathway	Replication and repair	Genetic Information Processing	46	K10894;K10882;K03165;K10849;K11137;K10993;K10888;K15078;K10895;K15361;K03511;K10990;K10901;K10905;K10870;K07466;K08734;K10606;K08775;K06640;K10897;K13960;K08991;K10848;K10892;K03510;K10896;K02350;K10898;K11832;K15365;K03509;K10605;K03515;K10740;K10484;K15363;K04482;K15362;K10739;K10893;K06054;K11511;K10858;K10891;K16618	98	TRINITY_DN322_c7_g1;TRINITY_DN472_c0_g3;TRINITY_DN610_c0_g1;TRINITY_DN730_c0_g1;TRINITY_DN793_c0_g1;TRINITY_DN1095_c0_g1;TRINITY_DN1556_c0_g1;TRINITY_DN1540_c0_g1;TRINITY_DN1535_c0_g1;TRINITY_DN1573_c0_g1;TRINITY_DN1552_c1_g1;TRINITY_DN1512_c0_g2;TRINITY_DN1775_c0_g1;TRINITY_DN1775_c0_g3;TRINITY_DN1888_c0_g1;TRINITY_DN2076_c8_g1;TRINITY_DN2168_c1_g1;TRINITY_DN2251_c1_g3;TRINITY_DN2251_c1_g2;TRINI…
Fructose and mannose metabolism	Carbohydrate metabolism	Metabolism	30	K00850;K01623;K00966;K14634;K05305;K17497;K00844;K00011;K01809;K02377;K00976;K01103;K01711;K00863;K00008;K01805;K12661;K12660;K02446;K01803;K11645;K03841;K19029;K00009;K01813;K00848;K19028;K01818;K19030;K01629	98	TRINITY_DN20_c0_g1;TRINITY_DN20_c0_g2;TRINITY_DN20_c0_g3;TRINITY_DN176_c4_g1;TRINITY_DN297_c3_g1;TRINITY_DN376_c0_g1;TRINITY_DN576_c0_g1;TRINITY_DN653_c3_g1;TRINITY_DN744_c0_g1;TRINITY_DN848_c0_g2;TRINITY_DN1140_c0_g1;TRINITY_DN1365_c1_g1;TRINITY_DN2060_c0_g1;TRINITY_DN2163_c0_g1;TRINITY_DN2265_c3_g1;TRINITY_DN2446_c0_g1;TRINITY_DN2601_c0_g1;TRINITY_DN2759_c0_g2;TRINITY_DN2837_c0_g4;TRINITY_DN283…
Starch and sucrose metabolism	Carbohydrate metabolism	Metabolism	26	K00688;K00693;K01513;K12316;K15779;K01810;K01835;K00844;K00963;K12317;K01084;K12047;K01176;K00700;K01196;K01194;K01203;K00750;K02438;K07024;K00975;K00703;K00697;K11809;K01177;K01187	98	TRINITY_DN69_c2_g2;TRINITY_DN69_c2_g1;TRINITY_DN601_c4_g1;TRINITY_DN641_c3_g1;TRINITY_DN817_c0_g1;TRINITY_DN1189_c3_g1;TRINITY_DN1182_c3_g1;TRINITY_DN1205_c4_g1;TRINITY_DN1626_c0_g1;TRINITY_DN1822_c0_g1;TRINITY_DN2075_c7_g1;TRINITY_DN2163_c0_g1;TRINITY_DN2265_c3_g1;TRINITY_DN2572_c2_g1;TRINITY_DN2660_c0_g1;TRINITY_DN2671_c1_g1;TRINITY_DN2837_c0_g4;TRINITY_DN2837_c0_g1;TRINITY_DN2837_c0_g2;TRINITY…
Complement and coagulation cascades	Immune system	Organismal Systems	57	K04004;K03898;K01335;K06557;K03990;K03989;K03996;K03982;K01333;K06462;K03909;K03900;K03901;K01313;K04008;K01330;K06251;K17252;K03993;K01323;K03985;K03917;K01320;K04009;K03915;K01334;K03987;K03902;K01343;K04007;K06464;K03997;K03912;K03992;K01328;K03916;K01348;K03905;K03986;K03907;K03995;K03983;K04001;K03904;K03903;K03910;K03994;K04010;K03908;K01332;K04235;K03988;K03911;K04000;K03998;K04236;K01315	97	TRINITY_DN30_c0_g1;TRINITY_DN229_c0_g1;TRINITY_DN543_c0_g1;TRINITY_DN800_c0_g2;TRINITY_DN986_c0_g1;TRINITY_DN986_c0_g3;TRINITY_DN979_c0_g1;TRINITY_DN1488_c2_g1;TRINITY_DN1537_c0_g3;TRINITY_DN1720_c0_g1;TRINITY_DN1848_c0_g1;TRINITY_DN1809_c0_g1;TRINITY_DN2299_c0_g1;TRINITY_DN2316_c0_g2;TRINITY_DN2541_c0_g1;TRINITY_DN2703_c1_g1;TRINITY_DN3029_c0_g1;TRINITY_DN3113_c0_g1;TRINITY_DN3257_c2_g1;TRINITY_…
Hedgehog signaling pathway	Signal transduction	Environmental Information Processing	32	K06225;K19608;K06226;K03362;K08439;K11989;K04678;K10523;K00910;K04439;K03869;K06230;K06233;K08958;K08957;K02161;K03347;K10394;K19605;K08960;K11101;K10151;K16797;K04503;K06229;K04345;K16798;K11990;K11988;K03083;K08959;K06231	96	TRINITY_DN8_c1_g1;TRINITY_DN146_c1_g1;TRINITY_DN263_c2_g1;TRINITY_DN332_c1_g1;TRINITY_DN504_c1_g3;TRINITY_DN504_c1_g1;TRINITY_DN582_c1_g1;TRINITY_DN980_c0_g2;TRINITY_DN1179_c0_g1;TRINITY_DN1245_c0_g1;TRINITY_DN1467_c3_g1;TRINITY_DN1467_c2_g1;TRINITY_DN1546_c0_g1;TRINITY_DN1578_c4_g1;TRINITY_DN1743_c0_g1;TRINITY_DN1743_c0_g2;TRINITY_DN1828_c4_g2;TRINITY_DN1880_c2_g1;TRINITY_DN1913_c0_g1;TRINITY_DN…
Amphetamine addiction	Substance dependence	Human Diseases	38	K05199;K08045;K04348;K09048;K00274;K05214;K04515;K05212;K05211;K06269;K05198;K04560;K04851;K06268;K05197;K05870;K04345;K04450;K02677;K04850;K04374;K05200;K09047;K19663;K04632;K09029;K05213;K02183;K15494;K15867;K04379;K01593;K05208;K00501;K08155;K05036;K04144;K19662	95	TRINITY_DN501_c3_g1;TRINITY_DN1003_c1_g1;TRINITY_DN1311_c0_g1;TRINITY_DN1322_c0_g1;TRINITY_DN1322_c0_g2;TRINITY_DN1590_c0_g2;TRINITY_DN1609_c0_g1;TRINITY_DN1810_c1_g1;TRINITY_DN1805_c1_g1;TRINITY_DN2197_c0_g2;TRINITY_DN2123_c1_g3;TRINITY_DN2123_c2_g1;TRINITY_DN2123_c1_g5;TRINITY_DN2123_c1_g4;TRINITY_DN2343_c0_g1;TRINITY_DN2480_c5_g1;TRINITY_DN2846_c0_g1;TRINITY_DN3270_c0_g1;TRINITY_DN3270_c0_g2;T…
Longevity regulating pathway - multiple species	Aging	Organismal Systems	37	K07187;K04527;K00922;K02833;K06067;K04688;K16184;K04456;K08046;K08045;K08044;K07827;K02649;K07201;K09408;K16172;K04564;K08035;K03283;K08339;K04565;K05459;K09542;K07199;K07198;K03695;K03781;K08042;K04345;K07203;K08041;K08043;K08049;K05087;K18644;K07200;K08048	95	TRINITY_DN70_c0_g2;TRINITY_DN164_c1_g1;TRINITY_DN152_c0_g2;TRINITY_DN203_c0_g3;TRINITY_DN307_c2_g1;TRINITY_DN552_c0_g1;TRINITY_DN681_c0_g1;TRINITY_DN944_c0_g1;TRINITY_DN944_c0_g2;TRINITY_DN906_c2_g1;TRINITY_DN956_c1_g1;TRINITY_DN1003_c1_g1;TRINITY_DN1481_c0_g1;TRINITY_DN1499_c0_g1;TRINITY_DN1499_c0_g2;TRINITY_DN2183_c2_g1;TRINITY_DN2211_c0_g1;TRINITY_DN2584_c0_g1;TRINITY_DN2584_c0_g3;TRINITY_DN27…
Hematopoietic cell lineage	Immune system	Organismal Systems	56	K04737;K05066;K06485;K06484;K04383;K05454;K06448;K05090;K06752;K05079;K06493;K06481;K11140;K05055;K06854;K05068;K06261;K04008;K05061;K06503;K06469;K05405;K05423;K04387;K05071;K06480;K06483;K06460;K06455;K06451;K05092;K05091;K06575;K01242;K06476;K05431;K06465;K06449;K06452;K01389;K06458;K04386;K06259;K06498;K06450;K06468;K05453;K06263;K05427;K05461;K06454;K05072;K04391;K00977;K06466;K06467	94	TRINITY_DN54_c0_g1;TRINITY_DN138_c0_g1;TRINITY_DN264_c1_g1;TRINITY_DN459_c0_g1;TRINITY_DN645_c0_g1;TRINITY_DN645_c0_g2;TRINITY_DN1019_c0_g1;TRINITY_DN1033_c0_g1;TRINITY_DN1541_c0_g4;TRINITY_DN1606_c0_g2;TRINITY_DN1666_c1_g1;TRINITY_DN1812_c2_g2;TRINITY_DN1812_c2_g1;TRINITY_DN1814_c0_g1;TRINITY_DN2036_c0_g1;TRINITY_DN2139_c1_g1;TRINITY_DN2444_c0_g2;TRINITY_DN2615_c2_g1;TRINITY_DN2681_c1_g1;TRINITY…
Pertussis	Infectious diseases: Bacterial	Human Diseases	44	K05411;K06484;K04441;K04383;K04630;K03990;K03989;K02187;K04440;K08727;K02580;K01330;K04397;K12799;K05765;K05405;K09444;K04371;K05506;K12800;K04513;K05719;K13241;K10155;K03987;K01370;K06464;K04735;K10160;K05400;K05409;K03175;K03986;K02183;K04001;K05443;K03994;K05406;K01332;K03988;K05842;K04379;K10067;K04391	94	TRINITY_DN15_c0_g1;TRINITY_DN459_c0_g1;TRINITY_DN538_c1_g1;TRINITY_DN645_c0_g1;TRINITY_DN645_c0_g2;TRINITY_DN653_c0_g2;TRINITY_DN986_c0_g1;TRINITY_DN986_c0_g3;TRINITY_DN979_c0_g1;TRINITY_DN1155_c1_g1;TRINITY_DN1351_c3_g1;TRINITY_DN1558_c0_g1;TRINITY_DN1558_c0_g2;TRINITY_DN1550_c0_g1;TRINITY_DN1675_c0_g1;TRINITY_DN1823_c0_g1;TRINITY_DN1823_c0_g2;TRINITY_DN2303_c0_g1;TRINITY_DN2303_c0_g3;TRINITY_DN…
Sphingolipid metabolism	Lipid metabolism	Metabolism	30	K04718;K12309;K00654;K12353;K00720;K04710;K04708;K12352;K12357;K12349;K04716;K04715;K01080;K04717;K01202;K04711;K01441;K12348;K01634;K01134;K04714;K07553;K01201;K01190;K01186;K12351;K12350;K04712;K04628;K01019	92	TRINITY_DN362_c0_g1;TRINITY_DN686_c0_g1;TRINITY_DN740_c1_g1;TRINITY_DN723_c0_g1;TRINITY_DN723_c0_g3;TRINITY_DN968_c0_g1;TRINITY_DN993_c2_g1;TRINITY_DN1063_c2_g1;TRINITY_DN1206_c0_g1;TRINITY_DN1637_c0_g4;TRINITY_DN1637_c0_g3;TRINITY_DN1644_c0_g2;TRINITY_DN1735_c0_g1;TRINITY_DN1770_c0_g1;TRINITY_DN2053_c0_g2;TRINITY_DN2281_c4_g1;TRINITY_DN2496_c1_g1;TRINITY_DN2571_c0_g1;TRINITY_DN2585_c3_g1;TRINITY…
Cardiac muscle contraction	Circulatory system	Organismal Systems	46	K05742;K02270;K01539;K00414;K01540;K02273;K02271;K00420;K04859;K00413;K10375;K02263;K01538;K17751;K04851;K00418;K04872;K00416;K00415;K04962;K04863;K04860;K04858;K02262;K04850;K12314;K12045;K00411;K05865;K04864;K04869;K12749;K12044;K02266;K02264;K04853;K02256;K04865;K02265;K04861;K04862;K04867;K10351;K04871;K04873;K04857	92	TRINITY_DN157_c0_g1;TRINITY_DN297_c2_g1;TRINITY_DN271_c0_g1;TRINITY_DN271_c0_g3;TRINITY_DN894_c2_g1;TRINITY_DN914_c1_g1;TRINITY_DN1099_c2_g1;TRINITY_DN1266_c1_g1;TRINITY_DN1384_c0_g1;TRINITY_DN1691_c1_g1;TRINITY_DN1832_c0_g1;TRINITY_DN2024_c2_g1;TRINITY_DN2148_c5_g1;TRINITY_DN2379_c0_g1;TRINITY_DN2447_c0_g2;TRINITY_DN2666_c1_g1;TRINITY_DN2664_c0_g1;TRINITY_DN2784_c0_g1;TRINITY_DN2786_c0_g1;TRINIT…
Glycine, serine and threonine metabolism	Amino acid metabolism	Metabolism	41	K00276;K00542;K12235;K00058;K00613;K00382;K17989;K00274;K02437;K00306;K00314;K01834;K01620;K00049;K00108;K00643;K14085;K00600;K01697;K01758;K12972;K00552;K00281;K01837;K00090;K00130;K01696;K01695;K15789;K00830;K00605;K00827;K15633;K00060;K15634;K00831;K00544;K00872;K01753;K00273;K15893	92	TRINITY_DN291_c0_g1;TRINITY_DN587_c0_g1;TRINITY_DN663_c12_g1;TRINITY_DN840_c0_g1;TRINITY_DN1007_c1_g1;TRINITY_DN1498_c0_g1;TRINITY_DN1597_c3_g1;TRINITY_DN1609_c0_g1;TRINITY_DN2057_c3_g1;TRINITY_DN2239_c0_g2;TRINITY_DN2203_c0_g1;TRINITY_DN2212_c0_g1;TRINITY_DN2495_c1_g2;TRINITY_DN2495_c1_g1;TRINITY_DN2800_c0_g1;TRINITY_DN2945_c0_g1;TRINITY_DN3281_c0_g1;TRINITY_DN4270_c0_g1;TRINITY_DN4270_c0_g2;TRI…
Leishmaniasis	Infectious diseases: Parasitic	Human Diseases	38	K08009;K04404;K13377;K04441;K04383;K03990;K04403;K04427;K06752;K04734;K02580;K08010;K08011;K05133;K04375;K13375;K13376;K05697;K11217;K04371;K05132;K02581;K06483;K05719;K13241;K13536;K06464;K04735;K10160;K11987;K08012;K04447;K03175;K05443;K06498;K05406;K04379;K19662	90	TRINITY_DN189_c1_g1;TRINITY_DN100_c0_g1;TRINITY_DN156_c1_g2;TRINITY_DN538_c1_g1;TRINITY_DN645_c0_g1;TRINITY_DN645_c0_g2;TRINITY_DN986_c0_g1;TRINITY_DN986_c0_g3;TRINITY_DN1028_c0_g1;TRINITY_DN1077_c0_g1;TRINITY_DN1550_c0_g1;TRINITY_DN1606_c0_g2;TRINITY_DN1724_c0_g1;TRINITY_DN1823_c0_g1;TRINITY_DN1823_c0_g2;TRINITY_DN1977_c0_g1;TRINITY_DN2303_c0_g1;TRINITY_DN2303_c0_g3;TRINITY_DN2517_c0_g1;TRINITY_…
Tryptophan metabolism	Amino acid metabolism	Metabolism	29	K00128;K00816;K00157;K07515;K00022;K00274;K00626;K07514;K00164;K00543;K11182;K14085;K07511;K07410;K03781;K00149;K01432;K00562;K01556;K00502;K01782;K00453;K00452;K01593;K00825;K00486;K01825;K00463;K03782	90	TRINITY_DN47_c0_g1;TRINITY_DN110_c3_g1;TRINITY_DN668_c1_g1;TRINITY_DN985_c2_g1;TRINITY_DN1691_c3_g1;TRINITY_DN1691_c3_g2;TRINITY_DN1609_c0_g1;TRINITY_DN2289_c0_g1;TRINITY_DN2583_c0_g2;TRINITY_DN2867_c0_g2;TRINITY_DN3056_c1_g1;TRINITY_DN3187_c0_g1;TRINITY_DN3820_c1_g2;TRINITY_DN4157_c0_g1;TRINITY_DN4353_c0_g2;TRINITY_DN4572_c0_g1;TRINITY_DN4507_c0_g5;TRINITY_DN4507_c0_g1;TRINITY_DN4760_c0_g2;TRINI…
Citrate cycle (TCA cycle)	Carbohydrate metabolism	Metabolism	30	K00162;K00235;K00627;K00382;K00658;K13997;K00161;K01596;K00030;K00164;K01958;K00025;K00026;K01681;K01647;K00237;K01900;K00031;K01899;K01648;K01679;K00234;K00116;K01676;K01903;K00024;K00236;K00247;K01610;K00239	90	TRINITY_DN8_c0_g1;TRINITY_DN988_c0_g1;TRINITY_DN1295_c2_g2;TRINITY_DN1498_c0_g1;TRINITY_DN1526_c0_g1;TRINITY_DN1540_c1_g1;TRINITY_DN1751_c0_g1;TRINITY_DN1905_c0_g1;TRINITY_DN1905_c2_g2;TRINITY_DN2887_c0_g1;TRINITY_DN3056_c1_g1;TRINITY_DN3306_c0_g1;TRINITY_DN3820_c1_g2;TRINITY_DN3970_c0_g1;TRINITY_DN4347_c1_g1;TRINITY_DN4507_c0_g5;TRINITY_DN4507_c0_g1;TRINITY_DN4689_c2_g1;TRINITY_DN5030_c0_g1;TRIN…
Galactose metabolism	Carbohydrate metabolism	Metabolism	25	K00850;K07966;K01784;K12309;K12316;K15779;K01835;K00844;K00011;K00963;K12317;K00849;K01084;K12047;K01785;K00965;K01190;K01203;K08302;K16371;K02079;K00883;K12112;K01684;K01187	90	TRINITY_DN20_c0_g1;TRINITY_DN20_c0_g2;TRINITY_DN20_c0_g3;TRINITY_DN176_c4_g1;TRINITY_DN297_c3_g1;TRINITY_DN580_c0_g1;TRINITY_DN689_c0_g1;TRINITY_DN740_c1_g1;TRINITY_DN1140_c0_g1;TRINITY_DN1182_c3_g1;TRINITY_DN1205_c4_g1;TRINITY_DN1822_c0_g1;TRINITY_DN2163_c0_g1;TRINITY_DN2265_c3_g1;TRINITY_DN2446_c0_g1;TRINITY_DN2572_c2_g1;TRINITY_DN2601_c0_g1;TRINITY_DN2660_c0_g1;TRINITY_DN2618_c0_g1;TRINITY_DN2…
Renin secretion	Endocrine system	Organismal Systems	39	K12323;K04634;K13755;K04960;K19021;K04630;K08046;K08045;K04348;K04959;K04143;K05858;K04851;K04958;K13296;K04197;K06268;K04587;K04936;K09864;K05870;K04345;K04850;K16056;K04632;K04265;K05262;K02183;K04141;K04853;K12319;K12318;K19477;K04259;K05027;K05028;K04166;K01283;K04857	89	TRINITY_DN60_c3_g1;TRINITY_DN22_c0_g3;TRINITY_DN175_c0_g1;TRINITY_DN296_c3_g1;TRINITY_DN240_c2_g1;TRINITY_DN485_c1_g1;TRINITY_DN653_c0_g2;TRINITY_DN956_c1_g1;TRINITY_DN1003_c1_g1;TRINITY_DN1311_c0_g1;TRINITY_DN1973_c0_g1;TRINITY_DN1973_c0_g2;TRINITY_DN2210_c0_g1;TRINITY_DN2261_c0_g1;TRINITY_DN3270_c0_g1;TRINITY_DN3270_c0_g2;TRINITY_DN3259_c0_g1;TRINITY_DN3214_c0_g2;TRINITY_DN3250_c0_g1;TRINITY_DN…
Type II diabetes mellitus	Endocrine and metabolic diseases	Human Diseases	29	K07187;K04527;K00922;K07209;K07296;K04854;K04440;K07191;K04852;K06068;K18050;K07595;K00844;K02649;K04344;K00873;K04696;K04849;K16172;K04851;K04694;K04371;K04697;K18952;K04695;K07203;K04850;K12406;K05032	89	TRINITY_DN70_c0_g2;TRINITY_DN164_c1_g1;TRINITY_DN152_c0_g2;TRINITY_DN842_c0_g1;TRINITY_DN906_c2_g1;TRINITY_DN1070_c2_g3;TRINITY_DN1156_c3_g1;TRINITY_DN1558_c0_g1;TRINITY_DN1558_c0_g2;TRINITY_DN1582_c0_g1;TRINITY_DN1685_c0_g1;TRINITY_DN1719_c0_g1;TRINITY_DN1719_c1_g3;TRINITY_DN1719_c1_g2;TRINITY_DN1719_c1_g1;TRINITY_DN1719_c1_g4;TRINITY_DN2151_c2_g1;TRINITY_DN2163_c0_g1;TRINITY_DN2265_c3_g1;TRINIT…
Propanoate metabolism	Carbohydrate metabolism	Metabolism	32	K01895;K01946;K07515;K00382;K00016;K00626;K05605;K01908;K07514;K09699;K00249;K01578;K07511;K00140;K11262;K01900;K00167;K01965;K01899;K00166;K01966;K01847;K18426;K01782;K01734;K01963;K01903;K00005;K05606;K01825;K01962;K13524	86	TRINITY_DN116_c0_g1;TRINITY_DN116_c0_g3;TRINITY_DN436_c0_g2;TRINITY_DN985_c2_g1;TRINITY_DN1476_c7_g1;TRINITY_DN1498_c0_g1;TRINITY_DN1681_c1_g1;TRINITY_DN1974_c0_g2;TRINITY_DN2289_c0_g1;TRINITY_DN2357_c0_g1;TRINITY_DN2366_c0_g1;TRINITY_DN2583_c0_g2;TRINITY_DN2767_c0_g2;TRINITY_DN2870_c0_g1;TRINITY_DN3345_c1_g2;TRINITY_DN4099_c1_g4;TRINITY_DN4053_c1_g1;TRINITY_DN4144_c13_g1;TRINITY_DN4353_c0_g2;TRI…
Toll and Imd signaling pathway	Immune system	Organismal Systems	20	K16060;K04404;K03362;K04441;K06689;K07209;K04427;K04431;K02373;K04428;K04440;K04734;K02580;K10704;K04398;K04432;K10380;K13411;K04450;K10580	85	TRINITY_DN111_c2_g1;TRINITY_DN100_c0_g1;TRINITY_DN264_c2_g2;TRINITY_DN332_c1_g1;TRINITY_DN538_c1_g1;TRINITY_DN660_c6_g2;TRINITY_DN660_c6_g1;TRINITY_DN764_c0_g1;TRINITY_DN842_c0_g1;TRINITY_DN901_c3_g3;TRINITY_DN901_c3_g2;TRINITY_DN980_c0_g2;TRINITY_DN1077_c0_g1;TRINITY_DN1149_c1_g1;TRINITY_DN1204_c1_g1;TRINITY_DN1200_c0_g1;TRINITY_DN1558_c0_g1;TRINITY_DN1558_c0_g2;TRINITY_DN1568_c2_g1;TRINITY_DN15…
Systemic lupus erythematosus	Immune diseases	Human Diseases	32	K05699;K11253;K11087;K11251;K11086;K03990;K03989;K03996;K06752;K01330;K11089;K11090;K05413;K03987;K01327;K11252;K03997;K06470;K11088;K03986;K03995;K05443;K03994;K03160;K06498;K05412;K01332;K03988;K01319;K04000;K03998;K03161	84	TRINITY_DN151_c6_g1;TRINITY_DN297_c1_g1;TRINITY_DN262_c1_g1;TRINITY_DN669_c0_g1;TRINITY_DN724_c0_g1;TRINITY_DN901_c8_g1;TRINITY_DN986_c0_g1;TRINITY_DN986_c0_g3;TRINITY_DN979_c0_g1;TRINITY_DN1488_c2_g1;TRINITY_DN1606_c0_g2;TRINITY_DN2548_c0_g1;TRINITY_DN3029_c0_g1;TRINITY_DN3624_c2_g1;TRINITY_DN3953_c0_g1;TRINITY_DN3993_c0_g1;TRINITY_DN4805_c0_g1;TRINITY_DN5146_c2_g1;TRINITY_DN5698_c0_g1;TRINITY_D…
N-Glycan biosynthesis	Glycan biosynthesis and metabolism	Metabolism	36	K00721;K03845;K00779;K07966;K00729;K03847;K01230;K12670;K00738;K03850;K01001;K07432;K00736;K12666;K03842;K03849;K05546;K00778;K00717;K03844;K01231;K09658;K12668;K07441;K12669;K00737;K07151;K03843;K12667;K03846;K00726;K00744;K07968;K09659;K13748;K01228	84	TRINITY_DN158_c1_g1;TRINITY_DN223_c2_g1;TRINITY_DN395_c3_g1;TRINITY_DN580_c0_g1;TRINITY_DN852_c2_g2;TRINITY_DN852_c2_g1;TRINITY_DN1181_c0_g1;TRINITY_DN1128_c0_g2;TRINITY_DN1327_c0_g1;TRINITY_DN1527_c2_g1;TRINITY_DN1623_c1_g1;TRINITY_DN2323_c2_g2;TRINITY_DN2776_c1_g1;TRINITY_DN3098_c0_g1;TRINITY_DN3028_c0_g1;TRINITY_DN3457_c1_g1;TRINITY_DN3858_c0_g1;TRINITY_DN4310_c0_g4;TRINITY_DN5385_c1_g1;TRINIT…
Pentose and glucuronate interconversions	Carbohydrate metabolism	Metabolism	25	K00078;K00002;K01783;K00012;K00011;K00963;K03331;K00699;K00854;K13247;K01686;K01195;K00008;K01805;K14756;K08092;K01815;K00848;K00853;K08323;K01812;K03079;K03078;K03077;K01629	84	TRINITY_DN308_c0_g2;TRINITY_DN1374_c0_g2;TRINITY_DN1439_c0_g1;TRINITY_DN2226_c12_g1;TRINITY_DN2446_c0_g1;TRINITY_DN2572_c2_g1;TRINITY_DN2601_c0_g1;TRINITY_DN3142_c1_g1;TRINITY_DN3216_c0_g1;TRINITY_DN3778_c4_g1;TRINITY_DN3785_c4_g1;TRINITY_DN4145_c4_g1;TRINITY_DN4135_c1_g1;TRINITY_DN4540_c5_g1;TRINITY_DN4540_c0_g1;TRINITY_DN4540_c0_g2;TRINITY_DN5043_c5_g1;TRINITY_DN5010_c2_g1;TRINITY_DN5450_c0_g1;…
Ferroptosis	Cell growth and death	Cellular Processes	28	K08337;K13625;K10435;K13162;K14720;K06519;K01897;K14714;K15041;K00657;K15040;K09289;K11205;K00510;K14685;K04451;K06503;K08339;K05361;K12889;K14736;K10142;K13624;K11204;K13869;K00460;K00522;K13515	84	TRINITY_DN29_c5_g1;TRINITY_DN581_c0_g1;TRINITY_DN723_c1_g3;TRINITY_DN723_c1_g2;TRINITY_DN994_c0_g1;TRINITY_DN1068_c2_g1;TRINITY_DN1080_c2_g1;TRINITY_DN1138_c1_g1;TRINITY_DN1158_c2_g1;TRINITY_DN1288_c4_g1;TRINITY_DN1375_c1_g1;TRINITY_DN1906_c0_g1;TRINITY_DN1925_c1_g1;TRINITY_DN1900_c1_g1;TRINITY_DN2048_c1_g1;TRINITY_DN2192_c0_g1;TRINITY_DN2640_c3_g1;TRINITY_DN2776_c0_g1;TRINITY_DN3094_c0_g1;TRINIT…
Proteoglycans	Protein families: signaling and cellular processes	Brite Hierarchies	41	K06669;K06823;K06254;K04660;K06255;K08126;K08132;K08117;K06849;K08134;K08123;K08129;K04520;K08107;K08130;K08125;K08114;K08121;K08115;K08118;K06795;K08116;K05843;K06505;K16336;K08135;K08122;K08136;K03907;K08127;K08120;K08108;K08119;K08124;K08111;K08131;K06794;K08110;K06792;K06257;K16337	84	TRINITY_DN31_c0_g1;TRINITY_DN184_c1_g1;TRINITY_DN957_c0_g1;TRINITY_DN946_c7_g1;TRINITY_DN1045_c0_g1;TRINITY_DN1736_c1_g1;TRINITY_DN1733_c0_g1;TRINITY_DN1808_c2_g1;TRINITY_DN1868_c1_g2;TRINITY_DN1868_c1_g1;TRINITY_DN2024_c5_g1;TRINITY_DN2086_c1_g1;TRINITY_DN2698_c0_g1;TRINITY_DN2726_c1_g1;TRINITY_DN3077_c0_g1;TRINITY_DN3641_c1_g4;TRINITY_DN3794_c0_g1;TRINITY_DN4068_c0_g1;TRINITY_DN4176_c4_g1;TRINI…
Glyoxylate and dicarboxylate metabolism	Carbohydrate metabolism	Metabolism	34	K01895;K00382;K11517;K01816;K02437;K00626;K00049;K18123;K00025;K00026;K03781;K01681;K01647;K00600;K01965;K12972;K01966;K01847;K01432;K01433;K00124;K00281;K01637;K00104;K00090;K00042;K03779;K03780;K00024;K00830;K05606;K00605;K00284;K15893	83	TRINITY_DN116_c0_g1;TRINITY_DN116_c0_g3;TRINITY_DN1498_c0_g1;TRINITY_DN1410_c0_g1;TRINITY_DN1566_c0_g1;TRINITY_DN2057_c3_g1;TRINITY_DN2289_c0_g1;TRINITY_DN2945_c0_g1;TRINITY_DN3053_c1_g1;TRINITY_DN3970_c0_g1;TRINITY_DN4347_c1_g1;TRINITY_DN4353_c0_g2;TRINITY_DN4906_c0_g2;TRINITY_DN5030_c0_g1;TRINITY_DN5883_c1_g1;TRINITY_DN5977_c0_g1;TRINITY_DN5934_c0_g2;TRINITY_DN8357_c0_g1;TRINITY_DN9807_c0_g5;TR…
Alanine, aspartate and glutamate metabolism	Amino acid metabolism	Metabolism	31	K13566;K14455;K14454;K01756;K01425;K01580;K00820;K01939;K18310;K01953;K00764;K14592;K00261;K11540;K01940;K00814;K18311;K00610;K00609;K01755;K01437;K14260;K18309;K00272;K01948;K01914;K00830;K00294;K00827;K00278;K13524	83	TRINITY_DN660_c0_g1;TRINITY_DN709_c0_g1;TRINITY_DN931_c3_g1;TRINITY_DN1204_c1_g2;TRINITY_DN2161_c6_g1;TRINITY_DN2439_c0_g2;TRINITY_DN2486_c1_g1;TRINITY_DN3647_c0_g2;TRINITY_DN3757_c5_g1;TRINITY_DN4045_c0_g2;TRINITY_DN4120_c0_g1;TRINITY_DN4214_c1_g1;TRINITY_DN4774_c0_g1;TRINITY_DN6322_c0_g2;TRINITY_DN6689_c0_g1;TRINITY_DN6689_c0_g2;TRINITY_DN7284_c0_g2;TRINITY_DN7390_c1_g1;TRINITY_DN7542_c0_g1;TRI…
Pattern recognition receptors	Protein families: signaling and cellular processes	Brite Hierarchies	29	K12646;K10168;K12798;K12805;K12807;K12649;K10071;K08727;K06560;K06563;K12653;K10169;K12800;K10057;K10161;K10160;K10073;K17516;K10165;K12647;K08763;K05404;K18807;K10170;K10070;K06559;K10069;K10059;K18808	81	TRINITY_DN45_c0_g1;TRINITY_DN118_c1_g1;TRINITY_DN415_c4_g1;TRINITY_DN538_c1_g2;TRINITY_DN613_c0_g1;TRINITY_DN613_c0_g3;TRINITY_DN1211_c0_g1;TRINITY_DN1386_c0_g2;TRINITY_DN1675_c0_g1;TRINITY_DN1692_c0_g1;TRINITY_DN1692_c0_g3;TRINITY_DN1755_c0_g1;TRINITY_DN1911_c1_g1;TRINITY_DN1911_c0_g1;TRINITY_DN2183_c1_g1;TRINITY_DN3019_c0_g1;TRINITY_DN3122_c0_g1;TRINITY_DN3122_c0_g2;TRINITY_DN3122_c4_g1;TRINITY…
Amyotrophic lateral sclerosis (ALS)	Neurodegenerative diseases	Human Diseases	36	K07887;K04575;K04441;K04426;K04726;K02187;K04348;K04392;K04569;K08738;K04570;K05212;K05211;K02161;K05141;K05198;K04451;K02158;K02084;K04432;K04565;K06268;K05197;K03781;K03158;K11518;K01370;K11519;K04574;K02159;K04433;K05613;K02308;K13240;K05208;K04572	81	TRINITY_DN124_c0_g1;TRINITY_DN519_c0_g1;TRINITY_DN538_c1_g1;TRINITY_DN611_c4_g1;TRINITY_DN1148_c3_g1;TRINITY_DN1155_c1_g1;TRINITY_DN1311_c0_g1;TRINITY_DN1451_c0_g1;TRINITY_DN1451_c0_g2;TRINITY_DN1550_c0_g1;TRINITY_DN1945_c0_g1;TRINITY_DN1933_c0_g2;TRINITY_DN2158_c1_g1;TRINITY_DN2123_c1_g3;TRINITY_DN2123_c2_g1;TRINITY_DN2123_c1_g5;TRINITY_DN2123_c1_g4;TRINITY_DN2191_c6_g1;TRINITY_DN2220_c0_g1;TRIN…
Autophagy - other	Transport and catabolism	Cellular Processes	21	K08337;K08269;K17906;K04382;K08331;K17908;K17907;K17890;K08342;K08334;K08341;K08339;K08336;K08333;K00914;K07203;K17606;K08343;K17888;K08266;K19730	80	TRINITY_DN29_c5_g1;TRINITY_DN270_c0_g1;TRINITY_DN270_c0_g2;TRINITY_DN387_c2_g1;TRINITY_DN409_c0_g1;TRINITY_DN417_c0_g1;TRINITY_DN540_c0_g3;TRINITY_DN632_c1_g1;TRINITY_DN615_c0_g1;TRINITY_DN923_c2_g1;TRINITY_DN1025_c0_g1;TRINITY_DN1065_c0_g1;TRINITY_DN1065_c0_g2;TRINITY_DN1140_c5_g1;TRINITY_DN1759_c0_g1;TRINITY_DN1768_c6_g1;TRINITY_DN1895_c1_g1;TRINITY_DN2164_c1_g1;TRINITY_DN2555_c2_g2;TRINITY_DN2…
Pentose phosphate pathway	Carbohydrate metabolism	Metabolism	21	K00850;K01623;K00615;K15779;K00036;K01783;K01810;K01835;K00948;K00033;K13937;K01807;K00616;K01619;K01053;K02446;K01839;K00090;K11645;K03841;K00852	80	TRINITY_DN20_c0_g1;TRINITY_DN20_c0_g2;TRINITY_DN20_c0_g3;TRINITY_DN176_c4_g1;TRINITY_DN297_c3_g1;TRINITY_DN376_c0_g1;TRINITY_DN643_c1_g1;TRINITY_DN1140_c0_g1;TRINITY_DN1205_c4_g1;TRINITY_DN1287_c1_g2;TRINITY_DN1439_c0_g1;TRINITY_DN1626_c0_g1;TRINITY_DN1822_c0_g1;TRINITY_DN1902_c1_g1;TRINITY_DN2555_c2_g3;TRINITY_DN3693_c2_g1;TRINITY_DN3746_c1_g2;TRINITY_DN3887_c0_g2;TRINITY_DN4533_c0_g1;TRINITY_DN…
Regulation of lipolysis in adipocytes	Endocrine system	Organismal Systems	36	K12323;K07187;K04527;K00922;K04630;K00509;K07376;K04456;K08046;K08045;K16816;K08044;K04143;K02649;K16172;K16817;K01054;K08771;K13296;K07188;K08042;K04204;K04345;K13699;K11987;K08041;K04632;K04265;K08043;K04249;K04141;K08049;K19477;K08768;K08048;K05251	79	TRINITY_DN60_c3_g1;TRINITY_DN70_c0_g2;TRINITY_DN164_c1_g1;TRINITY_DN152_c0_g2;TRINITY_DN653_c0_g2;TRINITY_DN734_c0_g1;TRINITY_DN804_c1_g1;TRINITY_DN944_c0_g1;TRINITY_DN944_c0_g2;TRINITY_DN906_c2_g1;TRINITY_DN956_c1_g1;TRINITY_DN1003_c1_g1;TRINITY_DN1139_c0_g1;TRINITY_DN1481_c0_g1;TRINITY_DN2210_c0_g1;TRINITY_DN2261_c0_g1;TRINITY_DN2211_c0_g1;TRINITY_DN2747_c2_g3;TRINITY_DN3106_c1_g1;TRINITY_DN327…
Taste transduction	Sensory system	Organismal Systems	32	K04615;K13755;K04960;K04626;K08046;K04827;K08044;K04825;K04344;K01509;K04916;K04624;K04345;K04824;K04850;K04957;K04153;K04271;K04131;K07825;K05175;K04841;K04836;K04834;K05216;K04980;K04270;K04603;K04990;K04989;K08048;K04819	78	TRINITY_DN48_c1_g1;TRINITY_DN175_c0_g1;TRINITY_DN296_c3_g1;TRINITY_DN373_c0_g1;TRINITY_DN956_c1_g1;TRINITY_DN1231_c0_g2;TRINITY_DN1481_c0_g1;TRINITY_DN1973_c0_g1;TRINITY_DN2127_c0_g1;TRINITY_DN2273_c1_g1;TRINITY_DN3535_c1_g1;TRINITY_DN4119_c0_g1;TRINITY_DN5540_c0_g1;TRINITY_DN6424_c0_g3;TRINITY_DN7393_c0_g1;TRINITY_DN7770_c0_g1;TRINITY_DN7842_c0_g1;TRINITY_DN7991_c1_g1;TRINITY_DN8458_c0_g1;TRINIT…
Cytosolic DNA-sensing pathway	Immune system	Organismal Systems	41	K05411;K12646;K03026;K12648;K03022;K17834;K05482;K07209;K03016;K05410;K07211;K08847;K12968;K04734;K02580;K07210;K03024;K03021;K03009;K12799;K05405;K12967;K12654;K02581;K02861;K04467;K05414;K12671;K01370;K14721;K03023;K12965;K12964;K04735;K03025;K03013;K03018;K03019;K12499;K12966;K03027	78	TRINITY_DN15_c0_g1;TRINITY_DN45_c0_g1;TRINITY_DN307_c1_g1;TRINITY_DN675_c0_g1;TRINITY_DN688_c1_g1;TRINITY_DN622_c6_g1;TRINITY_DN770_c0_g1;TRINITY_DN842_c0_g1;TRINITY_DN1014_c0_g1;TRINITY_DN1049_c0_g1;TRINITY_DN1120_c0_g1;TRINITY_DN1120_c0_g2;TRINITY_DN1351_c3_g1;TRINITY_DN1481_c0_g2;TRINITY_DN1656_c0_g1;TRINITY_DN1724_c0_g1;TRINITY_DN1823_c0_g1;TRINITY_DN1823_c0_g2;TRINITY_DN1925_c0_g1;TRINITY_DN…
beta-Alanine metabolism	Metabolism of other amino acids	Metabolism	28	K00128;K00276;K12259;K07515;K08660;K14755;K05605;K01580;K07514;K00249;K00129;K01578;K14085;K07511;K00140;K00149;K00797;K00137;K01464;K00802;K01782;K00207;K01431;K18966;K01918;K01825;K13524;K05604	77	TRINITY_DN47_c0_g1;TRINITY_DN291_c0_g1;TRINITY_DN583_c1_g1;TRINITY_DN985_c2_g1;TRINITY_DN1080_c2_g2;TRINITY_DN1163_c0_g1;TRINITY_DN2239_c0_g2;TRINITY_DN2357_c0_g1;TRINITY_DN2439_c0_g2;TRINITY_DN2583_c0_g2;TRINITY_DN2731_c3_g1;TRINITY_DN2870_c0_g1;TRINITY_DN3308_c0_g1;TRINITY_DN3873_c0_g1;TRINITY_DN4099_c1_g4;TRINITY_DN4044_c0_g1;TRINITY_DN4053_c1_g1;TRINITY_DN4144_c13_g1;TRINITY_DN4157_c0_g1;TRIN…
Homologous recombination	Replication and repair	Genetic Information Processing	38	K10873;K10882;K10867;K03165;K19528;K02327;K11864;K10901;K10870;K07466;K10869;K08775;K03111;K10728;K02328;K10897;K04728;K08991;K10880;K10865;K10683;K10605;K10740;K04482;K15362;K10739;K02317;K12173;K03551;K03550;K01159;K06187;K10877;K10866;K10879;K03553;K03629;K03505	77	TRINITY_DN494_c9_g1;TRINITY_DN472_c0_g3;TRINITY_DN503_c1_g2;TRINITY_DN610_c0_g1;TRINITY_DN725_c3_g1;TRINITY_DN1127_c0_g1;TRINITY_DN1315_c1_g1;TRINITY_DN1775_c0_g1;TRINITY_DN1775_c0_g3;TRINITY_DN2076_c8_g1;TRINITY_DN2168_c1_g1;TRINITY_DN2251_c1_g3;TRINITY_DN2251_c1_g2;TRINITY_DN2213_c1_g2;TRINITY_DN2213_c1_g1;TRINITY_DN2348_c2_g1;TRINITY_DN2438_c1_g1;TRINITY_DN2608_c0_g2;TRINITY_DN2828_c1_g2;TRINI…
Methane metabolism	Energy metabolism	Metabolism	20	K00850;K01895;K01623;K00058;K01689;K01834;K00600;K00863;K00121;K01070;K00124;K02446;K11645;K03841;K00024;K00830;K01595;K15633;K15634;K00831	77	TRINITY_DN20_c0_g1;TRINITY_DN20_c0_g2;TRINITY_DN20_c0_g3;TRINITY_DN176_c4_g1;TRINITY_DN116_c0_g1;TRINITY_DN116_c0_g3;TRINITY_DN297_c3_g1;TRINITY_DN376_c0_g1;TRINITY_DN840_c0_g1;TRINITY_DN1140_c0_g1;TRINITY_DN1613_c1_g1;TRINITY_DN2495_c1_g2;TRINITY_DN2495_c1_g1;TRINITY_DN2526_c1_g2;TRINITY_DN2526_c1_g1;TRINITY_DN2854_c2_g1;TRINITY_DN3746_c1_g2;TRINITY_DN5641_c0_g1;TRINITY_DN5641_c0_g2;TRINITY_DN59…
Bladder cancer	Cancers: Specific types	Human Diseases	35	K05094;K02833;K06625;K04366;K04377;K16857;K01398;K02089;K04368;K04369;K08803;K05448;K05689;K09850;K07827;K00758;K04445;K05083;K04365;K04451;K06621;K05704;K04371;K04357;K04503;K17454;K09389;K06620;K01388;K06618;K04361;K06643;K08523;K19520;K01403	76	TRINITY_DN86_c3_g2;TRINITY_DN203_c0_g3;TRINITY_DN543_c0_g2;TRINITY_DN619_c0_g1;TRINITY_DN939_c0_g2;TRINITY_DN1044_c0_g1;TRINITY_DN1084_c1_g1;TRINITY_DN1268_c0_g1;TRINITY_DN1216_c0_g1;TRINITY_DN1216_c0_g2;TRINITY_DN1468_c0_g1;TRINITY_DN1687_c0_g1;TRINITY_DN1808_c4_g1;TRINITY_DN1950_c0_g1;TRINITY_DN1950_c0_g2;TRINITY_DN2183_c2_g1;TRINITY_DN2159_c0_g1;TRINITY_DN2772_c0_g1;TRINITY_DN3098_c2_g1;TRINIT…
Ether lipid metabolism	Lipid metabolism	Metabolism	22	K01062;K13512;K00994;K01115;K16795;K16343;K13644;K16342;K13510;K01080;K00993;K16817;K16794;K14621;K01047;K00803;K01122;K16860;K04628;K08743;K01019;K18575	76	TRINITY_DN658_c0_g1;TRINITY_DN747_c0_g1;TRINITY_DN1124_c6_g1;TRINITY_DN1267_c0_g1;TRINITY_DN1267_c1_g3;TRINITY_DN1267_c1_g5;TRINITY_DN1267_c1_g4;TRINITY_DN1456_c0_g1;TRINITY_DN1676_c0_g1;TRINITY_DN1966_c1_g2;TRINITY_DN1966_c1_g1;TRINITY_DN2057_c1_g1;TRINITY_DN2200_c1_g1;TRINITY_DN2203_c1_g1;TRINITY_DN2571_c0_g1;TRINITY_DN2781_c0_g1;TRINITY_DN3106_c1_g1;TRINITY_DN3830_c2_g1;TRINITY_DN3956_c0_g1;TR…
Basal cell carcinoma	Cancers: Specific types	Human Diseases	43	K06225;K02432;K06226;K00444;K10140;K04662;K02353;K06625;K02620;K04491;K03511;K04402;K06230;K11101;K04451;K16797;K14021;K02354;K01384;K06229;K00182;K02842;K02329;K02235;K00572;K00445;K02376;K16798;K00408;K01064;K02159;K04385;K11988;K01357;K03083;K01558;K04490;K06231;K04492;K00312;K00714;K02157;K02085	76	TRINITY_DN8_c1_g1;TRINITY_DN240_c0_g1;TRINITY_DN263_c2_g1;TRINITY_DN217_c11_g1;TRINITY_DN217_c0_g3;TRINITY_DN346_c1_g1;TRINITY_DN512_c0_g2;TRINITY_DN562_c1_g2;TRINITY_DN543_c0_g2;TRINITY_DN876_c1_g1;TRINITY_DN895_c0_g1;TRINITY_DN1552_c1_g1;TRINITY_DN1716_c0_g1;TRINITY_DN1828_c4_g2;TRINITY_DN2052_c0_g1;TRINITY_DN2926_c0_g1;TRINITY_DN3154_c1_g1;TRINITY_DN3252_c0_g1;TRINITY_DN4276_c1_g1;TRINITY_DN45…
Porphyrin and chlorophyll metabolism	Metabolism of cofactors and vitamins	Metabolism	31	K02257;K01599;K19054;K14735;K01885;K00231;K00798;K01698;K00510;K14163;K01719;K00699;K01764;K13624;K00228;K00643;K01749;K02259;K00214;K04032;K01195;K03594;K02302;K19221;K01845;K01772;K02492;K00768;K02233;K00218;K09882	75	TRINITY_DN184_c1_g2;TRINITY_DN265_c1_g1;TRINITY_DN1077_c2_g1;TRINITY_DN1329_c0_g1;TRINITY_DN1570_c2_g2;TRINITY_DN1570_c2_g1;TRINITY_DN1620_c0_g1;TRINITY_DN1655_c0_g2;TRINITY_DN1881_c0_g1;TRINITY_DN1881_c0_g2;TRINITY_DN2192_c0_g1;TRINITY_DN2640_c3_g1;TRINITY_DN3338_c1_g1;TRINITY_DN3474_c0_g2;TRINITY_DN3646_c0_g1;TRINITY_DN3785_c4_g1;TRINITY_DN3937_c0_g1;TRINITY_DN4018_c0_g1;TRINITY_DN4154_c1_g1;TR…
Hedgehog signaling pathway - fly	Signal transduction	Environmental Information Processing	19	K03094;K06225;K09319;K06226;K03362;K08291;K04662;K04678;K10523;K03869;K08958;K08957;K03347;K08960;K03868;K06228;K06229;K04345;K03083	74	TRINITY_DN85_c0_g1;TRINITY_DN8_c1_g1;TRINITY_DN250_c2_g2;TRINITY_DN263_c2_g1;TRINITY_DN332_c1_g1;TRINITY_DN447_c1_g1;TRINITY_DN512_c0_g2;TRINITY_DN649_c1_g1;TRINITY_DN980_c0_g2;TRINITY_DN1179_c0_g1;TRINITY_DN1245_c0_g1;TRINITY_DN1578_c4_g1;TRINITY_DN1743_c0_g1;TRINITY_DN1743_c0_g2;TRINITY_DN1913_c0_g1;TRINITY_DN1946_c1_g1;TRINITY_DN2110_c0_g1;TRINITY_DN2283_c0_g1;TRINITY_DN2276_c5_g1;TRINITY_DN28…
Endocrine and other factor-regulated calcium reabsorption	Excretory system	Organismal Systems	28	K04634;K01528;K01539;K11825;K01540;K11824;K08046;K07904;K04646;K01538;K11827;K11826;K05858;K04644;K04585;K04345;K04974;K02677;K08539;K19663;K03916;K08550;K04632;K14757;K14756;K08049;K04645;K19662	72	TRINITY_DN22_c0_g3;TRINITY_DN122_c1_g1;TRINITY_DN271_c0_g1;TRINITY_DN271_c0_g3;TRINITY_DN339_c1_g1;TRINITY_DN485_c1_g1;TRINITY_DN447_c0_g1;TRINITY_DN447_c0_g2;TRINITY_DN725_c1_g1;TRINITY_DN914_c1_g1;TRINITY_DN919_c0_g1;TRINITY_DN956_c1_g1;TRINITY_DN1107_c1_g2;TRINITY_DN1384_c0_g1;TRINITY_DN2148_c5_g1;TRINITY_DN2666_c1_g1;TRINITY_DN2766_c0_g1;TRINITY_DN2784_c0_g1;TRINITY_DN2750_c0_g1;TRINITY_DN279…
Nicotinate and nicotinamide metabolism	Metabolism of cofactors and vitamins	Metabolism	21	K00157;K01081;K03783;K01513;K00763;K00858;K06210;K03462;K10524;K01950;K00323;K01242;K03426;K03517;K00541;K18152;K01916;K00322;K00969;K00278;K03787	71	TRINITY_DN668_c1_g1;TRINITY_DN679_c0_g1;TRINITY_DN679_c2_g1;TRINITY_DN891_c0_g1;TRINITY_DN891_c0_g2;TRINITY_DN909_c0_g4;TRINITY_DN1189_c3_g1;TRINITY_DN1126_c0_g2;TRINITY_DN1494_c0_g1;TRINITY_DN1544_c3_g1;TRINITY_DN2191_c1_g2;TRINITY_DN2671_c1_g1;TRINITY_DN2994_c0_g1;TRINITY_DN3054_c0_g1;TRINITY_DN3219_c1_g1;TRINITY_DN3507_c0_g2;TRINITY_DN3948_c0_g1;TRINITY_DN4109_c1_g2;TRINITY_DN4768_c8_g1;TRINIT…
Carbohydrate digestion and absorption	Digestive system	Organismal Systems	17	K00922;K01539;K04626;K01540;K04456;K08143;K00844;K02649;K01538;K04851;K01084;K12047;K01176;K14158;K01203;K08171;K19662	70	TRINITY_DN152_c0_g2;TRINITY_DN271_c0_g1;TRINITY_DN271_c0_g3;TRINITY_DN373_c0_g1;TRINITY_DN914_c1_g1;TRINITY_DN944_c0_g1;TRINITY_DN944_c0_g2;TRINITY_DN906_c2_g1;TRINITY_DN1384_c0_g1;TRINITY_DN1805_c2_g1;TRINITY_DN2163_c0_g1;TRINITY_DN2148_c5_g1;TRINITY_DN2265_c3_g1;TRINITY_DN2211_c0_g1;TRINITY_DN2666_c1_g1;TRINITY_DN2784_c0_g1;TRINITY_DN2750_c0_g1;TRINITY_DN2837_c0_g4;TRINITY_DN2837_c0_g1;TRINITY_…
Antifolate resistance	Drug resistance: Antineoplastic	Human Diseases	23	K05665;K07209;K05673;K05681;K00458;K00560;K02580;K07210;K14609;K01930;K05405;K14613;K04467;K05666;K01307;K00600;K11787;K00297;K05667;K04735;K13649;K00602;K05668	70	TRINITY_DN674_c2_g1;TRINITY_DN842_c0_g1;TRINITY_DN1115_c0_g2;TRINITY_DN1345_c1_g2;TRINITY_DN1561_c0_g1;TRINITY_DN1790_c0_g3;TRINITY_DN1823_c0_g1;TRINITY_DN1823_c0_g2;TRINITY_DN1925_c0_g1;TRINITY_DN2057_c2_g1;TRINITY_DN2183_c0_g1;TRINITY_DN2754_c1_g2;TRINITY_DN3651_c0_g1;TRINITY_DN4034_c2_g1;TRINITY_DN4648_c0_g2;TRINITY_DN4843_c1_g1;TRINITY_DN5022_c0_g1;TRINITY_DN5729_c2_g1;TRINITY_DN5774_c0_g1;TR…
Various types of N-glycan biosynthesis	Glycan biosynthesis and metabolism	Metabolism	30	K03845;K07966;K12373;K03847;K01230;K12670;K00738;K00781;K14459;K07432;K00736;K12666;K03842;K09656;K00717;K03844;K01231;K09657;K12668;K07441;K12669;K07151;K03843;K12667;K09672;K03846;K00726;K07968;K09673;K13748	70	TRINITY_DN223_c2_g1;TRINITY_DN580_c0_g1;TRINITY_DN739_c0_g1;TRINITY_DN852_c2_g2;TRINITY_DN852_c2_g1;TRINITY_DN951_c0_g2;TRINITY_DN1128_c0_g2;TRINITY_DN1327_c0_g1;TRINITY_DN1527_c2_g1;TRINITY_DN1623_c1_g1;TRINITY_DN1784_c0_g1;TRINITY_DN1895_c0_g1;TRINITY_DN3098_c0_g1;TRINITY_DN3028_c0_g1;TRINITY_DN3457_c1_g1;TRINITY_DN3858_c0_g1;TRINITY_DN3920_c1_g2;TRINITY_DN3920_c1_g1;TRINITY_DN4310_c0_g4;TRINIT…
Mineral absorption	Digestive system	Organismal Systems	28	K14686;K01539;K04975;K13625;K01540;K12040;K14735;K14704;K00510;K01538;K14685;K07213;K14078;K14736;K04982;K08370;K14688;K14158;K00522;K14734;K14706;K08539;K14737;K14738;K04981;K05011;K14710;K05334	69	TRINITY_DN89_c2_g1;TRINITY_DN271_c0_g1;TRINITY_DN271_c0_g3;TRINITY_DN406_c0_g1;TRINITY_DN581_c0_g1;TRINITY_DN914_c1_g1;TRINITY_DN1382_c2_g1;TRINITY_DN1384_c0_g1;TRINITY_DN1329_c0_g1;TRINITY_DN2015_c2_g1;TRINITY_DN2025_c0_g1;TRINITY_DN2192_c0_g1;TRINITY_DN2148_c5_g1;TRINITY_DN2640_c3_g1;TRINITY_DN2655_c1_g1;TRINITY_DN2666_c1_g1;TRINITY_DN2784_c0_g1;TRINITY_DN2750_c0_g1;TRINITY_DN3094_c0_g1;TRINITY…
Cocaine addiction	Substance dependence	Human Diseases	32	K04630;K02090;K08045;K15839;K09048;K00274;K02580;K05214;K05212;K05211;K05198;K11828;K05870;K04345;K04450;K04735;K04374;K09047;K04632;K09029;K13765;K05213;K15494;K04355;K04605;K01593;K05208;K00501;K08155;K05036;K04144;K11716	69	TRINITY_DN653_c0_g2;TRINITY_DN769_c0_g1;TRINITY_DN1003_c1_g1;TRINITY_DN1010_c0_g1;TRINITY_DN1322_c0_g1;TRINITY_DN1322_c0_g2;TRINITY_DN1590_c0_g2;TRINITY_DN1609_c0_g1;TRINITY_DN1823_c0_g1;TRINITY_DN1823_c0_g2;TRINITY_DN1810_c1_g1;TRINITY_DN1805_c1_g1;TRINITY_DN2123_c1_g3;TRINITY_DN2123_c2_g1;TRINITY_DN2123_c1_g5;TRINITY_DN2123_c1_g4;TRINITY_DN2480_c5_g1;TRINITY_DN3270_c0_g1;TRINITY_DN3270_c0_g2;TR…
Linoleic acid metabolism	Lipid metabolism	Metabolism	11	K07418;K16343;K16342;K16817;K00460;K07424;K07413;K14621;K01047;K07415;K00454	68	TRINITY_DN663_c6_g1;TRINITY_DN636_c1_g2;TRINITY_DN636_c1_g1;TRINITY_DN1215_c4_g1;TRINITY_DN1215_c1_g1;TRINITY_DN1215_c0_g1;TRINITY_DN1676_c0_g1;TRINITY_DN2057_c1_g1;TRINITY_DN3106_c1_g1;TRINITY_DN3830_c2_g1;TRINITY_DN3956_c0_g1;TRINITY_DN3956_c2_g1;TRINITY_DN5425_c5_g1;TRINITY_DN5800_c0_g1;TRINITY_DN6021_c1_g1;TRINITY_DN6369_c1_g3;TRINITY_DN6369_c1_g2;TRINITY_DN6369_c1_g1;TRINITY_DN6369_c0_g1;TRI…
Vasopressin-regulated water reabsorption	Excretory system	Organismal Systems	28	K10426;K07887;K10424;K13502;K08046;K07904;K09048;K12462;K10414;K10416;K10413;K07905;K09876;K07889;K10415;K10428;K04648;K05870;K04345;K04228;K09047;K10417;K07888;K04632;K08043;K09866;K08049;K09865	68	TRINITY_DN159_c0_g1;TRINITY_DN124_c0_g1;TRINITY_DN404_c2_g1;TRINITY_DN716_c0_g1;TRINITY_DN956_c1_g1;TRINITY_DN1107_c1_g2;TRINITY_DN1322_c0_g1;TRINITY_DN1322_c0_g2;TRINITY_DN1354_c0_g1;TRINITY_DN1590_c0_g2;TRINITY_DN1604_c0_g1;TRINITY_DN1604_c0_g2;TRINITY_DN1810_c1_g1;TRINITY_DN2022_c0_g1;TRINITY_DN2022_c0_g2;TRINITY_DN2206_c0_g1;TRINITY_DN2206_c0_g2;TRINITY_DN2488_c4_g1;TRINITY_DN2917_c0_g1;TRINI…
Carbon fixation in photosynthetic organisms	Energy metabolism	Metabolism	21	K00134;K01623;K00615;K14455;K14454;K01783;K00927;K01807;K00025;K00026;K00029;K00814;K02446;K01803;K11645;K03841;K00024;K01595;K01610;K05298;K11214	67	TRINITY_DN236_c0_g1;TRINITY_DN376_c0_g1;TRINITY_DN643_c1_g1;TRINITY_DN709_c0_g1;TRINITY_DN931_c3_g1;TRINITY_DN1439_c0_g1;TRINITY_DN1666_c0_g1;TRINITY_DN3887_c0_g2;TRINITY_DN3970_c0_g1;TRINITY_DN4347_c1_g1;TRINITY_DN5408_c1_g1;TRINITY_DN5641_c0_g1;TRINITY_DN5641_c0_g2;TRINITY_DN7284_c0_g2;TRINITY_DN7599_c0_g1;TRINITY_DN13400_c1_g1;TRINITY_DN13895_c0_g3;TRINITY_DN13939_c0_g2;TRINITY_DN16666_c0_g4;T…
RNA polymerase	Transcription	Genetic Information Processing	27	K03010;K03026;K03022;K03006;K03016;K03005;K03024;K02999;K03021;K03009;K03004;K03015;K03000;K03008;K14721;K03023;K03025;K03013;K03018;K03011;K03019;K03002;K03012;K03043;K03046;K03040;K03027	66	TRINITY_DN55_c3_g2;TRINITY_DN307_c1_g1;TRINITY_DN688_c1_g1;TRINITY_DN890_c0_g1;TRINITY_DN890_c0_g3;TRINITY_DN1014_c0_g1;TRINITY_DN1156_c2_g1;TRINITY_DN1912_c1_g2;TRINITY_DN2195_c1_g1;TRINITY_DN2240_c1_g1;TRINITY_DN2258_c1_g1;TRINITY_DN3061_c0_g1;TRINITY_DN3126_c1_g1;TRINITY_DN4733_c1_g1;TRINITY_DN4735_c2_g1;TRINITY_DN4999_c10_g4;TRINITY_DN5496_c0_g1;TRINITY_DN5414_c0_g2;TRINITY_DN6937_c0_g1;TRINI…
Steroid hormone biosynthesis	Lipid metabolism	Metabolism	27	K13373;K07434;K00545;K05295;K00513;K07430;K00044;K01131;K13368;K00699;K00497;K07410;K00071;K07424;K07412;K07413;K12344;K00070;K00498;K01015;K10251;K15680;K12343;K07415;K07414;K12345;K00251	66	TRINITY_DN402_c0_g1;TRINITY_DN783_c2_g1;TRINITY_DN863_c0_g1;TRINITY_DN1097_c0_g1;TRINITY_DN1131_c0_g1;TRINITY_DN1482_c2_g1;TRINITY_DN1735_c1_g1;TRINITY_DN2761_c0_g1;TRINITY_DN2820_c1_g1;TRINITY_DN3289_c0_g1;TRINITY_DN3493_c0_g2;TRINITY_DN3785_c4_g1;TRINITY_DN4321_c0_g1;TRINITY_DN4331_c24_g1;TRINITY_DN4540_c5_g1;TRINITY_DN4540_c0_g1;TRINITY_DN4540_c0_g2;TRINITY_DN4940_c1_g2;TRINITY_DN4940_c1_g1;TR…
Dorso-ventral axis formation	Development	Organismal Systems	14	K02156;K03099;K04368;K02599;K02098;K02678;K07827;K02602;K04365;K04371;K03211;K04364;K02184;K04361	64	TRINITY_DN403_c0_g1;TRINITY_DN632_c0_g1;TRINITY_DN1216_c0_g1;TRINITY_DN1378_c0_g1;TRINITY_DN1422_c2_g1;TRINITY_DN1788_c0_g1;TRINITY_DN2183_c2_g1;TRINITY_DN2829_c0_g1;TRINITY_DN3172_c0_g1;TRINITY_DN3172_c0_g2;TRINITY_DN3183_c1_g2;TRINITY_DN3673_c1_g1;TRINITY_DN3879_c0_g1;TRINITY_DN4090_c0_g3;TRINITY_DN4168_c0_g1;TRINITY_DN4168_c0_g2;TRINITY_DN4538_c0_g1;TRINITY_DN4909_c1_g1;TRINITY_DN5396_c0_g2;TR…
Hippo signaling pathway - multiple species	Signal transduction	Environmental Information Processing	19	K09448;K16687;K08791;K09850;K04409;K16684;K16507;K04412;K16820;K16682;K08960;K16686;K06685;K16822;K09854;K09851;K16669;K16685;K16821	64	TRINITY_DN638_c3_g1;TRINITY_DN849_c0_g1;TRINITY_DN849_c0_g2;TRINITY_DN849_c0_g3;TRINITY_DN1691_c0_g1;TRINITY_DN1950_c0_g1;TRINITY_DN1950_c0_g2;TRINITY_DN1904_c2_g1;TRINITY_DN2018_c17_g1;TRINITY_DN2102_c0_g1;TRINITY_DN2285_c0_g1;TRINITY_DN2220_c1_g2;TRINITY_DN2451_c2_g1;TRINITY_DN2751_c0_g1;TRINITY_DN2839_c0_g1;TRINITY_DN2809_c0_g6;TRINITY_DN3700_c3_g1;TRINITY_DN3776_c0_g1;TRINITY_DN3776_c0_g2;TRI…
Type I diabetes mellitus	Endocrine and metabolic diseases	Human Diseases	14	K07817;K04383;K06752;K04077;K06751;K01580;K01353;K04390;K05413;K06470;K05412;K05406;K05468;K01294	64	TRINITY_DN10_c1_g1;TRINITY_DN645_c0_g1;TRINITY_DN645_c0_g2;TRINITY_DN1606_c0_g2;TRINITY_DN2185_c1_g1;TRINITY_DN2191_c2_g1;TRINITY_DN2396_c14_g1;TRINITY_DN2439_c0_g2;TRINITY_DN2543_c0_g2;TRINITY_DN2773_c1_g1;TRINITY_DN2773_c0_g1;TRINITY_DN2773_c0_g2;TRINITY_DN2857_c0_g1;TRINITY_DN3022_c0_g1;TRINITY_DN3019_c1_g1;TRINITY_DN3435_c0_g2;TRINITY_DN3435_c0_g1;TRINITY_DN3940_c0_g1;TRINITY_DN4509_c0_g1;TRI…
Biosynthesis of unsaturated fatty acids	Lipid metabolism	Metabolism	18	K00232;K01068;K07515;K00507;K07753;K07513;K10258;K10703;K10244;K10224;K10203;K10226;K10205;K10251;K17360;K01782;K10806;K01825	63	TRINITY_DN322_c7_g2;TRINITY_DN839_c0_g1;TRINITY_DN985_c2_g1;TRINITY_DN1390_c1_g1;TRINITY_DN1552_c6_g1;TRINITY_DN1856_c4_g1;TRINITY_DN1856_c1_g1;TRINITY_DN1946_c2_g1;TRINITY_DN1905_c2_g1;TRINITY_DN2700_c0_g1;TRINITY_DN3179_c0_g1;TRINITY_DN3413_c1_g1;TRINITY_DN3725_c1_g1;TRINITY_DN3757_c3_g1;TRINITY_DN4542_c0_g3;TRINITY_DN4567_c0_g1;TRINITY_DN4873_c0_g2;TRINITY_DN5335_c0_g1;TRINITY_DN5335_c0_g2;TRI…
Tyrosine metabolism	Amino acid metabolism	Metabolism	23	K00276;K00157;K14455;K00545;K14454;K00274;K00503;K00129;K01555;K13951;K00457;K00121;K07253;K00431;K00451;K00817;K00553;K00815;K01593;K00501;K02510;K01827;K18857	63	TRINITY_DN291_c0_g1;TRINITY_DN668_c1_g1;TRINITY_DN709_c0_g1;TRINITY_DN863_c0_g1;TRINITY_DN931_c3_g1;TRINITY_DN1609_c0_g1;TRINITY_DN2239_c0_g2;TRINITY_DN2690_c0_g1;TRINITY_DN3873_c0_g1;TRINITY_DN4044_c0_g1;TRINITY_DN4186_c0_g1;TRINITY_DN4572_c0_g2;TRINITY_DN4572_c0_g3;TRINITY_DN4768_c8_g1;TRINITY_DN5073_c2_g1;TRINITY_DN5060_c0_g1;TRINITY_DN5331_c0_g1;TRINITY_DN7284_c0_g2;TRINITY_DN8369_c0_g4;TRINI…
Aldosterone-regulated sodium reabsorption	Excretory system	Organismal Systems	23	K04527;K00922;K01539;K13302;K06276;K01540;K04827;K13359;K04825;K07827;K02649;K16172;K01538;K05459;K04371;K00071;K02677;K04824;K19663;K13305;K13358;K06644;K19662	62	TRINITY_DN164_c1_g1;TRINITY_DN152_c0_g2;TRINITY_DN271_c0_g1;TRINITY_DN271_c0_g3;TRINITY_DN283_c0_g1;TRINITY_DN779_c2_g1;TRINITY_DN914_c1_g1;TRINITY_DN906_c2_g1;TRINITY_DN1231_c0_g2;TRINITY_DN1204_c2_g1;TRINITY_DN1384_c0_g1;TRINITY_DN2127_c0_g1;TRINITY_DN2183_c2_g1;TRINITY_DN2148_c5_g1;TRINITY_DN2211_c0_g1;TRINITY_DN2666_c1_g1;TRINITY_DN2747_c2_g3;TRINITY_DN2784_c0_g1;TRINITY_DN2750_c0_g1;TRINITY_…
Staphylococcus aureus infection	Infectious diseases: Bacterial	Human Diseases	29	K04004;K01335;K03990;K03989;K06752;K01333;K01330;K04173;K03993;K04009;K12560;K01334;K03987;K06496;K06464;K04279;K03992;K06490;K03905;K03986;K05443;K03994;K06498;K04010;K04172;K01332;K03988;K07596;K01315	62	TRINITY_DN30_c0_g1;TRINITY_DN543_c0_g1;TRINITY_DN986_c0_g1;TRINITY_DN986_c0_g3;TRINITY_DN979_c0_g1;TRINITY_DN1606_c0_g2;TRINITY_DN1720_c0_g1;TRINITY_DN3029_c0_g1;TRINITY_DN3206_c0_g2;TRINITY_DN3440_c0_g1;TRINITY_DN3503_c7_g1;TRINITY_DN4605_c1_g1;TRINITY_DN4687_c0_g1;TRINITY_DN4802_c0_g1;TRINITY_DN5146_c2_g1;TRINITY_DN5698_c0_g1;TRINITY_DN5862_c0_g1;TRINITY_DN6055_c0_g1;TRINITY_DN6469_c0_g1;TRINIT…
Nuclear receptors	Protein families: signaling and cellular processes	Brite Hierarchies	41	K08561;K08557;K08549;K08532;K08547;K08548;K08535;K08536;K08528;K04465;K08562;K08362;K08560;K08556;K08534;K08552;K08543;K08544;K08551;K08027;K08531;K08553;K05547;K08558;K08533;K08539;K07294;K07292;K08550;K08527;K08037;K08563;K08540;K04504;K08559;K08546;K08529;K08537;K05771;K08545;K08554	61	TRINITY_DN929_c0_g1;TRINITY_DN904_c5_g1;TRINITY_DN1095_c1_g1;TRINITY_DN1302_c3_g1;TRINITY_DN1352_c0_g1;TRINITY_DN1352_c0_g2;TRINITY_DN1522_c0_g1;TRINITY_DN1522_c0_g2;TRINITY_DN1769_c0_g2;TRINITY_DN1778_c0_g1;TRINITY_DN1781_c1_g1;TRINITY_DN2036_c2_g1;TRINITY_DN2010_c0_g1;TRINITY_DN2180_c5_g1;TRINITY_DN2297_c0_g1;TRINITY_DN2281_c2_g1;TRINITY_DN2437_c0_g1;TRINITY_DN2496_c0_g1;TRINITY_DN3010_c0_g1;TR…
Malaria	Infectious diseases: Parasitic	Human Diseases	32	K04550;K13377;K05482;K16857;K14624;K13375;K13376;K04659;K05405;K05423;K06527;K05460;K05099;K06728;K06496;K06543;K06574;K06575;K06464;K10161;K16336;K10160;K06494;K06471;K06490;K05443;K06259;K03160;K05406;K06576;K06257;K03161	61	TRINITY_DN98_c1_g1;TRINITY_DN156_c1_g2;TRINITY_DN770_c0_g1;TRINITY_DN1044_c0_g1;TRINITY_DN1311_c1_g1;TRINITY_DN2147_c0_g1;TRINITY_DN3075_c0_g1;TRINITY_DN3246_c1_g1;TRINITY_DN3585_c0_g1;TRINITY_DN3651_c0_g1;TRINITY_DN3858_c1_g1;TRINITY_DN4259_c0_g1;TRINITY_DN4259_c0_g2;TRINITY_DN4511_c2_g1;TRINITY_DN4626_c0_g1;TRINITY_DN5553_c0_g1;TRINITY_DN6469_c0_g1;TRINITY_DN6967_c0_g1;TRINITY_DN7327_c0_g1;TRIN…
Circadian rhythm	Environmental adaptation	Organismal Systems	21	K03094;K09026;K03362;K03730;K10269;K02633;K03729;K02223;K08532;K03347;K08534;K08960;K03868;K02295;K07199;K07198;K05870;K08533;K02296;K08959;K07200	59	TRINITY_DN85_c0_g1;TRINITY_DN248_c0_g1;TRINITY_DN248_c0_g2;TRINITY_DN332_c1_g1;TRINITY_DN508_c0_g3;TRINITY_DN601_c0_g1;TRINITY_DN834_c0_g1;TRINITY_DN980_c0_g2;TRINITY_DN1194_c0_g2;TRINITY_DN1288_c0_g1;TRINITY_DN1200_c2_g1;TRINITY_DN1302_c3_g1;TRINITY_DN2283_c0_g1;TRINITY_DN2437_c0_g1;TRINITY_DN2612_c0_g1;TRINITY_DN2612_c0_g2;TRINITY_DN2809_c0_g6;TRINITY_DN3142_c0_g2;TRINITY_DN3916_c0_g1;TRINITY_D…
Fat digestion and absorption	Digestive system	Organismal Systems	21	K05641;K13509;K11155;K14455;K13885;K01080;K08757;K08760;K11160;K01047;K14462;K14457;K14073;K14074;K14461;K05683;K06259;K08750;K14075;K12298;K14452	59	TRINITY_DN372_c2_g1;TRINITY_DN414_c0_g3;TRINITY_DN547_c0_g1;TRINITY_DN709_c0_g1;TRINITY_DN1093_c2_g1;TRINITY_DN2221_c1_g2;TRINITY_DN2571_c0_g1;TRINITY_DN2659_c1_g1;TRINITY_DN2659_c0_g1;TRINITY_DN3999_c0_g1;TRINITY_DN5059_c1_g1;TRINITY_DN5279_c0_g4;TRINITY_DN5279_c0_g2;TRINITY_DN5462_c0_g1;TRINITY_DN6576_c1_g2;TRINITY_DN6639_c0_g1;TRINITY_DN7006_c0_g1;TRINITY_DN8695_c0_g1;TRINITY_DN9446_c0_g1;TRIN…
Prion diseases	Neurodegenerative diseases	Human Diseases	26	K04383;K04368;K04369;K02599;K03996;K09553;K09203;K09490;K04375;K04565;K05405;K04371;K06491;K05703;K03987;K04345;K05635;K03997;K02159;K03986;K03995;K12499;K03994;K03988;K04000;K03998	59	TRINITY_DN645_c0_g1;TRINITY_DN645_c0_g2;TRINITY_DN1216_c0_g1;TRINITY_DN1216_c0_g2;TRINITY_DN1378_c0_g1;TRINITY_DN1488_c2_g1;TRINITY_DN1531_c0_g1;TRINITY_DN2313_c1_g1;TRINITY_DN2732_c0_g1;TRINITY_DN2732_c0_g2;TRINITY_DN2734_c0_g1;TRINITY_DN3605_c0_g1;TRINITY_DN3651_c0_g1;TRINITY_DN4168_c0_g1;TRINITY_DN4168_c0_g2;TRINITY_DN5177_c2_g1;TRINITY_DN5649_c0_g2;TRINITY_DN5746_c3_g1;TRINITY_DN5829_c1_g3;TR…
Apoptosis - multiple species	Cell growth and death	Cellular Processes	24	K16060;K02561;K04726;K04725;K02187;K02373;K04440;K08334;K08738;K04570;K02161;K10586;K04397;K04398;K02084;K16943;K14021;K03158;K10131;K10132;K16061;K02159;K02583;K10522	59	TRINITY_DN111_c2_g1;TRINITY_DN264_c2_g2;TRINITY_DN1065_c1_g1;TRINITY_DN1148_c3_g1;TRINITY_DN1112_c1_g1;TRINITY_DN1155_c1_g1;TRINITY_DN1204_c1_g1;TRINITY_DN1558_c0_g1;TRINITY_DN1558_c0_g2;TRINITY_DN1759_c0_g1;TRINITY_DN1933_c0_g2;TRINITY_DN2158_c1_g1;TRINITY_DN2191_c6_g1;TRINITY_DN2608_c3_g1;TRINITY_DN2854_c0_g1;TRINITY_DN3068_c2_g1;TRINITY_DN3325_c2_g1;TRINITY_DN3576_c2_g1;TRINITY_DN3526_c0_g1;TR…
Mitophagy - yeast	Transport and catabolism	Cellular Processes	16	K00889;K08269;K03115;K04441;K08955;K17800;K03097;K08341;K17065;K11644;K11841;K07203;K02677;K11088;K02332;K17969	58	TRINITY_DN176_c2_g2;TRINITY_DN270_c0_g1;TRINITY_DN331_c0_g1;TRINITY_DN332_c0_g1;TRINITY_DN409_c0_g1;TRINITY_DN492_c1_g2;TRINITY_DN417_c0_g1;TRINITY_DN538_c1_g1;TRINITY_DN548_c0_g1;TRINITY_DN1059_c0_g1;TRINITY_DN1550_c0_g1;TRINITY_DN2160_c0_g1;TRINITY_DN2303_c0_g1;TRINITY_DN2303_c0_g3;TRINITY_DN2897_c0_g1;TRINITY_DN3042_c0_g1;TRINITY_DN3680_c0_g1;TRINITY_DN3680_c0_g2;TRINITY_DN4158_c2_g1;TRINITY_D…
Inflammatory bowel disease (IBD)	Immune diseases	Human Diseases	33	K10168;K13377;K04383;K05482;K04500;K04446;K08532;K06752;K02580;K11225;K08534;K05070;K05133;K09035;K10163;K13375;K13376;K05405;K05132;K04692;K05071;K04735;K05064;K10160;K11222;K10166;K10165;K05063;K05443;K05075;K05494;K05406;K05065	58	TRINITY_DN118_c1_g1;TRINITY_DN156_c1_g2;TRINITY_DN645_c0_g1;TRINITY_DN645_c0_g2;TRINITY_DN770_c0_g1;TRINITY_DN1102_c0_g2;TRINITY_DN1102_c1_g3;TRINITY_DN1102_c1_g2;TRINITY_DN1102_c1_g1;TRINITY_DN1222_c1_g1;TRINITY_DN1302_c3_g1;TRINITY_DN1467_c1_g1;TRINITY_DN1606_c0_g2;TRINITY_DN1823_c0_g1;TRINITY_DN1823_c0_g2;TRINITY_DN1840_c0_g1;TRINITY_DN2437_c0_g1;TRINITY_DN2425_c0_g1;TRINITY_DN2617_c1_g1;TRINI…
Autoimmune thyroid disease	Immune diseases	Human Diseases	15	K06752;K06751;K01353;K04390;K05413;K05414;K06470;K00431;K04249;K05443;K03160;K05412;K05251;K10809;K03161	57	TRINITY_DN1606_c0_g2;TRINITY_DN2396_c14_g1;TRINITY_DN2543_c0_g2;TRINITY_DN2773_c1_g1;TRINITY_DN2773_c0_g1;TRINITY_DN2773_c0_g2;TRINITY_DN2857_c0_g1;TRINITY_DN3022_c0_g1;TRINITY_DN3019_c1_g1;TRINITY_DN3435_c0_g2;TRINITY_DN3435_c0_g1;TRINITY_DN3940_c0_g1;TRINITY_DN4509_c0_g1;TRINITY_DN4805_c0_g1;TRINITY_DN5146_c2_g1;TRINITY_DN5177_c0_g1;TRINITY_DN5346_c0_g1;TRINITY_DN5655_c0_g1;TRINITY_DN7645_c1_g1…
Other glycan degradation	Glycan biosynthesis and metabolism	Metabolism	15	K12311;K12373;K12309;K01444;K12312;K12357;K14459;K01206;K01191;K01227;K01192;K01201;K01190;K01186;K12112	57	TRINITY_DN86_c2_g1;TRINITY_DN739_c0_g1;TRINITY_DN740_c1_g1;TRINITY_DN951_c0_g2;TRINITY_DN973_c0_g1;TRINITY_DN973_c0_g2;TRINITY_DN1484_c0_g1;TRINITY_DN1770_c0_g1;TRINITY_DN1895_c0_g1;TRINITY_DN2592_c7_g1;TRINITY_DN2741_c2_g4;TRINITY_DN2810_c0_g1;TRINITY_DN3198_c4_g1;TRINITY_DN3390_c2_g1;TRINITY_DN3351_c0_g1;TRINITY_DN3351_c0_g3;TRINITY_DN3718_c0_g1;TRINITY_DN4600_c0_g1;TRINITY_DN4677_c2_g1;TRINITY…
Base excision repair	Replication and repair	Genetic Information Processing	31	K10801;K02324;K03512;K04802;K02327;K10747;K03660;K03652;K10798;K02328;K02330;K03575;K03648;K03649;K10567;K10802;K02325;K10803;K04799;K02326;K10800;K10568;K01972;K10563;K10772;K10569;K03506;K05522;K01151;K03505;K10776	56	TRINITY_DN55_c2_g2;TRINITY_DN326_c0_g1;TRINITY_DN498_c0_g2;TRINITY_DN795_c0_g1;TRINITY_DN1127_c0_g1;TRINITY_DN1709_c0_g1;TRINITY_DN1828_c0_g1;TRINITY_DN2286_c0_g1;TRINITY_DN2625_c0_g1;TRINITY_DN2920_c0_g1;TRINITY_DN3169_c0_g1;TRINITY_DN3183_c0_g1;TRINITY_DN3438_c1_g1;TRINITY_DN3510_c0_g1;TRINITY_DN4042_c0_g1;TRINITY_DN4493_c0_g2;TRINITY_DN4741_c0_g1;TRINITY_DN5070_c0_g1;TRINITY_DN5399_c0_g1;TRINI…
Two-component system	Signal transduction	Environmental Information Processing	33	K01077;K08738;K00626;K00413;K02259;K00027;K00411;K07664;K18326;K05875;K07803;K07660;K01644;K05966;K07806;K10003;K02478;K02488;K01547;K01546;K01548;K00990;K06080;K07789;K07788;K07799;K00247;K11103;K00425;K03563;K02403;K02313;K00410	56	TRINITY_DN794_c0_g1;TRINITY_DN1933_c0_g2;TRINITY_DN2289_c0_g1;TRINITY_DN2379_c0_g1;TRINITY_DN2854_c0_g1;TRINITY_DN4353_c0_g2;TRINITY_DN7157_c0_g5;TRINITY_DN10044_c0_g1;TRINITY_DN10171_c0_g1;TRINITY_DN10225_c13_g1;TRINITY_DN16657_c4_g1;TRINITY_DN17203_c0_g7;TRINITY_DN17203_c0_g3;TRINITY_DN19555_c0_g1;TRINITY_DN20301_c0_g14;TRINITY_DN20450_c0_g1;TRINITY_DN22941_c0_g5;TRINITY_DN22941_c0_g3;TRINITY_D…
Two-component system	Protein families: signaling and cellular processes	Brite Hierarchies	33	K01077;K08738;K00626;K00413;K02259;K00027;K00411;K07664;K18326;K05875;K07803;K07660;K01644;K05966;K07806;K10003;K02478;K02488;K01547;K01546;K01548;K00990;K06080;K07789;K07788;K07799;K00247;K11103;K00425;K03563;K02403;K02313;K00410	56	TRINITY_DN794_c0_g1;TRINITY_DN1933_c0_g2;TRINITY_DN2289_c0_g1;TRINITY_DN2379_c0_g1;TRINITY_DN2854_c0_g1;TRINITY_DN4353_c0_g2;TRINITY_DN7157_c0_g5;TRINITY_DN10044_c0_g1;TRINITY_DN10171_c0_g1;TRINITY_DN10225_c13_g1;TRINITY_DN16657_c4_g1;TRINITY_DN17203_c0_g7;TRINITY_DN17203_c0_g3;TRINITY_DN19555_c0_g1;TRINITY_DN20301_c0_g14;TRINITY_DN20450_c0_g1;TRINITY_DN22941_c0_g5;TRINITY_DN22941_c0_g3;TRINITY_D…
Ascorbate and aldarate metabolism	Carbohydrate metabolism	Metabolism	17	K00128;K00012;K00699;K14085;K00149;K00103;K01053;K00469;K14190;K08092;K18981;K01630;K03079;K03475;K03078;K03476;K03077	55	TRINITY_DN47_c0_g1;TRINITY_DN2226_c12_g1;TRINITY_DN3142_c1_g1;TRINITY_DN3785_c4_g1;TRINITY_DN4157_c0_g1;TRINITY_DN4540_c5_g1;TRINITY_DN4540_c0_g1;TRINITY_DN4540_c0_g2;TRINITY_DN4760_c0_g2;TRINITY_DN4760_c0_g3;TRINITY_DN7576_c0_g1;TRINITY_DN7605_c0_g1;TRINITY_DN7873_c0_g1;TRINITY_DN8548_c0_g1;TRINITY_DN11260_c10_g1;TRINITY_DN11950_c0_g1;TRINITY_DN13798_c4_g1;TRINITY_DN16481_c1_g1;TRINITY_DN18476_c…
Mismatch repair	Replication and repair	Genetic Information Processing	25	K08737;K04802;K10754;K02327;K10747;K07466;K10756;K08734;K03111;K10755;K02328;K08739;K08735;K08736;K01972;K10740;K03601;K10739;K03555;K03573;K10858;K03572;K10857;K10746;K03505	53	TRINITY_DN661_c1_g1;TRINITY_DN795_c0_g1;TRINITY_DN1145_c0_g1;TRINITY_DN1127_c0_g1;TRINITY_DN1709_c0_g1;TRINITY_DN2168_c1_g1;TRINITY_DN2181_c1_g1;TRINITY_DN2251_c1_g3;TRINITY_DN2251_c1_g2;TRINITY_DN2278_c0_g1;TRINITY_DN2608_c0_g2;TRINITY_DN2745_c4_g1;TRINITY_DN3091_c3_g1;TRINITY_DN3169_c0_g1;TRINITY_DN4200_c0_g1;TRINITY_DN4200_c0_g3;TRINITY_DN4306_c0_g1;TRINITY_DN4558_c0_g2;TRINITY_DN4788_c1_g1;TR…
Thyroid cancer	Cancers: Specific types	Human Diseases	26	K02833;K09291;K10140;K06625;K02620;K04491;K04377;K04368;K04369;K09293;K03511;K04402;K09288;K05689;K09289;K07827;K09292;K04365;K04451;K04371;K04503;K14021;K02159;K03176;K04490;K04492	52	TRINITY_DN203_c0_g3;TRINITY_DN330_c0_g1;TRINITY_DN346_c1_g1;TRINITY_DN543_c0_g2;TRINITY_DN876_c1_g1;TRINITY_DN895_c0_g1;TRINITY_DN939_c0_g2;TRINITY_DN1216_c0_g1;TRINITY_DN1216_c0_g2;TRINITY_DN1363_c0_g1;TRINITY_DN1552_c1_g1;TRINITY_DN1758_c1_g1;TRINITY_DN1716_c0_g1;TRINITY_DN1768_c13_g1;TRINITY_DN1808_c4_g1;TRINITY_DN1900_c1_g1;TRINITY_DN2052_c0_g1;TRINITY_DN2183_c2_g1;TRINITY_DN2156_c0_g1;TRINIT…
Pantothenate and CoA biosynthesis	Metabolism of cofactors and vitamins	Metabolism	19	K09680;K02318;K01513;K08069;K06133;K00826;K01464;K13038;K01922;K01598;K00867;K08682;K00606;K00207;K01431;K18966;K00053;K01687;K01918	52	TRINITY_DN413_c0_g1;TRINITY_DN948_c0_g1;TRINITY_DN1189_c3_g1;TRINITY_DN2346_c0_g3;TRINITY_DN2671_c1_g1;TRINITY_DN3948_c0_g1;TRINITY_DN4255_c0_g1;TRINITY_DN4925_c5_g1;TRINITY_DN5026_c0_g1;TRINITY_DN5586_c0_g1;TRINITY_DN6140_c0_g1;TRINITY_DN6140_c0_g2;TRINITY_DN9354_c1_g1;TRINITY_DN9843_c0_g4;TRINITY_DN9843_c0_g1;TRINITY_DN12909_c0_g2;TRINITY_DN14574_c0_g2;TRINITY_DN14574_c0_g8;TRINITY_DN14958_c0_g…
DNA replication	Replication and repair	Genetic Information Processing	30	K02324;K04802;K10754;K02327;K02210;K10747;K07466;K10756;K03111;K10755;K02328;K10742;K10744;K02542;K02540;K02325;K02209;K04799;K02326;K02212;K01972;K02541;K10740;K10739;K10743;K03506;K02320;K03505;K03469;K02684	52	TRINITY_DN326_c0_g1;TRINITY_DN795_c0_g1;TRINITY_DN1145_c0_g1;TRINITY_DN1127_c0_g1;TRINITY_DN1362_c0_g1;TRINITY_DN1709_c0_g1;TRINITY_DN2168_c1_g1;TRINITY_DN2181_c1_g1;TRINITY_DN2251_c1_g3;TRINITY_DN2251_c1_g2;TRINITY_DN2608_c0_g2;TRINITY_DN3091_c3_g1;TRINITY_DN3169_c0_g1;TRINITY_DN3382_c0_g1;TRINITY_DN3816_c0_g1;TRINITY_DN3816_c0_g2;TRINITY_DN4301_c0_g3;TRINITY_DN4558_c0_g2;TRINITY_DN4663_c0_g1;TR…
Fatty acid elongation	Lipid metabolism	Metabolism	20	K01074;K01068;K10247;K07515;K00022;K07509;K10258;K10703;K10244;K07511;K10203;K07512;K07508;K10205;K10251;K17360;K10249;K10250;K16339;K10248	51	TRINITY_DN414_c0_g1;TRINITY_DN839_c0_g1;TRINITY_DN870_c0_g1;TRINITY_DN985_c2_g1;TRINITY_DN1552_c6_g1;TRINITY_DN1691_c3_g1;TRINITY_DN1691_c3_g2;TRINITY_DN1834_c1_g1;TRINITY_DN2173_c1_g1;TRINITY_DN2700_c0_g1;TRINITY_DN3179_c0_g1;TRINITY_DN3413_c1_g1;TRINITY_DN4749_c1_g1;TRINITY_DN5335_c0_g1;TRINITY_DN5335_c0_g2;TRINITY_DN5460_c0_g1;TRINITY_DN5676_c1_g1;TRINITY_DN6534_c4_g1;TRINITY_DN6845_c0_g1;TRIN…
One carbon pool by folate	Metabolism of cofactors and vitamins	Metabolism	18	K00288;K01934;K00560;K00548;K00289;K00600;K11787;K00297;K13403;K00602;K13990;K00604;K01433;K01491;K13402;K13938;K00605;K08289	50	TRINITY_DN9_c0_g1;TRINITY_DN1416_c0_g1;TRINITY_DN1790_c0_g3;TRINITY_DN3314_c0_g4;TRINITY_DN3314_c0_g1;TRINITY_DN3314_c0_g3;TRINITY_DN5466_c0_g1;TRINITY_DN5934_c0_g2;TRINITY_DN6024_c0_g1;TRINITY_DN6174_c0_g1;TRINITY_DN6605_c0_g2;TRINITY_DN6724_c0_g1;TRINITY_DN8674_c4_g1;TRINITY_DN10879_c0_g1;TRINITY_DN11833_c0_g1;TRINITY_DN11833_c0_g2;TRINITY_DN14537_c0_g1;TRINITY_DN15080_c0_g1;TRINITY_DN16390_c0_…
Arginine biosynthesis	Amino acid metabolism	Metabolism	16	K14455;K01476;K14454;K14677;K01425;K13241;K00261;K01940;K00814;K01755;K00611;K14260;K13240;K01948;K11067;K01438	50	TRINITY_DN709_c0_g1;TRINITY_DN901_c1_g1;TRINITY_DN931_c3_g1;TRINITY_DN1878_c0_g1;TRINITY_DN2161_c6_g1;TRINITY_DN3647_c0_g2;TRINITY_DN3731_c0_g1;TRINITY_DN4110_c1_g1;TRINITY_DN4602_c0_g1;TRINITY_DN5404_c1_g1;TRINITY_DN5661_c1_g1;TRINITY_DN6689_c0_g1;TRINITY_DN6689_c0_g2;TRINITY_DN7284_c0_g2;TRINITY_DN7542_c0_g1;TRINITY_DN7599_c0_g1;TRINITY_DN9191_c0_g1;TRINITY_DN9191_c0_g2;TRINITY_DN11249_c6_g1;TR…
Protein export	Folding, sorting and degradation	Genetic Information Processing	23	K03106;K12275;K09540;K03107;K12946;K12272;K03109;K13431;K09490;K07342;K03217;K12947;K09647;K10956;K03105;K03108;K12948;K09648;K03101;K03070;K13280;K03104;K09481	50	TRINITY_DN88_c0_g1;TRINITY_DN629_c0_g1;TRINITY_DN963_c0_g1;TRINITY_DN961_c0_g2;TRINITY_DN1611_c0_g2;TRINITY_DN1873_c1_g1;TRINITY_DN2041_c1_g1;TRINITY_DN2557_c0_g1;TRINITY_DN2732_c0_g1;TRINITY_DN2732_c0_g2;TRINITY_DN3037_c2_g2;TRINITY_DN3037_c2_g1;TRINITY_DN3165_c1_g2;TRINITY_DN3165_c1_g1;TRINITY_DN3210_c0_g1;TRINITY_DN3210_c0_g2;TRINITY_DN3469_c1_g1;TRINITY_DN4478_c2_g1;TRINITY_DN4421_c0_g1;TRINI…
Steroid biosynthesis	Lipid metabolism	Metabolism	17	K01824;K00222;K13373;K01852;K00227;K00637;K07750;K00213;K00511;K07748;K09828;K00801;K07438;K07419;K07436;K05917;K12298	48	TRINITY_DN0_c6_g1;TRINITY_DN211_c0_g1;TRINITY_DN402_c0_g1;TRINITY_DN776_c0_g1;TRINITY_DN1023_c0_g2;TRINITY_DN1653_c0_g1;TRINITY_DN1653_c0_g2;TRINITY_DN2367_c1_g2;TRINITY_DN2405_c10_g1;TRINITY_DN2458_c0_g1;TRINITY_DN2761_c0_g1;TRINITY_DN2868_c0_g1;TRINITY_DN3004_c1_g1;TRINITY_DN4207_c2_g1;TRINITY_DN4262_c2_g2;TRINITY_DN4331_c24_g1;TRINITY_DN5243_c1_g3;TRINITY_DN5243_c1_g2;TRINITY_DN5243_c1_g1;TRIN…
Phototransduction - fly	Sensory system	Organismal Systems	12	K04634;K00910;K13806;K04515;K05858;K04958;K05692;K08834;K13807;K02677;K02183;K04967	47	TRINITY_DN22_c0_g3;TRINITY_DN485_c1_g1;TRINITY_DN1467_c3_g1;TRINITY_DN1467_c2_g1;TRINITY_DN1927_c0_g1;TRINITY_DN2197_c0_g2;TRINITY_DN3259_c0_g1;TRINITY_DN3250_c0_g1;TRINITY_DN3250_c0_g3;TRINITY_DN4000_c0_g1;TRINITY_DN4071_c0_g1;TRINITY_DN4230_c0_g2;TRINITY_DN4526_c0_g1;TRINITY_DN4526_c0_g2;TRINITY_DN6051_c1_g2;TRINITY_DN6596_c0_g2;TRINITY_DN6637_c0_g1;TRINITY_DN7325_c0_g3;TRINITY_DN9172_c0_g1;TRI…
Butanoate metabolism	Carbohydrate metabolism	Metabolism	20	K01896;K07515;K01027;K00248;K00022;K00626;K01580;K07514;K00019;K01641;K07511;K01907;K00109;K01640;K01782;K04073;K00247;K01825;K00239;K13524	47	TRINITY_DN674_c0_g1;TRINITY_DN985_c2_g1;TRINITY_DN1050_c0_g2;TRINITY_DN1465_c1_g1;TRINITY_DN1613_c0_g1;TRINITY_DN1691_c3_g1;TRINITY_DN1691_c3_g2;TRINITY_DN2289_c0_g1;TRINITY_DN2439_c0_g2;TRINITY_DN2537_c4_g1;TRINITY_DN2583_c0_g2;TRINITY_DN4220_c0_g1;TRINITY_DN4299_c0_g1;TRINITY_DN4353_c0_g2;TRINITY_DN4394_c0_g1;TRINITY_DN4749_c1_g1;TRINITY_DN5619_c0_g1;TRINITY_DN6443_c0_g1;TRINITY_DN10225_c13_g1;…
Collecting duct acid secretion	Excretory system	Organismal Systems	16	K02149;K02154;K13627;K02147;K02148;K02145;K02150;K02146;K01542;K02155;K02153;K06573;K02151;K02152;K18245;K01543	47	TRINITY_DN784_c0_g1;TRINITY_DN775_c0_g1;TRINITY_DN775_c0_g2;TRINITY_DN775_c0_g3;TRINITY_DN867_c1_g1;TRINITY_DN1088_c0_g1;TRINITY_DN1125_c1_g1;TRINITY_DN1235_c6_g1;TRINITY_DN1723_c0_g1;TRINITY_DN1723_c0_g2;TRINITY_DN1884_c1_g1;TRINITY_DN2185_c4_g1;TRINITY_DN2563_c1_g3;TRINITY_DN3241_c16_g1;TRINITY_DN3761_c14_g1;TRINITY_DN4887_c2_g1;TRINITY_DN5760_c2_g1;TRINITY_DN5899_c7_g1;TRINITY_DN6086_c0_g4;TRI…
Graft-versus-host disease	Immune diseases	Human Diseases	10	K04383;K06752;K06751;K01353;K04390;K05405;K05413;K06470;K05412;K06516	46	TRINITY_DN645_c0_g1;TRINITY_DN645_c0_g2;TRINITY_DN1606_c0_g2;TRINITY_DN2396_c14_g1;TRINITY_DN2543_c0_g2;TRINITY_DN2773_c1_g1;TRINITY_DN2773_c0_g1;TRINITY_DN2773_c0_g2;TRINITY_DN2857_c0_g1;TRINITY_DN3022_c0_g1;TRINITY_DN3019_c1_g1;TRINITY_DN3435_c0_g2;TRINITY_DN3435_c0_g1;TRINITY_DN3651_c0_g1;TRINITY_DN3940_c0_g1;TRINITY_DN4509_c0_g1;TRINITY_DN4805_c0_g1;TRINITY_DN5146_c2_g1;TRINITY_DN5177_c0_g1;T…
Intestinal immune network for IgA production	Immune system	Organismal Systems	27	K13073;K04185;K03159;K06752;K05433;K05476;K13375;K05405;K05475;K05074;K06710;K05413;K06483;K05153;K13072;K05513;K06470;K06590;K05443;K04466;K03160;K05412;K05151;K06713;K05150;K04184;K03161	46	TRINITY_DN127_c0_g5;TRINITY_DN365_c0_g2;TRINITY_DN1108_c0_g1;TRINITY_DN1606_c0_g2;TRINITY_DN2229_c1_g1;TRINITY_DN2344_c0_g1;TRINITY_DN3075_c0_g1;TRINITY_DN3651_c0_g1;TRINITY_DN3737_c0_g1;TRINITY_DN3708_c1_g1;TRINITY_DN4187_c3_g1;TRINITY_DN4676_c0_g3;TRINITY_DN4805_c0_g1;TRINITY_DN4800_c0_g4;TRINITY_DN4800_c0_g5;TRINITY_DN4800_c0_g2;TRINITY_DN4800_c0_g3;TRINITY_DN5146_c2_g1;TRINITY_DN5419_c0_g1;TR…
Allograft rejection	Immune diseases	Human Diseases	11	K06752;K06751;K01353;K04390;K05413;K06470;K05443;K03160;K05412;K05406;K03161	46	TRINITY_DN1606_c0_g2;TRINITY_DN2396_c14_g1;TRINITY_DN2543_c0_g2;TRINITY_DN2773_c1_g1;TRINITY_DN2773_c0_g1;TRINITY_DN2773_c0_g2;TRINITY_DN2857_c0_g1;TRINITY_DN3022_c0_g1;TRINITY_DN3019_c1_g1;TRINITY_DN3435_c0_g2;TRINITY_DN3435_c0_g1;TRINITY_DN3940_c0_g1;TRINITY_DN4509_c0_g1;TRINITY_DN4805_c0_g1;TRINITY_DN5146_c2_g1;TRINITY_DN5177_c0_g1;TRINITY_DN5655_c0_g1;TRINITY_DN7645_c1_g1;TRINITY_DN8577_c0_g1…
Secretion system	Protein families: signaling and cellular processes	Brite Hierarchies	22	K03106;K12275;K09540;K03107;K12272;K03109;K13431;K07342;K03217;K01493;K10956;K03105;K03108;K12678;K04336;K03070;K07346;K02454;K02452;K03104;K09481;K12539	46	TRINITY_DN88_c0_g1;TRINITY_DN629_c0_g1;TRINITY_DN963_c0_g1;TRINITY_DN961_c0_g2;TRINITY_DN1873_c1_g1;TRINITY_DN2041_c1_g1;TRINITY_DN2557_c0_g1;TRINITY_DN3037_c2_g2;TRINITY_DN3037_c2_g1;TRINITY_DN3165_c1_g2;TRINITY_DN3165_c1_g1;TRINITY_DN3372_c1_g1;TRINITY_DN4478_c2_g1;TRINITY_DN4421_c0_g1;TRINITY_DN5057_c0_g1;TRINITY_DN5208_c3_g1;TRINITY_DN5997_c0_g1;TRINITY_DN8579_c0_g1;TRINITY_DN8624_c2_g1;TRINI…
Proximal tubule bicarbonate reclamation	Excretory system	Organismal Systems	14	K01539;K01540;K12040;K13576;K01596;K01425;K01538;K18246;K00025;K13575;K09864;K00261;K13577;K18245	45	TRINITY_DN271_c0_g1;TRINITY_DN271_c0_g3;TRINITY_DN914_c1_g1;TRINITY_DN1382_c2_g1;TRINITY_DN1384_c0_g1;TRINITY_DN1819_c0_g2;TRINITY_DN1819_c0_g1;TRINITY_DN1905_c0_g1;TRINITY_DN1905_c2_g2;TRINITY_DN2161_c6_g1;TRINITY_DN2148_c5_g1;TRINITY_DN2666_c1_g1;TRINITY_DN2784_c0_g1;TRINITY_DN2750_c0_g1;TRINITY_DN3349_c0_g1;TRINITY_DN3647_c0_g2;TRINITY_DN3970_c0_g1;TRINITY_DN6170_c1_g1;TRINITY_DN6221_c0_g1;TRI…
Terpenoid backbone biosynthesis	Metabolism of terpenoids and polyketides	Metabolism	24	K00804;K08658;K00787;K19177;K00626;K00869;K12504;K06013;K01641;K11778;K12505;K13273;K05955;K05906;K00021;K01597;K03526;K03527;K01662;K00587;K00919;K00991;K05954;K01823	45	TRINITY_DN53_c1_g1;TRINITY_DN784_c1_g1;TRINITY_DN943_c0_g1;TRINITY_DN1189_c0_g1;TRINITY_DN1189_c0_g2;TRINITY_DN2036_c1_g1;TRINITY_DN2289_c0_g1;TRINITY_DN2855_c1_g1;TRINITY_DN2879_c0_g1;TRINITY_DN4101_c0_g1;TRINITY_DN4299_c0_g1;TRINITY_DN4353_c0_g2;TRINITY_DN4740_c0_g1;TRINITY_DN5523_c0_g1;TRINITY_DN6504_c0_g1;TRINITY_DN7291_c1_g1;TRINITY_DN7748_c2_g1;TRINITY_DN10225_c13_g1;TRINITY_DN11241_c2_g1;T…
alpha-Linolenic acid metabolism	Lipid metabolism	Metabolism	11	K00232;K16343;K07513;K16342;K16817;K10226;K14621;K01047;K00632;K00454;K18857	45	TRINITY_DN322_c7_g2;TRINITY_DN1390_c1_g1;TRINITY_DN1676_c0_g1;TRINITY_DN1905_c2_g1;TRINITY_DN2057_c1_g1;TRINITY_DN3106_c1_g1;TRINITY_DN3830_c2_g1;TRINITY_DN3956_c0_g1;TRINITY_DN3956_c2_g1;TRINITY_DN4542_c0_g3;TRINITY_DN4567_c0_g1;TRINITY_DN6609_c0_g1;TRINITY_DN8154_c0_g1;TRINITY_DN8447_c0_g1;TRINITY_DN8695_c0_g1;TRINITY_DN10123_c0_g2;TRINITY_DN10571_c2_g2;TRINITY_DN14276_c1_g1;TRINITY_DN16426_c0_…
Phenylalanine metabolism	Amino acid metabolism	Metabolism	23	K00276;K14455;K14454;K00274;K00129;K00457;K00500;K07253;K00285;K00529;K05709;K05711;K05710;K00817;K15517;K00628;K05712;K04073;K05714;K01666;K00815;K01593;K03782	44	TRINITY_DN291_c0_g1;TRINITY_DN709_c0_g1;TRINITY_DN931_c3_g1;TRINITY_DN1609_c0_g1;TRINITY_DN2239_c0_g2;TRINITY_DN3873_c0_g1;TRINITY_DN4044_c0_g1;TRINITY_DN4572_c0_g2;TRINITY_DN4572_c0_g3;TRINITY_DN5060_c0_g1;TRINITY_DN7284_c0_g2;TRINITY_DN8272_c0_g3;TRINITY_DN8694_c0_g1;TRINITY_DN11146_c0_g1;TRINITY_DN18468_c0_g3;TRINITY_DN20024_c0_g7;TRINITY_DN20024_c0_g2;TRINITY_DN20024_c0_g3;TRINITY_DN20024_c0_…
Selenocompound metabolism	Metabolism of other amino acids	Metabolism	14	K01874;K00816;K10837;K01008;K00548;K00384;K01763;K03341;K01758;K00562;K01042;K11717;K00549;K00956	44	TRINITY_DN40_c0_g1;TRINITY_DN110_c3_g1;TRINITY_DN1365_c0_g2;TRINITY_DN1980_c0_g1;TRINITY_DN2867_c0_g2;TRINITY_DN3314_c0_g4;TRINITY_DN3314_c0_g1;TRINITY_DN3314_c0_g3;TRINITY_DN4170_c2_g1;TRINITY_DN4963_c0_g1;TRINITY_DN7207_c0_g1;TRINITY_DN7907_c1_g1;TRINITY_DN8369_c0_g5;TRINITY_DN8750_c0_g1;TRINITY_DN10401_c1_g1;TRINITY_DN14307_c0_g1;TRINITY_DN14307_c0_g2;TRINITY_DN16489_c1_g1;TRINITY_DN17232_c0_g…
Glycosylphosphatidylinositol (GPI)-anchor biosynthesis	Glycan biosynthesis and metabolism	Metabolism	23	K01127;K03434;K05283;K03861;K05310;K05286;K05291;K05294;K03859;K05292;K07542;K03860;K05285;K11001;K09658;K07541;K03857;K05293;K05289;K05290;K05288;K03858;K08098	44	TRINITY_DN302_c0_g1;TRINITY_DN746_c0_g1;TRINITY_DN1347_c1_g1;TRINITY_DN1907_c0_g1;TRINITY_DN2465_c0_g1;TRINITY_DN3244_c1_g1;TRINITY_DN3436_c0_g2;TRINITY_DN3484_c0_g1;TRINITY_DN3574_c0_g1;TRINITY_DN4009_c0_g1;TRINITY_DN4022_c0_g1;TRINITY_DN5051_c1_g2;TRINITY_DN5454_c0_g1;TRINITY_DN5840_c2_g1;TRINITY_DN5831_c1_g1;TRINITY_DN7373_c0_g1;TRINITY_DN8247_c0_g1;TRINITY_DN8746_c0_g1;TRINITY_DN9450_c0_g1;TR…
Folate biosynthesis	Metabolism of cofactors and vitamins	Metabolism	20	K01737;K01077;K00072;K03635;K00079;K01930;K00011;K15631;K01724;K03639;K01307;K00500;K01495;K00502;K01497;K00357;K13938;K00501;K15376;K06879	43	TRINITY_DN428_c0_g1;TRINITY_DN794_c0_g1;TRINITY_DN1075_c0_g1;TRINITY_DN1321_c1_g1;TRINITY_DN1529_c0_g1;TRINITY_DN2183_c0_g1;TRINITY_DN2446_c0_g1;TRINITY_DN2601_c0_g1;TRINITY_DN4007_c0_g1;TRINITY_DN4135_c1_g1;TRINITY_DN4239_c3_g1;TRINITY_DN5043_c5_g1;TRINITY_DN5450_c0_g1;TRINITY_DN5450_c0_g3;TRINITY_DN5421_c0_g1;TRINITY_DN5581_c0_g1;TRINITY_DN5774_c0_g1;TRINITY_DN8272_c0_g3;TRINITY_DN8477_c0_g6;TR…
Carbon fixation pathways in prokaryotes	Energy metabolism	Metabolism	20	K01895;K00626;K01958;K01681;K00297;K00031;K01648;K01679;K01847;K01491;K01676;K01963;K01903;K00024;K05606;K01595;K00247;K15019;K01962;K00239	43	TRINITY_DN116_c0_g1;TRINITY_DN116_c0_g3;TRINITY_DN2289_c0_g1;TRINITY_DN3306_c0_g1;TRINITY_DN4353_c0_g2;TRINITY_DN5030_c0_g1;TRINITY_DN6605_c0_g2;TRINITY_DN8061_c0_g2;TRINITY_DN9362_c6_g1;TRINITY_DN10225_c13_g1;TRINITY_DN10651_c0_g1;TRINITY_DN12138_c0_g1;TRINITY_DN14965_c0_g2;TRINITY_DN15557_c0_g1;TRINITY_DN16657_c4_g1;TRINITY_DN22264_c0_g1;TRINITY_DN25422_c0_g1;TRINITY_DN25422_c0_g2;TRINITY_DN298…
Other types of O-glycan biosynthesis	Glycan biosynthesis and metabolism	Metabolism	15	K11703;K13646;K09667;K00779;K07966;K00728;K18134;K00781;K13675;K13676;K05948;K00778;K03691;K07968;K13667	43	TRINITY_DN29_c3_g1;TRINITY_DN99_c0_g4;TRINITY_DN277_c0_g1;TRINITY_DN395_c3_g1;TRINITY_DN580_c0_g1;TRINITY_DN1073_c1_g1;TRINITY_DN1101_c0_g1;TRINITY_DN1282_c1_g1;TRINITY_DN1784_c0_g1;TRINITY_DN1891_c1_g4;TRINITY_DN1996_c1_g1;TRINITY_DN1981_c0_g1;TRINITY_DN5153_c0_g1;TRINITY_DN5196_c1_g2;TRINITY_DN6161_c0_g1;TRINITY_DN6388_c0_g3;TRINITY_DN7620_c0_g4;TRINITY_DN7915_c0_g2;TRINITY_DN8352_c0_g1;TRINITY…
Vitamin digestion and absorption	Digestive system	Organismal Systems	18	K05665;K13885;K14619;K14609;K14618;K14386;K08757;K08760;K14617;K14610;K14592;K14620;K14616;K14621;K14462;K14073;K00678;K14615	43	TRINITY_DN674_c2_g1;TRINITY_DN1093_c2_g1;TRINITY_DN1991_c0_g1;TRINITY_DN1991_c0_g2;TRINITY_DN2057_c2_g1;TRINITY_DN2008_c0_g2;TRINITY_DN2049_c0_g1;TRINITY_DN2659_c1_g1;TRINITY_DN2659_c0_g1;TRINITY_DN2754_c1_g2;TRINITY_DN3999_c0_g1;TRINITY_DN4079_c2_g1;TRINITY_DN4312_c0_g1;TRINITY_DN6322_c0_g2;TRINITY_DN6617_c2_g1;TRINITY_DN6639_c0_g1;TRINITY_DN7056_c0_g2;TRINITY_DN8447_c0_g1;TRINITY_DN9446_c0_g1;T…
Histidine metabolism	Amino acid metabolism	Metabolism	22	K00128;K08660;K14755;K00274;K01745;K00129;K11182;K14085;K00149;K00546;K13990;K00013;K00765;K01437;K01089;K02500;K01814;K00817;K01590;K01468;K01712;K05604	43	TRINITY_DN47_c0_g1;TRINITY_DN1080_c2_g2;TRINITY_DN1163_c0_g1;TRINITY_DN1609_c0_g1;TRINITY_DN1782_c0_g1;TRINITY_DN2731_c3_g1;TRINITY_DN3308_c0_g1;TRINITY_DN3873_c0_g1;TRINITY_DN4044_c0_g1;TRINITY_DN4157_c0_g1;TRINITY_DN4572_c0_g1;TRINITY_DN4760_c0_g2;TRINITY_DN4760_c0_g3;TRINITY_DN7576_c0_g1;TRINITY_DN8548_c0_g1;TRINITY_DN9898_c0_g1;TRINITY_DN11146_c0_g1;TRINITY_DN14537_c0_g1;TRINITY_DN16481_c1_g1…
Mucin type O-glycan biosynthesis	Glycan biosynthesis and metabolism	Metabolism	11	K00710;K09663;K09653;K00739;K00731;K00727;K00780;K03368;K09905;K03479;K09662	42	TRINITY_DN130_c3_g1;TRINITY_DN483_c1_g1;TRINITY_DN717_c0_g1;TRINITY_DN1493_c0_g1;TRINITY_DN1493_c0_g3;TRINITY_DN1931_c0_g2;TRINITY_DN2196_c0_g1;TRINITY_DN2599_c0_g1;TRINITY_DN2672_c0_g4;TRINITY_DN2672_c0_g1;TRINITY_DN2672_c0_g3;TRINITY_DN3399_c4_g1;TRINITY_DN3399_c4_g2;TRINITY_DN3412_c0_g1;TRINITY_DN3412_c0_g2;TRINITY_DN5839_c0_g1;TRINITY_DN6454_c0_g1;TRINITY_DN7909_c1_g2;TRINITY_DN9742_c0_g2;TRI…
Nicotine addiction	Substance dependence	Human Diseases	20	K05199;K05214;K05212;K05211;K04344;K05198;K04849;K05197;K04813;K05184;K05200;K05213;K05186;K05181;K05175;K05189;K04809;K05190;K05208;K12302	40	TRINITY_DN501_c3_g1;TRINITY_DN1805_c1_g1;TRINITY_DN2123_c1_g3;TRINITY_DN2123_c2_g1;TRINITY_DN2123_c1_g5;TRINITY_DN2123_c1_g4;TRINITY_DN2273_c1_g1;TRINITY_DN2480_c5_g1;TRINITY_DN2675_c0_g1;TRINITY_DN4887_c3_g3;TRINITY_DN4887_c3_g2;TRINITY_DN6555_c0_g1;TRINITY_DN8494_c0_g1;TRINITY_DN8756_c0_g5;TRINITY_DN8756_c0_g1;TRINITY_DN8756_c0_g2;TRINITY_DN13879_c1_g1;TRINITY_DN15585_c0_g1;TRINITY_DN15585_c0_g…
Glycosaminoglycan degradation	Glycan biosynthesis and metabolism	Metabolism	13	K01137;K01205;K12373;K12309;K07964;K01132;K01197;K10532;K01135;K01195;K01136;K01207;K07965	40	TRINITY_DN33_c2_g1;TRINITY_DN308_c0_g1;TRINITY_DN739_c0_g1;TRINITY_DN740_c1_g1;TRINITY_DN951_c0_g2;TRINITY_DN1861_c1_g1;TRINITY_DN1811_c0_g1;TRINITY_DN1811_c0_g2;TRINITY_DN4600_c0_g1;TRINITY_DN4693_c0_g1;TRINITY_DN4677_c2_g1;TRINITY_DN5119_c0_g1;TRINITY_DN6682_c0_g1;TRINITY_DN8423_c0_g1;TRINITY_DN8500_c1_g1;TRINITY_DN9402_c0_g1;TRINITY_DN10128_c1_g1;TRINITY_DN10489_c1_g3;TRINITY_DN13311_c0_g1;TRI…
SNARE interactions in vesicular transport	Folding, sorting and degradation	Genetic Information Processing	26	K08510;K08514;K13505;K13502;K08508;K08492;K08488;K08504;K08490;K08516;K04560;K08486;K08497;K08507;K08489;K08491;K08496;K08513;K08515;K08495;K08493;K08487;K08512;K08517;K08498;K08501	39	TRINITY_DN214_c0_g2;TRINITY_DN585_c1_g2;TRINITY_DN546_c3_g1;TRINITY_DN716_c0_g1;TRINITY_DN1475_c2_g1;TRINITY_DN1405_c0_g1;TRINITY_DN1707_c0_g1;TRINITY_DN1700_c0_g1;TRINITY_DN2221_c1_g1;TRINITY_DN2406_c0_g1;TRINITY_DN2846_c0_g1;TRINITY_DN2846_c2_g1;TRINITY_DN3347_c1_g1;TRINITY_DN3462_c1_g2;TRINITY_DN3462_c1_g1;TRINITY_DN3660_c0_g1;TRINITY_DN3709_c0_g1;TRINITY_DN3849_c1_g1;TRINITY_DN6018_c0_g4;TRIN…
Fatty acid biosynthesis	Lipid metabolism	Metabolism	12	K01946;K00645;K01897;K00665;K11262;K15013;K01716;K00648;K01963;K00647;K09458;K01962	37	TRINITY_DN436_c0_g2;TRINITY_DN664_c0_g3;TRINITY_DN1138_c1_g1;TRINITY_DN1375_c1_g1;TRINITY_DN1476_c7_g1;TRINITY_DN2389_c0_g1;TRINITY_DN2776_c0_g1;TRINITY_DN5811_c0_g2;TRINITY_DN7263_c0_g1;TRINITY_DN8542_c5_g1;TRINITY_DN9378_c1_g3;TRINITY_DN9378_c1_g5;TRINITY_DN11341_c5_g1;TRINITY_DN16377_c0_g1;TRINITY_DN16377_c0_g2;TRINITY_DN17555_c0_g1;TRINITY_DN19209_c0_g10;TRINITY_DN22895_c0_g17;TRINITY_DN26661…
Primary immunodeficiency	Immune diseases	Human Diseases	25	K10887;K07210;K06478;K05070;K08061;K07360;K08063;K03648;K01488;K06451;K07370;K08062;K16056;K06465;K07371;K06458;K03160;K06450;K10603;K05151;K06713;K05150;K06454;K05072;K03161	36	TRINITY_DN695_c0_g1;TRINITY_DN1827_c4_g1;TRINITY_DN1925_c0_g1;TRINITY_DN2350_c3_g1;TRINITY_DN2425_c0_g1;TRINITY_DN2556_c0_g1;TRINITY_DN3273_c0_g1;TRINITY_DN3295_c0_g1;TRINITY_DN3510_c0_g1;TRINITY_DN4948_c0_g2;TRINITY_DN5544_c0_g1;TRINITY_DN5653_c0_g1;TRINITY_DN5804_c0_g1;TRINITY_DN8545_c0_g1;TRINITY_DN8984_c0_g1;TRINITY_DN10273_c0_g1;TRINITY_DN10273_c0_g2;TRINITY_DN17489_c0_g1;TRINITY_DN21040_c0_…
Function unknown	Poorly characterized	Not Included in Pathway or Brite	23	K06890;K06883;K09142;K07071;K06944;K07002;K06889;K08997;K09791;K06975;K09895;K07119;K09979;K09917;K09861;K09161;K09975;K09915;K06903;K09910;K09160;K06911;K09786	35	TRINITY_DN627_c0_g1;TRINITY_DN931_c1_g1;TRINITY_DN1182_c0_g1;TRINITY_DN1302_c2_g1;TRINITY_DN1536_c0_g1;TRINITY_DN1550_c1_g1;TRINITY_DN1934_c0_g1;TRINITY_DN3591_c0_g1;TRINITY_DN4262_c3_g1;TRINITY_DN4397_c1_g1;TRINITY_DN6903_c0_g10;TRINITY_DN14005_c0_g3;TRINITY_DN14831_c0_g1;TRINITY_DN15280_c0_g1;TRINITY_DN16666_c0_g17;TRINITY_DN17740_c0_g1;TRINITY_DN20710_c1_g2;TRINITY_DN22633_c0_g3;TRINITY_DN2289…
Quorum sensing	Cellular community - prokaryotes	Cellular Processes	11	K03106;K01897;K01580;K03217;K10555;K08321;K10557;K01497;K03070;K07173;K02403	33	TRINITY_DN88_c0_g1;TRINITY_DN1138_c1_g1;TRINITY_DN1375_c1_g1;TRINITY_DN2439_c0_g2;TRINITY_DN2776_c0_g1;TRINITY_DN3165_c1_g2;TRINITY_DN3165_c1_g1;TRINITY_DN8542_c5_g1;TRINITY_DN16377_c0_g1;TRINITY_DN16377_c0_g2;TRINITY_DN17555_c0_g1;TRINITY_DN19378_c0_g7;TRINITY_DN19378_c0_g2;TRINITY_DN19378_c0_g3;TRINITY_DN22895_c0_g17;TRINITY_DN25957_c0_g3;TRINITY_DN26268_c0_g4;TRINITY_DN26268_c0_g8;TRINITY_DN26…
Glycosphingolipid biosynthesis - lacto and neolacto series	Glycan biosynthesis and metabolism	Metabolism	21	K07966;K00719;K00741;K00742;K00709;K00781;K00716;K01988;K07820;K03877;K07970;K07971;K03494;K07635;K03371;K07969;K07968;K00718;K03766;K00743;K03792	33	TRINITY_DN580_c0_g1;TRINITY_DN707_c1_g1;TRINITY_DN1155_c1_g2;TRINITY_DN1272_c1_g1;TRINITY_DN1272_c1_g2;TRINITY_DN1205_c0_g1;TRINITY_DN1784_c0_g1;TRINITY_DN2216_c1_g2;TRINITY_DN2450_c0_g2;TRINITY_DN2895_c3_g1;TRINITY_DN3623_c2_g1;TRINITY_DN3623_c0_g1;TRINITY_DN4559_c1_g1;TRINITY_DN4835_c1_g1;TRINITY_DN5514_c0_g1;TRINITY_DN8266_c0_g1;TRINITY_DN15310_c0_g1;TRINITY_DN17808_c0_g2;TRINITY_DN21814_c0_g1…
Prenyltransferases	Protein families: metabolism	Brite Hierarchies	17	K00804;K02257;K06125;K11713;K14050;K00787;K12504;K14137;K05956;K11778;K12505;K05955;K00791;K00801;K03179;K05954;K02301	32	TRINITY_DN53_c1_g1;TRINITY_DN184_c1_g2;TRINITY_DN134_c2_g1;TRINITY_DN110_c2_g2;TRINITY_DN568_c0_g1;TRINITY_DN845_c3_g1;TRINITY_DN943_c0_g1;TRINITY_DN2036_c1_g1;TRINITY_DN2879_c0_g1;TRINITY_DN3448_c0_g4;TRINITY_DN3788_c0_g2;TRINITY_DN4486_c0_g1;TRINITY_DN4740_c0_g1;TRINITY_DN5523_c0_g1;TRINITY_DN7291_c1_g1;TRINITY_DN7489_c0_g1;TRINITY_DN12516_c1_g1;TRINITY_DN13322_c0_g1;TRINITY_DN13322_c0_g2;TRINI…
Thiamine metabolism	Metabolism of cofactors and vitamins	Metabolism	12	K04487;K01077;K05307;K00949;K00939;K06928;K03149;K06949;K03151;K01662;K00878;K00946	31	TRINITY_DN261_c1_g1;TRINITY_DN794_c0_g1;TRINITY_DN1468_c1_g1;TRINITY_DN1544_c1_g2;TRINITY_DN1589_c0_g1;TRINITY_DN2876_c3_g2;TRINITY_DN3296_c0_g1;TRINITY_DN3271_c3_g1;TRINITY_DN4405_c1_g3;TRINITY_DN4405_c1_g1;TRINITY_DN10369_c0_g1;TRINITY_DN11533_c0_g1;TRINITY_DN12579_c0_g4;TRINITY_DN12579_c0_g5;TRINITY_DN12579_c0_g2;TRINITY_DN14177_c4_g1;TRINITY_DN20301_c0_g6;TRINITY_DN22643_c0_g3;TRINITY_DN23755…
Phototransduction	Sensory system	Organismal Systems	12	K04536;K13749;K08718;K12321;K04250;K04631;K13765;K02183;K04952;K00909;K04948;K12322	31	TRINITY_DN1714_c1_g3;TRINITY_DN1714_c1_g1;TRINITY_DN3656_c1_g1;TRINITY_DN4116_c0_g1;TRINITY_DN7131_c0_g1;TRINITY_DN7505_c0_g1;TRINITY_DN11508_c1_g1;TRINITY_DN12672_c0_g1;TRINITY_DN14923_c0_g4;TRINITY_DN14923_c0_g1;TRINITY_DN15821_c1_g1;TRINITY_DN15959_c0_g1;TRINITY_DN16940_c0_g1;TRINITY_DN19632_c0_g1;TRINITY_DN24823_c0_g1;TRINITY_DN24823_c0_g2;TRINITY_DN33128_c3_g1;TRINITY_DN36017_c0_g1;TRINITY_D…
Ubiquinone and other terpenoid-quinone biosynthesis	Metabolism of cofactors and vitamins	Metabolism	16	K10106;K06125;K06126;K00355;K00591;K00457;K05357;K00568;K03179;K03809;K00815;K03182;K06127;K02549;K02551;K08680	30	TRINITY_DN68_c0_g1;TRINITY_DN134_c2_g1;TRINITY_DN1712_c0_g2;TRINITY_DN2817_c0_g1;TRINITY_DN2940_c1_g1;TRINITY_DN3448_c0_g4;TRINITY_DN3781_c0_g2;TRINITY_DN3781_c0_g3;TRINITY_DN5060_c0_g1;TRINITY_DN5598_c2_g1;TRINITY_DN7533_c1_g1;TRINITY_DN11384_c0_g1;TRINITY_DN19204_c0_g4;TRINITY_DN25281_c0_g1;TRINITY_DN26083_c0_g1;TRINITY_DN26760_c0_g5;TRINITY_DN28199_c0_g1;TRINITY_DN33114_c0_g1;TRINITY_DN33114_c…
Nitrogen metabolism	Energy metabolism	Metabolism	10	K01672;K18246;K00261;K01948;K05601;K01725;K03385;K02567;K00284;K18245	29	TRINITY_DN352_c2_g1;TRINITY_DN3349_c0_g1;TRINITY_DN4772_c1_g1;TRINITY_DN6689_c0_g1;TRINITY_DN6689_c0_g2;TRINITY_DN7161_c0_g1;TRINITY_DN9473_c0_g1;TRINITY_DN10452_c0_g1;TRINITY_DN25095_c5_g1;TRINITY_DN28844_c0_g1;TRINITY_DN32893_c0_g1;TRINITY_DN32893_c0_g2;TRINITY_DN33166_c0_g6;TRINITY_DN33166_c0_g15;TRINITY_DN33747_c0_g4;TRINITY_DN38295_c0_g3;TRINITY_DN38589_c0_g1;TRINITY_DN38589_c0_g3;TRINITY_DN…
Glycosphingolipid biosynthesis - ganglio series	Glycan biosynthesis and metabolism	Metabolism	12	K12373;K12309;K03373;K03370;K03372;K03376;K03374;K00780;K03368;K03371;K03369;K03375	29	TRINITY_DN739_c0_g1;TRINITY_DN740_c1_g1;TRINITY_DN951_c0_g2;TRINITY_DN1640_c2_g1;TRINITY_DN2017_c1_g3;TRINITY_DN3246_c0_g1;TRINITY_DN4600_c0_g1;TRINITY_DN4677_c2_g1;TRINITY_DN5127_c1_g3;TRINITY_DN5710_c0_g1;TRINITY_DN5764_c0_g1;TRINITY_DN8500_c1_g1;TRINITY_DN9286_c1_g1;TRINITY_DN9402_c0_g1;TRINITY_DN10128_c1_g1;TRINITY_DN12389_c0_g1;TRINITY_DN13593_c0_g2;TRINITY_DN13852_c0_g2;TRINITY_DN17808_c0_g…
Biofilm formation - Escherichia coli	Cellular community - prokaryotes	Cellular Processes	10	K00688;K04336;K07173;K18968;K05851;K00975;K00703;K03563;K02403;K03087	29	TRINITY_DN69_c2_g2;TRINITY_DN69_c2_g1;TRINITY_DN601_c4_g1;TRINITY_DN641_c3_g1;TRINITY_DN2075_c7_g1;TRINITY_DN5411_c1_g1;TRINITY_DN7383_c1_g1;TRINITY_DN12245_c2_g2;TRINITY_DN15457_c0_g1;TRINITY_DN19438_c0_g9;TRINITY_DN26268_c0_g9;TRINITY_DN26268_c0_g12;TRINITY_DN31534_c0_g4;TRINITY_DN31534_c0_g6;TRINITY_DN31534_c0_g2;TRINITY_DN43755_c0_g17;TRINITY_DN53352_c0_g2;TRINITY_DN53352_c0_g16;TRINITY_DN538…
Glycosaminoglycan biosynthesis - heparan sulfate / heparin	Glycan biosynthesis and metabolism	Metabolism	19	K02577;K02576;K02366;K02369;K07809;K00771;K10158;K02514;K01024;K00734;K02367;K08104;K08103;K02370;K02368;K08102;K02578;K01793;K07808	28	TRINITY_DN383_c0_g1;TRINITY_DN966_c0_g1;TRINITY_DN1316_c0_g3;TRINITY_DN1646_c0_g1;TRINITY_DN1788_c1_g2;TRINITY_DN2069_c0_g1;TRINITY_DN3543_c0_g1;TRINITY_DN3922_c1_g3;TRINITY_DN3922_c1_g1;TRINITY_DN4086_c1_g1;TRINITY_DN5122_c0_g1;TRINITY_DN5864_c3_g1;TRINITY_DN9739_c1_g2;TRINITY_DN9914_c1_g1;TRINITY_DN11180_c0_g1;TRINITY_DN18871_c0_g1;TRINITY_DN22385_c0_g2;TRINITY_DN28764_c0_g1;TRINITY_DN29782_c0_…
Renin-angiotensin system	Endocrine system	Organismal Systems	18	K11140;K01393;K01257;K01285;K19514;K01322;K01392;K11141;K04167;K01329;K01389;K08780;K09708;K01319;K04303;K04166;K08392;K01283	27	TRINITY_DN2036_c0_g1;TRINITY_DN2121_c8_g1;TRINITY_DN2459_c1_g1;TRINITY_DN3330_c0_g1;TRINITY_DN3330_c0_g3;TRINITY_DN4185_c0_g5;TRINITY_DN4185_c0_g1;TRINITY_DN4185_c0_g3;TRINITY_DN4848_c0_g1;TRINITY_DN5358_c0_g1;TRINITY_DN7267_c0_g2;TRINITY_DN8478_c7_g1;TRINITY_DN10425_c0_g1;TRINITY_DN10714_c0_g1;TRINITY_DN15212_c0_g1;TRINITY_DN19490_c0_g2;TRINITY_DN22415_c0_g1;TRINITY_DN29232_c0_g1;TRINITY_DN32755…
African trypanosomiasis	Infectious diseases: Parasitic	Human Diseases	19	K04634;K05482;K08757;K04390;K05858;K05405;K06527;K06241;K01392;K02677;K10161;K06494;K19663;K06490;K05443;K04234;K05406;K00463;K19662	27	TRINITY_DN22_c0_g3;TRINITY_DN485_c1_g1;TRINITY_DN770_c0_g1;TRINITY_DN2659_c1_g1;TRINITY_DN2659_c0_g1;TRINITY_DN3019_c1_g1;TRINITY_DN3259_c0_g1;TRINITY_DN3651_c0_g1;TRINITY_DN4071_c0_g1;TRINITY_DN4259_c0_g1;TRINITY_DN4259_c0_g2;TRINITY_DN4792_c0_g1;TRINITY_DN5358_c0_g1;TRINITY_DN6637_c0_g1;TRINITY_DN7325_c0_g3;TRINITY_DN8374_c2_g1;TRINITY_DN10364_c0_g1;TRINITY_DN10364_c0_g2;TRINITY_DN10590_c0_g1;T…
Plant-pathogen interaction	Environmental adaptation	Organismal Systems	6	K04368;K04079;K09487;K00864;K02183;K12795	27	TRINITY_DN1216_c0_g1;TRINITY_DN2065_c1_g1;TRINITY_DN2274_c0_g1;TRINITY_DN2902_c1_g1;TRINITY_DN2902_c0_g1;TRINITY_DN5837_c0_g1;TRINITY_DN7438_c0_g1;TRINITY_DN7970_c0_g2;TRINITY_DN15959_c0_g1;TRINITY_DN17386_c1_g1;TRINITY_DN18001_c0_g1;TRINITY_DN20710_c0_g1;TRINITY_DN20710_c0_g10;TRINITY_DN20988_c0_g4;TRINITY_DN25986_c0_g1;TRINITY_DN30787_c0_g1;TRINITY_DN35517_c0_g5;TRINITY_DN35517_c0_g1;TRINITY_DN…
Non-homologous end-joining	Replication and repair	Genetic Information Processing	13	K03512;K10886;K10887;K10884;K10777;K10885;K04799;K03513;K06642;K10865;K10866;K00977;K10980	27	TRINITY_DN498_c0_g2;TRINITY_DN491_c2_g1;TRINITY_DN695_c0_g1;TRINITY_DN1827_c4_g1;TRINITY_DN2898_c2_g1;TRINITY_DN4483_c0_g1;TRINITY_DN6545_c0_g1;TRINITY_DN7137_c0_g1;TRINITY_DN8136_c0_g1;TRINITY_DN8792_c0_g1;TRINITY_DN8792_c0_g2;TRINITY_DN9371_c0_g1;TRINITY_DN10770_c2_g1;TRINITY_DN16247_c0_g1;TRINITY_DN20554_c2_g1;TRINITY_DN34953_c2_g1;TRINITY_DN41923_c0_g1;TRINITY_DN42376_c0_g7;TRINITY_DN42781_c0…
General function prediction only	Poorly characterized	Not Included in Pathway or Brite	18	K07048;K13707;K06874;K07023;K13697;K13256;K07058;K07146;K04065;K03808;K04477;K13696;K11477;K07160;K03747;K08990;K02441;K08279	27	TRINITY_DN885_c2_g1;TRINITY_DN4061_c1_g2;TRINITY_DN4837_c1_g2;TRINITY_DN6764_c0_g1;TRINITY_DN7775_c0_g7;TRINITY_DN7908_c1_g1;TRINITY_DN10781_c1_g2;TRINITY_DN10781_c1_g1;TRINITY_DN13408_c0_g8;TRINITY_DN13750_c0_g6;TRINITY_DN16523_c2_g3;TRINITY_DN17003_c0_g1;TRINITY_DN17647_c0_g3;TRINITY_DN19209_c0_g5;TRINITY_DN19209_c0_g9;TRINITY_DN19209_c0_g11;TRINITY_DN19438_c0_g16;TRINITY_DN19660_c0_g1;TRINITY_…
Maturity onset diabetes of the young	Endocrine and metabolic diseases	Human Diseases	18	K07595;K08040;K08035;K08034;K08036;K08027;K12406;K07292;K08031;K08037;K08030;K08024;K08026;K19521;K08032;K06054;K08038;K08033	25	TRINITY_DN2151_c2_g1;TRINITY_DN2273_c5_g1;TRINITY_DN2888_c1_g2;TRINITY_DN3298_c1_g1;TRINITY_DN4251_c0_g1;TRINITY_DN4251_c0_g2;TRINITY_DN4465_c0_g1;TRINITY_DN9192_c0_g1;TRINITY_DN11487_c3_g1;TRINITY_DN12263_c0_g1;TRINITY_DN12770_c2_g1;TRINITY_DN15664_c0_g1;TRINITY_DN19575_c0_g1;TRINITY_DN21083_c7_g1;TRINITY_DN22446_c0_g2;TRINITY_DN24333_c0_g1;TRINITY_DN27560_c0_g1;TRINITY_DN29491_c1_g1;TRINITY_DN2…
Photosynthesis proteins	Protein families: metabolism	Brite Hierarchies	16	K08910;K02699;K02695;K08907;K08914;K14332;K02716;K08913;K08915;K02639;K02111;K02116;K02115;K02112;K02721;K08917	24	TRINITY_DN7755_c0_g1;TRINITY_DN7755_c0_g2;TRINITY_DN8615_c0_g1;TRINITY_DN8615_c0_g2;TRINITY_DN10193_c0_g1;TRINITY_DN10193_c0_g2;TRINITY_DN10193_c0_g3;TRINITY_DN14109_c0_g1;TRINITY_DN14109_c0_g2;TRINITY_DN17060_c0_g1;TRINITY_DN23494_c0_g1;TRINITY_DN23494_c0_g2;TRINITY_DN34470_c0_g3;TRINITY_DN38258_c0_g1;TRINITY_DN38258_c0_g2;TRINITY_DN38866_c0_g1;TRINITY_DN38866_c0_g2;TRINITY_DN40422_c0_g1;TRINITY…
Vitamin B6 metabolism	Metabolism of cofactors and vitamins	Metabolism	8	K07758;K00275;K00157;K13248;K00868;K03473;K00831;K00097	24	TRINITY_DN120_c2_g1;TRINITY_DN130_c2_g1;TRINITY_DN668_c1_g1;TRINITY_DN4348_c1_g1;TRINITY_DN4768_c8_g1;TRINITY_DN5331_c0_g1;TRINITY_DN8680_c3_g1;TRINITY_DN11431_c0_g1;TRINITY_DN12892_c4_g1;TRINITY_DN13187_c0_g1;TRINITY_DN15006_c0_g1;TRINITY_DN19730_c1_g1;TRINITY_DN22686_c0_g1;TRINITY_DN30331_c0_g15;TRINITY_DN36380_c0_g1;TRINITY_DN36380_c0_g2;TRINITY_DN39828_c0_g1;TRINITY_DN64630_c1_g4;TRINITY_DN81…
Sulfur metabolism	Energy metabolism	Metabolism	13	K17725;K15759;K01082;K00387;K01011;K17218;K00651;K00380;K00390;K04091;K00956;K02047;K00381	23	TRINITY_DN126_c0_g1;TRINITY_DN1062_c1_g1;TRINITY_DN1857_c12_g1;TRINITY_DN1995_c4_g1;TRINITY_DN6303_c0_g1;TRINITY_DN6825_c0_g1;TRINITY_DN8396_c0_g1;TRINITY_DN15853_c0_g2;TRINITY_DN19438_c0_g2;TRINITY_DN21531_c0_g3;TRINITY_DN22487_c1_g1;TRINITY_DN23017_c0_g2;TRINITY_DN26765_c0_g5;TRINITY_DN26765_c0_g2;TRINITY_DN31479_c0_g7;TRINITY_DN39803_c0_g1;TRINITY_DN52563_c0_g3;TRINITY_DN70368_c0_g5;TRINITY_DN…
Lipopolysaccharide biosynthesis proteins	Protein families: metabolism	Brite Hierarchies	16	K01627;K00912;K00979;K03270;K02851;K10011;K07806;K10012;K02535;K00748;K03272;K03274;K03279;K03271;K03269;K07264	23	TRINITY_DN11947_c0_g1;TRINITY_DN14005_c0_g4;TRINITY_DN14005_c0_g1;TRINITY_DN14005_c0_g9;TRINITY_DN21963_c0_g5;TRINITY_DN22533_c0_g8;TRINITY_DN25358_c0_g4;TRINITY_DN25358_c0_g5;TRINITY_DN25358_c0_g6;TRINITY_DN25358_c0_g1;TRINITY_DN25358_c0_g3;TRINITY_DN26268_c0_g5;TRINITY_DN32476_c0_g1;TRINITY_DN33261_c0_g6;TRINITY_DN33261_c0_g7;TRINITY_DN33261_c0_g3;TRINITY_DN38591_c0_g7;TRINITY_DN38591_c0_g2;TRI…
Valine, leucine and isoleucine biosynthesis	Amino acid metabolism	Metabolism	8	K17989;K00826;K01649;K01703;K14260;K00053;K01687;K01704	23	TRINITY_DN1597_c3_g1;TRINITY_DN4890_c1_g2;TRINITY_DN8166_c0_g1;TRINITY_DN9843_c0_g4;TRINITY_DN9843_c0_g1;TRINITY_DN25328_c0_g1;TRINITY_DN25856_c0_g4;TRINITY_DN25856_c0_g1;TRINITY_DN25856_c0_g3;TRINITY_DN26818_c0_g10;TRINITY_DN37631_c0_g6;TRINITY_DN37672_c1_g3;TRINITY_DN53583_c0_g7;TRINITY_DN53583_c0_g1;TRINITY_DN53583_c0_g3;TRINITY_DN53583_c0_g9;TRINITY_DN53583_c0_g16;TRINITY_DN53583_c0_g14;TRINI…
Phenylalanine, tyrosine and tryptophan biosynthesis	Amino acid metabolism	Metabolism	14	K14455;K14454;K00500;K01736;K00817;K01735;K01696;K01695;K00014;K00815;K05887;K00800;K04517;K00891	23	TRINITY_DN709_c0_g1;TRINITY_DN931_c3_g1;TRINITY_DN7284_c0_g2;TRINITY_DN8272_c0_g3;TRINITY_DN22421_c0_g4;TRINITY_DN22421_c0_g9;TRINITY_DN24499_c0_g3;TRINITY_DN25030_c0_g3;TRINITY_DN30176_c1_g7;TRINITY_DN30176_c1_g6;TRINITY_DN30176_c1_g5;TRINITY_DN31979_c0_g2;TRINITY_DN32249_c0_g2;TRINITY_DN33114_c0_g1;TRINITY_DN33114_c0_g2;TRINITY_DN36329_c0_g1;TRINITY_DN49882_c0_g5;TRINITY_DN57052_c0_g1;TRINITY_D…
Streptomycin biosynthesis	Biosynthesis of other secondary metabolites	Metabolism	5	K01092;K01835;K01710;K01858;K00844	23	TRINITY_DN582_c0_g4;TRINITY_DN1822_c0_g1;TRINITY_DN2047_c0_g1;TRINITY_DN2068_c0_g1;TRINITY_DN2163_c0_g1;TRINITY_DN2265_c3_g1;TRINITY_DN2837_c0_g4;TRINITY_DN2837_c0_g1;TRINITY_DN2837_c0_g2;TRINITY_DN8578_c4_g1;TRINITY_DN10146_c0_g1;TRINITY_DN10146_c0_g2;TRINITY_DN14149_c0_g1;TRINITY_DN14149_c0_g3;TRINITY_DN14482_c1_g1;TRINITY_DN27303_c0_g2;TRINITY_DN31536_c3_g1;TRINITY_DN31979_c0_g4;TRINITY_DN3913…
Translation	Unclassified: genetic information processing	Not Included in Pathway or Brite	6	K16634;K17943;K17392;K18460;K07575;K15025	22	TRINITY_DN1205_c1_g1;TRINITY_DN1332_c0_g1;TRINITY_DN1332_c0_g2;TRINITY_DN1575_c0_g1;TRINITY_DN1773_c0_g5;TRINITY_DN1773_c0_g1;TRINITY_DN1773_c0_g3;TRINITY_DN1992_c0_g1;TRINITY_DN4446_c3_g1;TRINITY_DN7053_c0_g1;TRINITY_DN12760_c2_g1;TRINITY_DN18277_c4_g1;TRINITY_DN19908_c0_g1;TRINITY_DN20141_c0_g1;TRINITY_DN25626_c2_g1;TRINITY_DN36743_c0_g1;TRINITY_DN46375_c3_g1;TRINITY_DN72679_c0_g1;TRINITY_DN935…
Caprolactam degradation	Xenobiotics biodegradation and metabolism	Metabolism	8	K07515;K00002;K00022;K07514;K07511;K01053;K01782;K01825	22	TRINITY_DN985_c2_g1;TRINITY_DN1374_c0_g2;TRINITY_DN1691_c3_g1;TRINITY_DN1691_c3_g2;TRINITY_DN2583_c0_g2;TRINITY_DN3778_c4_g1;TRINITY_DN4145_c4_g1;TRINITY_DN4749_c1_g1;TRINITY_DN7873_c0_g1;TRINITY_DN8935_c5_g1;TRINITY_DN13798_c4_g1;TRINITY_DN22913_c0_g2;TRINITY_DN23924_c0_g2;TRINITY_DN34462_c0_g4;TRINITY_DN40474_c3_g1;TRINITY_DN44015_c0_g1;TRINITY_DN44015_c0_g2;TRINITY_DN54109_c0_g1;TRINITY_DN7106…
Glycosphingolipid biosynthesis - globo and isoglobo series	Glycan biosynthesis and metabolism	Metabolism	10	K00722;K12373;K00719;K01204;K01988;K03877;K00780;K03368;K03371;K00718	22	TRINITY_DN133_c0_g1;TRINITY_DN739_c0_g1;TRINITY_DN707_c1_g1;TRINITY_DN951_c0_g2;TRINITY_DN1575_c3_g1;TRINITY_DN2450_c0_g2;TRINITY_DN3623_c2_g1;TRINITY_DN3623_c0_g1;TRINITY_DN4677_c2_g1;TRINITY_DN9402_c0_g1;TRINITY_DN10128_c1_g1;TRINITY_DN13593_c0_g2;TRINITY_DN13852_c0_g2;TRINITY_DN17808_c0_g2;TRINITY_DN18928_c0_g2;TRINITY_DN24712_c0_g1;TRINITY_DN28158_c0_g1;TRINITY_DN32032_c1_g1;TRINITY_DN74287_c…
Mannose type O-glycan biosynthesis	Glycan biosynthesis and metabolism	Metabolism	12	K09654;K07966;K09668;K00728;K09666;K00781;K18207;K09674;K17547;K00735;K07968;K10157	21	TRINITY_DN137_c0_g1;TRINITY_DN580_c0_g1;TRINITY_DN1087_c2_g1;TRINITY_DN1101_c0_g1;TRINITY_DN1643_c0_g1;TRINITY_DN1784_c0_g1;TRINITY_DN1852_c0_g1;TRINITY_DN1864_c0_g1;TRINITY_DN1981_c0_g1;TRINITY_DN3556_c0_g1;TRINITY_DN7620_c0_g4;TRINITY_DN11873_c0_g1;TRINITY_DN15794_c2_g1;TRINITY_DN19859_c0_g1;TRINITY_DN20053_c0_g1;TRINITY_DN23554_c0_g1;TRINITY_DN29368_c1_g1;TRINITY_DN37091_c0_g1;TRINITY_DN56323_…
Glycosaminoglycan biosynthesis - chondroitin sulfate / dermatan sulfate	Glycan biosynthesis and metabolism	Metabolism	15	K01020;K00747;K00771;K08105;K10158;K00746;K04742;K01017;K03193;K00734;K01794;K08106;K04743;K13499;K07779	21	TRINITY_DN128_c0_g2;TRINITY_DN420_c1_g1;TRINITY_DN2069_c0_g1;TRINITY_DN2083_c3_g1;TRINITY_DN3543_c0_g1;TRINITY_DN3922_c1_g3;TRINITY_DN3922_c1_g1;TRINITY_DN5083_c0_g1;TRINITY_DN6048_c1_g2;TRINITY_DN6048_c1_g1;TRINITY_DN9784_c1_g1;TRINITY_DN9914_c1_g1;TRINITY_DN10781_c0_g1;TRINITY_DN12599_c1_g1;TRINITY_DN13103_c0_g1;TRINITY_DN20164_c0_g1;TRINITY_DN23081_c0_g1;TRINITY_DN44589_c0_g1;TRINITY_DN62242_c…
Cell motility	Unclassified: signaling and cellular processes	Not Included in Pathway or Brite	12	K05721;K19716;K05724;K15421;K05723;K17085;K18598;K19408;K13905;K13906;K15723;K13902	21	TRINITY_DN1171_c1_g2;TRINITY_DN1201_c0_g1;TRINITY_DN2095_c1_g2;TRINITY_DN2805_c1_g1;TRINITY_DN3599_c0_g1;TRINITY_DN4384_c0_g1;TRINITY_DN6910_c1_g2;TRINITY_DN6910_c1_g1;TRINITY_DN6988_c0_g1;TRINITY_DN6966_c0_g1;TRINITY_DN7484_c1_g1;TRINITY_DN9641_c0_g1;TRINITY_DN11210_c0_g2;TRINITY_DN19985_c0_g1;TRINITY_DN24077_c0_g1;TRINITY_DN32706_c3_g1;TRINITY_DN33762_c0_g4;TRINITY_DN35202_c0_g1;TRINITY_DN36837…
Cell cycle - Caulobacter	Cell growth and death	Cellular Processes	5	K03544;K01338;K01358;K02488;K02313	21	TRINITY_DN783_c0_g1;TRINITY_DN1017_c1_g2;TRINITY_DN1082_c2_g2;TRINITY_DN1963_c2_g1;TRINITY_DN4050_c1_g1;TRINITY_DN22487_c0_g1;TRINITY_DN22487_c0_g14;TRINITY_DN25479_c2_g1;TRINITY_DN27166_c0_g1;TRINITY_DN48274_c1_g1;TRINITY_DN58093_c0_g4;TRINITY_DN58093_c0_g6;TRINITY_DN58093_c0_g9;TRINITY_DN75074_c0_g3;TRINITY_DN75074_c0_g10;TRINITY_DN80357_c3_g1;TRINITY_DN86281_c0_g1;TRINITY_DN86281_c0_g2;TRINITY…
Isoquinoline alkaloid biosynthesis	Biosynthesis of other secondary metabolites	Metabolism	7	K00276;K14455;K14454;K00274;K00815;K01593;K00501	21	TRINITY_DN291_c0_g1;TRINITY_DN709_c0_g1;TRINITY_DN931_c3_g1;TRINITY_DN1609_c0_g1;TRINITY_DN2239_c0_g2;TRINITY_DN4572_c0_g2;TRINITY_DN4572_c0_g3;TRINITY_DN7284_c0_g2;TRINITY_DN11146_c0_g1;TRINITY_DN27693_c0_g3;TRINITY_DN33114_c0_g1;TRINITY_DN33114_c0_g2;TRINITY_DN36329_c0_g1;TRINITY_DN38375_c4_g1;TRINITY_DN43879_c1_g1;TRINITY_DN52649_c0_g1;TRINITY_DN52649_c0_g2;TRINITY_DN57052_c0_g1;TRINITY_DN8325…
Prokaryotic defense system	Protein families: signaling and cellular processes	Brite Hierarchies	8	K04487;K01885;K00558;K18837;K19156;K19048;K03569;K18831	20	TRINITY_DN261_c1_g1;TRINITY_DN1570_c2_g2;TRINITY_DN1570_c2_g1;TRINITY_DN1887_c0_g1;TRINITY_DN2876_c3_g2;TRINITY_DN9947_c0_g2;TRINITY_DN11160_c0_g5;TRINITY_DN16624_c1_g2;TRINITY_DN22643_c0_g3;TRINITY_DN27368_c0_g1;TRINITY_DN29773_c0_g6;TRINITY_DN35022_c0_g1;TRINITY_DN50006_c0_g2;TRINITY_DN56715_c0_g1;TRINITY_DN74742_c0_g1;TRINITY_DN88010_c0_g4;TRINITY_DN88010_c0_g1;TRINITY_DN94069_c0_g1;TRINITY_DN…
Lipid metabolism	Unclassified: metabolism	Not Included in Pathway or Brite	7	K11730;K19581;K11729;K19582;K19365;K16815;K16861	20	TRINITY_DN1589_c1_g1;TRINITY_DN1828_c1_g1;TRINITY_DN1866_c0_g1;TRINITY_DN3780_c1_g1;TRINITY_DN4510_c3_g1;TRINITY_DN4852_c0_g2;TRINITY_DN5808_c0_g1;TRINITY_DN7419_c0_g1;TRINITY_DN8349_c1_g1;TRINITY_DN9468_c1_g1;TRINITY_DN13651_c0_g1;TRINITY_DN20705_c3_g1;TRINITY_DN25418_c1_g1;TRINITY_DN38232_c1_g2;TRINITY_DN40779_c0_g3;TRINITY_DN71588_c0_g2;TRINITY_DN96192_c0_g1;TRINITY_DN111360_c0_g1;TRINITY_DN12…
Primary bile acid biosynthesis	Lipid metabolism	Metabolism	11	K10214;K07430;K08764;K00488;K12405;K11992;K07440;K10223;K08748;K00251;K01796	20	TRINITY_DN847_c0_g1;TRINITY_DN847_c0_g2;TRINITY_DN1482_c2_g1;TRINITY_DN3724_c0_g1;TRINITY_DN4637_c0_g1;TRINITY_DN7015_c0_g1;TRINITY_DN8081_c0_g1;TRINITY_DN8686_c2_g1;TRINITY_DN9621_c0_g1;TRINITY_DN15098_c2_g1;TRINITY_DN15172_c0_g1;TRINITY_DN19148_c0_g1;TRINITY_DN19148_c0_g3;TRINITY_DN40945_c0_g2;TRINITY_DN50714_c0_g1;TRINITY_DN62539_c0_g1;TRINITY_DN105653_c0_g1;TRINITY_DN122342_c0_g1;TRINITY_DN12…
Circadian rhythm - fly	Environmental adaptation	Organismal Systems	6	K09057;K02633;K02223;K08960;K02296;K03083	20	TRINITY_DN611_c1_g1;TRINITY_DN834_c0_g1;TRINITY_DN1194_c0_g2;TRINITY_DN1200_c2_g1;TRINITY_DN2612_c0_g1;TRINITY_DN2612_c0_g2;TRINITY_DN2809_c0_g6;TRINITY_DN10373_c0_g1;TRINITY_DN15047_c0_g1;TRINITY_DN15320_c1_g1;TRINITY_DN17415_c2_g1;TRINITY_DN19350_c0_g1;TRINITY_DN21641_c1_g1;TRINITY_DN33380_c0_g1;TRINITY_DN56591_c4_g1;TRINITY_DN70930_c0_g1;TRINITY_DN70930_c0_g2;TRINITY_DN78616_c0_g1;TRINITY_DN87…
Riboflavin metabolism	Metabolism of cofactors and vitamins	Metabolism	7	K01513;K14410;K00953;K00861;K01497;K14379;K00794	19	TRINITY_DN1189_c3_g1;TRINITY_DN1712_c0_g1;TRINITY_DN2671_c1_g1;TRINITY_DN3948_c0_g1;TRINITY_DN3983_c0_g1;TRINITY_DN4045_c1_g1;TRINITY_DN8269_c0_g1;TRINITY_DN8269_c0_g2;TRINITY_DN17247_c1_g1;TRINITY_DN19048_c0_g4;TRINITY_DN22169_c0_g1;TRINITY_DN23832_c0_g1;TRINITY_DN25957_c0_g3;TRINITY_DN28467_c0_g1;TRINITY_DN58472_c0_g1;TRINITY_DN62740_c0_g1;TRINITY_DN65757_c0_g3;TRINITY_DN123761_c0_g2;TRINITY_DN…
Sulfur relay system	Folding, sorting and degradation	Genetic Information Processing	10	K14169;K14168;K04487;K03635;K03639;K01011;K00566;K03151;K07235;K12161	19	TRINITY_DN77_c0_g1;TRINITY_DN11_c6_g1;TRINITY_DN261_c1_g1;TRINITY_DN1321_c1_g1;TRINITY_DN2876_c3_g2;TRINITY_DN4239_c3_g1;TRINITY_DN5581_c0_g1;TRINITY_DN6303_c0_g1;TRINITY_DN6807_c0_g1;TRINITY_DN15853_c0_g2;TRINITY_DN19984_c1_g1;TRINITY_DN20450_c0_g3;TRINITY_DN22643_c0_g3;TRINITY_DN27948_c0_g2;TRINITY_DN48263_c0_g7;TRINITY_DN52670_c0_g1;TRINITY_DN94069_c0_g1;TRINITY_DN102515_c0_g4;TRINITY_DN113258…
Asthma	Immune diseases	Human Diseases	9	K06752;K16597;K05443;K03160;K10786;K10788;K08089;K05432;K03161	17	TRINITY_DN1606_c0_g2;TRINITY_DN5146_c2_g1;TRINITY_DN8170_c1_g1;TRINITY_DN8577_c0_g1;TRINITY_DN15238_c1_g2;TRINITY_DN15238_c1_g1;TRINITY_DN15238_c0_g1;TRINITY_DN17023_c0_g1;TRINITY_DN20288_c0_g1;TRINITY_DN21040_c0_g4;TRINITY_DN22477_c0_g1;TRINITY_DN26091_c0_g1;TRINITY_DN34174_c0_g1;TRINITY_DN37235_c0_g1;TRINITY_DN61198_c0_g1;TRINITY_DN111871_c0_g1;TRINITY_DN111941_c0_g1
Peptidoglycan biosynthesis and degradation proteins	Protein families: metabolism	Brite Hierarchies	13	K00075;K01775;K08308;K03814;K01928;K01924;K01000;K08306;K07261;K01776;K00790;K08307;K19304	17	TRINITY_DN16390_c0_g5;TRINITY_DN18468_c0_g9;TRINITY_DN18468_c0_g12;TRINITY_DN21565_c0_g11;TRINITY_DN21963_c0_g10;TRINITY_DN24628_c0_g3;TRINITY_DN26268_c0_g10;TRINITY_DN29030_c0_g2;TRINITY_DN30136_c0_g5;TRINITY_DN30136_c0_g7;TRINITY_DN31979_c0_g16;TRINITY_DN31979_c0_g10;TRINITY_DN38693_c0_g11;TRINITY_DN43722_c0_g7;TRINITY_DN44294_c0_g6;TRINITY_DN44294_c0_g1;TRINITY_DN82271_c1_g7
D-Glutamine and D-glutamate metabolism	Metabolism of other amino acids	Metabolism	4	K01425;K00261;K01924;K01776	16	TRINITY_DN2161_c6_g1;TRINITY_DN3647_c0_g2;TRINITY_DN6689_c0_g1;TRINITY_DN6689_c0_g2;TRINITY_DN9191_c0_g1;TRINITY_DN9191_c0_g2;TRINITY_DN11249_c6_g1;TRINITY_DN13192_c0_g1;TRINITY_DN13192_c0_g2;TRINITY_DN13568_c1_g3;TRINITY_DN22779_c0_g1;TRINITY_DN23825_c0_g1;TRINITY_DN26268_c0_g10;TRINITY_DN38693_c0_g11;TRINITY_DN93276_c2_g1;TRINITY_DN93725_c3_g1
Glycosaminoglycan biosynthesis - keratan sulfate	Glycan biosynthesis and metabolism	Metabolism	13	K01022;K07966;K00741;K04746;K00781;K04745;K09664;K00717;K00780;K03368;K07969;K07968;K09671	16	TRINITY_DN128_c1_g1;TRINITY_DN580_c0_g1;TRINITY_DN1155_c1_g2;TRINITY_DN1454_c2_g1;TRINITY_DN1784_c0_g1;TRINITY_DN3160_c0_g1;TRINITY_DN5160_c0_g3;TRINITY_DN6675_c0_g1;TRINITY_DN13593_c0_g2;TRINITY_DN13852_c0_g2;TRINITY_DN22841_c0_g1;TRINITY_DN22841_c0_g2;TRINITY_DN22841_c0_g3;TRINITY_DN23554_c0_g1;TRINITY_DN29368_c1_g1;TRINITY_DN36454_c0_g1
Transcription	Unclassified: genetic information processing	Not Included in Pathway or Brite	9	K19512;K18666;K03627;K11100;K18667;K18774;K19325;K19495;K07740	16	TRINITY_DN55_c0_g1;TRINITY_DN75_c6_g1;TRINITY_DN246_c0_g1;TRINITY_DN724_c0_g2;TRINITY_DN1304_c2_g1;TRINITY_DN1875_c3_g1;TRINITY_DN1847_c0_g1;TRINITY_DN3617_c3_g1;TRINITY_DN4144_c0_g1;TRINITY_DN5277_c0_g1;TRINITY_DN5338_c1_g1;TRINITY_DN18112_c0_g3;TRINITY_DN20301_c0_g8;TRINITY_DN39587_c1_g1;TRINITY_DN52940_c6_g1;TRINITY_DN111847_c1_g1
Lipopolysaccharide biosynthesis	Glycan biosynthesis and metabolism	Metabolism	11	K01627;K00912;K00979;K03270;K02535;K00748;K03272;K03274;K03279;K03271;K03269	16	TRINITY_DN11947_c0_g1;TRINITY_DN14005_c0_g4;TRINITY_DN14005_c0_g1;TRINITY_DN14005_c0_g9;TRINITY_DN21963_c0_g5;TRINITY_DN26268_c0_g5;TRINITY_DN32476_c0_g1;TRINITY_DN33261_c0_g6;TRINITY_DN33261_c0_g7;TRINITY_DN33261_c0_g3;TRINITY_DN38591_c0_g7;TRINITY_DN38591_c0_g2;TRINITY_DN44992_c0_g4;TRINITY_DN44992_c0_g10;TRINITY_DN95761_c0_g7;TRINITY_DN109175_c0_g1
Tropane, piperidine and pyridine alkaloid biosynthesis	Biosynthesis of other secondary metabolites	Metabolism	5	K00276;K14455;K14454;K00817;K00815	15	TRINITY_DN291_c0_g1;TRINITY_DN709_c0_g1;TRINITY_DN931_c3_g1;TRINITY_DN2239_c0_g2;TRINITY_DN4572_c0_g2;TRINITY_DN4572_c0_g3;TRINITY_DN7284_c0_g2;TRINITY_DN24499_c0_g3;TRINITY_DN33114_c0_g1;TRINITY_DN33114_c0_g2;TRINITY_DN36329_c0_g1;TRINITY_DN57052_c0_g1;TRINITY_DN83259_c0_g1;TRINITY_DN83259_c0_g2;TRINITY_DN84444_c0_g1
Benzoate degradation	Xenobiotics biodegradation and metabolism	Metabolism	6	K00626;K01782;K04073;K01666;K00632;K01825	15	TRINITY_DN2289_c0_g1;TRINITY_DN4353_c0_g2;TRINITY_DN10225_c13_g1;TRINITY_DN16657_c4_g1;TRINITY_DN22913_c0_g2;TRINITY_DN32583_c0_g5;TRINITY_DN32583_c0_g1;TRINITY_DN34628_c1_g1;TRINITY_DN34628_c0_g1;TRINITY_DN44015_c0_g1;TRINITY_DN44015_c0_g2;TRINITY_DN44015_c0_g3;TRINITY_DN50484_c0_g1;TRINITY_DN76375_c0_g5;TRINITY_DN76375_c0_g1
Phosphonate and phosphinate metabolism	Metabolism of other amino acids	Metabolism	5	K00967;K00994;K00968;K13644;K00993	15	TRINITY_DN278_c0_g1;TRINITY_DN1124_c6_g1;TRINITY_DN1578_c1_g1;TRINITY_DN1966_c1_g2;TRINITY_DN1966_c1_g1;TRINITY_DN2200_c1_g1;TRINITY_DN2781_c0_g1;TRINITY_DN3060_c0_g1;TRINITY_DN6088_c6_g1;TRINITY_DN8067_c0_g5;TRINITY_DN29241_c0_g1;TRINITY_DN29241_c0_g3;TRINITY_DN35610_c5_g1;TRINITY_DN39880_c0_g2;TRINITY_DN110314_c0_g1
Synthesis and degradation of ketone bodies	Lipid metabolism	Metabolism	5	K01027;K00626;K00019;K01641;K01640	15	TRINITY_DN1050_c0_g2;TRINITY_DN2289_c0_g1;TRINITY_DN4220_c0_g1;TRINITY_DN4299_c0_g1;TRINITY_DN4353_c0_g2;TRINITY_DN4394_c0_g1;TRINITY_DN10225_c13_g1;TRINITY_DN13465_c0_g1;TRINITY_DN16657_c4_g1;TRINITY_DN17718_c1_g1;TRINITY_DN30616_c1_g1;TRINITY_DN34628_c1_g1;TRINITY_DN34628_c0_g1;TRINITY_DN42821_c0_g2;TRINITY_DN51820_c0_g3
Taurine and hypotaurine metabolism	Metabolism of other amino acids	Metabolism	7	K01594;K18592;K00456;K01580;K00681;K18966;K10712	14	TRINITY_DN105_c0_g1;TRINITY_DN541_c0_g1;TRINITY_DN1606_c4_g1;TRINITY_DN2439_c0_g2;TRINITY_DN3404_c0_g1;TRINITY_DN9425_c1_g3;TRINITY_DN11487_c0_g2;TRINITY_DN12965_c0_g1;TRINITY_DN12965_c0_g2;TRINITY_DN14362_c0_g1;TRINITY_DN38011_c0_g2;TRINITY_DN74204_c0_g1;TRINITY_DN110141_c0_g2;TRINITY_DN122150_c0_g1
MAPK signaling pathway - plant	Signal transduction	Environmental Information Processing	4	K17686;K00940;K03781;K02183	14	TRINITY_DN1585_c0_g1;TRINITY_DN3459_c0_g1;TRINITY_DN4906_c0_g2;TRINITY_DN5010_c0_g4;TRINITY_DN5010_c0_g2;TRINITY_DN5010_c0_g3;TRINITY_DN7935_c0_g1;TRINITY_DN15209_c0_g1;TRINITY_DN15959_c0_g1;TRINITY_DN29452_c0_g2;TRINITY_DN36017_c0_g1;TRINITY_DN48597_c0_g1;TRINITY_DN56527_c0_g3;TRINITY_DN87878_c0_g1
Neomycin, kanamycin and gentamicin biosynthesis	Biosynthesis of other secondary metabolites	Metabolism	1	K00844	14	TRINITY_DN2163_c0_g1;TRINITY_DN2265_c3_g1;TRINITY_DN2837_c0_g4;TRINITY_DN2837_c0_g1;TRINITY_DN2837_c0_g2;TRINITY_DN8578_c4_g1;TRINITY_DN10146_c0_g1;TRINITY_DN10146_c0_g2;TRINITY_DN31536_c3_g1;TRINITY_DN39138_c2_g1;TRINITY_DN55142_c1_g2;TRINITY_DN59018_c4_g1;TRINITY_DN59018_c2_g2;TRINITY_DN89004_c3_g1
Photosynthesis	Energy metabolism	Metabolism	9	K02699;K02695;K14332;K02716;K02639;K02111;K02115;K02112;K02721	13	TRINITY_DN8615_c0_g1;TRINITY_DN8615_c0_g2;TRINITY_DN10193_c0_g1;TRINITY_DN10193_c0_g2;TRINITY_DN10193_c0_g3;TRINITY_DN23494_c0_g1;TRINITY_DN23494_c0_g2;TRINITY_DN34470_c0_g3;TRINITY_DN40422_c0_g1;TRINITY_DN40651_c0_g5;TRINITY_DN40651_c0_g2;TRINITY_DN40651_c0_g3;TRINITY_DN42130_c0_g1
Geraniol degradation	Metabolism of terpenoids and polyketides	Metabolism	5	K00022;K01640;K01782;K00632;K01825	12	TRINITY_DN1691_c3_g1;TRINITY_DN1691_c3_g2;TRINITY_DN17718_c1_g1;TRINITY_DN22913_c0_g2;TRINITY_DN23924_c0_g2;TRINITY_DN44015_c0_g1;TRINITY_DN44015_c0_g2;TRINITY_DN44015_c0_g3;TRINITY_DN50484_c0_g1;TRINITY_DN71060_c0_g1;TRINITY_DN76375_c0_g5;TRINITY_DN76375_c0_g1
Circadian rhythm - plant	Environmental adaptation	Organismal Systems	4	K03115;K03097;K10143;K12124	11	TRINITY_DN332_c0_g1;TRINITY_DN2160_c0_g1;TRINITY_DN2219_c0_g1;TRINITY_DN2897_c0_g1;TRINITY_DN6587_c0_g1;TRINITY_DN10199_c0_g4;TRINITY_DN80026_c0_g1;TRINITY_DN90739_c0_g1;TRINITY_DN99189_c0_g1;TRINITY_DN115409_c0_g1;TRINITY_DN131831_c1_g1
Others	Unclassified: metabolism	Not Included in Pathway or Brite	8	K06201;K03926;K13827;K03670;K06999;K02039;K13825;K06202	11	TRINITY_DN4152_c0_g1;TRINITY_DN5970_c0_g1;TRINITY_DN10399_c1_g1;TRINITY_DN19438_c0_g4;TRINITY_DN19438_c0_g11;TRINITY_DN19882_c0_g1;TRINITY_DN22784_c0_g3;TRINITY_DN35465_c0_g6;TRINITY_DN41158_c0_g1;TRINITY_DN43755_c0_g11;TRINITY_DN109147_c0_g1
Others	Unclassified: signaling and cellular processes	Not Included in Pathway or Brite	8	K06201;K03926;K13827;K03670;K06999;K02039;K13825;K06202	11	TRINITY_DN4152_c0_g1;TRINITY_DN5970_c0_g1;TRINITY_DN10399_c1_g1;TRINITY_DN19438_c0_g4;TRINITY_DN19438_c0_g11;TRINITY_DN19882_c0_g1;TRINITY_DN22784_c0_g3;TRINITY_DN35465_c0_g6;TRINITY_DN41158_c0_g1;TRINITY_DN43755_c0_g11;TRINITY_DN109147_c0_g1
Cationic antimicrobial peptide (CAMP) resistance	Drug resistance: Antimicrobial	Human Diseases	8	K03767;K07660;K10011;K07806;K10012;K19230;K19228;K07264	11	TRINITY_DN1698_c0_g1;TRINITY_DN20450_c0_g1;TRINITY_DN25358_c0_g4;TRINITY_DN25358_c0_g5;TRINITY_DN25358_c0_g6;TRINITY_DN25358_c0_g1;TRINITY_DN25358_c0_g3;TRINITY_DN35517_c2_g1;TRINITY_DN41974_c0_g5;TRINITY_DN41974_c0_g3;TRINITY_DN96130_c0_g3
Bacterial secretion system	Membrane transport	Environmental Information Processing	5	K03106;K03217;K03070;K02454;K02452	11	TRINITY_DN88_c0_g1;TRINITY_DN3165_c1_g2;TRINITY_DN3165_c1_g1;TRINITY_DN26268_c0_g4;TRINITY_DN26268_c0_g8;TRINITY_DN26268_c0_g11;TRINITY_DN50231_c0_g4;TRINITY_DN50231_c0_g2;TRINITY_DN52558_c0_g2;TRINITY_DN73524_c0_g1;TRINITY_DN80185_c0_g3
Photosynthesis - antenna proteins	Energy metabolism	Metabolism	6	K08910;K08907;K08914;K08913;K08915;K08917	10	TRINITY_DN7755_c0_g1;TRINITY_DN7755_c0_g2;TRINITY_DN14109_c0_g1;TRINITY_DN14109_c0_g2;TRINITY_DN17060_c0_g1;TRINITY_DN38258_c0_g1;TRINITY_DN38258_c0_g2;TRINITY_DN38866_c0_g1;TRINITY_DN38866_c0_g2;TRINITY_DN71945_c0_g1
Energy metabolism	Unclassified: metabolism	Not Included in Pathway or Brite	9	K03521;K07554;K03613;K03615;K03614;K03617;K04013;K15827;K02379	10	TRINITY_DN1020_c0_g1;TRINITY_DN1020_c0_g2;TRINITY_DN8109_c0_g1;TRINITY_DN29584_c0_g4;TRINITY_DN29584_c0_g1;TRINITY_DN29584_c0_g3;TRINITY_DN35372_c0_g10;TRINITY_DN38589_c0_g4;TRINITY_DN47016_c0_g1;TRINITY_DN73562_c0_g4
Limonene and pinene degradation	Metabolism of terpenoids and polyketides	Metabolism	3	K00128;K01782;K01825	10	TRINITY_DN47_c0_g1;TRINITY_DN4157_c0_g1;TRINITY_DN8548_c0_g1;TRINITY_DN22323_c0_g2;TRINITY_DN22913_c0_g2;TRINITY_DN44015_c0_g1;TRINITY_DN44015_c0_g2;TRINITY_DN76375_c0_g5;TRINITY_DN76375_c0_g1;TRINITY_DN121562_c0_g2
Chloroalkane and chloroalkene degradation	Xenobiotics biodegradation and metabolism	Metabolism	3	K00128;K00121;K08726	9	TRINITY_DN47_c0_g1;TRINITY_DN4157_c0_g1;TRINITY_DN8369_c0_g4;TRINITY_DN8548_c0_g1;TRINITY_DN13134_c0_g1;TRINITY_DN19298_c0_g1;TRINITY_DN22323_c0_g2;TRINITY_DN39667_c0_g1;TRINITY_DN121562_c0_g2
Cyanoamino acid metabolism	Metabolism of other amino acids	Metabolism	4	K18592;K00600;K00681;K01914	9	TRINITY_DN541_c0_g1;TRINITY_DN3404_c0_g1;TRINITY_DN5934_c0_g2;TRINITY_DN12965_c0_g1;TRINITY_DN12965_c0_g2;TRINITY_DN14362_c0_g1;TRINITY_DN33173_c0_g10;TRINITY_DN75264_c0_g13;TRINITY_DN100002_c0_g1
Lysine biosynthesis	Amino acid metabolism	Metabolism	6	K01439;K01928;K01714;K00674;K01778;K00825	9	TRINITY_DN19375_c1_g8;TRINITY_DN24628_c0_g3;TRINITY_DN30185_c0_g1;TRINITY_DN30185_c0_g2;TRINITY_DN33239_c0_g6;TRINITY_DN43755_c0_g2;TRINITY_DN50910_c3_g1;TRINITY_DN50910_c3_g2;TRINITY_DN98466_c0_g1
Caffeine metabolism	Biosynthesis of other secondary metabolites	Metabolism	3	K00106;K00365;K00622	8	TRINITY_DN961_c2_g1;TRINITY_DN13601_c0_g2;TRINITY_DN14150_c1_g2;TRINITY_DN14533_c0_g1;TRINITY_DN16729_c0_g1;TRINITY_DN16751_c0_g1;TRINITY_DN17979_c7_g1;TRINITY_DN117143_c0_g1
Bacterial motility proteins	Protein families: signaling and cellular processes	Brite Hierarchies	5	K05875;K02394;K02393;K07346;K02403	8	TRINITY_DN19555_c0_g1;TRINITY_DN30681_c0_g4;TRINITY_DN30681_c0_g6;TRINITY_DN30681_c0_g7;TRINITY_DN30681_c0_g2;TRINITY_DN47952_c0_g1;TRINITY_DN47952_c0_g8;TRINITY_DN53832_c0_g11
Biotin metabolism	Metabolism of cofactors and vitamins	Metabolism	6	K01942;K01012;K02170;K00652;K00647;K09458	8	TRINITY_DN1630_c0_g1;TRINITY_DN11712_c1_g2;TRINITY_DN11712_c1_g7;TRINITY_DN18906_c0_g3;TRINITY_DN22140_c0_g3;TRINITY_DN22140_c0_g13;TRINITY_DN30331_c0_g11;TRINITY_DN43867_c0_g2
Cofactor metabolism	Unclassified: metabolism	Not Included in Pathway or Brite	4	K18588;K18587;K18586;K03688	8	TRINITY_DN166_c0_g2;TRINITY_DN1326_c2_g2;TRINITY_DN3747_c0_g1;TRINITY_DN6748_c0_g1;TRINITY_DN29762_c0_g3;TRINITY_DN35875_c0_g1;TRINITY_DN35868_c1_g10;TRINITY_DN55054_c0_g2
Biofilm formation - Vibrio cholerae	Cellular community - prokaryotes	Cellular Processes	7	K07173;K05851;K02454;K02452;K03563;K10939;K03087	8	TRINITY_DN26268_c0_g9;TRINITY_DN26268_c0_g12;TRINITY_DN43755_c0_g17;TRINITY_DN50231_c0_g4;TRINITY_DN50231_c0_g2;TRINITY_DN53832_c0_g12;TRINITY_DN75264_c0_g12;TRINITY_DN86369_c0_g1
Aflatoxin biosynthesis	Biosynthesis of other secondary metabolites	Metabolism	2	K01946;K11262	7	TRINITY_DN436_c0_g2;TRINITY_DN1476_c7_g1;TRINITY_DN5811_c0_g2;TRINITY_DN11341_c5_g1;TRINITY_DN35339_c0_g1;TRINITY_DN47723_c0_g1;TRINITY_DN123305_c2_g3
Transport	Unclassified: signaling and cellular processes	Not Included in Pathway or Brite	3	K07085;K03281;K03301	7	TRINITY_DN13943_c0_g1;TRINITY_DN23480_c0_g4;TRINITY_DN23480_c0_g5;TRINITY_DN23480_c0_g2;TRINITY_DN35378_c0_g9;TRINITY_DN113983_c0_g1;TRINITY_DN122313_c0_g4
Replication and repair	Unclassified: genetic information processing	Not Included in Pathway or Brite	6	K07478;K14060;K07358;K14059;K07460;K01146	7	TRINITY_DN8701_c2_g1;TRINITY_DN9807_c0_g9;TRINITY_DN10114_c0_g2;TRINITY_DN27993_c0_g7;TRINITY_DN35378_c0_g1;TRINITY_DN43711_c0_g3;TRINITY_DN87279_c0_g3
Amino acid metabolism	Unclassified: metabolism	Not Included in Pathway or Brite	5	K06997;K19625;K06203;K04027;K04023	7	TRINITY_DN6268_c0_g1;TRINITY_DN9303_c0_g1;TRINITY_DN9947_c0_g4;TRINITY_DN12710_c0_g7;TRINITY_DN23246_c0_g2;TRINITY_DN36072_c0_g2;TRINITY_DN44551_c0_g2
Aminobenzoate degradation	Xenobiotics biodegradation and metabolism	Metabolism	4	K07515;K01512;K07514;K07511	6	TRINITY_DN985_c2_g1;TRINITY_DN1607_c2_g1;TRINITY_DN2583_c0_g2;TRINITY_DN4749_c1_g1;TRINITY_DN40474_c3_g1;TRINITY_DN83778_c0_g1
C5-Branched dibasic acid metabolism	Carbohydrate metabolism	Metabolism	4	K17724;K01703;K01903;K01704	6	TRINITY_DN11757_c0_g1;TRINITY_DN25856_c0_g4;TRINITY_DN25856_c0_g1;TRINITY_DN25856_c0_g3;TRINITY_DN32190_c0_g1;TRINITY_DN57812_c1_g1
Peptidoglycan biosynthesis	Glycan biosynthesis and metabolism	Metabolism	6	K00075;K03814;K01928;K01924;K01000;K00790	6	TRINITY_DN16390_c0_g5;TRINITY_DN21963_c0_g10;TRINITY_DN24628_c0_g3;TRINITY_DN26268_c0_g10;TRINITY_DN29030_c0_g2;TRINITY_DN43722_c0_g7
Phenylpropanoid biosynthesis	Biosynthesis of other secondary metabolites	Metabolism	3	K11188;K00430;K03782	6	TRINITY_DN297_c4_g1;TRINITY_DN70719_c0_g1;TRINITY_DN70719_c0_g2;TRINITY_DN70719_c3_g1;TRINITY_DN73185_c0_g1;TRINITY_DN129481_c0_g11
Lipoic acid metabolism	Metabolism of cofactors and vitamins	Metabolism	3	K03644;K10105;K03801	6	TRINITY_DN1059_c1_g1;TRINITY_DN3053_c2_g2;TRINITY_DN7651_c1_g1;TRINITY_DN25186_c0_g6;TRINITY_DN25186_c0_g2;TRINITY_DN25186_c0_g9
Flagellar assembly	Cell motility	Cellular Processes	3	K02394;K02393;K02403	5	TRINITY_DN30681_c0_g4;TRINITY_DN30681_c0_g6;TRINITY_DN30681_c0_g7;TRINITY_DN30681_c0_g2;TRINITY_DN53832_c0_g11
Insect hormone biosynthesis	Metabolism of terpenoids and polyketides	Metabolism	1	K00128	5	TRINITY_DN47_c0_g1;TRINITY_DN4157_c0_g1;TRINITY_DN8548_c0_g1;TRINITY_DN22323_c0_g2;TRINITY_DN121562_c0_g2
Cutin, suberine and wax biosynthesis	Lipid metabolism	Metabolism	2	K13356;K15406	5	TRINITY_DN2936_c1_g2;TRINITY_DN2936_c1_g1;TRINITY_DN11572_c0_g1;TRINITY_DN22699_c1_g1;TRINITY_DN112124_c0_g1
Sesquiterpenoid and triterpenoid biosynthesis	Metabolism of terpenoids and polyketides	Metabolism	2	K00511;K00801	4	TRINITY_DN2458_c0_g1;TRINITY_DN13322_c0_g1;TRINITY_DN13322_c0_g2;TRINITY_DN21511_c0_g1
Novobiocin biosynthesis	Biosynthesis of other secondary metabolites	Metabolism	3	K00817;K00815;K04517	4	TRINITY_DN24499_c0_g3;TRINITY_DN33114_c0_g1;TRINITY_DN33114_c0_g2;TRINITY_DN92556_c0_g1
Protein processing	Unclassified: genetic information processing	Not Included in Pathway or Brite	4	K02380;K03664;K03545;K07401	4	TRINITY_DN17506_c0_g6;TRINITY_DN19988_c0_g1;TRINITY_DN75074_c0_g9;TRINITY_DN78734_c0_g1
Biosynthesis of ansamycins	Metabolism of terpenoids and polyketides	Metabolism	1	K00615	4	TRINITY_DN643_c1_g1;TRINITY_DN17019_c4_g1;TRINITY_DN33738_c2_g1;TRINITY_DN79923_c0_g1
Glucosinolate biosynthesis	Biosynthesis of other secondary metabolites	Metabolism	1	K01703	3	TRINITY_DN25856_c0_g4;TRINITY_DN25856_c0_g1;TRINITY_DN25856_c0_g3
Zeatin biosynthesis	Metabolism of terpenoids and polyketides	Metabolism	1	K00791	3	TRINITY_DN7489_c0_g1;TRINITY_DN18393_c3_g1;TRINITY_DN41421_c0_g6
Styrene degradation	Xenobiotics biodegradation and metabolism	Metabolism	2	K01555;K00451	3	TRINITY_DN4186_c0_g1;TRINITY_DN23358_c0_g1;TRINITY_DN64948_c2_g1
Vancomycin resistance	Drug resistance: Antimicrobial	Human Diseases	2	K01775;K01000	3	TRINITY_DN18468_c0_g9;TRINITY_DN21565_c0_g11;TRINITY_DN29030_c0_g2
Monobactam biosynthesis	Biosynthesis of other secondary metabolites	Metabolism	2	K01714;K00956	3	TRINITY_DN30185_c0_g1;TRINITY_DN30185_c0_g2;TRINITY_DN52563_c0_g3
Bacterial toxins	Protein families: signaling and cellular processes	Brite Hierarchies	2	K01197;K01186	3	TRINITY_DN4693_c0_g1;TRINITY_DN5119_c0_g1;TRINITY_DN14526_c0_g1
Naphthalene degradation	Xenobiotics biodegradation and metabolism	Metabolism	1	K00121	3	TRINITY_DN8369_c0_g4;TRINITY_DN19298_c0_g1;TRINITY_DN39667_c0_g1
Antimicrobial resistance genes	Protein families: signaling and cellular processes	Brite Hierarchies	2	K18898;K07660	2	TRINITY_DN19375_c1_g6;TRINITY_DN20450_c0_g1
Nitrotoluene degradation	Xenobiotics biodegradation and metabolism	Metabolism	2	K00622;K06282	2	TRINITY_DN16729_c0_g1;TRINITY_DN25599_c0_g8
Ethylbenzene degradation	Xenobiotics biodegradation and metabolism	Metabolism	1	K00632	2	TRINITY_DN44015_c0_g3;TRINITY_DN50484_c0_g1
Chlorocyclohexane and chlorobenzene degradation	Xenobiotics biodegradation and metabolism	Metabolism	1	K01061	2	TRINITY_DN24053_c0_g1;TRINITY_DN24053_c0_g2
D-Alanine metabolism	Metabolism of other amino acids	Metabolism	1	K01775	2	TRINITY_DN18468_c0_g9;TRINITY_DN21565_c0_g11
Cell growth	Unclassified: signaling and cellular processes	Not Included in Pathway or Brite	2	K06190;K07322	2	TRINITY_DN23185_c0_g2;TRINITY_DN31479_c0_g2
Betalain biosynthesis	Biosynthesis of other secondary metabolites	Metabolism	2	K00545;K01593	2	TRINITY_DN863_c0_g1;TRINITY_DN43879_c1_g1
Toluene degradation	Xenobiotics biodegradation and metabolism	Metabolism	1	K01061	2	TRINITY_DN24053_c0_g1;TRINITY_DN24053_c0_g2
Diterpenoid biosynthesis	Metabolism of terpenoids and polyketides	Metabolism	1	K04123	2	TRINITY_DN50726_c0_g2;TRINITY_DN50726_c0_g3
Fluorobenzoate degradation	Xenobiotics biodegradation and metabolism	Metabolism	1	K01061	2	TRINITY_DN24053_c0_g1;TRINITY_DN24053_c0_g2
Xylene degradation	Xenobiotics biodegradation and metabolism	Metabolism	2	K04073;K01666	2	TRINITY_DN32583_c0_g5;TRINITY_DN32583_c0_g1
Prodigiosin biosynthesis	Biosynthesis of other secondary metabolites	Metabolism	1	K00645	2	TRINITY_DN664_c0_g3;TRINITY_DN26661_c0_g9
Dioxin degradation	Xenobiotics biodegradation and metabolism	Metabolism	2	K04073;K01666	2	TRINITY_DN32583_c0_g5;TRINITY_DN32583_c0_g1
Carbapenem biosynthesis	Biosynthesis of other secondary metabolites	Metabolism	2	K00147;K00931	2	TRINITY_DN39591_c0_g5;TRINITY_DN39591_c0_g2
Bacterial chemotaxis	Cell motility	Cellular Processes	2	K10540;K05875	2	TRINITY_DN15214_c0_g2;TRINITY_DN19555_c0_g1
Global maps only	Not included in regular maps	Metabolism	1	K13997	2	TRINITY_DN1540_c1_g1;TRINITY_DN24475_c2_g1
Biosynthesis of vancomycin group antibiotics	Metabolism of terpenoids and polyketides	Metabolism	1	K01710	1	TRINITY_DN2047_c0_g1
Flavone and flavonol biosynthesis	Biosynthesis of other secondary metabolites	Metabolism	1	K01195	1	TRINITY_DN13311_c0_g1
D-Arginine and D-ornithine metabolism	Metabolism of other amino acids	Metabolism	1	K00273	1	TRINITY_DN118895_c0_g1
Indole alkaloid biosynthesis	Biosynthesis of other secondary metabolites	Metabolism	1	K01593	1	TRINITY_DN43879_c1_g1
Carbohydrate metabolism	Unclassified: metabolism	Not Included in Pathway or Brite	1	K06206	1	TRINITY_DN21602_c0_g4
Penicillin and cephalosporin biosynthesis	Biosynthesis of other secondary metabolites	Metabolism	1	K00273	1	TRINITY_DN118895_c0_g1
Arabinogalactan biosynthesis - Mycobacterium	Glycan biosynthesis and metabolism	Metabolism	1	K02851	1	TRINITY_DN22533_c0_g8
Acarbose and validamycin biosynthesis	Biosynthesis of other secondary metabolites	Metabolism	1	K01710	1	TRINITY_DN2047_c0_g1
Biofilm formation - Pseudomonas aeruginosa	Cellular community - prokaryotes	Cellular Processes	1	K03563	1	TRINITY_DN53832_c0_g12
beta-Lactam resistance	Drug resistance: Antimicrobial	Human Diseases	1	K01207	1	TRINITY_DN26661_c0_g6
Plant hormone signal transduction	Signal transduction	Environmental Information Processing	1	K14489	1	TRINITY_DN84085_c0_g1
Polyketide sugar unit biosynthesis	Metabolism of terpenoids and polyketides	Metabolism	1	K01710	1	TRINITY_DN2047_c0_g1
Carotenoid biosynthesis	Metabolism of terpenoids and polyketides	Metabolism	1	K02293	1	TRINITY_DN83127_c0_g1
Unclassified viral proteins	Unclassified: signaling and cellular processes	Not Included in Pathway or Brite	1	K03664	1	TRINITY_DN19988_c0_g1
Phosphotransferase system (PTS)	Membrane transport	Environmental Information Processing	1	K03475	1	TRINITY_DN70137_c0_g7
Nucleotide metabolism	Unclassified: metabolism	Not Included in Pathway or Brite	1	K15049	1	TRINITY_DN3261_c1_g1
